# Supplementary material for: Transcriptomic, and metabolic profiling reveals adaptive mechanisms of Auricularia heimuer to temperature stress
Source: PeerJ. 2025 Jul 21;13:e19713. doi: 10.7717/peerj.19713 (PMC12288747; doi:10.7717/peerj.19713)
Supplement: Supplemental Information 1 [file peerj-13-19713-s001.xlsx]

## Sheet: Sheet1
Supplemental Table 1 Test items and detection methods
Items	Methods
Malondial dehyde content	TBARS assay
Proline content	Acid ninhydrin assay
H2O2 content	Titanium sulfate colorimetry
Superoxide dismutase activity	WST-8
Catalase activity	High-Performance Liquid Chromatography
Peroxidase activity	Guaiacol color assay
lignin peroxidases activity	Veratrol oxidation rate method
Laccase activity	ABTS
Sucrose content	Resorcinol assay
Invertase activity	3,5-Dinitrosalicylic Acid Method (DNS Method)
Glucose content	Glucose Oxidase Method
Fructose content	Resorcinol assay
Fructose-1, 6-diphosphate content	Ultraviolet-Visible Spectrophotometry
Hexokinase activity	High-Performance Liquid Chromatography
Phosphofructokinase activity	Ultraviolet-Visible Spectrophotometry
Pyruvate kinase activity	Ultraviolet-Visible Spectrophotometry
Pyruvic acid content	2,4-Dinitrophenylhydrazine Method
Lactic acid content	Lactate Dehydrogenase Colorimetric Method
Lactate dehydrogenase activity	Dinitrophenylhydrazine Microplate Method
