# Supplementary material for: Transcriptomic, and metabolic profiling reveals adaptive mechanisms of Auricularia heimuer to temperature stress
Source: PeerJ. 2025 Jul 21;13:e19713. doi: 10.7717/peerj.19713 (PMC12288747; doi:10.7717/peerj.19713)
Supplement: Supplemental Information 2 [file peerj-13-19713-s002.xlsx]

## Sheet: Sheet1
Supplemental Table 2 The reads,bases number and mapping rate
Sample	Raw reads	Clean reads	precentage of cleans reads(%)	Bases No	Mapping rate(%)	GC content(%)
LT_1	45851062	45472036	0.991734	6793412815	38105967(83.8%)	60.76
LT_2	49542096	49213568	0.993369	7388816830	41383701(84.09%)	60.94
LT_3	52022860	51656948	0.992966	7748540923	43831171(84.85%)	60.75
NT_1	52679980	52334734	0.993446	7839549284	44507815(85.04%)	60.91
NT_2	47437352	47137530	0.99368	7067257301	39904152(84.65%)	60.83
NT_3	52660252	52317318	0.993488	7833711810	44487560(85.03%)	60.92
HT_1	48794786	48415326	0.992223	7260252343	40882065(84.44%)	60.93
HT_2	57464898	57085480	0.993397	8562274491	48396885(84.78%)	60.94
HT_3	49864980	49500244	0.992686	7417712648	41965637(84.78%)	61.26
EHT_1	49884020	49499342	0.992289	7391029653	42071769(84.99%)	60.72
EHT_2	53528048	53120688	0.99239	7911245948	44790825(84.32%)	60.75
EHT_3	46335518	45977600	0.992276	6859458243	38852441(84.5%)	60.61
Annotation
GO	8337(0.5841)
KEGG	4012(0.2811)
COG	1923(0.1347)
NR	12581(0.8815)
Swiss-Prot	6372(0.4464)
Pfam	8351(0.5851)
Total_anno	12628(0.8847)
	Total	14273(1)
