# Supplementary material for: Transcriptomic, and metabolic profiling reveals adaptive mechanisms of Auricularia heimuer to temperature stress
Source: PeerJ. 2025 Jul 21;13:e19713. doi: 10.7717/peerj.19713 (PMC12288747; doi:10.7717/peerj.19713)
Supplement: Supplemental Information 3 [file peerj-13-19713-s003.xlsx]

## Sheet: Sheet1
Supplemental Table 3 Total genes
Gene_id	LT_1	LT_2	LT_3	Mean	NT_1	NT_2	NT_3	Mean	HT_1	HT_2	HT_3	Mean	EHT_1	EHT_2	EHT_3	Mean	Gene_name	Gene_description
gene00001	0	0	0	0	0	0	0	0	0	0	0	0	0	0	0	0		hypothetical protein
gene00002	1.6	1.49	2.73	1.94	2.39	2.07	3.53	2.66333	4.12	2.92	3.96	3.66667	0	0.77	0	0.256667		hypothetical protein
gene00003	0.06	0.29	0.44	0.263333	0.12	0.1	0.11	0.11	0.05	0.05	0.03	0.0433333	0.01	0	0	0.00333333		hypothetical protein
gene00004	0.3	0.11	0	0.136667	0	0	0	0	0.45	0.18	0	0.21	0	0	0	0		hypothetical protein
gene00005	0	0	0	0	0	0	0	0	0	0	0	0	0	0	0	0		hypothetical protein
gene00006	0	0	0	0	0	0	0	0	0	0	0	0	0	0	0	0		hypothetical protein
gene00007	0	0	0	0	0	0	0	0	0	0	0	0	0	0	0	0		hypothetical protein
gene00008	10.44	12.48	15.28	12.7333	12.55	11.76	12.62	12.31	9.87	9.42	8.82	9.37	3.41	9.07	6.86	6.44667		hypothetical protein
gene00009	1.2	1.9	1.97	1.69	2.13	1.7	2.2	2.01	2.83	2.56	3.95	3.11333	0.18	0.28	0.26	0.24		hypothetical protein
gene00010	0.75	3.71	4.08	2.84667	6.17	3.56	3.87	4.53333	8.13	8.8	6.93	7.95333	0.49	0.96	0.55	0.666667		hypothetical protein
gene00011	0	0	0	0	0	0	0	0	0	0	0	0	0	0	0	0		hypothetical protein
gene00012	1.3	2.12	2.45	1.95667	2.02	1.84	1.49	1.78333	2.16	1.96	1.45	1.85667	0.47	1.18	0.79	0.813333		alpha/beta-hydrolase
gene00013	0.05	0.06	0.23	0.113333	0.43	0	0	0.143333	0.06	0.14	0.05	0.0833333	0.03	0.31	0.24	0.193333		hypothetical protein
gene00014	0.16	0	0	0.0533333	0	0	0	0	0	0	0	0	0	0.1	0	0.0333333		hypothetical protein
gene00015	20.18	43.67	62.33	42.06	77.05	77.68	72.57	75.7667	97.49	92.8	91.08	93.79	13.65	34.82	21.67	23.38		hypothetical protein
gene00016	0	0	0	0	0	0	0	0	0	0	0	0	0	0	0	0		hypothetical protein
gene00017	0	0	0	0	0	0	0	0	0	0	0	0	0	0	0	0		hypothetical protein
gene00018	86.88	125.38	128.51	113.59	66.31	63.71	54.2	61.4067	32.25	27.75	26.15	28.7167	1.08	2.43	1.56	1.69	bglX	beta-glucosidase
gene00019	13.44	22.91	36.44	24.2633	41.24	50.94	44.26	45.48	26.5	21.83	20.49	22.94	4.02	6.13	5.47	5.20667		subtilisin-like protein
gene00020	1.02	1.14	2.35	1.50333	1.1	1.67	1.28	1.35	2.85	2.89	2.41	2.71667	0.13	0.49	0.12	0.246667		hypothetical protein
gene00021	2.93	0.7	1.15	1.59333	2.7	0.88	1.46	1.68	4.66	4.39	4.03	4.36	0.63	0.92	1.16	0.903333	xynA	hypothetical protein
gene00022	104.66	171.39	129.68	135.243	188.11	181.57	187.7	185.793	164.2	158.84	158.48	160.507	44.2	95.86	69.52	69.86	msrA	PMSR-domain-containing protein
gene00023	22.63	46.45	50.02	39.7	41.33	38.68	39.41	39.8067	40.91	32.37	31.7	34.9933	4.69	14.35	9.04	9.36		hypothetical protein
gene00024	0.4	0	0.23	0.21	0	0.24	0.42	0.22	0	0	0	0	0	0	0	0		hypothetical protein
gene00025	0	0	0	0	0	0	0	0	0	0	0	0	0	0	0.04	0.0133333		hypothetical protein
gene00026	0	0	0	0	0	0	0	0	0	0	0	0	0	0	0	0		hypothetical protein
gene00027	1.6	4.68	7.62	4.63333	5.88	6.34	7.27	6.49667	5.2	4.93	5.19	5.10667	2.51	6.51	3.23	4.08333	DVRA	hypothetical protein
gene00028	43.24	56.91	38.91	46.3533	45.75	66.58	40.3	50.8767	96.62	100.37	94.93	97.3067	1.8	0	1.01	0.936667		hypothetical protein
gene00029	15.33	26.39	15.7	19.14	22.9	24.65	21.18	22.91	35.73	38	46.08	39.9367	0.35	0.54	0.52	0.47		hypothetical protein
gene00030	6.25	3.29	4.35	4.63	3.83	2.45	4.5	3.59333	3.71	4.43	3.97	4.03667	3.72	5.82	4.75	4.76333	ERF1	peptide chain release factor eRF/aRF subunit 1
gene00031	242.38	392.78	476.15	370.437	432.11	372.45	387.16	397.24	469.77	411.51	416.71	432.663	96.64	193.94	118.3	136.293		hypothetical protein
gene00032	0	0	0	0	0	0	0	0	0	0	0	0	0	0	0	0		hypothetical protein
gene00033	2.84	4.17	4.61	3.87333	4.62	1.99	2.65	3.08667	4.95	3.81	2.91	3.89	1.05	1.01	1.72	1.26		hypothetical protein
gene00034	10.62	20.46	17.02	16.0333	18.53	22.94	17.42	19.63	13.02	10.46	13.22	12.2333	4.51	9.56	6.68	6.91667		hypothetical protein
gene00035	0	0	0	0	0	0	0	0	0	0	0	0	0	0	0	0		P-loop containing nucleoside triphosphate hydrolase protein
gene00036	0	0	0	0	0	0	0	0	0	0	0	0	0	0	0	0		hypothetical protein
gene00037	0	0	0	0	0	0	0	0	0	0	0	0	0	0	0	0		hypothetical protein
gene00038	0	0	0	0	0	0	0	0	0	0	0	0	0	0	0	0		hypothetical protein
gene00039	0	0	0	0	0	0	0	0	0	0	0	0	0	0	0	0		hypothetical protein
gene00040	18.27	58.16	86.24	54.2233	42.19	39.07	34.39	38.55	1.86	1.21	1.03	1.36667	0.27	0.58	1.1	0.65		hypothetical protein
gene00041	29.22	24.97	26.22	26.8033	20.64	20.02	24.01	21.5567	16.21	16.25	14.49	15.65	3.43	9.27	6.31	6.33667	hemH	ferrochelatase
gene00042	0	0	0	0	0	0	0	0	0	0	0	0	0	0	0	0		hypothetical protein
gene00043	0	0	0	0	0	0	0	0	0	0.27	0.16	0.143333	0.05	0.26	0	0.103333		hypothetical protein
gene00044	3.73	2.17	0.89	2.26333	0	0	2.38	0.793333	0.45	0.36	2.06	0.956667	0.36	1.97	1.24	1.19		hypothetical protein
gene00045	9.05	9.66	8.73	9.14667	14.81	22.85	20.43	19.3633	10.08	8.95	7.31	8.78	1.22	4.12	6.19	3.84333		hypothetical protein
gene00046	0	0	0	0	0	0	0	0	0	0	0	0	0	0	0	0		hypothetical protein
gene00047	7.47	22.97	15.77	15.4033	26.17	33.95	28.73	29.6167	22.23	14.82	15.74	17.5967	28.06	6.76	4.34	13.0533		hypothetical protein
gene00048	20.58	55	60.01	45.1967	101.34	52.01	76.54	76.63	32.76	27.79	22.05	27.5333	0.04	0	0	0.0133333		hypothetical protein
gene00049	18.73	30.57	33.61	27.6367	37.89	31.76	34.01	34.5533	37.54	39.38	32.73	36.55	6.19	11.73	7.88	8.6		hypothetical protein
gene00050	13.6	17.25	23.69	18.18	15.15	12.28	9.58	12.3367	8.31	9.48	6.22	8.00333	2.05	3.97	2.88	2.96667		hypothetical protein
gene00051	163.07	98.99	78.81	113.623	63.83	41.05	49.41	51.43	53.04	50.39	35.82	46.4167	12.42	34.5	27.92	24.9467		OPA3-domain-containing protein
gene00052	82.02	127.29	104.94	104.75	109.76	38.37	113.93	87.3533	5.11	5.11	4.6	4.94	0.54	0.8	1.05	0.796667		NAD(P)-binding protein
gene00053	2.98	4.31	4.67	3.98667	7.59	5.33	7.02	6.64667	7.51	5.52	6.16	6.39667	2.59	1.41	2.18	2.06		DNA/RNA polymerase
gene00054	0	0	0	0	0	0	0	0	0	0	0	0	0	0	0	0		hypothetical protein
gene00055	23.01	21.87	19.55	21.4767	22.1	36.62	36.72	31.8133	14.53	16.1	22.37	17.6667	0.56	0.87	0.29	0.573333		bicyclomycin resistance protein
gene00056	132.19	165.3	174.26	157.25	141.63	109.71	133.48	128.273	145.69	119.06	122.52	129.09	83.4	178.13	132.8	131.443		translation initiation factor eIF-2A
gene00057	9.22	12.87	14.82	12.3033	10.23	9.46	7.57	9.08667	7.38	5.82	3.82	5.67333	1.27	3.16	1.39	1.94		hypothetical protein
gene00058	59.93	96.54	90.57	82.3467	51.8	50.92	50.45	51.0567	53.6	41.23	45.44	46.7567	20.37	51.86	30.24	34.1567		hypothetical protein
gene00059	0	0	0	0	0	0	0	0	0	0	0	0	0	0	0	0		hypothetical protein
gene00060	0	0	0	0	0	0	0	0	0	0	0	0	0	0	0	0		hypothetical protein
gene00061	0	0	0	0	0	0	0	0	0	0	0	0	0	0	0	0		hypothetical protein
gene00062	0	0	0	0	0	0	0	0	0	0	0	0	0	0	0	0		hypothetical protein
gene00063	14.38	25.39	18.77	19.5133	19.1	26.87	47.19	31.0533	10.51	20.71	37.52	22.9133	13.53	35.62	39.85	29.6667		hypothetical protein
gene00064	1.05	2.2	2.83	2.02667	3.74	2.22	1.67	2.54333	3.05	3.23	1.72	2.66667	0.32	0.61	0.42	0.45		hypothetical protein
gene00065	1.48	2.22	3.18	2.29333	2.41	1.58	1.27	1.75333	1.72	1.81	1.74	1.75667	0.08	0.09	0.11	0.0933333		hypothetical protein
gene00066	72.42	44.72	48.61	55.25	35.37	47.09	50.23	44.23	7.31	8.07	8.11	7.83	0.43	0.29	0.18	0.3		hypothetical protein
gene00067	1.67	1.14	1.24	1.35	0.47	0.7	0.63	0.6	1.14	0.47	0.79	0.8	0.12	0.24	0.17	0.176667		hypothetical protein
gene00068	33.07	5.16	0	12.7433	103.29	106.63	154.63	121.517	392.12	329.34	549.98	423.813	6.12	48.91	47.09	34.04		hypothetical protein
gene00069	0	0	0	0	0	0	0	0	0	0	0	0	0	0	0	0		hypothetical protein
gene00070	0.41	2.07	2.37	1.61667	1.77	0.24	0.65	0.886667	0.96	0.39	0.88	0.743333	0	0	0.12	0.04		PREDICTED: 36.4 kDa proline-rich protein-like
gene00071	115.74	133.8	124.83	124.79	101.29	90.74	114.3	102.11	105.74	103.24	111.87	106.95	53.31	104.79	130.86	96.32		alpha/beta-hydrolase
gene00072	47.34	0	10.86	19.4	9.14	60.91	49.42	39.8233	146.89	113.79	36.21	98.9633	0	3.42	0	1.14		hypothetical protein
gene00073	1.89	0	2.63	1.50667	0	2.52	4.29	2.27	7.76	2.1	4.66	4.84	0.59	0	0	0.196667		hypothetical protein
gene00074	0	0	0	0	0	0	0	0	0	0	0	0	0	0	0	0		hypothetical protein
gene00075	27.72	45.22	38.04	36.9933	38.17	37.12	36.69	37.3267	42.02	42.14	51.36	45.1733	17.49	37.83	42.32	32.5467		glycoside hydrolase
gene00076	0.33	3.46	4.14	2.64333	2.11	2.11	4.13	2.78333	1.14	0.62	1.05	0.936667	0.05	0.3	0.37	0.24		hypothetical protein
gene00077	8.17	6.03	7.5	7.23333	4.6	3.37	3.92	3.96333	5.33	6.03	3.33	4.89667	4.26	8.19	7.3	6.58333		hypothetical protein
gene00078	0.15	0.5	0	0.216667	0.64	0.17	0	0.27	0.69	0	0.16	0.283333	0	0	0	0		hypothetical protein
gene00079	0	0	0	0	0	0	0	0	0	0	0	0	0	0	0	0		hypothetical protein
gene00080	2155.75	2166.03	2027.44	2116.41	1552.7	1022.45	1333.81	1302.99	1473.72	1196.27	1133.75	1267.91	606.37	1413.29	1312.55	1110.74	RPL44	hypothetical protein
gene00081	0	0	0	0	0	0	0	0	0	0	0	0	0	3.93	0	1.31		hypothetical protein
gene00082	0	0	0	0	0	0	0	0	0	0	0	0	0	0	0	0		FOG: Transposon-encoded proteins with TYA, reverse transcriptase, integrase domains in various combinations
gene00083	1.62	4.76	3.5	3.29333	3.7	3.83	4.24	3.92333	2.35	1.72	1.95	2.00667	1.15	1.33	1.95	1.47667		hypothetical protein
gene00084	0	0.76	0	0.253333	0.21	0.46	0.31	0.326667	0.46	0.19	0	0.216667	0.03	0.18	0.06	0.09		glycoside hydrolase
gene00085	0	0	0	0	0	0	0	0	0	0	0	0	0	0	0	0		hypothetical protein
gene00086	0	0	0	0	0	0	0	0	0	0	0	0	0	0	0.05	0.0166667		hypothetical protein
gene00087	0	0	0	0	0	0	0	0	0	0	0	0	0	0	0	0		hypothetical protein
gene00088	51.34	93.66	90.57	78.5233	72.75	65.32	80.43	72.8333	74.53	67.18	54.37	65.36	21.71	43.96	52.31	39.3267		hypothetical protein
gene00089	70.85	70.73	66.21	69.2633	55.79	45.84	49.31	50.3133	47.94	40.59	39.6	42.71	12.18	21.1	15.55	16.2767		protein serine/threonine phosphatase 2C
gene00090	131.26	138.23	66.78	112.09	55.77	41.17	32.32	43.0867	29.89	23.74	20.66	24.7633	1.67	4.72	4.38	3.59		hypothetical protein
gene00091	0	0	0	0	0	0	0	0	0	0	0	0	0	0	0	0		hypothetical protein
gene00092	0.35	1.9	1.57	1.27333	0.12	0.94	0.12	0.393333	0.13	0	0.12	0.0833333	0.04	0	0.07	0.0366667		hypothetical protein
gene00093	26.74	38.66	42.54	35.98	35.48	44.24	44.2	41.3067	38.32	34.05	34.73	35.7	9.93	30.5	20.01	20.1467		hypothetical protein
gene00094	56.29	63.05	62.43	60.59	71.5	42.07	48.18	53.9167	28.29	25.03	22.08	25.1333	2.95	4.94	5.18	4.35667		hypothetical protein
gene00095	33.58	26.3	29.69	29.8567	33.74	29.48	25.09	29.4367	20.54	19.78	17.06	19.1267	4.75	11.44	8.26	8.15		hypothetical protein
gene00096	6.21	25.53	28.14	19.96	47.61	41.51	44.12	44.4133	5.14	7.18	3.68	5.33333	0.02	0	0	0.00666667		dye-decolorizing peroxidase precursor
gene00097	8.11	9.75	8.07	8.64333	12.4	13.55	8.77	11.5733	14.99	17.85	12.85	15.23	1.27	2.41	3.53	2.40333		cytochrome P450
gene00098	2.2	4.94	4.65	3.93	9.59	7.98	7.72	8.43	5.09	4.69	4.15	4.64333	0.81	1.63	0.97	1.13667		hypothetical protein
gene00099	1.02	4.03	3.47	2.84	16.25	12.3	14.98	14.51	4.74	4.68	2.77	4.06333	0.32	0.38	0.36	0.353333		hypothetical protein
gene00100	33.47	69.53	58.74	53.9133	83.69	97.9	84.84	88.81	57.12	54.35	49.64	53.7033	3.03	9.2	5.54	5.92333		hypothetical protein
gene00101	36.97	69.63	77.39	61.33	60.66	46.96	53.01	53.5433	52.46	51.63	49.82	51.3033	6.09	14.43	11.21	10.5767		hypothetical protein
gene00102	0.49	0.18	0	0.223333	0	0.19	0	0.0633333	0.37	0.45	0.34	0.386667	0.11	0.1	0	0.07		hypothetical protein
gene00103	2056.81	2512.68	2094.26	2221.25	1377.24	798.53	1099.2	1091.66	222.67	232.89	279.03	244.863	30.29	44.83	20.3	31.8067		hypothetical protein
gene00104	618.4	906.26	1035.68	853.447	1269.83	1597.91	1136.92	1334.89	1557.4	1727.6	1621.27	1635.42	5.12	8.24	6.4	6.58667		glucose oxidase
gene00105	78.04	95.9	131.52	101.82	99.95	129.29	80.56	103.267	88.21	58.37	39.85	62.1433	1.59	8.11	2.28	3.99333		glucose oxidase
gene00106	8.35	10.63	14.14	11.04	10.12	10.18	9.09	9.79667	10.98	8.18	9.94	9.7	13.25	28.45	24.57	22.09		hypothetical protein
gene00107	0	0	0	0	0	0	0.97	0.323333	0	0	0	0	0.28	0	1.43	0.57		hypothetical protein
gene00108	39.1	44.9	36.78	40.26	36.85	41.03	45.64	41.1733	40.43	43.75	48.55	44.2433	14.75	31.45	28.61	24.9367		hypothetical protein
gene00109	24.09	13.87	8.67	15.5433	16.43	12.68	9.26	12.79	14.92	15.03	10.2	13.3833	1.02	2.1	1.24	1.45333	FMN1	riboflavin kinase
gene00110	6.02	5.52	5.23	5.59	4.75	4.45	4.2	4.46667	4.99	3.66	3.94	4.19667	0.39	1.2	1.06	0.883333		WD40 repeat-like protein
gene00111	204.57	210.67	247.56	220.933	187.19	241.32	512.07	313.527	213.09	244.35	215.34	224.26	56.17	153.68	113.86	107.903		Calcipressin-domain-containing protein
gene00112	473.76	242.2	243.42	319.793	310.65	453.77	388.28	384.233	577.58	673.16	760.61	670.45	41.1	76.54	67.15	61.5967		NAD(P)-binding protein
gene00113	8.83	11.16	11.53	10.5067	25.31	26.87	18.76	23.6467	37.89	34.57	40.53	37.6633	3.5	7.28	2.73	4.50333		alpha/beta-hydrolase
gene00114	37.54	36.28	56.24	43.3533	60.52	63.17	56.01	59.9	96.16	99.37	90.52	95.35	23.17	35.59	32.27	30.3433		hypothetical protein
gene00115	167.59	168.51	151.5	162.533	183.48	189.01	174.25	182.247	191.42	176.98	177.9	182.1	5.24	17.28	12.49	11.67		hypothetical protein
gene00116	10.94	14.18	12.37	12.4967	17.94	24.5	18.44	20.2933	26.51	26.09	28.77	27.1233	3.89	8.91	5.1	5.96667		hypothetical protein
gene00117	13.87	7.75	14.02	11.88	1.72	2.01	1.7	1.81	4.85	3.42	3.09	3.78667	0.92	0.26	0.27	0.483333		hypothetical protein
gene00118	11.95	23.13	37.2	24.0933	22.69	19.44	23.39	21.84	16.25	17.65	17.41	17.1033	1.21	4.62	4.02	3.28333		hypothetical protein
gene00119	109.55	60.47	56.67	75.5633	61.15	93.21	68.17	74.1767	61.7	54.28	55.67	57.2167	14.7	72.98	45.44	44.3733		cytochrome b5
gene00120	8.66	26.58	42.79	26.01	26.39	19.91	18.96	21.7533	14.03	12.13	12.62	12.9267	1.99	5.62	3.74	3.78333		hypothetical protein
gene00121	78.11	187.87	377.04	214.34	232.1	209.91	184.75	208.92	153.38	140.2	146.32	146.633	1.05	2.53	3.65	2.41		hypothetical protein
gene00122	0	0	0	0	0	0	0	0	0	0	0	0	0	0	0	0		hypothetical protein
gene00123	0	0	0	0	0	0	0	0	0	0	0	0	0	0	0	0		hypothetical protein
gene00124	0	0	0	0	0	0	0	0	0	0	0	0	0.04	0	0	0.0133333		hypothetical protein
gene00125	0	0	0	0	0	0	0	0	0	0	0	0	0	0	0	0		hypothetical protein
gene00126	0	0	0	0	0	0	0	0	0	0	0	0	0	0	0	0		hypothetical protein
gene00127	1.45	1.09	4.18	2.24	3.13	4.23	3.38	3.58	6.1	4.19	3.45	4.58	0.23	0.26	0.4	0.296667		hypothetical protein
gene00128	28.01	16.82	14.06	19.63	16.4	16.99	10.1	14.4967	9.82	16.75	23.54	16.7033	2.63	5.39	4.51	4.17667		NAD(P)-binding protein
gene00129	2.9	4.29	3.27	3.48667	5.65	7.2	4.52	5.79	5.84	7.43	5.71	6.32667	0.2	0.84	0.26	0.433333		MFS general substrate transporter
gene00130	562.4	305.19	257.11	374.9	265.49	278.96	292.7	279.05	234.28	235.82	246.81	238.97	55.78	111.54	95	87.44		DUF1014-domain-containing protein
gene00131	101.81	115.06	137.15	118.007	128.73	139.38	171.53	146.547	188.29	186.66	212.88	195.943	26.2	70.09	58.64	51.6433		hypothetical protein
gene00132	27.34	27.32	30.51	28.39	28.08	27.21	29.48	28.2567	35.88	37.23	31.68	34.93	19.42	41.21	39.99	33.54		hypothetical protein
gene00133	12.07	17.06	11.61	13.58	20.21	18.16	14.68	17.6833	22.13	18.31	15.59	18.6767	1.44	4.73	3.26	3.14333	EGL	hypothetical protein
gene00134	10.81	14.19	7.55	10.85	53	48.1	46.82	49.3067	25.74	24.66	32.49	27.63	0.32	0.43	0.05	0.266667	EGL	hypothetical protein
gene00135	87.88	177.25	140.33	135.153	83.58	158.64	292.39	178.203	59.38	110.81	256.26	142.15	50.36	85.83	80.56	72.25	aspS	aspartyl-tRNA synthetase
gene00136	133.37	173.3	182	162.89	201.81	202.59	227.12	210.507	152.54	125.5	136.06	138.033	45.51	90.25	71.01	68.9233	prsA	phosphoribosyl pyrophosphokinase
gene00137	10.13	1.51	1.82	4.48667	13.11	13.98	10.14	12.41	4.19	4.04	0.97	3.06667	4.43	4.94	5.06	4.81		hypothetical protein
gene00138	36.14	44.47	35.17	38.5933	38.82	35.92	38.51	37.75	28.94	27.56	22.93	26.4767	3.14	5.36	6.01	4.83667		hypothetical protein
gene00139	20.65	20.26	20.2	20.37	17.6	17.06	19.03	17.8967	23.34	15.92	15.68	18.3133	4.94	12.72	8.46	8.70667		DNA glycosylase
gene00140	0.37	0.08	0.17	0.206667	0.31	0.6	0.08	0.33	1.18	2.62	0.86	1.55333	0.25	0.67	0.26	0.393333		hypothetical protein
gene00141	1.67	1.17	1.65	1.49667	1.24	1.47	0.2	0.97	0.45	1.64	1.03	1.04	0.13	0.29	0.56	0.326667		hypothetical protein
gene00142	0.27	0	0	0.09	0	0	0	0	0.32	0	0	0.106667	0	0.49	0	0.163333		hypothetical protein
gene00143	7.38	12.31	15.31	11.6667	16.58	13.54	14.69	14.9367	14.82	11.81	9.91	12.18	0.64	2.67	1.58	1.63		DyP-type peroxidase
gene00144	44.71	56.8	63.59	55.0333	58.23	65.35	99.06	74.2133	54.99	57.94	80.09	64.34	18.37	40.82	35.17	31.4533		DUF21-domain-containing protein
gene00145	0.44	0.72	0.91	0.69	0.46	1.1	1	0.853333	1	1.5	1.54	1.34667	0.54	1.2	1.27	1.00333		hypothetical protein
gene00146	0	0	0	0	0	0	0	0	0	0	0	0	0	0	0	0		DNA/RNA polymerase
gene00147	0	0	0	0	0	0	0	0	0	0	0	0	0	0	0.05	0.0166667		hypothetical protein
gene00148	0	0	0	0	0	0	0	0	0	0	0	0	0	0.13	0	0.0433333		hypothetical protein
gene00149	0	0	0	0	0	0	0	0	0	0	0	0	0	0	0	0		hypothetical protein
gene00150	0	0	0	0	0	0	0	0	0	0	0	0	0	0.02	0	0.00666667		hypothetical protein
gene00151	0	0	0	0	0	0	0	0	0	0	0	0	0	0.06	0.03	0.03		hypothetical protein
gene00152	0	0	0.13	0.0433333	0.12	0	0.24	0.12	0.53	0.11	0.12	0.253333	0.15	0.07	0.2	0.14		hypothetical protein
gene00153	0	0	0	0	0	0	0	0	0	0	0	0	0	0	0	0		hypothetical protein
gene00154	3.38	5.42	5.39	4.73	4.39	3.04	4.49	3.97333	4.23	4.69	4.9	4.60667	0.6	1.55	0.92	1.02333		hypothetical protein
gene00155	23.43	24.34	23.34	23.7033	17.5	14.22	15.66	15.7933	18.71	18.35	17.26	18.1067	11.27	25.14	18.54	18.3167		hypothetical protein
gene00156	1.4	5.34	4.82	3.85333	1.93	0.93	0.42	1.09333	3.93	2.44	1.07	2.48	0.33	0.71	1.01	0.683333		hypothetical protein
gene00157	0.37	1.49	2.11	1.32333	1.58	1.15	0.26	0.996667	1.42	1.73	0.65	1.26667	0.53	0.82	0.57	0.64		hypothetical protein
gene00158	46.47	50.17	44.91	47.1833	66.96	67.39	84.33	72.8933	69.54	73.51	74.85	72.6333	19.42	46.26	30.38	32.02	EGL	hypothetical protein
gene00159	6.97	4.24	3.46	4.89	9.72	9.34	6.28	8.44667	19.61	21.87	27.19	22.89	0.48	3.08	2.28	1.94667		hypothetical protein
gene00160	1.05	1.23	1.11	1.13	1.04	1.54	1.03	1.20333	1.86	1.75	0.93	1.51333	0.25	0.21	0.37	0.276667		hypothetical protein
gene00161	3.47	4	4.51	3.99333	3.12	3.49	2.77	3.12667	3.79	2.71	1.85	2.78333	0.49	0.6	1.05	0.713333		hypothetical protein
gene00162	1.84	1.57	2.12	1.84333	1.07	1.85	1.06	1.32667	1.2	1.49	0.95	1.21333	0.4	0.95	0.4	0.583333		hypothetical protein
gene00163	0	0	0	0	0	0	0	0	0	0	0	0	0	0	0	0		hypothetical protein
gene00164	3.6	3.32	4.97	3.96333	2.39	3.54	2.96	2.96333	3.1	3	2.26	2.78667	0.89	1.41	1.02	1.10667		hypothetical protein
gene00165	0	0	0	0	0	0.19	0	0.0633333	0	0.15	0	0.05	0	0	0	0		hypothetical protein
gene00166	22.08	22.51	29.52	24.7033	27.88	33.59	37.48	32.9833	31.21	17.03	22.79	23.6767	3.09	2.6	2.13	2.60667		hypothetical protein
gene00167	84.83	148.99	146.2	126.673	193.3	217.37	235.59	215.42	231.48	196.57	205.01	211.02	52.43	117.28	82.87	84.1933		family 16 glycosyl hydrolase
gene00168	0.33	0	0	0.11	0	0	0	0	0	0	0	0	0	0	0	0		hypothetical protein
gene00169	0	0	0	0	0	0	0	0	0	0	0	0	0	0	0	0		family 16 glycosyl hydrolase
gene00170	0	0	0	0	0	0	0	0	0	0	0	0	0	0	0	0		hypothetical protein
gene00171	0	0	0	0	0	0	0	0	0	0	0	0	0	0	0	0		hypothetical protein
gene00172	0	0	0	0	0	0	0	0	0	0	0	0	0	0	0	0		DNA/RNA polymerase
gene00173	0	0	0	0	0	0	0	0	0	0	0	0	0	0	0	0		hypothetical protein
gene00174	0	0	0	0	0	0	0	0	0	0	0	0	0	0	0	0		hypothetical protein
gene00175	2.46	2.43	3.05	2.64667	2.08	1.18	1.71	1.65667	2.01	1.52	1.27	1.6	0.7	1.39	1.61	1.23333		long-chain-fatty-acid-CoA ligase
gene00176	33.21	57.15	62.56	50.9733	60.03	60.58	69.06	63.2233	54.55	62.66	74.28	63.83	5.59	15.2	11.54	10.7767		hypothetical protein
gene00177	30.09	49.46	59.15	46.2333	46.74	44.51	39.59	43.6133	30.62	32.53	29.86	31.0033	4.07	11.7	8.75	8.17333		thiamin biosynthesis protein
gene00178	32.9	39.99	40.37	37.7533	32.99	20.1	17.67	23.5867	21.15	22.52	17.58	20.4167	0.91	2.78	2.35	2.01333		acetyl-CoA synthetase-like protein
gene00179	20.32	27.04	25.37	24.2433	16.23	11.36	15.6	14.3967	13.66	13.39	10.64	12.5633	1.97	6.15	4.68	4.26667	trpS	tryptophanyl-tRNA synthetase
gene00180	3.19	2.08	3.07	2.78	2.61	1.54	2.12	2.09	2.23	2.44	2.53	2.4	0.37	0.66	0.47	0.5		hypothetical protein
gene00181	50.74	50.23	53.71	51.56	60.04	48.74	49.8	52.86	44.58	44.45	34.87	41.3	3.16	10.42	8.01	7.19667	MAK10	hypothetical protein
gene00182	36.62	41.87	44.32	40.9367	28.37	29.1	31.28	29.5833	47.08	45.61	45.2	45.9633	12.41	22.71	16.9	17.34		hypothetical protein
gene00183	15.76	12.14	12.25	13.3833	8.8	6.05	6.36	7.07	8.19	11.36	7.94	9.16333	1.39	3.62	2.77	2.59333		Arabinanase/levansucrase/invertase
gene00184	14.24	12.86	15.3	14.1333	8.84	8.53	6.3	7.89	12.58	12.91	9.73	11.74	1.9	6.94	4.15	4.33		hypothetical protein
gene00185	0.18	0.2	1.12	0.5	1.62	0.52	0.56	0.9	0.93	0.92	0.76	0.87	0.21	0.38	0.21	0.266667		hypothetical protein
gene00186	139.11	128.3	125.54	130.983	55.19	57.71	64.53	59.1433	35.64	33.23	34.4	34.4233	5.76	11.11	10.73	9.2		Arabinanase/levansucrase/invertase
gene00187	71.49	45.99	47.38	54.9533	40.65	35.38	38.14	38.0567	34.83	29.83	30.54	31.7333	9.91	20.7	19.71	16.7733	proB	glutamate 5-kinase
gene00188	0	0	0	0	0	0	0	0	0	0	0	0	0	0	0	0		tRNA-Gly
gene00189	3.53	6.05	7.94	5.84	16.1	22.65	25.15	21.3	35.11	39.14	33.65	35.9667	1.25	2.78	1.15	1.72667		hypothetical protein
gene00190	4.52	5.08	6.37	5.32333	10.54	15.18	19.39	15.0367	19.11	22.64	25.36	22.37	1.28	3.35	2.77	2.46667		hypothetical protein
gene00191	654.22	468.6	434.04	518.953	340.34	252.07	285.2	292.537	241.55	252.38	249.48	247.803	80.73	180.54	179.4	146.89		hypothetical protein
gene00192	27.81	41.17	33.89	34.29	35.35	36.48	27.27	33.0333	35.97	23.45	21.69	27.0367	20.01	60.38	42.11	40.8333		hypothetical protein
gene00193	30.84	41.22	51.29	41.1167	34.61	26.88	26.82	29.4367	32.84	29.08	28.43	30.1167	11.65	28.53	19.81	19.9967	SUV3	P-loop containing nucleoside triphosphate hydrolase protein
gene00194	3.2	3.04	3.24	3.16	2.02	1.9	2.39	2.10333	2.55	1.86	2.39	2.26667	0.89	1.03	0.79	0.903333		hypothetical protein
gene00195	16.97	21.2	33.87	24.0133	28.17	25.68	28.46	27.4367	27.67	25.58	23.72	25.6567	2.07	6.66	5.36	4.69667		hypothetical protein
gene00196	51.7	50.68	56.67	53.0167	41.17	38.24	39.96	39.79	43.53	42.95	44.74	43.74	11.22	25.6	22.45	19.7567		RNA polymerase II-associated protein
gene00197	0.72	0.83	0.42	0.656667	1.19	0	0.76	0.65	0.43	0.35	1.18	0.653333	0.12	0.21	0.6	0.31		hypothetical protein
gene00198	7.56	6.46	6.42	6.81333	6.25	5.53	7.53	6.43667	3.86	2.63	3.4	3.29667	2.25	2.08	4.35	2.89333		hypothetical protein
gene00199	269.75	337.12	291.97	299.613	256.92	312.12	286.35	285.13	292.88	311.11	316.46	306.817	39.24	121.73	88.9	83.29		histone 3
gene00200	160.29	285.25	264.09	236.543	239.19	230.59	257.23	242.337	309.42	280.4	286.79	292.203	90.81	173.27	155.98	140.02		CC42_CANAL CELL division control protein 42
gene00201	5.45	1.06	1.13	2.54667	5.71	5.57	2.42	4.56667	4.19	3.05	3.43	3.55667	2.58	3.81	6.94	4.44333		hypothetical protein
gene00202	31.43	22.51	20.92	24.9533	33.32	34.32	45.1	37.58	46.88	45.69	38.56	43.71	5.53	13.27	11.38	10.06		hypothetical protein
gene00203	221.55	104.8	69.99	132.113	65.29	94.7	51.97	70.6533	48.63	11.62	46.22	35.49	7.12	5.63	13.96	8.90333		hypothetical protein
gene00204	20.16	35.68	49.58	35.14	39.31	38.19	45.23	40.91	41.66	36.11	42.53	40.1	13.34	31.03	23.31	22.56		hypothetical protein
gene00205	7.56	6.76	10.31	8.21	8.1	7.95	6.33	7.46	4.89	7.65	3.67	5.40333	1.05	1.96	1.67	1.56		hypothetical protein
gene00206	16.08	34.53	43.15	31.2533	34.45	29.01	30.75	31.4033	35.15	31.24	32.8	33.0633	3.26	7.46	6.48	5.73333		DNA replication factor C, large subunit
gene00207	13.44	24.96	44.49	27.63	37.03	36.89	46.81	40.2433	42.25	39.66	34.77	38.8933	8.25	28.74	14.14	17.0433		hypothetical protein
gene00208	34.11	54.12	60.93	49.72	39.16	41.22	42.9	41.0933	44.01	42.85	36.46	41.1067	14.73	31.09	20.47	22.0967		hypothetical protein
gene00209	0	0	0	0	0	0	0	0	0	0	0	0	0	0	0	0		tRNA-Phe
gene00210	100.18	145.7	133.75	126.543	105.66	95.91	96.95	99.5067	116.51	96.67	102.02	105.067	33.26	83.55	47.95	54.92		Dolichyl-diphosphooligosaccharide-protein glycosyltransferase 48kDa subunit
gene00211	224.24	227.21	221.08	224.177	174.55	145.31	171.34	163.733	160.8	137.57	141.5	146.623	30.73	61.46	52.36	48.1833	adk	adenylate kinase 1
gene00212	9.58	19.83	21.96	17.1233	27.86	35.42	40.86	34.7133	26.81	23.2	16.08	22.03	3.25	11.65	5.19	6.69667		hypothetical protein
gene00213	5.57	8.01	11.94	8.50667	12.87	6.44	9.67	9.66	20.09	14.69	15.65	16.81	0.91	0.6	0.42	0.643333		hypothetical protein
gene00214	3.21	4.68	5.33	4.40667	4.6	5	4.28	4.62667	3.82	3.76	3.04	3.54	2.27	4.74	1.63	2.88		hypothetical protein
gene00215	51.41	96.37	156.39	101.39	150.87	143.1	143.19	145.72	172.55	144.84	150.18	155.857	125.45	272.94	150.09	182.827		growth factor receptor domain-containing protein
gene00216	44.7	81.41	88.57	71.56	100.07	105.33	105.41	103.603	125.43	133.94	130.26	129.877	42.37	95.5	57.53	65.1333		hypothetical protein
gene00217	6.79	6.62	6.71	6.70667	7.43	7.14	7.31	7.29333	8.17	4.96	5.61	6.24667	0.96	3.19	1.59	1.91333		hypothetical protein
gene00218	39.21	44.9	37.26	40.4567	32.98	30.84	32.96	32.26	37.78	37.36	35.57	36.9033	43.9	53.23	47.65	48.26		rhamnolipids biosynthesis 3-oxoacyl-reductase
gene00219	27.14	49.51	57.35	44.6667	43.56	41.29	49.57	44.8067	46.43	45.28	48.07	46.5933	12.09	33.06	16.68	20.61		hypothetical protein
gene00220	36.9	37.25	48.58	40.91	35.75	32.35	30.13	32.7433	46.86	42.36	41.63	43.6167	6.62	16.32	11.84	11.5933		WD40 repeat-like protein
gene00221	121.37	71.98	74.28	89.21	87.59	126.69	100.2	104.827	96.62	112.58	104.23	104.477	11.76	23.28	16.89	17.31	wrbA	flavo protein WrbA
gene00222	2.38	9.18	9.26	6.94	39.13	38.77	35.29	37.73	4.42	2.58	1.92	2.97333	0.18	0.72	0.07	0.323333		P-type cation-transporting ATPase
gene00223	7.15	13.27	13.15	11.19	10.86	13.46	12.88	12.4	11.98	13.56	10.59	12.0433	1.71	5.8	4.73	4.08		hypothetical protein
gene00224	15.48	18.96	22.04	18.8267	24.01	20.34	19.19	21.18	31.56	29.19	24.55	28.4333	4.35	11.98	8.19	8.17333		hypothetical protein
gene00225	31.39	51.29	48.22	43.6333	43.27	52.33	51.26	48.9533	35.55	37.28	42.48	38.4367	8	19.09	15.14	14.0767		Pkinase-domain-containing protein
gene00226	0	0	0	0	0	0	0	0	0	0	0	0	0	0	0	0		hypothetical protein
gene00227	101.86	103.34	108.11	104.437	85.42	90	97.77	91.0633	99.34	96.95	102.26	99.5167	25.74	53.65	84.9	54.7633		hypothetical protein
gene00228	469.03	1063.6	1525.57	1019.4	1197.83	1085.76	1051.8	1111.8	1253.89	1116.89	1123.61	1164.8	286.23	543.21	366.19	398.543		OPT oligopeptide transporter
gene00229	14.5	26.49	36.15	25.7133	24.96	26.88	24.22	25.3533	27.12	25.88	21.09	24.6967	5.91	13.38	10.57	9.95333		DNA repair protein
gene00230	20.3	16.94	17.73	18.3233	13.82	12.41	17.94	14.7233	13	15.85	12.32	13.7233	5.66	14.59	10.01	10.0867		FAD/NAD(P)-binding domain-containing protein
gene00231	3.83	3.38	4.33	3.84667	3.66	3	1.41	2.69	2.97	6.21	4.68	4.62	0.53	2.29	2.11	1.64333		hypothetical protein
gene00232	17.87	34.08	53.86	35.27	9.68	8.46	5.55	7.89667	10.24	6.87	6.12	7.74333	0.52	1.27	1.04	0.943333		oligopeptide transporter
gene00233	53.75	57.94	60.8	57.4967	73.99	74.32	71.7	73.3367	103.61	112.42	106.26	107.43	7.66	21.18	16.53	15.1233		hypothetical protein
gene00234	58.51	116.62	150.05	108.393	162.76	195.91	164.15	174.273	298.33	331.55	324.73	318.203	110.81	257.73	129.63	166.057		hypothetical protein
gene00235	4.32	5.11	6.39	5.27333	4.4	2.25	2.84	3.16333	4.48	3.66	3.31	3.81667	0.59	1.45	1.04	1.02667		hypothetical protein
gene00236	8.81	9.16	8.44	8.80333	12.38	11.31	12.14	11.9433	11.83	12.41	8.75	10.9967	3.43	9.09	7.18	6.56667		hypothetical protein
gene00237	27.31	28.58	31.68	29.19	37.23	39.2	46.65	41.0267	54.56	54.63	39.2	49.4633	1.57	6.6	3.67	3.94667		hypothetical protein
gene00238	56.34	66.81	69.74	64.2967	50.56	49.41	54.2	51.39	47.62	47.43	45.59	46.88	18.15	43.79	40.11	34.0167	carA	small subunit of carbamoyl phosphate synthase
gene00239	168.51	126.82	139.42	144.917	157.56	199.9	187.67	181.71	70.87	62.22	65.61	66.2333	61.47	126.06	98.53	95.3533		hypothetical protein
gene00240	788.18	235.48	387.02	470.227	793.34	1317.77	1111.03	1074.05	720.36	642.68	834.66	732.567	26.77	81.94	57.58	55.43		S-adenosyl-L-methionine-dependent methyltransferase
gene00241	376.82	292.22	285.07	318.037	231.1	206.63	241.26	226.33	217.67	197.15	197.34	204.053	66.93	125.46	115.97	102.787		hypothetical protein
gene00242	10	21.62	30.07	20.5633	30.94	36.89	32.08	33.3033	35.31	33.5	28.2	32.3367	5.9	15.66	11.15	10.9033		hypothetical protein
gene00243	463.35	239.81	409.02	370.727	2062.61	3177.11	2425.86	2555.19	1571.51	1555.34	1884.23	1670.36	5.67	18.97	15.75	13.4633		hypothetical protein
gene00244	0.39	0.21	0	0.2	0.1	0	0.1	0.0666667	0.22	0	0.51	0.243333	0.13	0.29	0.28	0.233333		NAD(P)-binding protein
gene00245	50.03	102.9	143.23	98.72	118.4	96.71	106.4	107.17	120.75	110.56	105.27	112.193	22.14	55.62	37.91	38.5567	ATP6N	V0/A0 complex, 116-kDa subunit of ATPase
gene00246	6.73	4.47	5.76	5.65333	3.81	5.33	4.59	4.57667	3.89	5.87	2.84	4.2	2.76	5.54	4.01	4.10333		hypothetical protein
gene00247	34.77	33.8	39.06	35.8767	22.51	26.17	20.53	23.07	23.43	21.03	15.1	19.8533	11.17	26.52	16.83	18.1733		hypothetical protein
gene00248	21.53	33.76	30.29	28.5267	21.75	31.16	16.29	23.0667	37.14	12.02	9.78	19.6467	2.26	6.55	3.37	4.06		NAD(P)-binding protein
gene00249	7.83	15.26	18.74	13.9433	10.77	9.91	6.58	9.08667	10.57	9.9	6.82	9.09667	3.63	11.18	6.95	7.25333		hypothetical protein
gene00250	47.99	65.77	63.77	59.1767	64.91	68.32	76.69	69.9733	72.05	66.85	70.93	69.9433	9.07	27.42	23.34	19.9433		RabGAP/TBC
gene00251	43.09	35.09	29.55	35.91	39.71	52.36	63.01	51.6933	45.91	58.55	49.9	51.4533	4.69	11.01	8.39	8.03		hypothetical protein
gene00252	15.38	27.65	35.82	26.2833	30.61	23.7	22.04	25.45	27.74	23.94	22.68	24.7867	1.85	3.08	3.05	2.66		hypothetical protein
gene00253	85.53	69.34	50.96	68.61	49.37	40.97	39.09	43.1433	29.42	26.11	30.7	28.7433	2.53	3.1	3.02	2.88333		hypothetical protein
gene00254	100.71	118.51	148.08	122.433	82.81	87.58	65.75	78.7133	33.9	25.22	26.27	28.4633	3.76	10.36	6.76	6.96		hypothetical protein
gene00255	85.96	60.8	60.09	68.95	72.38	97.46	84.37	84.7367	68.52	67.17	76.83	70.84	0.95	3.17	3.78	2.63333		GroES-like protein
gene00256	294.25	401.2	491.13	395.527	287.73	364.32	519.31	390.453	279.08	341.24	311.93	310.75	99.16	167.83	105.69	124.227		dicarboxylic amino acid permease
gene00257	80.58	90.28	100.04	90.3	87.4	114.98	78.33	93.57	64.42	79.93	43.99	62.78	25.85	34.59	24.31	28.25		hypothetical protein
gene00258	6.04	5.11	5.3	5.48333	8.72	9.99	7.83	8.84667	8.68	8.38	8.59	8.55	2.37	4.76	4.84	3.99		hypothetical protein
gene00259	6.47	6.72	5.26	6.15	3.68	2.66	3.85	3.39667	3.31	5.63	4.58	4.50667	2.94	4.15	3.62	3.57		hypothetical protein
gene00260	293.05	735.48	852.48	627.003	1145.1	1079.44	1229.25	1151.26	1336.69	1141.04	1163.13	1213.62	188.94	354.96	201.11	248.337		unnamed protein product
gene00261	94.21	38.55	41.42	58.06	49.41	107.97	236.82	131.4	43.23	38.04	36.72	39.33	12.78	32.5	21.79	22.3567		hypothetical protein
gene00262	7.1	8.51	8.13	7.91333	10.13	13.32	15.93	13.1267	18.94	18.95	23.46	20.45	4.01	13.3	8.21	8.50667		NAD(P)-binding protein
gene00263	3.75	2.15	2.14	2.68	1.92	0.82	1.57	1.43667	0.72	1.25	1.08	1.01667	0.48	0.62	0.36	0.486667		hypothetical protein
gene00264	141.28	86.33	66.3	97.97	68.32	57.46	75.09	66.9567	65.59	55.29	56.27	59.05	131.72	183.54	159.5	158.253	plc	PLC-like phosphodiesterase
gene00265	16.7	20.15	16.51	17.7867	14.26	12.64	12.77	13.2233	12.13	15.73	13	13.62	0.59	1.38	1.57	1.18		MFS general substrate transporter
gene00266	26.59	48.3	50.5	41.7967	41.36	34.5	43.85	39.9033	40.05	34.45	32.64	35.7133	2.89	9.21	8.71	6.93667		hypothetical protein
gene00267	114	142.85	129.91	128.92	137.29	113.21	132.85	127.783	128.45	124.67	122.41	125.177	76.85	154.47	118.32	116.547	trpS	tryptophanyl-tRNA synthetase
gene00268	25.76	21.76	22.84	23.4533	16.25	13.41	14.07	14.5767	16.69	14.88	14.91	15.4933	9.14	16.98	17.53	14.55		DNA repair protein rad18
gene00269	9.72	6.43	6.57	7.57333	5.89	9.34	6.08	7.10333	16.91	18.27	19.06	18.08	6.88	17.36	10.81	11.6833		hypothetical protein
gene00270	7.13	4.63	3.06	4.94	3.2	1.85	2.84	2.63	3.73	2.97	3.06	3.25333	0.56	1.1	0.51	0.723333		NAD(P)-binding protein
gene00271	583.94	584.52	703.7	624.053	799	760.03	817.51	792.18	562.67	572.93	561.12	565.573	45.93	127.72	68.81	80.82		nuclear transport factor 2
gene00272	20.61	42.37	44.39	35.79	34.89	34.22	28.35	32.4867	37.83	31.62	25.54	31.6633	4.5	14.07	9.03	9.2		hypothetical protein
gene00273	0	0	0	0	0	0	0	0	0	0	0	0	0	0	0	0		hypothetical protein
gene00274	4.65	2.57	3.17	3.46333	1.25	2.41	3.31	2.32333	1.45	1.94	1.53	1.64	0.3	0.6	0.83	0.576667		hypothetical protein
gene00275	1.77	2.19	2	1.98667	2.37	1.64	1.47	1.82667	2.3	3.08	1.12	2.16667	0.39	1.7	1.21	1.1		hypothetical protein
gene00276	0.16	0.1	0.24	0.166667	0.13	0.08	0.19	0.133333	0.16	0.4	0.34	0.3	0.02	0.06	0.16	0.08		hypothetical protein
gene00277	1.82	0.25	1.93	1.33333	1.32	1.05	1.06	1.14333	1.3	1.16	0.72	1.06	0.45	0.55	0.84	0.613333		hypothetical protein
gene00278	69.13	131.9	172.98	124.67	149.04	123.29	151.4	141.243	137.49	118.82	108.07	121.46	50.84	159.22	77.4	95.82	tbp	TBP-domain-containing protein
gene00279	42.21	54.5	48.33	48.3467	74.27	65.04	71.64	70.3167	67.54	60.08	60.54	62.72	15.91	27.55	28.74	24.0667		hypothetical protein
gene00280	116.97	66.01	49.13	77.37	59	53.69	57.92	56.87	39.42	42.48	44.31	42.07	23.38	35.18	36.54	31.7		S-adenosyl-L-methionine-dependent methyltransferase
gene00281	0	0	0.33	0.11	0.1	0.34	0.1	0.18	0.11	0.09	0	0.0666667	0.32	0.53	0.39	0.413333		hypothetical protein
gene00282	2.21	1.38	1.71	1.76667	2.39	1.44	0.77	1.53333	3.15	3.72	2.64	3.17	8.68	13.79	13.89	12.12		hypothetical protein
gene00283	3.04	5.35	5.65	4.68	6.89	5.96	5.31	6.05333	6.89	7.99	6.34	7.07333	1.83	5.12	4.04	3.66333	DCR1	P-loop containing nucleoside triphosphate hydrolase protein
gene00284	51.87	77.11	92.93	73.97	63.12	52.37	56.26	57.25	63.11	60.27	56.45	59.9433	8.34	19.96	16.47	14.9233		hypothetical protein
gene00285	46.25	54.65	60.42	53.7733	30.2	43.75	81.89	51.9467	42.17	39.8	34.13	38.7	17.55	30.07	23.29	23.6367		glycoside hydrolase family 43 protein
gene00286	3.76	2.48	2.51	2.91667	1.39	1.85	2.1	1.78	1.07	1.63	1.78	1.49333	0.54	0.94	0.93	0.803333		hypothetical protein
gene00287	0	0	0	0	0	0	0	0	0	0	0	0	0	0	0	0		hypothetical protein
gene00288	0	0	0	0	0	0	0	0	0	0	0	0	0	0.02	0	0.00666667		hypothetical protein
gene00289	0	0	0	0	0	0	0	0	0	0	0	0	0	0	0	0		hypothetical protein
gene00290	0	0	0	0	0	0	0	0	0	0	0	0	0	0	0	0		hypothetical protein
gene00291	13.32	25.93	28.62	22.6233	19.01	12.59	15.5	15.7	18.98	14.9	19.58	17.82	2.25	5.88	7.83	5.32		predicted protein
gene00292	129.38	79.27	135.86	114.837	60.69	102.81	236.46	133.32	59.99	74.61	81.67	72.09	3.81	7.25	4.22	5.09333		hypothetical protein
gene00293	0	0	0	0	0	0	0	0	0	0	0	0	0	0	0	0		hypothetical protein
gene00294	0	0	0	0	0	0	0	0	0	0	0	0	0	0	0	0		hypothetical protein
gene00295	0	0	0	0	0	0	0	0	0	0	0	0	0	0	0	0		hypothetical protein
gene00296	29.25	33.76	35.08	32.6967	25.01	21.14	19.94	22.03	19.87	17.72	14.25	17.28	21.94	44.51	42.41	36.2867		hypothetical protein
gene00297	211.89	210.76	239.47	220.707	136.32	105.8	133.82	125.313	143.45	112.25	122.7	126.133	29.24	46.81	50.59	42.2133		hypothetical protein
gene00298	21.72	35.93	26.26	27.97	20.44	23.75	24.38	22.8567	20.02	20.38	22.86	21.0867	6.07	12.57	14.48	11.04		RabGAP/TBC
gene00299	8.37	17.35	28.93	18.2167	22.44	17.39	19.92	19.9167	18.2	16.48	13.16	15.9467	1.79	4.54	2.91	3.08	MOT1	SNF2 superfamily chromatin remodeling protein
gene00300	1.02	1.71	1.2	1.31	1.81	1.59	1.86	1.75333	1.98	1.7	2.3	1.99333	0.44	0.31	0.65	0.466667		hypothetical protein
gene00301	28.91	36.82	39.12	34.95	37.13	33.13	36.29	35.5167	34.3	32.08	33.16	33.18	14.42	28.2	19.1	20.5733		cytochrome P450
gene00302	0.19	0.21	0.43	0.276667	0	0.44	0	0.146667	0.66	0.36	0	0.34	0	0	0	0		hypothetical protein
gene00303	110.49	94.73	93.64	99.62	78.19	57.93	73.62	69.9133	68.32	52	51.85	57.39	43.56	97.62	92.32	77.8333		HIT-like protein
gene00304	8.65	12.39	16.41	12.4833	13.99	14.4	13.94	14.11	17.21	16.84	16.47	16.84	1.47	3	2.59	2.35333		hypothetical protein
gene00305	50.82	48.54	47.72	49.0267	33.99	35.61	34.07	34.5567	36.55	33.91	33.43	34.63	11.78	35.73	23	23.5033	SPF45	hypothetical protein
gene00306	146.9	116.98	96.21	120.03	104.02	99.56	112.65	105.41	112.59	123.84	111.53	115.987	258.07	350.51	290.06	299.547		hypothetical protein
gene00307	3.23	3.66	4.6	3.83	2.5	2.54	2.97	2.67	6.69	5.84	4.6	5.71	1.15	1.55	1.27	1.32333		hypothetical protein
gene00308	51.33	48.67	57.03	52.3433	35.94	22.71	32.32	30.3233	29.64	30.97	24.23	28.28	9.99	21.57	19.71	17.09		hypothetical protein
gene00309	198.09	343.36	220.84	254.097	669.16	426.59	413.13	502.96	352.56	310.97	336.78	333.437	6.61	18.61	16.22	13.8133		secreted protein 1
gene00310	7.35	5.98	7.42	6.91667	8.39	9.65	8.89	8.97667	7.94	7.48	6.04	7.15333	6.75	16.92	13.23	12.3		hypothetical protein
gene00311	3.69	4.3	6.95	4.98	8.19	3.55	2.17	4.63667	9.98	6.64	5.18	7.26667	4.92	13.77	10.07	9.58667		hypothetical protein
gene00312	55.61	46.34	40.41	47.4533	34.93	30.1	30.25	31.76	33.17	26.77	28.1	29.3467	12.12	22.27	17.95	17.4467		hypothetical protein
gene00313	33.42	13.26	19.59	22.09	7.87	16.76	7.17	10.6	0	0	7.75	2.58333	0	4.39	0	1.46333		hypothetical protein
gene00314	113.88	281.47	142.9	179.417	477.95	203.33	311.82	331.033	271.78	179.02	177.17	209.323	6.48	0	1.07	2.51667		hypothetical protein
gene00315	7.12	13.68	7.52	9.44	4.49	2.15	11.39	6.01	5.39	7.83	10.92	8.04667	1.73	3.63	1.23	2.19667		tRNA-intron endonuclease catalytic domain-like protein
gene00316	6.51	10.18	10.66	9.11667	9.36	6.29	8.44	8.03	9.04	8.6	7.92	8.52	2	5.86	3.44	3.76667		hypothetical protein
gene00317	64.72	86.51	81.57	77.6	114.07	55.62	98.36	89.35	188.45	138.25	132.4	153.033	5.64	10.97	8.7	8.43667		hypothetical protein
gene00318	47.23	94.62	128.54	90.13	90.07	71.23	97.61	86.3033	96.98	112.48	106.07	105.177	11.2	25.73	28.81	21.9133		hypothetical protein
gene00319	109.27	127.88	132.58	123.243	109.95	85.49	108.48	101.307	94.93	82.1	86.2	87.7433	15.27	34.35	27.77	25.7967	SRV2	adenylyl cyclase-associated protein
gene00320	338.63	287.81	203.77	276.737	268.36	284.75	285.9	279.67	231.14	263.83	238.31	244.427	21.48	60.91	55.32	45.9033	TFAR19	DNA-binding TFAR19-related protein
gene00321	12.28	36.27	57.1	35.2167	44.89	40.81	47.25	44.3167	45.17	46.77	49.08	47.0067	7.45	19.71	13.63	13.5967	MOT2	hypothetical protein
gene00322	29.25	22	23.37	24.8733	15.69	10.92	11.76	12.79	13.92	10.95	12.81	12.56	13.12	24.44	19.96	19.1733	LCP5	hypothetical protein
gene00323	46.85	57.63	69.6	58.0267	66.79	70.6	70.75	69.38	57.02	56.85	53.84	55.9033	6.37	14.78	11.33	10.8267		hypothetical protein
gene00324	21.4	17.07	17.31	18.5933	25.17	29.14	27.95	27.42	29.42	22.43	20.36	24.07	11.78	19.92	14.56	15.42		hypothetical protein
gene00325	13.95	50.11	113.61	59.2233	80.65	65.81	59.3	68.5867	94.85	84.51	72.47	83.9433	4.94	17.53	10.26	10.91		hypothetical protein
gene00326	15.07	26.7	41.17	27.6467	27.34	16.95	18.77	21.02	25.6	23.61	19.57	22.9267	8.21	23.58	15.43	15.74	MYBBP1A	hypothetical protein
gene00327	8.23	11.52	17.71	12.4867	11.77	12.12	12.38	12.09	14.41	13.05	11.64	13.0333	4.81	12.08	10.43	9.10667		hypothetical protein
gene00328	29.56	41.35	42.26	37.7233	30.91	20.09	26.78	25.9267	28.68	23.07	29.27	27.0067	7.27	18.09	17.66	14.34	ATP12	ATP12-domain-containing protein
gene00329	15.12	19.9	12.05	15.69	15.59	19.7	15.84	17.0433	13.78	11.65	11.7	12.3767	4.44	6.83	6.27	5.84667	phrB	cryptochrome
gene00330	10.9	18.44	21.3	16.88	19.77	10.49	12	14.0867	19.1	16.39	14.7	16.73	5.1	15.24	16.08	12.14		hypothetical protein
gene00331	31.88	46.58	55.29	44.5833	59.8	54.81	62.87	59.16	63.02	55.36	58.76	59.0467	17.56	46.15	31.31	31.6733		hypothetical protein
gene00332	410.13	732.67	804.59	649.13	928.15	880.71	951.26	920.04	1273.97	1211.28	1222.81	1236.02	251.9	551.68	374.98	392.853		hypothetical protein
gene00333	4.44	11.84	25.54	13.94	15.96	13.29	13.84	14.3633	21.23	20.66	18.46	20.1167	4.25	10.25	6.51	7.00333		hypothetical protein
gene00334	16.96	29.82	35.17	27.3167	36.75	42.49	36.09	38.4433	31.89	34.94	41.82	36.2167	5.69	14.91	9.53	10.0433		guanine-N(7)-methyltransferase
gene00335	1.16	1.35	1.78	1.43	1.21	1.22	1.35	1.26	2.3	2.41	2.31	2.34	0.61	0.41	0.78	0.6		hypothetical protein
gene00336	101.34	92.41	89.47	94.4067	62.32	37.26	61.47	53.6833	58.58	48.42	48.73	51.91	2.91	5.95	6.04	4.96667		hypothetical protein
gene00337	55.53	56.59	60.8	57.64	49.81	53.15	61.76	54.9067	43.29	42.67	43.59	43.1833	5.02	10.73	10.18	8.64333		hypothetical protein
gene00338	21.01	39.42	60.24	40.2233	60.25	53.98	56.86	57.03	52.31	51.71	44.53	49.5167	5.76	20.5	14.43	13.5633	CRM1	hypothetical protein
gene00339	95.3	111.72	118.52	108.513	99.96	79.57	93.84	91.1233	102.72	92.37	88.03	94.3733	14.49	33.22	31.23	26.3133	TCP1	T-complex protein 1
gene00340	40.55	99.73	139.6	93.2933	132.76	155.25	142.3	143.437	216.7	217.21	150.52	194.81	16.69	61.78	44.47	40.98		hypothetical protein
gene00341	14.7	9.42	7.4	10.5067	6.72	5.27	7.22	6.40333	8.46	5.65	4.99	6.36667	1.55	4.52	3.48	3.18333		hypothetical protein
gene00342	948.35	1802.71	1618.81	1456.62	738.09	1049.49	1233.52	1007.03	464.03	589.29	788.88	614.067	13.69	43.66	19.94	25.7633		hypothetical protein
gene00343	181.74	215.83	199.65	199.073	131.27	186.52	277.79	198.527	132.85	158.19	210.27	167.103	19.82	37.27	23.33	26.8067	katE	catalase
gene00344	0.26	1.72	1.78	1.25333	0.28	0.91	0.82	0.67	0.75	0.97	0.28	0.666667	1.6	3.13	1.64	2.12333		hypothetical protein
gene00345	57.36	137.23	197.36	130.65	179.16	197.09	205.21	193.82	210.04	208.82	195.43	204.763	60.17	126.17	88.87	91.7367	RSP5	ubiquitin-protein ligase
gene00346	28.19	27.3	25.52	27.0033	15.48	17.07	20.03	17.5267	23.71	20.73	16.69	20.3767	37.76	69.83	60.65	56.08		hypothetical protein
gene00347	19.99	33.56	41.68	31.7433	36.1	41.95	44.49	40.8467	39.56	28.47	29.47	32.5	14.43	33.58	21.06	23.0233		hypothetical protein
gene00348	15.45	5.36	7.54	9.45	8.93	10.96	10.69	10.1933	9.06	6.35	6.51	7.30667	0.75	6.35	9.31	5.47		alternative sulfate transporter
gene00349	98.52	43.79	82.75	75.02	158.24	198.48	171.91	176.21	83.14	72.55	62.66	72.7833	0.65	3.39	2.86	2.3		alternative sulfate transporter
gene00350	59.61	67.9	74.58	67.3633	49.75	39.95	43.93	44.5433	47.09	49.59	44.25	46.9767	14.17	39.72	34.48	29.4567	pyrD	hypothetical protein
gene00351	70.72	70.69	79.27	73.56	44.38	37.45	34	38.61	42.27	41.04	37.49	40.2667	76.58	129.83	107.44	104.617		hypothetical protein
gene00352	31.57	54.37	56.13	47.3567	53.12	53.52	56.49	54.3767	57.15	52.88	53.25	54.4267	20.95	55.48	37.95	38.1267	UBC6	UBC-like protein
gene00353	1517.81	1377.54	1232.1	1375.82	968.33	783.52	1051.45	934.433	855.97	670.43	761.51	762.637	324.61	656.77	615.55	532.31		hypothetical protein
gene00354	43.19	51.06	50.25	48.1667	48.71	36.62	43.64	42.99	54.2	48.93	47.65	50.26	26.56	52	43.06	40.54		RCC1/BLIP-II
gene00355	28.53	39.26	40.96	36.25	33.94	28.63	29.38	30.65	45.18	39.45	38.23	40.9533	17.35	39.66	25.38	27.4633	yneE	UPF0187-domain-containing protein
gene00356	150.75	200.68	207.35	186.26	211.82	190.89	199.57	200.76	227.48	196.78	201.15	208.47	87.27	124.15	100.65	104.023		hypothetical protein
gene00357	27.73	38.5	59.02	41.75	80.95	77.68	73.88	77.5033	83.95	80.87	66.06	76.96	14.61	33.21	25.9	24.5733		hypothetical protein
gene00358	47.23	72.04	77.38	65.55	67.49	59.24	56.69	61.14	72.27	62.3	53.9	62.8233	11.78	26.05	22.18	20.0033		hypothetical protein
gene00359	58.61	38.15	33.15	43.3033	53.1	41.69	41.04	45.2767	33.09	38.56	55.68	42.4433	0.98	2.18	3.66	2.27333		hypothetical protein
gene00360	35.85	159.72	90.37	95.3133	208.48	108.14	95.24	137.287	175.79	153.47	232.09	187.117	3.39	6.04	5.71	5.04667		hypothetical protein
gene00361	297.9	862.69	1091.82	750.803	1073.09	900.52	848.86	940.823	644.92	621.43	603.59	623.313	15.25	42.17	28.49	28.6367		trehalose phosphorylase
gene00362	5.55	10.78	17.85	11.3933	12.65	10.45	9.59	10.8967	13.14	14.42	8.73	12.0967	3.71	12.09	10.62	8.80667		hypothetical protein
gene00363	132.76	98.44	95.53	108.91	56.86	67.74	69.61	64.7367	60.45	53.22	47.53	53.7333	31	71.55	63.92	55.49		hypothetical protein
gene00364	4.1	4.4	10.35	6.28333	17.11	16.09	12.34	15.18	51.5	68.62	62.8	60.9733	6	16.98	8.11	10.3633		hypothetical protein
gene00365	74.69	32.19	20.92	42.6	37.87	33.65	40.52	37.3467	24.44	19.42	15.65	19.8367	5.08	14.03	16.16	11.7567		Mog1p/PsbP-like protein
gene00366	15.27	21.38	27.15	21.2667	18.57	16.71	15.62	16.9667	18.43	18.86	15.77	17.6867	2.92	8.3	5.74	5.65333		hypothetical protein
gene00367	12.36	16.93	15.91	15.0667	13.55	10.04	9.61	11.0667	14.34	14.88	11.87	13.6967	2.83	6.82	4.46	4.70333		P-loop containing nucleoside triphosphate hydrolase protein
gene00368	53.83	70.46	87.92	70.7367	63.07	57.7	51.98	57.5833	60.92	58.5	59.78	59.7333	31.04	56.38	37.93	41.7833	fadD	acetyl-CoA synthetase-like protein
gene00369	27.95	40.47	49.76	39.3933	40.67	34.24	33.48	36.13	43.92	39.44	37.24	40.2	18.81	37.7	32.12	29.5433	SAP114	hypothetical protein
gene00370	216.4	274.75	264.29	251.813	598.74	612.88	539.36	583.66	683.52	773.79	840.57	765.96	45.9	103.73	93.4	81.01	qor	NAD(P)-binding protein
gene00371	38.81	137.52	267.68	148.003	239.89	208.56	185.93	211.46	253.98	234.72	208.23	232.31	7.62	20.6	11.13	13.1167	PUF1	hypothetical protein
gene00372	171.07	241.2	187.4	199.89	188.12	217.97	157.36	187.817	219.25	232.02	205.36	218.877	8.41	20.28	15.83	14.84	galA	alpha-galactosidase
gene00373	59.96	46.23	48.84	51.6767	31.15	29.08	27.9	29.3767	30.96	28.4	21.56	26.9733	10.12	26.72	26.34	21.06	TPT1	hypothetical protein
gene00374	40.43	44.33	46.35	43.7033	86.48	67.63	77.39	77.1667	54.67	48.33	46.61	49.87	12.27	35	33	26.7567	asnB	asparagine synthase (glutamine-hydrolysing)
gene00375	15.97	36.93	62.03	38.31	48.74	44.73	43.05	45.5067	53.72	47.74	41.01	47.49	7.56	21.31	16.99	15.2867		Dbl homology domain-containing protein
gene00376	31.35	39.68	41.74	37.59	52.41	34.39	42.25	43.0167	48.18	29.88	24.45	34.17	11.52	25.01	17.54	18.0233		hypothetical protein
gene00377	94.74	111.22	138.89	114.95	117.18	106.8	126.57	116.85	114.66	106.19	104.81	108.553	15.66	41.03	38.97	31.8867		scamp-domain-containing protein
gene00378	421.28	778.2	826.99	675.49	648.59	648.13	564.28	620.333	476.07	430.5	428.4	444.99	151.09	373.81	252.74	259.213		hypothetical protein
gene00379	108.6	75.1	80.37	88.0233	67.83	62.65	71.27	67.25	66.92	69.14	71.92	69.3267	29.57	50.99	47.69	42.75		NAD(P)-binding protein
gene00380	17.95	27.17	33.58	26.2333	21.32	18.16	18.36	19.28	22.24	17.03	15.99	18.42	1.76	4.46	3.64	3.28667	SWI3	Swi3-domain-containing protein
gene00381	108.99	84.44	76.04	89.8233	74.58	57.42	70.04	67.3467	58.6	59.04	60.87	59.5033	21.95	31.15	30.28	27.7933	NTM1	DUF858-domain-containing protein
gene00382	345.64	203.24	239.5	262.793	246.08	320.09	306.81	290.993	247.56	170.71	206.75	208.34	79.22	198.7	108.29	128.737		glycoside hydrolase
gene00383	9.92	17.18	13.29	13.4633	19.44	9.04	13.07	13.85	23.84	17.34	17.14	19.44	3.1	7.19	5.93	5.40667		hypothetical protein
gene00384	6.99	9.84	10.51	9.11333	8.56	14.95	19.51	14.34	10.56	11.03	14.2	11.93	1.32	4.7	1.43	2.48333		hypothetical protein
gene00385	0	0	0	0	0	0	0	0	0	0	0	0	0	0	0	0		hypothetical protein
gene00386	0	0	0	0	0	0	0	0	0	0	0	0	0	0	0	0		hypothetical protein
gene00387	0	0	0	0	0	0	0	0	0	0	0	0	0.02	0	0	0.00666667		hypothetical protein
gene00388	0	0	0	0	0	0	0	0	0	0	0	0	0	0	0	0		hypothetical protein
gene00389	91.17	46.99	32.24	56.8	99.41	179.22	161.74	146.79	40.2	43.62	49.01	44.2767	9.84	11.94	15.92	12.5667		hypothetical protein
gene00390	21.99	28.78	37.23	29.3333	28.29	23.63	25.7	25.8733	30.06	29.6	27.55	29.07	9.85	25.55	21.53	18.9767		WD40 repeat-like protein
gene00391	75.7	144.11	157.32	125.71	124.46	100.43	111.61	112.167	127.03	128.45	114.71	123.397	17.72	46.81	36.97	33.8333	ffh	signal recognition particle protein
gene00392	24.16	45.14	77.91	49.07	64.98	56.77	59.06	60.27	74.59	69.65	59.82	68.02	28.82	180.13	59.19	89.38	SPT6	hypothetical protein
gene00393	417.39	381.56	386.45	395.133	274.03	298.61	288.67	287.103	311.61	306.08	266.51	294.733	76.69	256.94	171.94	168.523		hypothetical protein
gene00394	60.69	106.92	138.7	102.103	128.16	111.3	119.99	119.817	132.5	117.06	116.92	122.16	17.48	47.92	48.05	37.8167	UBP15	cysteine proteinase
gene00395	88.85	83.66	72.03	81.5133	46.02	41.85	60.01	49.2933	43.99	38.34	37.77	40.0333	10.95	22.4	35.04	22.7967		CDP-diacylglycerol--serine O-phosphatidyltransferase
gene00396	226.66	201.68	181.9	203.413	164.84	146.42	184.2	165.153	165.2	152.47	144.5	154.057	288.27	375.32	367.73	343.773		predicted protein
gene00397	19.05	33.09	43.15	31.7633	35.64	28.61	34.32	32.8567	40.7	33.38	33.34	35.8067	11.1	21.34	16.03	16.1567		AAA-domain-containing protein
gene00398	54.82	93.74	102.16	83.5733	95.64	90.7	119.72	102.02	96.23	102.18	100.86	99.7567	32.22	71.72	71.37	58.4367		phosphatidylinositol synthase
gene00399	98.06	290.03	380.43	256.173	376.72	309.3	335.98	340.667	354.29	316.25	346.56	339.033	54.33	116.77	62.56	77.8867		polyadenylate binding protein
gene00400	106.92	279.82	283.39	223.377	279.64	252.84	271.05	267.843	217.35	158.8	226.85	201	35.29	82.89	42.63	53.6033		polyadenylate binding protein
gene00401	16.72	21.01	22.62	20.1167	14.76	10.07	10.49	11.7733	15.75	14.03	12.71	14.1633	3.12	6.33	4.12	4.52333		DNA primase, large subunit
gene00402	20.43	31.61	41.72	31.2533	32.12	28.12	30.46	30.2333	39.78	31.58	23.55	31.6367	7.64	22.07	15.05	14.92		hypothetical protein
gene00403	30.09	28.18	31.31	29.86	31.49	26.18	25.83	27.8333	37.89	38.56	34.35	36.9333	8.02	19.71	17.08	14.9367		WD40 repeat-like protein
gene00404	0.68	0	0	0.226667	0	0	0.36	0.12	0.4	0	0	0.133333	0.66	0.6	0.75	0.67		hypothetical protein
gene00405	79.44	156.2	170.94	135.527	210.08	208.39	206.84	208.437	226.97	242.81	220.26	230.013	10.12	33.34	22.99	22.15		hypothetical protein
gene00406	19.31	36.75	47.11	34.39	34.49	24.8	25.71	28.3333	36.94	30.4	30.37	32.57	5.96	14.74	9.72	10.14		hypothetical protein
gene00407	16.57	25.78	29.74	24.03	23.74	21.59	25.6	23.6433	24.01	27.09	24.76	25.2867	5	14.23	13.96	11.0633	ZFYVE20	hypothetical protein
gene00408	129.12	162.88	175.92	155.973	129.59	101.63	101.74	110.987	127.68	111.84	107.92	115.813	22.05	56.09	49.79	42.6433	PRP19	nuclear matrix protein NMP200
gene00409	15.21	27.59	38.3	27.0333	25.99	25.5	25.67	25.72	26.13	29.83	23.14	26.3667	5.35	12.35	9.52	9.07333		hypothetical protein
gene00410	67.06	124.21	161.56	117.61	108.53	96.65	94	99.7267	135.66	136.99	141.73	138.127	12.16	34.32	28.96	25.1467		zincin
gene00411	45.72	70	85.48	67.0667	63.61	39.26	53.32	52.0633	50.59	42.31	38.11	43.67	9.42	27.45	20.63	19.1667		hypothetical protein
gene00412	0.51	2.28	0.88	1.22333	1.37	1.78	2.92	2.02333	1.77	1.68	2.18	1.87667	1.41	0.75	0.28	0.813333		hypothetical protein
gene00413	14.4	22.31	31.41	22.7067	22.13	16.91	16.27	18.4367	26.65	24.1	23.32	24.69	3.71	11.32	7.45	7.49333	CFT1	hypothetical protein
gene00414	17.93	30.56	40.23	29.5733	24.89	15.6	17.11	19.2	21.52	17.52	15.91	18.3167	0.78	2.03	1.52	1.44333		CDC45-like protein
gene00415	8.06	12.01	15.49	11.8533	13.4	10.98	10.27	11.55	11.52	11.21	8.57	10.4333	1.32	2.99	2.37	2.22667		hypothetical protein
gene00416	652.13	1032.61	1224.52	969.753	1380.64	1248.69	1249.09	1292.81	345.28	380.68	214.57	313.51	543.3	785.84	413.99	581.043		heat shock cognate 70
gene00417	14.14	35.81	42.99	30.98	42.67	38.25	35.02	38.6467	42.05	29.88	31.74	34.5567	3.83	10.02	5.94	6.59667		hypothetical protein
gene00418	118.95	106.13	103.16	109.413	124.83	91.16	98.49	104.827	127.15	126.22	117.92	123.763	41.14	62.79	57.76	53.8967	gltA	citrate synthase-like protein
gene00419	6.14	5.71	8.29	6.71333	10.68	9.96	6.91	9.18333	15.82	14.37	16.8	15.6633	2.98	7.72	4.67	5.12333	RAD51D	P-loop containing nucleoside triphosphate hydrolase protein
gene00420	1763.56	1656.49	1539.81	1653.29	1807.03	1658.16	1885.44	1783.54	1317.24	1228.72	1302.07	1282.68	639.75	786.29	676.06	700.7		elongation factor 1 beta/delta chain
gene00421	97.73	80.93	66.72	81.7933	63.38	61.3	71.27	65.3167	74.22	77.29	70.78	74.0967	20.94	46.54	39.9	35.7933		hypothetical protein
gene00422	165.83	207.4	193.63	188.953	178.07	135.58	177.74	163.797	235.18	212.13	216.32	221.21	26.61	52.73	44.62	41.32	RPT3	26S proteasome subunit P45
gene00423	212.08	243.64	266.16	240.627	190.92	140.88	164.09	165.297	164.72	142.05	130.64	145.803	43.85	111.68	93.83	83.12		hypothetical protein
gene00424	83.55	108.87	119.55	103.99	77.71	73.16	83.66	78.1767	74.67	68.49	58.83	67.33	13.88	40.95	33.04	29.29		glycosyltransferase family 15 protein
gene00425	10.12	19.51	30.06	19.8967	24.42	20.12	20.71	21.75	28.19	24.1	20.87	24.3867	2.82	9.77	6.6	6.39667		kinase-like protein
gene00426	76.81	94.91	106.89	92.87	100.32	125.63	158.21	128.053	132.04	133.23	136.22	133.83	38.51	96.43	81.28	72.0733		hypothetical protein
gene00427	72.21	68.09	67.99	69.43	43.47	37.99	41.63	41.03	46.5	42.18	44.62	44.4333	12.18	28.55	23.33	21.3533		glycosyltransferase family 21 protein
gene00428	94.47	165.21	193.31	150.997	184.53	160.79	152.05	165.79	132.34	123.52	118.39	124.75	9.04	26.97	18.35	18.12		leucyl aminopeptidase
gene00429	232.41	210.11	214.61	219.043	149.53	123.87	132.99	135.463	143.99	122.66	130.47	132.373	51.13	130.6	92.12	91.2833	OST6	oligosaccharyl transferase subunit OST3/OST6 family
gene00430	34.93	61.46	70.95	55.78	93.09	82.7	91.99	89.26	100.77	80.58	77.04	86.13	6.8	22.61	12.69	14.0333		hypothetical protein
gene00431	2.27	5.22	7.2	4.89667	5.9	5	4.26	5.05333	6.45	5.72	4.98	5.71667	1.35	4.48	2.15	2.66		Rad52/22 double-strand break repair protein
gene00432	94.79	50.22	55.11	66.7067	36.86	33	35.01	34.9567	33.77	33.38	28.51	31.8867	14.26	55.55	38	35.9367		MFS general substrate transporter
gene00433	49.85	26.45	24.02	33.44	19.81	16.58	19.49	18.6267	18.37	15.75	16.73	16.95	14.67	26.14	22.54	21.1167		DUF1777-domain-containing protein
gene00434	557.56	433.96	274.35	421.957	472.62	492.92	499.89	488.477	630.46	610.05	630.14	623.55	172.25	412.37	384.51	323.043	SUI1	eukaryotic translation initiation factor 1
gene00435	189.48	101.37	94.61	128.487	79.87	92.53	79.76	84.0533	68.43	77.76	73.75	73.3133	38.87	87	93.44	73.1033		hypothetical protein
gene00436	16.11	30.33	29.33	25.2567	23.24	17.83	23.93	21.6667	23.39	24.18	22.96	23.51	7.14	18.68	17.66	14.4933		hypothetical protein
gene00437	21.52	18.33	25.89	21.9133	15.29	15.5	15.42	15.4033	15.09	15.9	14.22	15.07	4.77	14.07	10.97	9.93667	MAK5	DEAD-domain-containing protein
gene00438	42.78	75.58	69.4	62.5867	98.47	80.89	109.28	96.2133	61.81	59.19	65.34	62.1133	5.44	11.62	8.56	8.54		hypothetical protein
gene00439	140.48	118.28	117.88	125.547	89.1	88.59	77.78	85.1567	112.12	110.24	111.24	111.2	34.57	87.78	67.69	63.3467	CBP20	RNA-binding domain-containing protein
gene00440	71.83	121.51	153.47	115.603	145.97	114.83	143.24	134.68	148.58	127.47	126.96	134.337	17.72	45.52	34.3	32.5133		kinesin heavy chain
gene00441	27.26	9.67	14.78	17.2367	15.43	11.65	18.4	15.16	12.96	18.43	10.79	14.06	5.06	11.72	12.74	9.84	SIR2L5	sirtuin 5
gene00442	10.54	31.82	60.76	34.3733	44.53	36.61	39.25	40.13	45.72	44.68	40.98	43.7933	3.1	11.34	6.29	6.91		hypothetical protein
gene00443	4.36	12.2	25.81	14.1233	28.85	24.11	21.19	24.7167	30.98	29.48	23.53	27.9967	2.63	6.33	4.49	4.48333		hypothetical protein
gene00444	264.49	237.92	217.82	240.077	200.47	167.35	196.22	188.013	175.07	163.93	162.75	167.25	57.92	99.41	100.07	85.8	proC	pyrroline-5-carboxylate reductase
gene00445	53.47	28.25	33.12	38.28	29.15	27.67	30.75	29.19	28.43	27.89	24.31	26.8767	5.49	12.78	11.69	9.98667	TRS120	hypothetical protein
gene00446	9.87	11.96	19.96	13.93	13.75	14.34	13.04	13.71	14.72	15.32	11.44	13.8267	3.04	8.32	4.72	5.36	TFC4	TPR-like protein
gene00447	33.35	32.04	33.23	32.8733	22.7	22.02	23.66	22.7933	25.16	24.22	20.47	23.2833	17.04	49.13	39.24	35.1367		hypothetical protein
gene00448	8.09	12.23	25.15	15.1567	21.12	18.56	17.6	19.0933	20.38	18.71	14.05	17.7133	1.12	3.19	2.01	2.10667		hypothetical protein
gene00449	20.35	22.46	21.39	21.4	16.11	14.33	15.22	15.22	15.94	12.04	12.34	13.44	6.06	12.88	11.08	10.0067		hypothetical protein
gene00450	33.12	53.37	66.89	51.1267	53.76	49.12	49.29	50.7233	53.05	52.6	48.74	51.4633	12.13	31.55	29.94	24.54		MIF4G-domain-containing protein
gene00451	3.22	4.84	6.59	4.88333	7.88	6.64	6.23	6.91667	9.91	7.76	7.36	8.34333	1.57	4.83	3.35	3.25		hypothetical protein
gene00452	0	0	0	0	0	0	0	0	0	0	0	0	0	0	0	0		hypothetical protein
gene00453	93.01	151.04	179.53	141.193	146.98	113.08	129.33	129.797	139.77	123.58	116.76	126.703	23.12	53.55	40.06	38.91		hypothetical protein
gene00454	65.91	88.15	79.18	77.7467	79.43	85.49	82.83	82.5833	100.01	99.6	119.21	106.273	34.59	69.22	53.82	52.5433		TMS membrane protein/tumor differentially expressed protein
gene00455	85.8	64.25	70.25	73.4333	53.23	47.25	48.52	49.6667	48.76	47.36	46.52	47.5467	32.82	88.69	81.98	67.83		hypothetical protein
gene00456	11.74	9.96	11.16	10.9533	17.03	18.05	19.47	18.1833	13.42	14.06	16.03	14.5033	1.4	7.32	3.97	4.23		S-adenosyl-L-methionine-dependent methyltransferase
gene00457	30.64	22.59	20.26	24.4967	17.63	13.74	15.34	15.57	18.19	18.29	16.3	17.5933	2.87	5.8	4.02	4.23		hypothetical protein
gene00458	207.88	284.39	284.5	258.923	227.53	195.16	217.41	213.367	220.8	218.09	197.75	212.213	18.93	53.96	33.1	35.33	trm1	N2,N2-dimethylguanosine tRNA methyltransferase
gene00459	42.12	74.95	114.94	77.3367	106.6	102.1	100.42	103.04	110.77	104.76	98.14	104.557	10.18	27.76	19.24	19.06		Pkinase-domain-containing protein
gene00460	3.95	5.19	10.44	6.52667	9.74	7.56	6.63	7.97667	10.46	10.02	7.92	9.46667	2.37	6.78	4.56	4.57		glycoside hydrolase family 13 and glycosyltransferase family 5 protein
gene00461	15.21	21.28	26.22	20.9033	15.9	14.84	15.52	15.42	15.18	15.8	13.9	14.96	2.94	7.82	4.96	5.24		amino acid transporter
gene00462	15.26	8.88	8.59	10.91	7.07	6.35	6.47	6.63	7.86	8.02	8.12	8	5.21	8.25	6.04	6.5	EXOSC6	ribosomal protein S5 domain 2-like protein
gene00463	142.1	106.28	74.42	107.6	121.9	110.99	118.95	117.28	121.21	109.85	124.41	118.49	121.34	196.83	205.34	174.503		hypothetical protein
gene00464	691.62	802.03	580.13	691.26	1421.79	804.18	905.68	1043.88	1202.91	851.11	753.15	935.723	147.66	166.9	145.28	153.28		hypothetical protein
gene00465	31.46	61.78	85.16	59.4667	93.43	100.46	110.11	101.333	95.28	92.93	88.53	92.2467	19.39	46.76	37.99	34.7133		hypothetical protein
gene00466	8.4	10.46	16.84	11.9	8.29	8.04	8.77	8.36667	9.35	8.57	6.63	8.18333	1.7	3.32	2.88	2.63333		hypothetical protein
gene00467	6.36	9.61	15.04	10.3367	9.74	7.1	6.6	7.81333	8.09	8.02	6.43	7.51333	0.56	1.8	1.21	1.19		prokaryotic type I DNA topoisomerase
gene00468	60.57	99.9	114.12	91.53	139.42	116.6	127.37	127.797	106.1	106.12	105.39	105.87	5.58	15.19	11.3	10.69		hypothetical protein
gene00469	23.34	37.94	39.58	33.62	26.38	19.82	21.09	22.43	28.45	22.26	20.69	23.8	4.46	11.43	10.74	8.87667	KAT1	histone acetyltransferase type B catalytic subunit
gene00470	66.97	54.35	63.36	61.56	43.14	32.68	43.88	39.9	38.56	31.51	34.45	34.84	15.16	37.64	32.75	28.5167	WDR74	WD40 repeat-like protein
gene00471	40.28	41.72	50.99	44.33	51.26	47.45	53.13	50.6133	43	41.75	40.08	41.61	7.93	20.35	15.77	14.6833		hypothetical protein
gene00472	18.52	24.51	30.37	24.4667	33.98	29.8	28.46	30.7467	29.79	28.96	23.93	27.56	3.33	10.57	8.53	7.47667		hypothetical protein
gene00473	29.97	44.42	50.12	41.5033	40.15	30.78	32.79	34.5733	45.41	37.75	33.24	38.8	4.93	13.09	11.7	9.90667		Adaptor protein complex beta subunit
gene00474	12.52	16.85	27.12	18.83	14.08	13.21	11.34	12.8767	19.21	17.42	19.13	18.5867	5.72	20.67	15.23	13.8733		hypothetical protein
gene00475	131.59	163.05	163.02	152.553	292.66	334.95	331.38	319.663	286.44	268.88	283.35	279.557	234.69	801.36	434.12	490.057		hypothetical protein
gene00476	31.82	48.73	51.74	44.0967	32.49	34.04	29.24	31.9233	39.01	35.33	33.74	36.0267	10.02	22.5	19.74	17.42		hypothetical protein
gene00477	56.91	72.54	80.22	69.89	61.83	53.62	59.56	58.3367	60.45	55.95	60.58	58.9933	12.73	31.94	32.14	25.6033		hypothetical protein
gene00478	631.35	273.49	227	377.28	175.64	141.97	177.52	165.043	165.68	143.46	144.66	151.267	142.83	235.01	233.17	203.67	VPS23	hypothetical protein
gene00479	0.52	1.15	0.79	0.82	0	0.6	0.36	0.32	0.4	0.16	0.55	0.37	0.17	0.72	0	0.296667		hypothetical protein
gene00480	12.62	20.8	29.84	21.0867	18.09	15.42	17.37	16.96	19.99	17.95	18.31	18.75	4.09	12.07	9.41	8.52333		nucleolar complex-associated protein 3
gene00481	23.65	28.52	34.63	28.9333	23.23	19.21	20.09	20.8433	27.95	28.05	21.72	25.9067	3.53	9.57	7.32	6.80667		hypothetical protein
gene00482	52.99	105.43	106.04	88.1533	119.9	113.53	109.36	114.263	100.42	84.9	88.37	91.23	6.43	18.53	13.45	12.8033		hypothetical protein
gene00483	26.2	54.82	65.28	48.7667	52.06	47.46	50.07	49.8633	57.75	54.4	46.24	52.7967	3.65	11.78	8.58	8.00333		hypothetical protein
gene00484	223.75	449.04	563.75	412.18	545.38	408.27	494.33	482.66	541.52	482.26	470.35	498.043	199.24	344.44	246.19	263.29		heat shock protein 70
gene00485	61.4	73.65	110.34	81.7967	73.98	75.23	71.99	73.7333	70.1	68.62	60.84	66.52	10.35	36.43	22.45	23.0767		calcium-transporting ATPase
gene00486	28.55	77.43	99.87	68.6167	91.92	84.42	95.38	90.5733	95.66	92.96	86.78	91.8	24.47	46.75	50.37	40.53		hypothetical protein
gene00487	26.84	5.78	5.72	12.78	5.2	3.69	4.75	4.54667	1.88	3.05	1.71	2.21333	0.45	3.14	0	1.19667		hypothetical protein
gene00488	63.4	89.69	98.71	83.9333	58.44	46.82	57.24	54.1667	58.03	50.31	53.25	53.8633	8.27	20.43	15.84	14.8467	trpE	anthranilate synthase component
gene00489	46.39	31.07	27.06	34.84	18.84	20.42	18.49	19.25	17.77	19.6	16.96	18.11	4.54	10.66	10.71	8.63667		SHQ1-domain-containing protein
gene00490	34.32	58.26	58.59	50.39	55.64	49.11	53.58	52.7767	57.03	61.53	61.76	60.1067	10.08	36.57	22.96	23.2033		hypothetical protein
gene00491	105.62	196.55	178.95	160.373	142.47	134.15	137.93	138.183	118.26	105.34	113.04	112.213	18.34	45.61	33.81	32.5867		adenylate kinase
gene00492	13.95	29.51	45.25	29.57	25.44	16.31	20.94	20.8967	20.47	18.27	16.51	18.4167	0.87	1.55	1.06	1.16	EG5	kinesin-domain-containing protein
gene00493	9.88	14.98	24.03	16.2967	22.73	19.14	18.65	20.1733	20.76	20.63	16.58	19.3233	2.1	5.83	4.09	4.00667		hypothetical protein
gene00494	106.32	135.83	147.02	129.723	115.22	107.91	130.96	118.03	103.55	108.24	113.48	108.423	36.04	76.07	83.02	65.0433		hypothetical protein
gene00495	311.72	245.25	209.9	255.623	250.84	256.37	248.1	251.77	262.97	270.56	266.96	266.83	85.51	170.84	124.97	127.107		3-oxoacid CoA-transferase
gene00496	126.11	150.5	155.25	143.953	172.33	165.32	166.57	168.073	116.25	127.91	119.4	121.187	12.87	29.14	20.39	20.8		actin depolymerizing protein
gene00497	386.73	439.2	274.86	366.93	65.73	190.86	421.96	226.183	119.88	178.03	346.06	214.657	16.59	38.34	44.28	33.07		hypothetical protein
gene00498	15.62	55.28	69.22	46.7067	73.19	56.2	63.51	64.3	79.3	73.55	62.9	71.9167	3.9	10.47	7.4	7.25667		hypothetical protein
gene00499	1841.77	2189.38	1784.71	1938.62	3507.59	3651.82	3103.34	3420.92	2810.48	2747.65	3469.51	3009.21	278.24	472.24	417.28	389.253		hypothetical protein
gene00500	33.31	60.82	69.82	54.65	74.14	71.81	68.03	71.3267	83.78	85.26	90.95	86.6633	7.14	17.46	15.49	13.3633		MFS general substrate transporter
gene00501	41.35	65.64	72.84	59.9433	67.13	60.64	67.59	65.12	65.84	62.45	58.35	62.2133	9.84	24.76	31.45	22.0167	PRP28	P-loop containing nucleoside triphosphate hydrolase protein
gene00502	12.83	35.85	59.84	36.1733	58.53	67.3	85.67	70.5	72.11	81.09	67.81	73.67	9.7	27.98	24.84	20.84		hypothetical protein
gene00503	55	87.6	98.78	80.46	77.92	79.02	75.48	77.4733	95.39	92.19	86.07	91.2167	12.02	39.47	24.9	25.4633		hypothetical protein
gene00504	1669.56	1531.69	1420.14	1540.46	1267.09	1668.54	1226.26	1387.3	1078.85	855.04	1063.07	998.987	117.91	240.93	228.03	195.623		hypothetical protein
gene00505	60.44	66.84	62.81	63.3633	78	78.89	79.98	78.9567	116.97	115.11	102.15	111.41	35.21	83.14	85.18	67.8433		FAD/NAD(P)-binding domain-containing protein
gene00506	30.67	51.35	95.55	59.19	95.41	126.92	110.2	110.843	138.87	70.31	40.34	83.1733	7.81	34.17	41.04	27.6733	kynU	kynureninase
gene00507	45.49	44.09	44.26	44.6133	47.03	63.45	48.41	52.9633	60.6	61.12	60.54	60.7533	8.98	26.24	24.57	19.93	kynU	kynureninase
gene00508	636.48	705.5	488.66	610.213	403.66	743.56	602.16	583.127	647.84	954.12	959.04	853.667	59.07	69.71	69.97	66.25		UPF0057-domain-containing protein
gene00509	36.37	15.48	39.27	30.3733	17.21	9.27	38.66	21.7133	33.47	15.68	33.84	27.6633	64.31	106.55	55.5	75.4533		hypothetical protein
gene00510	64.38	55.93	65.92	62.0767	55.2	48.39	49.39	50.9933	53.81	53.92	50.38	52.7033	10.01	21.86	20	17.29		nucleotide-diphospho-sugar transferase
gene00511	380.65	763.52	773.99	639.387	924.71	853.5	881.1	886.437	1003.52	781.25	1053.27	946.013	445.06	909.22	548.23	634.17		hypothetical protein
gene00512	16.69	20.71	27.79	21.73	32.9	35.92	40.15	36.3233	32.95	45.51	49.94	42.8	4.3	9.69	15.22	9.73667		hypothetical protein
gene00513	47.8	83.15	91.26	74.07	90.46	78.95	85.65	85.02	78.61	78.86	75.25	77.5733	14.87	38.16	28.09	27.04		ARM repeat-containing protein
gene00514	6.43	7.97	10.2	8.2	7.84	8.72	9.51	8.69	8.19	6.67	9.63	8.16333	2.94	7.62	5.83	5.46333	GPI15	hypothetical protein
gene00515	7.8	13.91	19.96	13.89	16.88	15.35	19.16	17.13	21.33	21.7	19.58	20.87	5.61	9.93	9.19	8.24333		hypothetical protein
gene00516	87.19	96.64	122.37	102.067	77.18	64.3	65.25	68.91	84.37	73.86	67.66	75.2967	21.01	54.61	46.36	40.66		NOL1/NOP2/sun family putative RNA met
gene00517	243.09	307.81	301.04	283.98	225.31	206.05	226.68	219.347	193.97	192.52	204.86	197.117	24.89	71.48	49.86	48.7433		hypothetical protein
gene00518	15.56	24.02	24.55	21.3767	20.7	20.62	21.44	20.92	47.48	49.91	45.27	47.5533	10.45	24.89	20.54	18.6267		hypothetical protein
gene00519	1.71	0.69	4.91	2.43667	1.95	1.39	1.23	1.52333	2.11	1.13	1.29	1.51	1.29	2.96	4.35	2.86667		hypothetical protein
gene00520	84.06	66.58	86.53	79.0567	73.46	64.85	72.2	70.17	67.01	60.26	54.44	60.57	25.52	59.81	55.26	46.8633	TEF3	hypothetical protein
gene00521	0	0	0	0	0	0	0	0	0	0	0	0	0	0	0	0		tRNA-Ile
gene00522	40.97	76.56	87.77	68.4333	64.78	56.26	53.48	58.1733	50.93	45.74	42.18	46.2833	9.12	22.15	17.2	16.1567		hypothetical protein
gene00523	330.02	331.46	396.54	352.673	568.76	506.62	519.05	531.477	293.24	310.62	134.59	246.15	622.82	978.14	495.07	698.677	htpG	heat shock protein 90
gene00524	125.74	130.17	138.34	131.417	162.79	152.53	144.46	153.26	167.31	170.96	172.62	170.297	22.95	50.64	53.01	42.2	serC	PLP-dependent transferase
gene00525	13.95	13.43	14.36	13.9133	19.28	12.11	13.15	14.8467	19.39	17.38	8.59	15.12	2.06	3.69	1.27	2.34		S-adenosyl-L-methionine-dependent methyltransferase
gene00526	26.18	31.76	18.95	25.63	61.1	83.56	69.24	71.3	49.13	53.8	38.74	47.2233	1.84	3.62	3.42	2.96		hypothetical protein
gene00527	6.45	17.62	22.78	15.6167	16.33	10.79	12.14	13.0867	16.76	11.91	12.23	13.6333	0.17	0.24	0.35	0.253333		WD40 repeat-like protein
gene00528	5.59	8.33	11.3	8.40667	8.17	6.42	6.31	6.96667	7.03	6.18	5.85	6.35333	1.31	3.41	3.19	2.63667	MTMR15	hypothetical protein
gene00529	12.72	24.91	39.91	25.8467	29.99	27.34	32.3	29.8767	30.03	27.45	22.11	26.53	3.82	11.24	12.32	9.12667		phospholipid-translocating P-type ATPase
gene00530	43.81	48.74	63.96	52.17	63.63	45.58	61.66	56.9567	63.55	53.72	58.39	58.5533	26.85	54.09	41.44	40.7933		cell division/GTP binding protein
gene00531	20.65	26.08	31.27	26	36.89	39.18	42.32	39.4633	34.82	29.62	32.46	32.3	11.07	21.98	13.87	15.64		hypothetical protein
gene00532	38.66	49.9	38.26	42.2733	22.94	33.65	43.57	33.3867	48.46	52.31	67.22	55.9967	7.49	19.57	24.98	17.3467		hypothetical protein
gene00533	11.88	19.38	21.55	17.6033	13.2	11.55	13.3	12.6833	17.24	16.07	16.15	16.4867	4.31	9.7	13.21	9.07333	pgsA	hypothetical protein
gene00534	2.83	0.27	0.55	1.21667	0.25	0.55	1.24	0.68	0.83	1.12	0.51	0.82	0.23	0.14	0	0.123333	dtd	D-tyrosyl-tRNA deacylase
gene00535	286.12	122.42	101.82	170.12	79.05	88.55	85.44	84.3467	120.65	149.35	125.15	131.717	11.54	25.32	28.05	21.6367		cyclophilin-like protein
gene00536	21.52	45.69	63.94	43.7167	58.49	53.08	64.79	58.7867	74.53	76.29	71.33	74.05	14.15	36.66	36.02	28.9433		WD40 repeat-like protein
gene00537	15.7	30.24	40.43	28.79	37.46	34.18	34.69	35.4433	52.75	46.93	42.11	47.2633	3.85	10.89	8.41	7.71667		hypothetical protein
gene00538	38.59	26.51	25.13	30.0767	26.37	24.35	25.43	25.3833	23.4	20.87	20.97	21.7467	0.78	0.98	1.78	1.18		WD-40 repeat-containing protein
gene00539	3.65	3.48	3.22	3.45	3.29	3.5	4.24	3.67667	1.48	2.33	1.55	1.78667	1.82	3.66	1.09	2.19		hypothetical protein
gene00540	18.03	28.35	39.01	28.4633	34.46	31.05	38.08	34.53	27	29.33	27.28	27.87	4.86	12.34	10.17	9.12333		hypothetical protein
gene00541	36	48.49	59.04	47.8433	35.32	26.79	35.78	32.63	35.6	32.3	23.38	30.4267	12.37	35.09	28.76	25.4067		hypothetical protein
gene00542	129.21	107.3	82.68	106.397	78.41	70.55	67.6	72.1867	57.16	63.36	47.57	56.03	9.32	30.17	24.64	21.3767	NAT3	N-acetyltransferase
gene00543	12.82	22.8	38.59	24.7367	31.15	26.37	24.94	27.4867	31.71	30.36	24.88	28.9833	2.46	5.92	4.45	4.27667		hypothetical protein
gene00544	5.85	10.89	21.25	12.6633	13.79	11.83	11.21	12.2767	12.49	12.12	10.02	11.5433	1.01	2.9	1.9	1.93667		P-loop containing nucleoside triphosphate hydrolase protein
gene00545	25.71	44.87	52.86	41.1467	50.71	55.03	58.32	54.6867	54.07	57	54.01	55.0267	8.55	25.19	15.09	16.2767		hypothetical protein
gene00546	281.94	269.94	270.27	274.05	222.7	168.5	193.38	194.86	198.68	190.45	167.42	185.517	79.28	137.2	135.86	117.447	TIM23	mitochondrial import protein Pam17
gene00547	27.17	42.14	48.54	39.2833	47.89	48.09	46.16	47.38	54.83	56.87	54.78	55.4933	11.14	25.6	17.26	18		hypothetical protein
gene00548	7.39	17.4	29.55	18.1133	24.05	23.67	25.41	24.3767	23.54	25.34	28.66	25.8467	5.86	22.86	20.83	16.5167		hypothetical protein
gene00549	18.84	26.68	29.58	25.0333	23.16	26.01	26.15	25.1067	27.95	28.11	26.96	27.6733	47.66	92.44	81.13	73.7433	KAT9	histone acetyltransferase ELP3
gene00550	8.25	21.61	31.25	20.37	18.4	15.85	16.57	16.94	18.22	15.51	15.03	16.2533	3.12	8.71	5.89	5.90667	MER3	P-loop containing nucleoside triphosphate hydrolase protein
gene00551	52.58	68.16	107.09	75.9433	113.97	109.9	103.75	109.207	94.39	91.65	82.96	89.6667	3.77	13.08	10.19	9.01333	ide	hypothetical protein
gene00552	25.49	45	46.77	39.0867	39.43	28.04	28.76	32.0767	37.01	36.01	37.57	36.8633	12.62	34.8	25.27	24.23	rpa	replication factor-a protein
gene00553	59.34	20.79	36.25	38.7933	33.69	37.79	31.16	34.2133	30.13	31.9	40.7	34.2433	6.42	17.56	15.19	13.0567		CKS-domain-containing protein
gene00554	7.19	13.23	17.44	12.62	12.29	9.55	10.03	10.6233	13.99	12.88	10.23	12.3667	2.7	7.81	4.86	5.12333		hypothetical protein
gene00555	339.06	402.52	362.88	368.153	340.92	282.63	337.25	320.267	456.29	421.21	415.63	431.043	234.28	407.81	370.34	337.477		RNA-binding domain-containing protein
gene00556	21.16	22.24	27.82	23.74	21.84	17.85	17.43	19.04	22.33	23.73	21.37	22.4767	4.17	10.88	9.6	8.21667		RNI-like protein
gene00557	79.12	98.26	97.49	91.6233	81.72	68.8	76.2	75.5733	84.06	75.95	63.72	74.5767	13.67	34.36	24.69	24.24		3-hydroxyisobutyryl-coenzyme A hydrolase isoform 1
gene00558	3.61	7.67	15.04	8.77333	6.77	4.81	2.05	4.54333	9.86	0	4.44	4.76667	11.35	14.86	5.66	10.6233		hypothetical protein
gene00559	95.11	128.37	162.71	128.73	139.48	124.44	124.72	129.547	114.88	116.63	115.97	115.827	27.21	74.89	52.82	51.64	iscS	cysteine desulfurase NFS1
gene00560	67.52	54.27	48.25	56.68	45.06	41.86	43.88	43.6	44.37	42.92	42.87	43.3867	19.5	41.1	34.08	31.56	cbhA	cellobiohydrolase II-I
gene00561	90.98	148.55	142.06	127.197	139.29	136.08	152.39	142.587	170.98	176.63	162.8	170.137	45.25	112.97	75.92	78.0467	CSN8	hypothetical protein
gene00562	29.31	41	46.82	39.0433	35.54	35.67	36.48	35.8967	33.97	33.37	27.16	31.5	5.5	16.52	15.99	12.67		HAD subfamily IIID h
gene00563	48.93	63.39	82.52	64.9467	81.97	102.68	72.74	85.7967	43.28	55.95	35.18	44.8033	1.47	5.19	3.7	3.45333		alpha/beta-hydrolase
gene00564	56.47	62.31	60.92	59.9	62.79	67.73	65.46	65.3267	60.7	74.3	88.08	74.36	16.46	42.61	83.15	47.4067		alpha/beta-hydrolase
gene00565	0.7	1.92	4.37	2.33	0.62	0.81	0.73	0.72	0.67	1.09	0.37	0.71	0.39	1.75	1.07	1.07		hypothetical protein
gene00566	292.18	319.76	347.03	319.657	307.13	284.09	332.39	307.87	413.08	381.78	385.42	393.427	210.68	383.86	299.09	297.877		hypothetical protein
gene00567	12.52	31.55	41.75	28.6067	51.38	50.1	58.46	53.3133	44.97	43.34	47.68	45.33	3.84	10.32	10.06	8.07333		YTH-domain-containing protein
gene00568	7.28	6.27	9.58	7.71	11.4	12.16	8.49	10.6833	12.07	12.94	8.23	11.08	9.43	22.49	13.94	15.2867		hypothetical protein
gene00569	50.73	77.24	78.9	68.9567	69.25	65.66	74.14	69.6833	42.61	46.53	35.96	41.7	18.19	24.16	12.11	18.1533		hypothetical protein
gene00570	68.31	79.59	81	76.3	76.82	70.2	73.93	73.65	59.55	57.39	57.17	58.0367	5.21	17.58	16.62	13.1367	LIS1	hypothetical protein
gene00571	9.57	47.55	29.59	28.9033	0	6.94	11.41	6.11667	14.35	17.8	25.06	19.07	2.93	9.88	2.4	5.07	METTL19	DUF1613-domain-containing protein
gene00572	12.53	19.21	23.81	18.5167	19.46	16.56	20.77	18.93	19.97	20.09	17.82	19.2933	4.14	13.18	11.43	9.58333		nuclear protein
gene00573	230.3	252.06	243.4	241.92	279.97	268.61	287.31	278.63	282.6	260.8	270.95	271.45	33.99	89.76	84	69.25		actin-related protein ARPC3
gene00574	235.17	143.79	111.32	163.427	105.21	89.07	90.89	95.0567	82.2	69.12	51.37	67.5633	18.84	60.85	48.06	42.5833		hypothetical protein
gene00575	11.07	15.03	13.16	13.0867	11.19	9.25	9.91	10.1167	13.57	12.36	9.03	11.6533	2.06	5.08	4.15	3.76333		hypothetical protein
gene00576	66.27	77.94	95.85	80.02	63.28	78.8	61.07	67.7167	61.28	45.76	43.71	50.25	12.13	26.8	19.43	19.4533		hypothetical protein
gene00577	725.58	326.4	279.22	443.733	220.95	236.89	233.99	230.61	151.02	158.27	168.29	159.193	25.96	52.59	56.45	45	ribH	dimethylribityllumazine synthase
gene00578	31.11	48.03	55.1	44.7467	45.41	49.37	48.2	47.66	47.46	44.18	36.59	42.7433	12.58	37.05	30.35	26.66		hypothetical protein
gene00579	102.99	163.35	165.73	144.023	134.28	123.96	157.56	138.6	166.98	148.91	150.88	155.59	18.24	45.86	36.12	33.4067	chaA	calcium/proton exchanger
gene00580	52.34	70.05	81.81	68.0667	67.84	59.63	62.11	63.1933	68.67	58.06	60.7	62.4767	5.23	14.7	12.18	10.7033	UFD3	PFU-domain-containing protein
gene00581	48.05	31.72	32.65	37.4733	32.31	27.37	33.11	30.93	25.53	29.68	26.15	27.12	1.43	3.31	3	2.58		hypothetical protein
gene00582	35.84	50.09	61.84	49.2567	47.09	43.34	41.42	43.95	49.28	46.8	37.86	44.6467	7.29	20.06	16.47	14.6067		SAPS-domain-containing protein
gene00583	37.83	27.35	23.28	29.4867	25.81	21.38	22.67	23.2867	23.18	18.48	14.97	18.8767	12.41	24.85	20.57	19.2767		hypothetical protein
gene00584	68.12	147.57	152.26	122.65	102.84	74.94	59.72	79.1667	54.16	38.47	37.02	43.2167	6.57	16.71	9.06	10.78		hypothetical protein
gene00585	21.13	39.61	45.08	35.2733	30.05	22.7	23.22	25.3233	29.49	25.29	24.09	26.29	4.41	13.08	9.37	8.95333	CDC47	MCM-domain-containing protein
gene00586	301.19	273	239.56	271.25	230.73	189.35	220.7	213.593	181.37	164.96	158.11	168.147	27.91	59.57	56.58	48.02	TRS23	transport protein particle complex subunit
gene00587	19.61	32.28	30.67	27.52	27.96	22.91	22.52	24.4633	25.14	19.52	16.32	20.3267	13.95	25.41	19.93	19.7633	bkdA2	pyruvate dehydrogenase
gene00588	165.64	107.03	104.96	125.877	70.29	68.28	78.38	72.3167	91.9	86.04	87.11	88.35	117.73	160.04	147.71	141.827		hypothetical protein
gene00589	62	60.55	64.5	62.35	57.71	55.11	57.76	56.86	54.18	49.46	46.75	50.13	12.17	29.72	27.42	23.1033		hypothetical protein
gene00590	52.4	29	19.31	33.57	28.37	36.58	23.13	29.36	15.06	13.49	15.32	14.6233	4.1	6.48	6.4	5.66		Aldo/keto reductase
gene00591	27.49	34.85	33.76	32.0333	28.26	36.82	55.17	40.0833	35.49	35.57	61.76	44.2733	7.68	20.93	26.26	18.29		aminotransferase
gene00592	11.25	20	22.99	18.08	19.97	20.31	20.18	20.1533	20.25	21.3	19.58	20.3767	3.86	12.05	8.12	8.01	AGO	Piwi-domain-containing protein
gene00593	25.82	48.7	83.29	52.6033	76.89	76.32	73.69	75.6333	103.48	109.56	101.55	104.863	10.53	23.78	19.03	17.78		kinesin-domain-containing protein
gene00594	29.95	34.4	39.97	34.7733	29.67	24.42	27.29	27.1267	29.86	25.3	21.78	25.6467	5.62	16.45	14.6	12.2233	metF	MTHFR-domain-containing protein
gene00595	52.42	92.24	102.98	82.5467	104.53	70.75	76.73	84.0033	130.27	128.05	141.35	133.223	68.86	158.09	168.76	131.903	ilvB	acetolactate synthase
gene00596	32.39	39.45	54.06	41.9667	45.14	37.93	36.6	39.89	42.75	39.02	35.86	39.21	4.96	11.67	7.69	8.10667		hypothetical protein
gene00597	50.79	63.82	39.4	51.3367	49.09	37.49	49.31	45.2967	18.6	24.15	33.95	25.5667	0	1.21	2.08	1.09667		hypothetical protein
gene00598	5.91	11.8	25.58	14.43	19.18	15.3	15.35	16.61	19.91	18.94	14.34	17.73	1.67	4.92	3.23	3.27333		hypothetical protein
gene00599	88.65	45.27	69.31	67.7433	38.19	12.3	44.64	31.71	84.53	38.03	63.8	62.12	16.47	33.01	45.29	31.59		hypothetical protein
gene00600	31.48	33.56	37.84	34.2933	29.45	27.15	30.35	28.9833	36.41	33.02	27.7	32.3767	35.72	60.95	57.55	51.4067	TRF4	Nucleotidyltransferase
gene00601	9.35	17.61	27.64	18.2	23.69	19.74	17.87	20.4333	27.55	22.64	19.57	23.2533	5.41	13.39	10.25	9.68333	dcm	S-adenosyl-L-methionine-dependent methyltransferase
gene00602	22.36	56.82	84.98	54.72	68.83	64.45	66.18	66.4867	74.98	70.34	62.18	69.1667	12.39	32.98	21.84	22.4033	RENT1	ATP dependent helicase
gene00603	29.13	23.06	16.93	23.04	12.27	12.57	9.41	11.4167	6.12	7.86	5.87	6.61667	4.96	9.49	9.24	7.89667		hypothetical protein
gene00604	32.51	7	11.09	16.8667	9.29	1.98	6.92	6.06333	8.03	6.48	10.12	8.21	3.56	15.84	11.56	10.32		hypothetical protein
gene00605	8.7	16.95	20.5	15.3833	18.27	16.97	19.57	18.27	16.4	19.52	16.23	17.3833	2.19	7.8	6.21	5.4		phosphate permease
gene00606	142.96	99.06	100.9	114.307	472.91	716.83	683.68	624.473	178.27	190.98	221.45	196.9	6.33	23.29	8.12	12.58		phosphate permease
gene00607	50.95	92.17	108.35	83.8233	129.07	91.62	89.53	103.407	126.57	114.05	115.72	118.78	101.4	179.69	148.99	143.36	leuA	2-isopropylmalate synthase
gene00608	29.67	44.65	56.32	43.5467	49.29	40.25	43.73	44.4233	46.32	40.92	35.55	40.93	6.86	17.92	13.36	12.7133		APG9-domain-containing protein
gene00609	30.08	45.42	63.55	46.35	64.58	54.86	60.55	59.9967	58.01	54.25	46.87	53.0433	11.25	27.23	22.11	20.1967		kinase-like protein
gene00610	3.23	9.77	12.26	8.42	9.26	7.91	7.99	8.38667	10.54	11.17	9.66	10.4567	0.78	3.4	1.83	2.00333		hypothetical protein
gene00611	53.58	46.47	50.64	50.23	41.85	30.57	39.01	37.1433	53.94	51.8	44.45	50.0633	10.23	28.29	20.04	19.52		Choline/ethanolaminephosphotransferase
gene00612	442.19	932.21	1044.95	806.45	927.96	652.19	822.67	800.94	810.1	725.07	708.29	747.82	150.75	318.89	209.67	226.437	ATP2	ATP synthase F1, beta subunit
gene00613	271.78	334.04	315.26	307.027	235.28	168.5	193.31	199.03	214.11	171.96	204.93	197	94.38	202.1	189.29	161.923		hypothetical protein
gene00614	554.72	650.78	491.32	565.607	508.55	445.81	547.2	500.52	469.86	443.77	461.51	458.38	87.44	210.49	183.47	160.467		cytochrome c oxidase subunit V
gene00615	1302.87	619.12	358.34	760.11	542.26	407.98	521.86	490.7	411.25	341.1	461.14	404.497	297.05	478.6	381.78	385.81	ATP15	hypothetical protein
gene00616	17.75	18.98	13.96	16.8967	16.6	28.62	44.23	29.8167	7.54	13.32	32.35	17.7367	4.86	14.52	18.63	12.67		S-adenosyl-L-methionine-dependent methyltransferase
gene00617	35.56	43.78	35.89	38.41	31.29	32.03	36.29	33.2033	29.99	32.38	31.29	31.22	13.11	20.94	20.8	18.2833		ras-domain-containing protein
gene00618	270.87	378.83	421.79	357.163	416.72	385.16	421.36	407.747	382.41	358.16	352.84	364.47	37.31	103.94	74.69	71.98		DEAD-domain-containing protein
gene00619	73.73	102.5	124.84	100.357	95.07	76.33	84.52	85.3067	89.79	81.94	75.41	82.38	24.64	58.57	41.78	41.6633		Glycosyltransferase Family 39 protein
gene00620	9.44	40.11	64.39	37.98	50.12	41.83	43.73	45.2267	49.88	45.06	40.91	45.2833	3.32	11.04	7.26	7.20667	UBP3	cysteine proteinase
gene00621	13.54	28.13	30.54	24.07	28.07	29.14	27.2	28.1367	32.44	26.19	23.72	27.45	5.92	19.79	23.29	16.3333		hypothetical protein
gene00622	134.68	201.82	221.76	186.087	209.61	164.31	221.92	198.613	184.5	186.19	183.02	184.57	18.62	56.45	47.69	40.92		Prefoldin
gene00623	31.72	51.88	70	51.2	52.43	43.35	44.29	46.69	56.32	51.44	50.56	52.7733	6.1	18.48	13.61	12.73		P-loop containing nucleoside triphosphate hydrolase protein
gene00624	10.74	24.27	36.79	23.9333	38.23	38.6	43.07	39.9667	39.85	35.61	35.48	36.98	4.17	14.07	9.72	9.32		hypothetical protein
gene00625	36.6	25.6	26.5	29.5667	39.21	40.07	37.95	39.0767	50.49	51.1	44.95	48.8467	4.86	10.86	11.97	9.23		P-loop containing nucleoside triphosphate hydrolase protein
gene00626	34.79	25.97	29.46	30.0733	22.14	24.7	19.8	22.2133	27.32	32.53	28.91	29.5867	4.12	10.18	7.77	7.35667		hypothetical protein
gene00627	13.91	32.75	40.86	29.1733	37.89	28.18	29.24	31.77	34.16	29.57	29.14	30.9567	6.73	16.05	9.14	10.64		hypothetical protein
gene00628	32.44	30.52	37.03	33.33	28.62	26.14	26	26.92	38.28	32.95	23.46	31.5633	16.01	40.47	31.26	29.2467	SLM3	5-methylaminomethyl-2-thiouridylate-methyltransferase
gene00629	13.67	16.35	23.06	17.6933	12.42	6.5	7.9	8.94	11.88	11	10.01	10.9633	2.25	5.54	3.57	3.78667	CHL12	P-loop containing nucleoside triphosphate hydrolase protein
gene00630	45.93	40.67	29.63	38.7433	38.43	80.27	52.31	57.0033	54.03	82.29	71.65	69.3233	3.37	6.6	3.75	4.57333		MFS general substrate transporter
gene00631	24.62	64.71	80.25	56.5267	64.76	53.48	58.25	58.83	73.5	70.24	60.69	68.1433	7.36	19.39	13.78	13.51		WD40 repeat-like protein
gene00632	0	0	0	0	0	0	0	0	0	0	0	0	0	0	0	0		tRNA-Leu
gene00633	34.1	69	129.58	77.56	113.16	80.85	81.6	91.87	114.65	99.44	94.32	102.803	10.42	27.43	18.97	18.94		WD40 repeat-like protein
gene00634	26.97	43.08	45.8	38.6167	30.46	25.07	31.6	29.0433	27.59	29.81	30.39	29.2633	3.76	11.98	8.71	8.15		exonuclease
gene00635	42.33	69.06	111.16	74.1833	106.15	94.1	75.95	92.0667	104.22	98.77	65.6	89.53	15.99	47.02	32.94	31.9833		hypothetical protein
gene00636	9.06	25.51	30.87	21.8133	23.53	27.4	24.07	25	34.43	31.23	28.18	31.28	1.66	5.04	4	3.56667		DUF974-domain-containing protein
gene00637	47.09	86.35	87.98	73.8067	73.76	69.02	85.48	76.0867	84.81	74.8	80.26	79.9567	13.51	34.22	28.78	25.5033		ATPase, V1 complex, subunit H
gene00638	116.17	111.25	120.35	115.923	80.81	57.66	68.95	69.14	86.55	64.42	66.65	72.54	73.56	127.3	124.75	108.537		hypothetical protein
gene00639	123.6	120.52	123.31	122.477	108.5	83.74	98.71	96.9833	99.26	91.78	82.28	91.1067	21.27	45.04	35.32	33.8767	dld	D-lactate dehydrogenase cytochrome oxidoreductase
gene00640	38.01	35.91	36.16	36.6933	32.76	32	33.69	32.8167	28.14	28.87	25.22	27.41	14.05	32.82	27.52	24.7967		hypothetical protein
gene00641	19.39	30.74	47.09	32.4067	37.71	32.1	32.76	34.19	36.19	33.75	31.32	33.7533	4.16	11.68	9.9	8.58		tubulin-domain-containing protein
gene00642	5.08	7.44	7.66	6.72667	7.71	5.69	6.62	6.67333	7.95	8.45	9.41	8.60333	0.71	2.5	0.96	1.39		hypothetical protein
gene00643	26.09	31.38	34.22	30.5633	33.34	28.63	27.76	29.91	29.66	27.06	24.33	27.0167	3.95	10.68	9.71	8.11333		Metallo-dependent phosphatase
gene00644	334.07	283.78	307.45	308.433	231.11	190.71	159.75	193.857	195.77	156.79	141.74	164.767	74.92	128.24	135.56	112.907		hypothetical protein
gene00645	4.62	7.27	7.08	6.32333	5.56	6.54	4.5	5.53333	6.94	7.31	6.62	6.95667	1.57	3.75	3.42	2.91333		DEAD/H helicase
gene00646	2.15	6.37	8.86	5.79333	6.59	6.34	6.48	6.47	8.3	7.23	6.26	7.26333	0.56	1.92	1.41	1.29667		kinase-like protein
gene00647	114.84	95.77	110.72	107.11	77.64	79.95	81.28	79.6233	90.39	99.38	91.44	93.7367	18.37	46.62	31.25	32.08		hypothetical protein
gene00648	45.97	31.02	30.02	35.67	27.35	22.32	29.13	26.2667	34.41	29.13	30.75	31.43	38.81	46.5	42.1	42.47	mmsB	3-hydroxyisobutyrate dehydrogenase
gene00649	52.41	84.75	99.1	78.7533	122.35	133.86	143.41	133.207	111.64	113.18	102.92	109.247	12.58	28.4	19.81	20.2633		hypothetical protein
gene00650	89.16	64.34	69.96	74.4867	52.03	52.59	60.02	54.88	57.24	49.26	44.72	50.4067	45.43	93.33	83.12	73.96		CDK-activating kinase assembly factor
gene00651	157.22	140.88	142.69	146.93	115.28	139.82	126.85	127.317	110.68	123.13	127.39	120.4	22.6	50.95	39.02	37.5233		Extradiol aromatic ring-opening dioxygenase
gene00652	102.84	93.57	78.64	91.6833	70.89	57.7	65.93	64.84	75.31	66.4	69.24	70.3167	16.51	35.75	24.8	25.6867		Scramblase-domain-containing protein
gene00653	87.3	67.12	65.61	73.3433	60.88	57.05	60.95	59.6267	72.26	70.4	66.74	69.8	10.43	20.25	17	15.8933	gloB	hydroxyacylglutathione hydrolase
gene00654	397.83	146.81	132.84	225.827	40.93	46.52	61.99	49.8133	32	13.47	0	15.1567	0	0	4.91	1.63667		hypothetical protein
gene00655	170.2	204.27	198.57	191.013	176.02	178.38	206.18	186.86	218.18	216.94	202.66	212.593	32.22	89.87	74.13	65.4067		SFT2-domain-containing protein
gene00656	30.45	70.59	115.94	72.3267	127.63	115.28	109.18	117.363	116.14	102.43	88.95	102.507	13.71	27.23	22.73	21.2233		hypothetical protein
gene00657	33.45	52.62	68.45	51.5067	59.14	59.34	51.48	56.6533	75.31	74.36	63.22	70.9633	10.13	25.11	15.8	17.0133	XAB2	protein prenylyltransferase
gene00658	27.8	42.88	47.24	39.3067	69.4	118.5	97.04	94.98	117.49	111.37	85.09	104.65	21.24	77.03	46.42	48.23		WD40 repeat-like protein
gene00659	293.61	380.65	344.32	339.527	438.68	459.37	435.15	444.4	383.45	369.71	384.61	379.257	17.08	41.48	34.04	30.8667		2-nitropropane dioxygenase
gene00660	154.31	112.5	108.93	125.247	99.77	82.04	126.65	102.82	78.94	71.24	52.9	67.6933	18.45	63.24	47.29	42.9933		hypothetical protein
gene00661	0	0	0	0	0	0	0	0	0	0	0	0	0	0	0	0		hypothetical protein
gene00662	0	0	0	0	0	0	0	0	0	0	0	0	0	0	0	0		hypothetical protein
gene00663	0	0	0	0	0	0	0	0	0	0	0	0	0	0	0	0		hypothetical protein
gene00664	0	0	0	0	0	0	0	0	0	0	0	0	0	0	0	0		hypothetical protein
gene00665	27.85	29.53	33.48	30.2867	23.81	19.46	22.57	21.9467	24.9	25.25	22.96	24.37	11.86	30.02	24.73	22.2033		cytochrome c and c1 heme-lyase
gene00666	21.32	44.51	45.7	37.1767	46.65	43.9	45.78	45.4433	57.42	58.76	59.45	58.5433	7.98	23.11	15.6	15.5633		Pkinase-domain-containing protein
gene00667	10	11.52	13.03	11.5167	15.43	13.83	16.81	15.3567	13.99	16.4	20.33	16.9067	8.26	19.68	23.51	17.15		DUF1671-domain-containing protein
gene00668	1.71	1.03	1.28	1.34	0.9	1.75	1.28	1.31	1.3	2.29	2.78	2.12333	0.16	1.6	1.08	0.946667		hypothetical protein
gene00669	11.38	16.44	17.23	15.0167	15.14	18.55	19.36	17.6833	19.07	15.62	16.23	16.9733	4.87	13.42	9.07	9.12		hypothetical protein
gene00670	97.31	80.19	91.58	89.6933	99.49	98.9	95.33	97.9067	91.48	92.37	83.72	89.19	20.26	47.36	38.15	35.2567	purA	Adenylosuccinate synthetase
gene00671	19.57	33.12	42	31.5633	40.77	38.4	33.07	37.4133	48.38	46.54	42.14	45.6867	9.22	26.94	15.02	17.06		hypothetical protein
gene00672	96.04	89.16	85.61	90.27	62.07	50.86	64.55	59.16	61.91	56.47	54.24	57.54	18.94	38.79	33.14	30.29	RRP3	DEAD-domain-containing protein
gene00673	3217.21	4069.49	3287.16	3524.62	2559.62	2307.23	2617.81	2494.89	1898	2137.39	2450.58	2161.99	720.42	1241.31	1118.75	1026.83	ATP18	ATPase, F0 complex, subunit J
gene00674	20.57	33.65	35.4	29.8733	25.48	25.2	25.73	25.47	28.19	25.24	25.66	26.3633	4.84	13.59	9.47	9.3		glycosyltransferase family 58 protein
gene00675	15.99	18.25	16.37	16.87	14.2	8.21	15.89	12.7667	11.32	9.38	8.77	9.82333	3.64	9.02	7.96	6.87333		putative efflux transporter
gene00676	7.87	6.32	8.84	7.67667	4.38	4.69	2.98	4.01667	2.42	3.08	1.65	2.38333	5.7	6.17	3.06	4.97667		Aldo/keto reductase
gene00677	5.36	6.3	8.15	6.60333	5.68	3.63	8.3	5.87	7.63	6.34	7.44	7.13667	2.03	3.76	2.75	2.84667	ECO1	hypothetical protein
gene00678	110.21	173.2	213.58	165.663	169.6	162.89	162.64	165.043	161.83	157.89	175.91	165.21	30.04	64.22	43.8	46.02		glycoside hydrolase
gene00679	265.54	178.68	152.06	198.76	141.8	217.86	247.58	202.413	215.64	194.98	302.63	237.75	42.5	61.27	57.32	53.6967		hypothetical protein
gene00680	111.18	138.43	132.6	127.403	132.71	111.42	125.07	123.067	130.73	125.96	124.23	126.973	9.87	18.6	14.83	14.4333		Creatinase/aminopeptidase
gene00681	5879.86	5230.23	4727.76	5279.28	98.34	286.78	427.76	270.96	358.99	417.93	597.77	458.23	13.12	32.61	19.59	21.7733		mismatched base pair and cruciform DNA recognition protein
gene00682	99.33	57.37	51.17	69.29	38.1	62.05	43.98	48.0433	30.84	29.64	44.92	35.1333	22.61	40.26	39.33	34.0667		hypothetical protein
gene00683	32.49	44.75	43.01	40.0833	56.34	51.79	50.37	52.8333	57.26	54.72	46.2	52.7267	4.42	10.77	6.65	7.28		ARM repeat-containing protein
gene00684	16.73	33.71	34.31	28.25	36.31	37.97	37.9	37.3933	32.54	26.72	21.95	27.07	1.69	7.4	5.96	5.01667		hypothetical protein
gene00685	13.98	11.34	12.64	12.6533	8.54	11.2	12.44	10.7267	12.93	9.02	8.64	10.1967	2.66	5.63	3.89	4.06		FMN-linked oxidoreductase
gene00686	163.11	126.23	140.72	143.353	107.67	84.79	108.36	100.273	89.31	79.19	79.78	82.76	23.61	55.67	47.02	42.1	pdhA	mitochondrial pyruvate dehydrogenase E1 component beta subunit
gene00687	100.88	120.06	124.72	115.22	90.27	81.33	97.25	89.6167	107.5	94.59	97.4	99.83	44.02	93.16	75.64	70.94	SCD6	hypothetical protein
gene00688	131.41	66.84	62.51	86.92	52.15	51.46	55.09	52.9	47.94	42.17	41.31	43.8067	37.55	50.55	46.18	44.76		hypothetical protein
gene00689	129.75	169.3	96.46	131.837	228.37	271.85	248.12	249.447	202.29	252.46	231.86	228.87	10.84	46.69	27.88	28.47		hypothetical protein
gene00690	27.94	20.8	15.44	21.3933	43.91	61.3	58.41	54.54	21.26	22.96	20.84	21.6867	6.37	13.41	8.61	9.46333		hypothetical protein
gene00691	58.54	86.86	89.78	78.3933	83.7	79.05	87.59	83.4467	79.58	68.36	67.88	71.94	37.4	90.04	81.74	69.7267		hypothetical protein
gene00692	10.29	18.35	29.16	19.2667	25.71	19.62	21.31	22.2133	26.66	24.42	21.93	24.3367	3.76	9.89	6.49	6.71333	PEP5	hypothetical protein
gene00693	30.68	31.17	48.74	36.8633	28.89	32.16	33.44	31.4967	28.98	33.35	37.46	33.2633	5.52	13.98	12.24	10.58		TPR-like protein
gene00694	19.55	47.07	50.98	39.2	57.98	53.36	50.94	54.0933	67.83	57.18	54.45	59.82	5	14.73	12.05	10.5933		hypothetical protein
gene00695	55.36	65.93	72.96	64.75	54.57	48.25	45.6	49.4733	51.45	49.07	39.57	46.6967	12.53	33.02	24.8	23.45	CUS1	DUF382-domain-containing protein
gene00696	0	0	0	0	0	0	0	0	0	0	0	0	0	0	0	0		tRNA-Ser
gene00697	0	0	0	0	0	0	0	0	0	0	0	0	0	0	0	0		tRNA-Ser
gene00698	21.95	21.99	20.03	21.3233	15.8	11.98	13.79	13.8567	17.35	16.37	15.47	16.3967	3.75	10.83	9.19	7.92333	HERB	cleavage/polyadenylation factor ia subunit Clp1p
gene00699	78.92	110.18	118.78	102.627	77.42	64.23	77.02	72.89	85.55	75.89	89.81	83.75	8.84	35.28	57.16	33.76	ndh	nucleotide-binding domain-containing protein
gene00700	150.18	198.49	196.6	181.757	170.36	136.84	165.84	157.68	220.31	185.3	209.24	204.95	17.97	39.74	38.91	32.2067	RPN6	proteasome regulatory particle subunit
gene00701	152.38	240.83	246.47	213.227	246.54	213.66	240.61	233.603	330.33	306.55	330.05	322.31	23.88	66.54	49.79	46.7367	RPN8	Mov34-domain-containing protein
gene00702	92.35	191.53	213.92	165.933	143.25	117.66	142.45	134.453	170.59	168.44	161.36	166.797	26.82	67.06	44.85	46.2433	UBC11	ubiquitin-conjugating enzyme
gene00703	12.61	33.33	58.58	34.84	46.99	42.21	47.44	45.5467	49.42	46.31	44.27	46.6667	3.91	11.83	8.77	8.17		hypothetical protein
gene00704	24.41	28.81	38.45	30.5567	57.46	60.98	29.24	49.2267	102.08	120.82	128.57	117.157	0.21	1.26	1.07	0.846667		heme-thiolate peroxidase
gene00705	16.7	22.05	24.2	20.9833	21.84	17.87	18.41	19.3733	23.06	22.52	24.05	23.21	5.98	14.14	12.98	11.0333	DBP6	DEAD-domain-containing protein
gene00706	55.06	16.75	15.2	29.0033	75.31	99.36	45.54	73.4033	117.22	73.88	62.54	84.5467	8.3	36.37	58.99	34.5533		translation machinery associated TMA7
gene00707	68.95	92.14	83.24	81.4433	156.16	120.61	134.39	137.053	54.22	67.71	104.89	75.6067	20.39	27.1	25.65	24.38		hypothetical protein
gene00708	15.56	16.84	17.78	16.7267	19.38	15.15	14.53	16.3533	12.72	11.21	11.02	11.65	2.09	3.81	4.34	3.41333		hypothetical protein
gene00709	39.2	59.98	46.79	48.6567	47.62	44.61	44.01	45.4133	39.6	34.15	25.74	33.1633	13.54	32.91	27.39	24.6133		hypothetical protein
gene00710	7.14	18.28	45.31	23.5767	32.78	26.79	28.35	29.3067	37.59	34.59	29.14	33.7733	2.37	6.71	4.8	4.62667	NOT1	Not1-domain-containing protein
gene00711	75.64	105.39	105.12	95.3833	84.91	70.08	77.77	77.5867	83.92	69.88	63.15	72.3167	57.06	100.8	67.83	75.23		general substrate transporter
gene00712	5.92	4.48	2.54	4.31333	2.36	4.07	4.05	3.49333	2.55	6.19	3.29	4.01	3.57	10.12	7.47	7.05333		hypothetical protein
gene00713	0.21	0.25	0.29	0.25	0.43	0.3	0.31	0.346667	0.5	0.38	0.4	0.426667	0.06	0.25	0.25	0.186667		hypothetical protein
gene00714	37.12	32.86	33.94	34.64	26.99	24.59	26.03	25.87	28.09	26.89	23.25	26.0767	33.27	56.96	37.67	42.6333	rtcA	RNA 3'-terminal phosphate cyclase
gene00715	123.57	156.9	179.69	153.387	145.59	144.64	162.14	150.79	173.05	170.82	171.45	171.773	45.1	94.04	76	71.7133		transcription regulator
gene00716	10.56	12.33	8.25	10.38	9.05	5.31	8.7	7.68667	10.15	4.57	5.51	6.74333	3.43	3.48	4.91	3.94		hypothetical protein
gene00717	16.15	24.4	32.29	24.28	24.02	16.14	16.81	18.99	28.24	28.06	23.78	26.6933	3.72	9.6	6.27	6.53		MCM-domain-containing protein
gene00718	18.92	30.81	46.44	32.0567	33.97	33.06	31.04	32.69	38.48	37.67	30.41	35.52	3.52	10.87	8.23	7.54		hypothetical protein
gene00719	48.03	48.15	62.2	52.7933	85.07	126.62	86.26	99.3167	86.48	91.21	103.46	93.7167	2.47	6.55	5.72	4.91333		hypothetical protein
gene00720	6.04	11.82	13.56	10.4733	8.5	5.87	5.97	6.78	8.33	7.86	8.78	8.32333	0.71	2.66	2.31	1.89333		hypothetical protein
gene00721	12.3	29.67	56.47	32.8133	30.79	26.91	24.61	27.4367	31.4	26.65	24.89	27.6467	2.34	9.13	5.18	5.55		Sec7-domain-containing protein
gene00722	20.99	36.47	54.22	37.2267	39.1	36.23	36.38	37.2367	43.94	39.32	33.52	38.9267	6.15	23.2	17.4	15.5833		HOOK-domain-containing protein
gene00723	13.54	18.13	35.73	22.4667	27.51	24.35	25.66	25.84	27.12	36.39	24.74	29.4167	1.63	3.79	2.31	2.57667		hypothetical protein
gene00724	1.61	1.13	2.77	1.83667	3.48	2.62	2.85	2.98333	2.91	3.86	3.76	3.51	1.82	4.89	3.73	3.48		P-loop containing nucleoside triphosphate hydrolase protein
gene00725	1.02	2.65	2.29	1.98667	3.64	3.05	3.27	3.32	7.75	4.34	3.62	5.23667	0.1	0.18	0.52	0.266667		hypothetical protein
gene00726	50.27	49.1	47.09	48.82	48.59	50.61	48.08	49.0933	52.14	40.01	36.7	42.95	12.05	23.14	16.54	17.2433		hypothetical protein
gene00727	265.55	276.94	188.48	243.657	262.88	299.26	355.46	305.867	366.48	329.68	387.99	361.383	74.99	157.39	147.12	126.5	LC3	light chain 3
gene00728	27.29	38.46	59.03	41.5933	35.12	33.07	37.91	35.3667	29.91	31.37	28.71	29.9967	2.98	8.52	6.69	6.06333		MFS general substrate transporter
gene00729	18.89	31.81	42.58	31.0933	31.12	27.75	26.95	28.6067	41.78	37.58	30.75	36.7033	5.07	15.66	8.51	9.74667		glycoside hydrolase family 63 protein
gene00730	50.86	34.02	36.03	40.3033	27.94	32.25	31.81	30.6667	42.03	41.9	35.75	39.8933	51.98	110.46	92.06	84.8333		hypothetical protein
gene00731	72.89	129.12	152.94	118.317	151.24	146.39	142.02	146.55	161.13	162.11	148.19	157.143	12.9	31.85	26.17	23.64		CMGC/GSK protein kinase
gene00732	102.25	129.35	149.44	127.013	80.93	78.92	82.53	80.7933	74.57	83.99	69.29	75.95	30.18	61.76	43.55	45.1633		WD40 repeat-like protein
gene00733	23.93	29.61	38.37	30.6367	36.59	34.68	29.87	33.7133	38.95	42.89	32.37	38.07	10.61	26.16	21.18	19.3167		hypothetical protein
gene00734	3.24	2.27	4.25	3.25333	2.33	1.95	1.21	1.83	2.52	2.77	1.5	2.26333	1.2	2.01	0.74	1.31667		hypothetical protein
gene00735	15.71	21.09	20.32	19.04	20.59	13.93	18.38	17.6333	15.48	11.81	11.98	13.09	3.52	9.12	6.32	6.32		Arabinanase/levansucrase/invertase
gene00736	77.04	30.69	25.91	44.5467	19.7	19.58	19.2	19.4933	15.27	15.22	13.65	14.7133	11.35	19.22	17.11	15.8933		hypothetical protein
gene00737	34.23	42.46	56.1	44.2633	54.49	50.82	49.71	51.6733	55.16	51.23	46.15	50.8467	7.55	19.18	13.63	13.4533		hypothetical protein
gene00738	50.55	78.43	76.02	68.3333	138.11	154.91	160.76	151.26	89.33	81.09	77.76	82.7267	4.74	15.34	11.54	10.54		bifunctional 6-phosphofructo-2-kinase/fructose-2,6-bisphosphate 2-phosphatase
gene00739	11.04	10.27	11.67	10.9933	10.15	6.19	8.36	8.23333	8.67	8.01	8.39	8.35667	1.49	4.59	3.16	3.08	miaA	tRNA isopentenyltransferase
gene00740	0.18	0.44	0.2	0.273333	0.49	0.4	0.06	0.316667	0.79	0.65	1.46	0.966667	0.37	0.35	0.23	0.316667		hypothetical protein
gene00741	109.08	112.54	116.57	112.73	73.18	53.02	71.48	65.8933	77.4	70.7	69.58	72.56	4.34	21.19	15	13.51		signal transducer
gene00742	77.96	45.68	45.17	56.27	21.19	23.14	22.98	22.4367	25.62	24.49	25.22	25.11	14.11	27.14	26.72	22.6567		PRP38-domain-containing protein
gene00743	3.98	4.86	9.32	6.05333	11.17	6.05	4.79	7.33667	10.05	9.5	6.18	8.57667	3.35	9.74	4.29	5.79333		hypothetical protein
gene00744	44.99	44.75	51.71	47.15	30.62	25.86	30.82	29.1	29.45	22.39	26.6	26.1467	10.72	20.4	19.82	16.98	rplO	ribosomal protein L15
gene00745	14.79	41.08	84.54	46.8033	78.46	73.89	74.6	75.65	97.95	90.61	75.7	88.0867	9.31	24.69	18.99	17.6633		hypothetical protein
gene00746	238.7	187.37	188.65	204.907	121.86	99.98	102.82	108.22	119.18	108.2	106.45	111.277	174.53	269.89	273.89	239.437	NOLA1	Gar1-domain-containing protein
gene00747	8	11.36	14.28	11.2133	10.56	10.08	10.34	10.3267	12.66	12.24	10.15	11.6833	4.62	10	7.57	7.39667	PXAAA1	AAA-domain-containing protein
gene00748	3.28	7.07	15.96	8.77	9.59	6.18	7.12	7.63	10.05	8.61	7.54	8.73333	0.93	3.29	1.93	2.05		hypothetical protein
gene00749	42.21	107.33	130.99	93.51	87.7	81.48	94.08	87.7533	91.36	89.96	94.93	92.0833	14.27	39.07	38.5	30.6133	phoD	hypothetical protein
gene00750	7.75	3.76	5.03	5.51333	2.31	1.23	1.07	1.53667	1.25	4.03	7.98	4.42	18.86	41.11	36.83	32.2667		hypothetical protein
gene00751	351.42	216.53	161.31	243.087	146.66	150.16	147.09	147.97	144.61	136.69	146.83	142.71	111.54	201.77	207.87	173.727		DUF572-domain-containing protein
gene00752	64.95	71.29	71.91	69.3833	53.27	47.21	48.98	49.82	64.46	60.85	65.26	63.5233	31.43	52.54	41.9	41.9567		hypothetical protein
gene00753	37	44.71	47.74	43.15	37.58	35.37	30.92	34.6233	41.94	35.73	38.06	38.5767	8.29	22.66	16.6	15.85		hypothetical protein
gene00754	31.78	58.32	42.47	44.19	125	154.2	154.89	144.697	182.13	93.06	135.98	137.057	2.66	2.02	2.25	2.31		hypothetical protein
gene00755	8.98	11.47	10.2	10.2167	8.2	6.93	6.84	7.32333	9.62	8.46	7.91	8.66333	8.08	12.64	10.03	10.25		hypothetical protein
gene00756	51.17	66.38	70.68	62.7433	60.7	62.78	62.31	61.93	69.6	66.21	67.05	67.62	16.8	38.7	33.82	29.7733	CEF1	hypothetical protein
gene00757	75.17	78.77	80.78	78.24	64.41	57.93	60.44	60.9267	67.31	65.21	57.64	63.3867	23.36	63.25	50.83	45.8133		hypothetical protein
gene00758	14.49	19.43	23.14	19.02	13.83	16.39	16.56	15.5933	19.66	20.17	20.02	19.95	5.23	12.92	8.87	9.00667		predicted protein
gene00759	0	0	0	0	0	0	0	0	0	0	0	0	0	0	0	0		hypothetical protein
gene00760	0	0	0	0	0	0	0	0	0	0	0	0	0	0	0	0		hypothetical protein
gene00761	47.77	76.65	98.79	74.4033	84.26	80.23	75.94	80.1433	89.88	91.41	84.66	88.65	8.2	19.88	14.8	14.2933		JmjC domain-containing histone demethylation protein 1
gene00762	36.45	33.49	45.55	38.4967	23.84	21.48	20.45	21.9233	21.1	21.29	19.44	20.61	5.74	12.44	10.5	9.56		hypothetical protein
gene00763	10.32	15.54	19.44	15.1	11.77	12.37	11.82	11.9867	15.63	12.87	10.37	12.9567	3.07	7.69	5.89	5.55	GPI1	Gpi1-domain-containing protein
gene00764	154.97	196.23	216.84	189.347	195.05	170.62	202.82	189.497	207.37	203.48	204.16	205.003	28.83	66.04	59.59	51.4867	ATP6A	V-type ATPase
gene00765	9.98	16.67	18.98	15.21	18.84	17.78	17.78	18.1333	19.4	22.22	23.45	21.69	10.46	26.02	14.15	16.8767		hypothetical protein
gene00766	325.69	475.13	539.92	446.913	445.96	479.13	533.64	486.243	203.88	230.08	167.6	200.52	244.33	369.32	229.57	281.073		hypothetical protein
gene00767	578.95	528.93	471.44	526.44	461.78	497.1	500.52	486.467	382.88	349.32	352.77	361.657	73.28	134.45	140.65	116.127	UMPK	UMP-CMP kinase
gene00768	151.41	125.2	123.79	133.467	117.2	130.08	132.85	126.71	107.63	100.34	110.5	106.157	36.32	76.54	66.31	59.7233		Snf7-domain-containing protein
gene00769	20.84	47.85	80.18	49.6233	62.37	51.76	54.96	56.3633	75.16	68.28	60.28	67.9067	7.77	25.49	18.57	17.2767		myosin 5
gene00770	81.81	105.08	98.94	95.2767	109.26	112.94	107.79	109.997	134.91	123.02	108.54	122.157	30.51	72.91	60.53	54.65	NPL3	hypothetical protein
gene00771	320.79	495.08	555.8	457.223	824.94	856.3	767.5	816.247	576.73	631.06	597.94	601.91	23.28	78.98	51.47	51.2433	pgk	phosphoglycerate kinase
gene00772	22.69	40.06	40.84	34.53	60.02	60.87	51.09	57.3267	61.25	58.15	51.38	56.9267	8.43	19.65	18.06	15.38		alpha-glucosidase
gene00773	59.44	43.24	51.17	51.2833	44.19	44.09	41.82	43.3667	45.83	44.23	33.89	41.3167	10.56	20.29	16.36	15.7367		Phosphoglucomutase, first 3 domain-containing protein
gene00774	0	0	0	0	0	0	0	0	0	0	0	0	0	0	0	0		hypothetical protein
gene00775	0	0	0	0	0	0	0	0	0	0	0	0	0	0	0	0		hypothetical protein
gene00776	0	0	0	0	0	0	0	0	0	0	0	0	0	0	0	0		hypothetical protein
gene00777	0	0	0	0	0	0	0	0	0	0	0	0	0	0	0	0		hypothetical protein
gene00778	0	0	0	0	0	0	0	0	0	0	0	0	0.01	0	0	0.00333333		hypothetical protein
gene00779	0	0	0	0	0	0	0	0	0	0	0	0	0	0	0	0		hypothetical protein
gene00780	0	0	0	0	0	0	0	0	0	0	0	0	0	0	0.04	0.0133333		hypothetical protein
gene00781	0	0	0	0	0	0	0	0	0	0	0	0	0	0	0	0		hypothetical protein
gene00782	0	0	0	0	0	0	0	0	0	0	0	0	0.02	0	0	0.00666667		hypothetical protein
gene00783	0	0	0	0	0	0	0	0	0	0	0	0	0	0	0.06	0.02		hypothetical protein
gene00784	0	0	0	0	0	0	0	0	0	0	0	0	0	0	0	0		hypothetical protein
gene00785	0	0	0	0	0	0	0	0	0	0	0	0	0	0	0	0		hypothetical protein
gene00786	0	0	0	0	0	0	0	0	0	0	0	0	0	0	0	0		hypothetical protein
gene00787	0	0	0	0	0	0	0	0	0	0	0	0	0	0	0	0		hypothetical protein
gene00788	0	0	0	0	0	0	0	0	0	0	0	0	0	0	0	0		hypothetical protein
gene00789	0	0	0	0	0	0	0	0	0	0	0	0	0	0	0	0		hypothetical protein
gene00790	0	0	0	0	0	0	0	0	0	0	0	0	0	0	0	0		hypothetical protein
gene00791	0	0	0	0	0	0	0	0	0	0	0	0	0	0	0.02	0.00666667		hypothetical protein
gene00792	0	0	0	0	0	0	0	0	0	0	0	0	0	0	0	0		hypothetical protein
gene00793	0	0	0	0	0.05	0.06	0	0.0366667	0.03	0	0	0.01	0	0	0	0		hypothetical protein
gene00794	0	0	0	0	0	0	0	0	0	0	0	0	0	0	0	0		hypothetical protein
gene00795	0	0	0	0	0	0	0	0	0	0	0	0	0	0	0	0		hypothetical protein
gene00796	0	0	0.02	0.00666667	0	0	0	0	0	0	0	0	0	0	0	0		hypothetical protein
gene00797	0	0	0	0	0	0	0	0	0	0	0	0	0	0	0	0		hypothetical protein
gene00798	0.3	0.36	0.35	0.336667	0.43	0.33	0.61	0.456667	0.2	0.26	0.19	0.216667	0.09	0.06	0.03	0.06		hypothetical protein
gene00799	0	0	0	0	0	0	0	0	0	0	0	0	0	0	0	0		Retrovirus-related Pol polyprotein from transposon opus Includes: RecName: Full=Protease
gene00800	0	0	0	0	0	0	0	0	0	0	0	0	0	0	0	0		hypothetical protein
gene00801	0	0	0	0	0	0	0	0	0	0	0	0	0	0	0	0		hypothetical protein
gene00802	0	0	0	0	0	0	0	0	0	0	0	0	0	0	0	0		hypothetical protein
gene00803	0	0	0	0	0	0	0	0	0	0	0	0	0	0	0	0		DNA/RNA polymerase
gene00804	14.19	7.72	8.54	10.15	6.08	4.81	7.17	6.02	7.88	10.87	6.11	8.28667	3.72	8.86	9.51	7.36333		PNK3P-domain-containing protein
gene00805	25	32.92	37.26	31.7267	34.09	30.48	31.82	32.13	31.46	32.84	29.88	31.3933	8.12	21.58	19.29	16.33		hypothetical protein
gene00806	62.91	122.18	161.57	115.553	196.12	209.74	183.24	196.367	157.97	151.75	150.56	153.427	37.73	103.34	60.3	67.1233		acetyl-CoA synthetase-like protein
gene00807	3.49	5.87	6.56	5.30667	10.25	14.33	10.3	11.6267	15.17	18.57	19.11	17.6167	1.12	3.18	2.16	2.15333		nonribosomal peptide synthetase 12
gene00808	18.44	13.03	15.79	15.7533	17.09	18.33	15.09	16.8367	25.02	28.83	32.64	28.83	9.61	7.78	4.48	7.29		enoyl-CoA hydratase/isomerase
gene00809	207.35	191.66	195.13	198.047	219.67	193.71	206.1	206.493	237.99	223.41	227.47	229.623	95.17	171.34	131.46	132.657	UNRIP	serine/threonine kinase receptor associated protein
gene00810	10.62	9.97	12.88	11.1567	17.71	17.1	14.3	16.37	17.03	14.04	16.63	15.9	1.1	2.31	1.84	1.75		sulfate permease
gene00811	22.51	32.78	31.1	28.7967	30.29	24.57	25.98	26.9467	32.36	32.57	27.48	30.8033	12.89	23	21.36	19.0833	map	methionine aminopeptidase
gene00812	26.52	46.26	46.83	39.87	51.51	39.55	38.51	43.19	47.7	39.85	40.54	42.6967	8.33	24.14	16.67	16.38		glycerol-3-phosphate O-acyltransferase
gene00813	8.44	21.27	38.97	22.8933	32.08	28.34	27.52	29.3133	32.58	30.55	26.54	29.89	2.38	6.53	3.66	4.19	XMAP215	ARM repeat-containing protein
gene00814	50.03	66	64.37	60.1333	61.67	47.27	60.33	56.4233	64.27	58.29	56.73	59.7633	31.77	47.64	43.32	40.91		nagb/rpia/CoA transferase-like protein
gene00815	3.34	3.37	2.74	3.15	5.09	4.77	4.2	4.68667	6.18	2.22	8.21	5.53667	1.62	0.32	3.96	1.96667		hypothetical protein
gene00816	3.6	6.94	15.32	8.62	7.1	6.66	5.99	6.58333	6.72	5.36	4.54	5.54	2.38	7.33	7.1	5.60333		hypothetical protein
gene00817	75.42	40.19	33.04	49.55	38.89	35.43	35.31	36.5433	25.66	21.72	25.94	24.44	5.95	11.73	8.85	8.84333		RWD-domain-containing protein
gene00818	13.89	21.02	28.22	21.0433	18.99	16.14	15.92	17.0167	15.53	15.23	13.75	14.8367	2.88	7.82	5.81	5.50333		hypothetical protein
gene00819	14.85	16.94	19.98	17.2567	20.74	18.27	15.64	18.2167	23.81	21.78	19.25	21.6133	3.9	12.79	12.66	9.78333		hypothetical protein
gene00820	58.14	34.95	44.28	45.79	26.78	25.08	18.14	23.3333	8.13	8.18	7.18	7.83	3.14	9.43	12.24	8.27		hypothetical protein
gene00821	21.32	10.6	14.47	15.4633	16.47	13.62	16.12	15.4033	14.61	14.32	11.56	13.4967	11.05	27.38	24.78	21.07		hypothetical protein
gene00822	6.79	3.92	3.87	4.86	5.51	3.57	5.73	4.93667	5.95	3.03	2.74	3.90667	5.6	7.14	9.15	7.29667		hypothetical protein
gene00823	3.76	8.85	14.11	8.90667	10.64	9.68	8.55	9.62333	9.68	8.5	6.29	8.15667	1.48	4.4	2.53	2.80333		hypothetical protein
gene00824	9.72	16.95	20.12	15.5967	20.84	17.28	17.68	18.6	24.25	24.11	26.45	24.9367	1.04	1.85	1.46	1.45		hypothetical protein
gene00825	68.37	58.51	56.14	61.0067	45.54	57.15	58.44	53.71	50.03	50.39	50.14	50.1867	13.93	31.6	25.56	23.6967		hypothetical protein
gene00826	42.33	46.75	51.65	46.91	34.57	36.07	30.36	33.6667	34.23	32.51	34.58	33.7733	4.4	7.93	6.17	6.16667		hypothetical protein
gene00827	24.03	13.45	13.19	16.89	23.98	36.05	25.5	28.51	46.68	46.37	32.64	41.8967	7.34	23.43	13.86	14.8767		hypothetical protein
gene00828	28.95	21.82	16.3	22.3567	17.2	25.27	19.38	20.6167	19.99	19.78	21.2	20.3233	5.15	11.61	8.78	8.51333		hypothetical protein
gene00829	81.94	241.58	347.42	223.647	236.85	146.1	177.99	186.98	200.58	165.35	156.57	174.167	9.29	18.56	11.93	13.26		hypothetical protein
gene00830	30.12	30.4	30.58	30.3667	54.82	100.88	86.53	80.7433	136.23	171.54	130.99	146.253	3.55	9.56	8.49	7.2	XPD	DNA repair helicase
gene00831	96.5	176.89	170.11	147.833	383.2	403.32	358.23	381.583	582.61	588.03	584.08	584.907	8.93	19.87	14.57	14.4567		glycoside hydrolase
gene00832	55.41	81.88	85.09	74.1267	128.21	115.74	115.53	119.827	175.24	168.96	167.14	170.447	23.55	39.32	31.09	31.32		hypothetical protein
gene00833	11.9	16.38	19.12	15.8	11.58	13.14	12.48	12.4	19.52	20.98	16.46	18.9867	6.42	11.87	9.15	9.14667		hypothetical protein
gene00834	143.94	209.49	247.79	200.407	238.84	236.69	246.76	240.763	247.93	254.93	286.6	263.153	46.84	103.15	66.91	72.3		hypothetical protein
gene00835	16.54	23.55	28.45	22.8467	24.46	21.5	21.63	22.53	26.78	24.56	23.05	24.7967	3.24	7.74	5.1	5.36		hypothetical protein
gene00836	15.84	32.62	42.34	30.2667	35.64	33.51	32.72	33.9567	37.09	34.47	31.45	34.3367	4.73	12.06	7.96	8.25		cytochrome P450 monooxygenase pc-3
gene00837	2.27	5.06	5.7	4.34333	3.1	5.06	4.32	4.16	3.83	4.08	3.53	3.81333	2.44	6.37	3.37	4.06		hypothetical protein
gene00838	0	0	0	0	0	0	0	0	0	0	0	0	0	0	0	0		hypothetical protein
gene00839	58.45	35.57	37.46	43.8267	38.97	41.49	39.75	40.07	41.47	37.56	33.16	37.3967	2.78	6.06	4.97	4.60333		hypothetical protein
gene00840	0	0	0	0	0	0	0	0	0	0	0	0	0	0	0	0		hypothetical protein
gene00841	0	0	0	0	0	0	0	0	0	0	0	0	0	0	0	0		hypothetical protein
gene00842	0	0.07	0	0.0233333	0	0	0.06	0.02	0.07	0.11	0.06	0.08	0.08	0.11	0.03	0.0733333		hypothetical protein
gene00843	0	0	0	0	0	0	0	0	0	0	0	0	0	0	0	0		hypothetical protein
gene00844	0	0	0	0	0	0	0	0	0	0	0	0	0	0.08	0	0.0266667		hypothetical protein
gene00845	7.14	5.87	10.51	7.84	7.95	7.67	6.97	7.53	8.69	8.37	7.08	8.04667	5.2	10.56	6.22	7.32667		hypothetical protein
gene00846	0	0	0	0	0	0	0	0	0	0	0	0	0	0	0	0		hypothetical protein
gene00847	0	0	0	0	0	0	0	0	0	0	0	0	0.13	0.13	0.32	0.193333		hypothetical protein
gene00848	0	0	0	0	0	0	0	0	0	0	0	0	0	0	0	0		hypothetical protein
gene00849	23.83	20.38	17.17	20.46	19.07	20.93	23.74	21.2467	13.85	19.47	21.33	18.2167	6.97	21.76	17.9	15.5433	PPTC7	protein serine/threonine phosphatase 2C
gene00850	194	408.66	349.04	317.233	774.17	2074.28	826.82	1225.09	1322.99	1005.2	795.53	1041.24	2.81	4.76	2.55	3.37333		putative purine nucleoside permease
gene00851	34.55	21.69	25.84	27.36	14.21	22.13	14.45	16.93	10.58	12.82	13.65	12.35	6.53	14.54	11.82	10.9633		hypothetical protein
gene00852	5.19	7.12	12.67	8.32667	9.83	10.75	8.43	9.67	10.98	16.33	9.23	12.18	1.97	4.68	4.45	3.7		hypothetical protein
gene00853	30.48	42.63	56.92	43.3433	49.21	54.23	51.07	51.5033	47.9	49.3	42.14	46.4467	6.17	16.8	11.28	11.4167		hypothetical protein
gene00854	2.12	2.68	4.17	2.99	6.11	10.19	4.38	6.89333	8.02	13.63	12.11	11.2533	0.4	0.88	0.65	0.643333		hypothetical protein
gene00855	103.04	177.63	207.52	162.73	204.99	192.31	189.73	195.677	172.22	165.17	154.2	163.863	24.42	59.77	46.54	43.5767		FTHFS-domain-containing protein
gene00856	34.08	22.07	18.01	24.72	21.32	14.17	19.64	18.3767	16.28	17.61	20.1	17.9967	32.04	42.24	37.36	37.2133		GrpE-domain-containing protein
gene00857	1.83	2.62	4.23	2.89333	6.6	7	8.81	7.47	8.12	7.6	5.25	6.99	1.25	2.49	1.05	1.59667		hypothetical protein
gene00858	0.76	1.41	0.85	1.00667	0.85	0.75	1.94	1.18	1.43	1.03	1.47	1.31	0.17	0.21	0.03	0.136667		hypothetical protein
gene00859	39.8	36.5	31.06	35.7867	10.77	11.47	27.4	16.5467	9.4	5.72	14.84	9.98667	3.26	9.51	9.04	7.27		hypothetical protein
gene00860	8.02	15.07	14.41	12.5	11.68	12.36	12.11	12.05	14.52	14.87	13.31	14.2333	4.52	13.52	10.11	9.38333		hypothetical protein
gene00861	6.01	11.08	12.91	10	8.9	7.07	7.2	7.72333	8.83	8.26	9.34	8.81	6.15	9.13	14.92	10.0667		cyclin-like protein
gene00862	6.26	3.76	2.68	4.23333	2.3	2.06	3.26	2.54	1.75	2.3	2.7	2.25	1.23	2.51	2.33	2.02333		hypothetical protein
gene00863	43.15	34.04	35.92	37.7033	23	18.58	24.54	22.04	18.08	17.13	17.3	17.5033	33.58	52.17	54.54	46.7633	rlmE	23S ribosomal RNA methyltransferase
gene00864	10.19	21.17	15.9	15.7533	20.02	15.86	19.27	18.3833	12.54	13.71	10.95	12.4	2.16	5.83	5.81	4.6		DUF833-domain-containing protein
gene00865	40.75	73.62	83.49	65.9533	78.97	68.42	87.46	78.2833	88.06	73.84	89.96	83.9533	21.5	35.12	30.91	29.1767		hypothetical protein
gene00866	11.99	11.71	5.11	9.60333	2.07	5.22	6.09	4.46	7.92	11.06	8.4	9.12667	3.17	7.97	7.31	6.15		alpha/beta-hydrolase
gene00867	9.11	9.21	10.43	9.58333	12.22	11.69	11.05	11.6533	16.35	21.15	22.69	20.0633	0.9	4.33	3.54	2.92333		hypothetical protein
gene00868	25.42	11.7	15.78	17.6333	26.58	34.93	22.25	27.92	46.82	73.24	69.23	63.0967	7.14	22.48	20.65	16.7567		hypothetical protein
gene00869	68.05	100.52	126.59	98.3867	107.26	85.13	97.11	96.5	117.24	107.48	101.84	108.853	30.16	68.12	46.52	48.2667		ATP-dependent metallopeptidase Hfl
gene00870	1.55	1.55	2.08	1.72667	1.5	2.29	1.03	1.60667	2.92	1.05	1.34	1.77	0.42	0.68	1.12	0.74		hypothetical protein
gene00871	0	0	0	0	0	0	0	0	0	0	0	0	0	0	0	0		hypothetical protein
gene00872	0	0	0	0	0	0	0	0	0	0	0	0	0	0	0	0		hypothetical protein
gene00873	0	0	0	0	0	0	0	0	0	0	0	0	0	0	0	0		hypothetical protein
gene00874	0	0	0	0	0	0	1.41	0.47	0	0	0	0	0	0	0	0		hypothetical protein
gene00875	0	0	0	0	0	0	0	0	0	0	0	0	0	0	0	0		hypothetical protein
gene00876	0	0	0	0	0	0	0	0	0	0	0	0	0	0	0	0		hypothetical protein
gene00877	0	0	0	0	0	0	0	0	0	0	0	0	0	0	0	0		hypothetical protein
gene00878	0.14	0.31	0.25	0.233333	0.18	0.45	0.24	0.29	0.22	0.25	0.04	0.17	0.32	0.49	0.27	0.36		hypothetical protein
gene00879	0	0	0	0	0	0	0	0	0	0	0	0	0	0	0	0		hypothetical protein
gene00880	0	0	0	0	0	0	0	0	0	0	0	0	0	0	0	0		hypothetical protein
gene00881	0	0	0	0	0	0	0	0	0	0	0	0	0	0	0	0		hypothetical protein
gene00882	0	0	0	0	0	0	0	0	0	0	0	0	0	0	0	0		hypothetical protein
gene00883	31.76	40.48	42.24	38.16	30.37	26.81	31.18	29.4533	32.62	34.93	29.97	32.5067	15.93	37.1	23.62	25.55	ABS	P-loop containing nucleoside triphosphate hydrolase protein
gene00884	250.62	308.06	238.92	265.867	57.98	49.41	60.82	56.07	34.47	30.9	34.32	33.23	37.95	67.66	50.55	52.0533		hypothetical protein
gene00885	45.23	35.93	38.18	39.78	30.21	27.42	28.46	28.6967	27.03	24.63	24.99	25.55	14.71	29.41	27.64	23.92	fadD	long-chain-fatty-acid-CoA ligase
gene00886	16.41	28.5	33.33	26.08	47	43.22	38.17	42.7967	32.57	27.53	30.22	30.1067	5.64	15.57	9.7	10.3033		hypothetical protein
gene00887	0	0	0	0	0	0	0	0	0	0	0	0	0	0	0	0		hypothetical protein
gene00888	0	0	0	0	0	0	0	0	0	0	0	0	0.01	0	0	0.00333333		hypothetical protein
gene00889	0.05	0	0	0.0166667	0	0.09	0	0.03	0.1	0.14	0.05	0.0966667	0	0	0	0		hypothetical protein
gene00890	1.61	1.22	1.31	1.38	2.66	2.17	2.72	2.51667	2.38	2.23	1.13	1.91333	0.09	0.21	0.55	0.283333		hypothetical protein
gene00891	0	0	0	0	0	0	0	0	0	0	0	0	0	0	0	0		hypothetical protein
gene00892	0	0	0	0	0	0	0	0	0	0	0	0	0	0	0	0		hypothetical protein
gene00893	1.36	0	0	0.453333	1.03	0	0.48	0.503333	0	0	1.01	0.336667	0	0.53	0	0.176667		hypothetical protein
gene00894	0	0	0	0	0	0	0	0	0	0	0	0	0	0	0	0		hypothetical protein
gene00895	0	0	0	0	0	0	0	0	0	0	0	0	0	0	0	0		hypothetical protein
gene00896	0	0	0	0	0	0	0	0	0	0	0	0	0	0	0	0		hypothetical protein
gene00897	0	0	0	0	0	0	0	0	0	0	0	0	0	0	0	0		hypothetical protein
gene00898	6.62	4.13	2.47	4.40667	4.82	4.95	6.2	5.32333	4.8	4.67	2.81	4.09333	0.82	2.61	1.68	1.70333		hypothetical protein
gene00899	0.29	0	0	0.0966667	0	0.7	0	0.233333	0.35	0.84	0	0.396667	0.1	0.17	0.49	0.253333		hypothetical protein
gene00900	11.5	13.41	11.42	12.11	29.24	25.89	29.86	28.33	25.84	24.03	18.48	22.7833	6.24	11.85	9.81	9.3		hypothetical protein
gene00901	5.71	16.02	23.47	15.0667	20.69	18.62	24.49	21.2667	21.57	15.39	16.65	17.87	4.25	11.32	5.94	7.17		hypothetical protein
gene00902	4.16	6.55	4.86	5.19	4.68	6.93	5.14	5.58333	6.55	6.18	4.39	5.70667	2.32	2.57	3.33	2.74		hypothetical protein
gene00903	2.21	2.69	1.39	2.09667	2.73	3.98	4.86	3.85667	2.11	2.17	2.46	2.24667	4.47	10.75	9.79	8.33667		hypothetical protein
gene00904	0.74	1.08	0.42	0.746667	6.53	4.14	3.85	4.84	1.7	1.95	1.82	1.82333	0.04	0.15	0.21	0.133333		hypothetical protein
gene00905	0	0	0	0	0	0	0	0	0	0	0	0	0.17	0.35	0.07	0.196667		DNA/RNA polymerase
gene00906	0	0	0	0	0	0	0	0	0	0	0	0	0	0	0	0		hypothetical protein
gene00907	0	0	0	0	0.36	0.2	0.36	0.306667	0	0.16	0.54	0.233333	0	0	0	0		hypothetical protein
gene00908	22.7	8.69	8.3	13.23	9.24	11.51	15.19	11.98	10.75	10.43	10.87	10.6833	3.95	8.98	8.28	7.07		hypothetical protein
gene00909	9.27	6.47	5.35	7.03	7.82	8.71	7.05	7.86	5.91	5.91	3.74	5.18667	3.01	4.31	5.18	4.16667		hypothetical protein
gene00910	86.86	86.79	74.3	82.65	101.52	107.33	101.38	103.41	81.33	77.88	76.63	78.6133	7.12	13.2	14.56	11.6267		hypothetical protein
gene00911	1.85	1.55	1.22	1.54	2.38	1.93	1.22	1.84333	1.14	1.4	0.7	1.08	0.08	0.25	0	0.11		hypothetical protein
gene00912	51.24	22.73	17.65	30.54	46.1	45.55	45.06	45.57	23.29	26.33	31.72	27.1133	1.62	5.12	3.77	3.50333		C-signal
gene00913	6.42	10.37	11.69	9.49333	10.89	10.46	12.76	11.37	15.45	13.09	12.75	13.7633	7.14	20.39	15.91	14.48		hypothetical protein
gene00914	10.89	6.7	2.01	6.53333	8.31	9.02	7.8	8.37667	10.71	5.64	8.01	8.12	1.06	2.05	3.47	2.19333		hypothetical protein
gene00915	28.84	30.58	21.09	26.8367	14.36	15.37	15.55	15.0933	13.51	19.91	15.45	16.29	3.39	6.77	6.54	5.56667		hypothetical protein
gene00916	0	0	0	0	0	0	0	0	0	0	0	0	0	0	0	0		hypothetical protein
gene00917	10.88	20.14	21.62	17.5467	14.13	15.15	12.22	13.8333	11.45	11.91	8.34	10.5667	22.92	60	40.94	41.2867		hypothetical protein
gene00918	0.27	0.31	0	0.193333	0	0.97	0.29	0.42	0	0.52	0.3	0.273333	0	0.16	0.46	0.206667		hypothetical protein
gene00919	8.13	5.74	4.74	6.20333	7.02	5.44	14.62	9.02667	16.36	13.14	11.95	13.8167	0.46	1.44	1.08	0.993333		hypothetical protein
gene00920	2.36	0	1.56	1.30667	8.54	1.51	6.54	5.53	1.54	6.23	1.4	3.05667	0.75	3.3	0	1.35		hypothetical protein
gene00921	0	0	0	0	0	0	0	0	0	0	0	0	0	0	0	0		hypothetical protein
gene00922	0.34	0.04	0.12	0.166667	0.08	0.13	0.19	0.133333	0.13	0.14	0.23	0.166667	0.3	0.42	0.53	0.416667		polyprotein
gene00923	0.04	0.09	0.18	0.103333	0.09	0	0	0.03	0	0.12	0	0.04	0.08	0.24	0.38	0.233333		polyprotein
gene00924	6.05	9.76	10.05	8.62	9.05	10.04	10.69	9.92667	14.08	12.06	10.48	12.2067	2.19	6.74	4.93	4.62		hypothetical protein
gene00925	0	0	0	0	0	0	0	0	0	0	0.36	0.12	0	0.19	0	0.0633333		hypothetical protein
gene00926	11.6	18.75	21.28	17.21	16	15.65	18.4	16.6833	20.39	18.23	14.24	17.62	4.68	13.52	7.89	8.69667		hypothetical protein
gene00927	2.48	1.44	1.49	1.80333	4.56	5.3	12.58	7.48	11.56	12.21	10	11.2567	0.29	0.8	0.45	0.513333		hypothetical protein
gene00928	0.93	0.52	0	0.483333	0	0.54	0	0.18	0	0.44	0.25	0.23	0	0.55	0.39	0.313333		hypothetical protein
gene00929	5.24	9.59	8.89	7.90667	7.94	7.57	7.76	7.75667	7.51	7.83	7.08	7.47333	0.42	1.02	1.21	0.883333		hypothetical protein
gene00930	0	0	0	0	0	0	0	0	0	0	0	0	0	0	0	0		hypothetical protein
gene00931	4.55	4.34	2.24	3.71	9.03	12.15	7.75	9.64333	9.24	9.92	13.01	10.7233	0.35	1.36	0.43	0.713333		hypothetical protein
gene00932	2.09	3.38	0.99	2.15333	4.54	5.44	5.07	5.01667	4.64	3.48	2.26	3.46	0.43	0.39	0.64	0.486667		hypothetical protein
gene00933	0.19	0.42	0	0.203333	0.31	1.57	0.2	0.693333	0.44	0.18	0.2	0.273333	0	0.12	0	0.04		NAD(P)-binding protein
gene00934	2.8	2.22	3.35	2.79	2.16	2.68	3.87	2.90333	2.86	2.42	2.93	2.73667	1.85	3.64	3.03	2.84		hypothetical protein
gene00935	10.55	8.81	11.63	10.33	16.36	21.84	14.35	17.5167	15.34	19.47	25.2	20.0033	2.93	7.36	5.28	5.19		hypothetical protein
gene00936	16.19	24.06	14.81	18.3533	9.21	17.44	28.34	18.33	7.54	14.02	24.74	15.4333	0.85	1.23	1.61	1.23		short chain dehydrogenase/reductase family protein
gene00937	1.76	2.5	1.02	1.76	4.56	5.41	5.68	5.21667	6.29	7.33	5.2	6.27333	0.28	0.47	0.48	0.41		hypothetical protein
gene00938	1.54	1.64	2.07	1.75	1.84	1.54	1.15	1.51	0.58	1.15	0.87	0.866667	0.36	1.79	0.91	1.02		solute symporter family transporter
gene00939	9.26	8.34	10.88	9.49333	16.76	19.69	17.33	17.9267	17.13	22.6	17.56	19.0967	4.42	12.39	8.01	8.27333		solute symporter family transporter
gene00940	5.63	8.85	8.13	7.53667	8.63	10.38	13.09	10.7	6.18	5.88	6.21	6.09	2.75	7.37	5.27	5.13		hypothetical protein
gene00941	0	0	0	0	0	0	0	0	0	0	0	0	0	0	0	0		hypothetical protein
gene00942	18.63	32.21	33.33	28.0567	28.94	21.24	31.53	27.2367	20.59	15.57	16.62	17.5933	1.94	2.74	2.33	2.33667		hypothetical protein
gene00943	5.26	5.85	1.51	4.20667	66.06	89.84	63.31	73.07	18.49	20.46	9.16	16.0367	0.15	1.34	0.51	0.666667		NAD(P)-binding protein
gene00944	1.41	1.2	1.28	1.29667	1.9	2.42	2.43	2.25	2.5	2.65	1.97	2.37333	0.03	0.14	0.18	0.116667		hypothetical protein
gene00945	63.05	97	95.93	85.3267	83.94	76.16	79.8	79.9667	87.03	76	75.98	79.67	29.09	66.97	48.44	48.1667		Tudor/PWWP/MBT
gene00946	1.93	3.41	4.06	3.13333	3.31	2.21	2.05	2.52333	1.7	2.49	1.24	1.81	0.38	0.66	0.36	0.466667		hypothetical protein
gene00947	0	0	0	0	0	2.1	1.79	1.29667	8.58	1.74	1.94	4.08667	0.5	2.63	0	1.04333		hypothetical protein
gene00948	65.34	56.74	36.7	52.9267	104.1	71.89	98.95	91.6467	56.37	44.24	40.15	46.92	52.81	47.73	41.75	47.43	ANT	ADP,ATP carrier protein
gene00949	17.28	28.61	18.12	21.3367	118.22	44.42	100.73	87.79	29.8	31.56	38.99	33.45	0.86	0.52	0.74	0.706667		FAD/NAD(P)-binding domain-containing protein
gene00950	0	0.84	2.56	1.13333	0.79	4.21	0.74	1.91333	0.85	2.75	1.56	1.72	0	0.78	0.74	0.506667		hypothetical protein
gene00951	9.48	17.8	31.32	19.5333	33.12	39.79	35.22	36.0433	33.08	37.45	36.32	35.6167	4.49	12.09	7.57	8.05		hypothetical protein
gene00952	0.84	1.7	1.91	1.48333	2.53	2.12	1.61	2.08667	3.06	3.01	2.82	2.96333	0.14	0.34	0.88	0.453333		hypothetical protein
gene00953	0	0	0	0	0	0	0	0	0	0	0	0	0	0	0	0		hypothetical protein
gene00954	0	0	0	0	0	0	0	0	0	0	0	0	0	0	0	0		hypothetical protein
gene00955	0	0	0	0	0	0	0	0	0	0	0	0	0	0	0	0		hypothetical protein
gene00956	13.79	11.12	2.65	9.18667	12.98	5.42	13.27	10.5567	11.75	9.67	9.75	10.39	2.76	4.21	2.13	3.03333	ANT	ADP,ATP carrier protein
gene00957	0	0.18	0.18	0.12	0	0.56	0.34	0.3	0.46	0.38	0.17	0.336667	0.03	0	0	0.01		predicted protein
gene00958	0.58	0.19	0	0.256667	0.17	0	0.19	0.12	0.4	0	0.18	0.193333	0.11	0.32	0.6	0.343333	ANT	ADP,ATP carrier protein
gene00959	0	0	0	0	0	0	0	0	0	0	0	0	0	0	0	0		hypothetical protein
gene00960	0	0	0	0	0	0	0	0	0	0	0	0	0	0	0	0		hypothetical protein
gene00961	0	0	0	0	0	0	0	0	0	0	0	0	0	0	0	0		hypothetical protein
gene00962	1.11	2.4	4.52	2.67667	2.99	3.18	2.46	2.87667	5.12	5.78	2.15	4.35	0.29	1.24	1.13	0.886667		hypothetical protein
gene00963	34.4	55.77	60.67	50.28	30.71	35.37	23.62	29.9	31.07	27.06	20.73	26.2867	4.2	11.95	10.67	8.94		alpha-L-arabinofuranosidase B
gene00964	11.06	10.38	9.77	10.4033	6.35	4.45	5.69	5.49667	7.05	6.64	3.03	5.57333	0.7	1.26	0.92	0.96		FAD/NAD(P)-binding domain-containing protein
gene00965	0	0	0	0	0	0	0	0	0	0	0	0	0	0	0	0		hypothetical protein
gene00966	0	0	0	0	0	0	0	0	0	0	0	0	0	0	0	0		hypothetical protein
gene00967	0	18.35	0	6.11667	0	0	0	0	0	0	27.24	9.08	0	0	0	0		hypothetical protein
gene00968	8.73	8.3	8.35	8.46	9.14	8.4	5.02	7.52	11.58	7.99	6.69	8.75333	2.67	5.92	4.48	4.35667		hypothetical protein
gene00969	4.83	4.09	3.33	4.08333	5.8	5.64	5.86	5.76667	3.81	5.64	4.95	4.8	0.38	1.96	0.76	1.03333		hypothetical protein
gene00970	7.04	13.2	11.4	10.5467	8.38	3.81	7.18	6.45667	8.11	3.53	5.39	5.67667	6.7	14.07	13.26	11.3433		hypothetical protein
gene00971	0.88	0.67	1.38	0.976667	2.58	1.39	1.86	1.94333	9.73	3.94	7.69	7.12	3.27	6.6	2.63	4.16667		alcohol dehydrogenase
gene00972	7.55	8.2	10.87	8.87333	9.92	10.06	15.37	11.7833	47.51	49.65	57.93	51.6967	15.51	25.79	15.48	18.9267		alcohol dehydrogenase
gene00973	4.51	0.94	4.76	3.40333	0	1.87	0	0.623333	0	1.53	1.74	1.09	0.24	0.43	0	0.223333		hypothetical protein
gene00974	0	1	0	0.333333	0	0	0	0	0	0	0	0	0	0.45	0	0.15		hypothetical protein
gene00975	154.29	160.35	130.6	148.413	170.47	165.45	176.37	170.763	220.5	224.63	235.1	226.743	21.34	43.87	68.22	44.4767		YjeF domain-containing protein
gene00976	2.13	0	0	0.71	0	0	0	0	0	0	0	0	0	0	0	0		hypothetical protein
gene00977	43.43	41.75	50.35	45.1767	22.65	24.2	16.84	21.23	16.72	20.09	15.66	17.49	2.13	9.37	4.68	5.39333		hypothetical protein
gene00978	0.12	1.27	1.18	0.856667	1.97	1.21	0.73	1.30333	2.66	1.3	1.23	1.73	0.08	0.14	0.2	0.14		hypothetical protein
gene00979	31.47	37.06	36.56	35.03	57.18	67.35	56.42	60.3167	34.69	35.76	33.72	34.7233	1.85	5.18	4.24	3.75667		zincin
gene00980	6.19	14.7	18.73	13.2067	17.2	11.63	13.61	14.1467	27.13	22.23	17.84	22.4	3	6.15	4.58	4.57667		hypothetical protein
gene00981	28.82	44.37	48.03	40.4067	60.86	67.96	56.27	61.6967	52.25	42.36	37.01	43.8733	6.42	12.23	9.69	9.44667		hypothetical protein
gene00982	37.99	65.27	53.9	52.3867	68.55	80.71	80.26	76.5067	68.73	65.34	54.12	62.73	9.74	20.61	15.21	15.1867		hypothetical protein
gene00983	10.94	0	0	3.64667	36.59	16.08	72.35	41.6733	8.31	41.38	28.9	26.1967	0	5.6	2.74	2.78		hypothetical protein
gene00984	277.83	215.59	175.78	223.067	223.05	222.89	238.8	228.247	173.97	162.42	157.02	164.47	8.44	21.97	15.84	15.4167		hypothetical protein
gene00985	97.72	122.2	126.55	115.49	90.45	87.53	88.16	88.7133	97.62	84.12	80	87.2467	72.02	102.19	91.4	88.5367		hypothetical protein
gene00986	137.19	71.96	77.79	95.6467	70.21	33.52	84.38	62.7033	19.22	18.1	13.34	16.8867	5.52	8.79	8.7	7.67		alpha/beta-hydrolase
gene00987	7.43	12.2	12.92	10.85	12.6	14.13	13.98	13.57	16.08	14.94	16.31	15.7767	1.86	4.98	3.47	3.43667		hypothetical protein
gene00988	5.21	2.77	4.36	4.11333	2.99	1.96	3.63	2.86	2.15	2.28	2.97	2.46667	1.22	2.78	1.57	1.85667	hemC	porphobilinogen deaminase
gene00989	0.63	1.08	0.81	0.84	0.29	0.63	0.84	0.586667	2.98	1.76	1.51	2.08333	3.18	4.08	4.13	3.79667		hypothetical protein
gene00990	0	0	0	0	0	0	0	0	0	0	0	0	0	0	0	0		hypothetical protein
gene00991	0	0	0	0	0	0	0	0	0	0	0	0	0	0	0	0		hypothetical protein
gene00992	0	0	0	0	0	0	0	0	0	0	0	0	0	0	0	0		hypothetical protein
gene00993	0	0	0	0	0	0	0	0	0	0	0	0	0	0	0	0		hypothetical protein
gene00994	0	0	0	0	0	0	0	0	0	0	0	0	0	0	0	0		RnaseH domain, transposon factor
gene00995	0	0	0	0	0	0	0	0	0	0	0	0	0	0	0	0	EGL	hypothetical protein
gene00996	0	0	0	0	0	0	0	0	0	0	0	0	0	0	0	0		hypothetical protein
gene00997	0	0	0	0	0	0	0	0	0	0	0	0	0	0	0	0		hypothetical protein
gene00998	0	0	0	0	0	0	0	0	0	0	0	0	0	0	0	0		hypothetical protein
gene00999	0.17	1.38	0.99	0.846667	1.17	0.58	0.66	0.803333	1.26	0.84	0.73	0.943333	0.17	0.88	0.61	0.553333		hypothetical protein
gene01000	0	0	0	0	0	0	0	0	0	0	0	0	0	0	0	0		hypothetical protein
gene01001	0	0	0	0	0	0	0.02	0.00666667	0	0	0	0	0	0	0	0		predicted protein
gene01002	0	0	0	0	0	0	0	0	0	0	0	0	0	0	0	0		hypothetical protein
gene01003	0	0	0	0	0	0	0	0	0	0	0	0	0	0	0	0		hypothetical protein
gene01004	0	0	0	0	0	0	0	0	0	0	0	0	0	0	0	0		hypothetical protein
gene01005	11.09	28.4	48.09	29.1933	33.75	30.83	25.81	30.13	24.27	22.81	21.84	22.9733	0.32	1.12	0.84	0.76		hypothetical protein
gene01006	0	0	0	0	0	0	0	0	0	0	0	0	0	0	0	0		hypothetical protein
gene01007	0.07	0	0	0.0233333	0	0	0	0	0	0	0	0	0	0	0	0		hypothetical protein
gene01008	2.26	7.63	6.29	5.39333	4.74	4.57	6.12	5.14333	4.1	4.52	4.53	4.38333	0.27	0.88	0.5	0.55		hypothetical protein
gene01009	0	0	0	0	0	0	0	0	0	0	0	0	0.02	0.03	0.03	0.0266667		hypothetical protein
gene01010	0	0	0	0	0	0	0	0	0	0	0	0	0	0	0	0		hypothetical protein
gene01011	0	0	0	0	0	0	0	0	0	0	0	0	0	0	0	0		hypothetical protein
gene01012	0	0	0	0	0	0	0	0	0	0	0	0	0	0	0	0		hypothetical protein
gene01013	0	0	0	0	0	0	0	0	0	0	0	0	0	0	0	0		hypothetical protein
gene01014	0	0	0	0	0	0	0	0	0	0	0	0	0	0	0	0		fatty acid synthase
gene01015	0	0	0	0	0	0	0	0	0	0	0	0	0	0	0	0		hypothetical protein
gene01016	0.05	0.03	0.03	0.0366667	0	0	0	0	0.05	0	0.04	0.03	0	0	0.01	0.00333333		hypothetical protein
gene01017	0	0	0	0	0	0	0	0	0	0	0	0	0	0	0	0		hypothetical protein
gene01018	0	0	0	0	0	0	0	0	0	0	0	0	0	0	0	0	PMA2	plasma-membrane proton-e
gene01019	0	0	0	0	0	0	0	0	0	0	0	0	0	0	0	0		hypothetical protein
gene01020	0	0	0	0	0	0	0	0	0	0	0	0	0	0	0	0		fatty acid synthase
gene01021	0	0	0	0	0	0	0	0	0	0	0	0	0	0	0	0		hypothetical protein
gene01022	0	0	0	0	0	0	0	0	0	0	0	0	0	0	0	0		hypothetical protein
gene01023	0	0	0	0	0	0	0	0	0	0	0	0	0	0	0	0		hypothetical protein
gene01024	0	0	0	0	0	0	0	0	0	0	0	0	0	0	0	0		hypothetical protein
gene01025	33.51	52.19	80.26	55.32	59.49	55.77	49.07	54.7767	47.52	42.6	42.9	44.34	7.8	19.71	14.01	13.84		hypothetical protein
gene01026	0	0	0	0	0	0	0	0	0	0	0	0	0	0	0	0		hypothetical protein
gene01027	0	0	0	0	0	0	0	0	0	0	0	0	0	0	0	0		hypothetical protein
gene01028	0	0	0	0	0	0	0	0	0	0	0	0	0	0	0	0		hypothetical protein
gene01029	0	0	0	0	0	0	0	0	0	0	0	0	0	0	0	0		hypothetical protein
gene01030	0	0	0	0	0	0	0	0	0	0	0	0	0	0	0	0		hypothetical protein
gene01031	0	0	0	0	0	0	0	0	0	0	0	0	0	0	0	0		hypothetical protein
gene01032	0	0	0	0	0	0	0	0	0	0	0	0	0	0	0	0		hypothetical protein
gene01033	0	0	0	0	0	0	0	0	0	0	0	0	0	0	0	0		hypothetical protein
gene01034	0	0	0	0	0	0	0	0	0	0	0	0	0	0	0	0		hypothetical protein
gene01035	0	0	0	0	0	0	0	0	0	0	0	0	0	0	0	0		hypothetical protein
gene01036	0	0	0	0	0	0	0	0	0	0	0	0	0	0	0	0		hypothetical protein
gene01037	0	0	0	0	0	0	0	0	0	0	0	0	0	0	0	0		hypothetical protein
gene01038	0	0	0	0	0	0	0	0	0	0	0	0	0	0	0	0		hypothetical protein
gene01039	0	0	0	0	0	0	0	0	0	0	0	0	0	0	0	0		hypothetical protein
gene01040	0	0	0	0	0	0	0	0	0	0	0	0	0	0	0	0		hypothetical protein
gene01041	0	0	0	0	0	0	0	0	0	0	0	0	0	0	0	0		hypothetical protein
gene01042	0	0	0	0	0	0	0	0	0	0	0	0	0	0	0	0		hypothetical protein
gene01043	0	0	0	0	0	0	0	0	0	0	0	0	0	0	0	0		polyprotein
gene01044	0.71	0.8	0.77	0.76	0.75	0.76	0.49	0.666667	0.65	0.72	0.21	0.526667	0.06	0.17	0.17	0.133333		hypothetical protein
gene01045	0	0	0	0	0	0	0	0	0	0	0	0	0	0	0	0		hypothetical protein
gene01046	0	0	0	0	0	0	0	0	0	0	0	0	0	0	0	0		Cyanovirin-N
gene01047	0	0	0	0	0	0	0	0	0	0	0	0	0	0	0	0		hypothetical protein
gene01048	0	0	0	0	0	0	0	0	0	0	0	0	0	0	0	0		hypothetical protein
gene01049	6.09	14.05	16.18	12.1067	13.73	13.74	12.54	13.3367	12.06	10.89	11.18	11.3767	1.44	5.09	3.73	3.42		hypothetical protein
gene01050	0	0	0	0	0	0	0	0	0	0	0	0	0	0	0	0		hypothetical protein
gene01051	0	0	0	0	0	0	0	0	0	0	0	0	0	0	0	0		circumsporozoite protein
gene01052	0.11	0.05	0.18	0.113333	0.21	0.05	0.1	0.12	0.03	0.07	0.03	0.0433333	0.02	0	0	0.00666667		vacuolar protein sorting-associated protein vps13
gene01053	0.16	0	0.53	0.23	0	0.36	0.32	0.226667	0.89	0.44	0	0.443333	0	0	0	0		vacuolar protein sorting-associated protein vps13
gene01054	0	0	0	0	0	0	0	0	0	0	0	0	0	0	0	0	clpB	hypothetical protein
gene01055	0	0	0	0	0	0	0	0	0	0	0	0	0	0	0	0		hypothetical protein
gene01056	0	0	0	0	0	0	0	0	0	0	0	0	0	0	0	0		hypothetical protein
gene01057	0	0	0	0	0	0	0	0	0	0	0	0	0	0	0	0		histone-fold-containing protein
gene01058	0	0	0	0	0	0	0	0	0	0	0	0	0	0	0	0		hypothetical protein
gene01059	0	0	0	0	0	0	0	0	0	0	0	0	0	0	0	0		hypothetical protein
gene01060	2.57	1.01	0.77	1.45	1.86	2.82	2.39	2.35667	1.39	1.26	1.57	1.40667	0.76	1.13	0.69	0.86	TFG2	hypothetical protein
gene01061	11.15	19.33	14.24	14.9067	7.95	7.97	4.61	6.84333	1.4	1.28	0.32	1	0	0.27	0	0.09		hypothetical protein
gene01062	0	0	0	0	0	0	0	0	0	0	0	0	0	0	0	0		hypothetical protein
gene01063	0	0	0	0	0	0	0	0	0	0	0	0	0	0	0	0		hypothetical protein
gene01064	0	0	0	0	0	0	0	0	0	0	0	0	0	0	0	0		hypothetical protein
gene01065	0.54	0	0.41	0.316667	0	0	0	0	0.21	0.84	0.57	0.54	0.94	1.28	1.22	1.14667		hypothetical protein
gene01066	109.62	89.36	87.09	95.3567	83.83	100.44	78.88	87.7167	61.09	69.22	58.09	62.8	4.41	21.1	9.8	11.77		hypothetical protein
gene01067	159	81.5	74.05	104.85	90.31	118.79	95.82	101.64	71.91	71.13	60.5	67.8467	17.17	38.15	38.38	31.2333		hypothetical protein
gene01068	0	0.28	0	0.0933333	0.2	0.37	0.13	0.233333	0.22	0.06	0.13	0.136667	0.02	0.08	0.18	0.0933333		hypothetical protein
gene01069	0	0	0	0	0	0	0	0	0	0	0	0	0	0	0	0		hypothetical protein
gene01070	132.45	159.73	146.32	146.167	123.15	128.7	131.84	127.897	149.08	145.07	149.25	147.8	55.46	125.68	87.42	89.52		hypothetical protein
gene01071	0	0	0	0	0	0	0	0	0	0	0	0	0	0	0	0		tRNA-Glu
gene01072	0	0	0	0	0	0	0	0	0	0	0	0	0	0	0	0		zincin
gene01073	0.84	1.18	1.94	1.32	2.56	1.55	1.07	1.72667	1.82	1.72	2.82	2.12	0.15	0.54	0.15	0.28		hypothetical protein
gene01074	2.93	12.82	12.03	9.26	13.66	25.53	11.97	17.0533	15.69	15.63	10.16	13.8267	0.47	4.2	3.97	2.88		hypothetical protein
gene01075	0	3.16	1.07	1.41	0.5	0	0	0.166667	0	0	0.5	0.166667	0	0	0	0		hypothetical protein
gene01076	0	0	0	0	0	0	0	0	0	0	0	0	0	0	0	0		hypothetical protein
gene01077	0	0	0	0	0	0	0	0	0	0	0	0	0	0	0	0		hypothetical protein
gene01078	30.23	23.73	21.28	25.08	17.9	14.24	16.78	16.3067	20.36	17.84	18.92	19.04	6.09	18.33	16.27	13.5633	CRC1	mitochondrial carrier with solute carrier repeats
gene01079	11.77	15.91	17.23	14.97	12.58	12.81	11.74	12.3767	10.84	10.08	11.13	10.6833	2	5.96	3.28	3.74667		hypothetical protein
gene01080	64.71	56.87	69.66	63.7467	35.1	37.91	38.34	37.1167	35.32	31.2	31.26	32.5933	3.23	9.84	8.71	7.26		AB-hydrolase YheT
gene01081	496.09	347.06	270.46	371.203	221.42	229.52	265.37	238.77	261.89	253.19	263.73	259.603	108.27	166.27	293.64	189.393	mscL	gated mechanosensitive channel
gene01082	1.52	0.3	0.63	0.816667	0.44	1.28	0.43	0.716667	0.32	0.9	0.58	0.6	0.36	0.66	0.47	0.496667		hypothetical protein
gene01083	0	0	0	0	0	0	0	0	0	0	0	0	0	0	0.21	0.07		hypothetical protein
gene01084	0	0	0	0	0	0	0	0	0	0	0	0	0	0	0	0		hypothetical protein
gene01085	0	0	0	0	0	0	0	0	0	0	0	0	0.01	0	0	0.00333333		predicted protein
gene01086	0.73	2.07	1.74	1.51333	2.11	0.94	0.57	1.20667	1.86	0.93	0.95	1.24667	0.09	0.16	0.1	0.116667		hypothetical protein
gene01087	211.26	109.74	102.61	141.203	165.5	196.24	184.75	182.163	229.35	212.68	248.7	230.243	23.46	51.49	41.91	38.9533		hypothetical protein
gene01088	1.8	6.81	4.16	4.25667	2.18	3.43	1.18	2.26333	2.1	1.28	0	1.12667	1.11	3.87	0.89	1.95667		hypothetical protein
gene01089	22.39	21.9	20.76	21.6833	16.79	16.92	12.82	15.51	13.99	15.98	15.17	15.0467	6.94	15.01	12.32	11.4233		3-propionate hydroxylase
gene01090	8.78	14.88	14.24	12.6333	24.34	23.88	25.7	24.64	25.96	25.51	24.23	25.2333	1.89	4.86	3.85	3.53333		hypothetical protein
gene01091	0	0.09	0	0.03	0.09	0	0	0.03	0	0	0.09	0.03	0.06	0	0	0.02		hypothetical protein
gene01092	101.7	178.31	166.03	148.68	139.85	135.72	138.21	137.927	179.81	160.4	173.6	171.27	110.18	174.5	142.29	142.323		hypothetical protein
gene01093	34.6	40.43	32.26	35.7633	50.93	79.04	65.49	65.1533	42.49	57.5	32.84	44.2767	19.44	39.8	41.73	33.6567		hypothetical protein
gene01094	2.91	3.43	5.64	3.99333	4.06	6.75	13.74	8.18333	4.91	4.77	4.95	4.87667	0.11	0.33	0.36	0.266667		NAD(P)-binding protein
gene01095	2.71	3.84	5.29	3.94667	4.13	4.02	3.59	3.91333	4.51	3.75	3.79	4.01667	1.33	3.06	2.35	2.24667		hypothetical protein
gene01096	12.09	8.89	9.65	10.21	9.19	10.52	11.08	10.2633	11.25	8.88	10.67	10.2667	4.54	12.59	9.15	8.76		hypothetical protein
gene01097	0	0	0	0	0	0	0	0	0	0	0	0	0	0	0	0		NAD(P)-binding protein
gene01098	4.28	5.5	8.31	6.03	8.06	6.95	4.76	6.59	9.79	8.6	6.55	8.31333	2.95	8.5	5.12	5.52333		hypothetical protein
gene01099	0.84	1.08	1.23	1.05	0.94	0.96	1.25	1.05	0.53	0.77	0.63	0.643333	0.28	0.41	0.58	0.423333		hypothetical protein
gene01100	9.19	18.21	20.51	15.97	15.89	8.93	11.44	12.0867	13.48	10.29	8.89	10.8867	0.9	1.52	1.11	1.17667		Pkinase-domain-containing protein
gene01101	0.24	0.43	0.35	0.34	0.5	0.36	0.49	0.45	0.09	0.37	0	0.153333	0.08	0.05	0.05	0.06		hypothetical protein
gene01102	5.61	7.59	13.77	8.99	11.3	10.21	7.96	9.82333	10.55	11.58	6.17	9.43333	3.11	6.42	4.09	4.54		hypothetical protein
gene01103	68.9	88.58	81.45	79.6433	137.52	121.6	144.08	134.4	148.98	126.57	142.89	139.48	93.95	190.3	154.18	146.143		hypothetical protein
gene01104	47.18	46.78	33.27	42.41	30.34	22.7	26.49	26.51	22.46	23.47	17.52	21.15	6.09	18.96	16.71	13.92		hypothetical protein
gene01105	188.85	163.2	243.24	198.43	391.89	595.33	400.03	462.417	661.6	854.83	624.26	713.563	88.85	330.46	215.12	211.477		FAD/NAD(P)-binding domain-containing protein
gene01106	1.91	2.05	2.92	2.29333	2.62	2.56	2.03	2.40333	1.48	1.45	2.15	1.69333	0.63	0.95	0.91	0.83		hypothetical protein
gene01107	9.8	15.77	13.63	13.0667	15.56	15.89	16.21	15.8867	18.78	14.54	14.99	16.1033	4.26	13.74	6.87	8.29		hypothetical protein
gene01108	0.77	0.43	0.89	0.696667	0.83	0.9	0.81	0.846667	0.45	1.27	0.83	0.85	0.83	1.04	0.11	0.66		hypothetical protein
gene01109	4.67	6.82	8.67	6.72	5.34	2.72	3.71	3.92333	4.82	5.85	4.07	4.91333	1.16	3.11	1.88	2.05		hypothetical protein
gene01110	648.34	435.18	289.4	457.64	181.7	203.4	151.67	178.923	203.39	236.9	227.87	222.72	38.78	85.16	75.55	66.4967		NAD(P)-binding protein
gene01111	8.01	7.61	10.47	8.69667	15.27	14.64	10.69	13.5333	17.87	16.5	11.32	15.23	3.48	6.18	5.08	4.91333	mmuM	Homocysteine S-methyltransferase
gene01112	0	0	0	0	0	0	1.79	0.596667	0	0	1.94	0.646667	0	0	0	0		hypothetical protein
gene01113	116.52	243.66	207.59	189.257	238.2	262.85	217.96	239.67	335.73	365.03	329.28	343.347	4.93	15.26	8.18	9.45667		hypothetical protein
gene01114	9.52	12.04	7.62	9.72667	13.62	21.17	20.32	18.37	18.54	35.75	23.87	26.0533	1.69	3.86	3.04	2.86333		hypothetical protein
gene01115	8.87	9.41	9.27	9.18333	8.28	9.72	8.44	8.81333	9.08	8.92	7.56	8.52	2.2	2.87	3.42	2.83		diphthamide biosynthesis protein
gene01116	0.92	1.93	2.09	1.64667	1.87	1.05	0.73	1.21667	1.6	1.19	1.26	1.35	0.06	0.3	0.34	0.233333		hypothetical protein
gene01117	95.03	80.95	53.97	76.65	70.45	79.59	56.08	68.7067	89.7	87.79	73.76	83.75	36.26	83.6	77.59	65.8167		S-adenosyl-L-methionine-dependent methyltransferase
gene01118	7.73	13.08	16.83	12.5467	22.23	19.65	20.07	20.65	33.16	31.4	28.51	31.0233	15.49	27.29	20.34	21.04		hypothetical protein
gene01119	15.03	22.25	25.1	20.7933	29.83	25.82	28.81	28.1533	24.78	24.15	23.69	24.2067	3.13	7.64	6.08	5.61667		general substrate transporter
gene01120	2	2.17	4.5	2.89	3.16	2.3	1.84	2.43333	3.41	2.16	3.26	2.94333	1.54	3.45	2.71	2.56667		hypothetical protein
gene01121	45.32	76.12	98.75	73.3967	75	60.76	60.37	65.3767	67.83	59.31	59.93	62.3567	13.04	31.53	21.18	21.9167		clc channel
gene01122	64.43	130.02	166.17	120.207	203.05	212.24	209.52	208.27	219.21	174.82	177.18	190.403	44.37	120.49	73.8	79.5533		DUF1929-domain-containing protein
gene01123	4.43	8.07	13.03	8.51	3.9	3.54	4.61	4.01667	5.44	3.14	5.33	4.63667	1.56	4.28	3.72	3.18667		hypothetical protein
gene01124	0	0	0	0	0	0	0	0	0	0	0	0	0	0	0	0		tRNA-Gln
gene01125	627.26	549.08	615.17	597.17	474.64	606.65	1033.59	704.96	546.01	494.63	550.16	530.267	370.12	776.83	518.61	555.187		hypothetical protein
gene01126	92.19	80	71.92	81.37	65.77	62.69	62.12	63.5267	90.02	79.99	78.21	82.74	67.02	120.43	126.54	104.663	CWC24	hypothetical protein
gene01127	63.14	68.09	74.1	68.4433	50.53	55.84	57.84	54.7367	44.4	44.45	41.58	43.4767	8.99	29.31	22.09	20.13		hypothetical protein
gene01128	36.27	44.03	48.18	42.8267	43.25	45.64	59.59	49.4933	43.31	39.21	40.48	41	7.32	19.22	16.73	14.4233		hypothetical protein
gene01129	9.25	9.31	9.56	9.37333	6.89	6.56	5.25	6.23333	8.57	7.62	6.67	7.62	0.65	1.46	0.93	1.01333		general substrate transporter
gene01130	17.04	30.26	51.11	32.8033	26.01	27.22	24.31	25.8467	15.21	15.48	9.07	13.2533	0.5	0.95	0.46	0.636667		pleiotropic drug resistance ABC transporter
gene01131	26.98	23.98	23.33	24.7633	26.14	36.26	26.95	29.7833	30.83	33.25	31.45	31.8433	3.94	14.95	12.35	10.4133		hypothetical protein
gene01132	88.26	62.11	87.77	79.38	98.46	197.47	162.03	152.653	212.01	223.51	209.67	215.063	23.98	74.56	43.85	47.4633		CBD9-like protein
gene01133	0	0	0	0	0	0	0	0	0	0	0	0	0	0	0	0		hypothetical protein
gene01134	0	0	0	0	0	0	0	0	0	0	0	0	0	0.03	0	0.01		hypothetical protein
gene01135	0	0	0	0	0	0	0	0	0	0	0	0	0	0	0	0		hypothetical protein
gene01136	47.77	131.38	184.77	121.307	163.9	142.91	147.8	151.537	206.07	165.9	161.25	177.74	35.74	87.69	58.75	60.7267		G protein alpha-subunit
gene01137	0	0	0	0	0	0	0	0	0	0	0	0	0	0	0	0		hypothetical protein
gene01138	0	0	0	0	0	0	0	0	0	0	0	0	0	0	0	0		hypothetical protein
gene01139	0	0	0	0	0	0	0	0	0	0	0	0	0	0	0	0		hypothetical protein
gene01140	101.49	322.01	249.16	224.22	48.05	31.67	21.06	33.5933	10	5.38	3.29	6.22333	0.46	2.57	1.08	1.37		hypothetical protein
gene01141	206.68	146.29	152	168.323	67.22	74.72	85.1	75.68	34.96	32.46	28.19	31.87	5.25	11.08	19.26	11.8633		glycoside hydrolase family 16 protein
gene01142	4.25	4.08	4.82	4.38333	3.72	4.59	6.1	4.80333	5.7	5.96	5.93	5.86333	5.42	8.97	9.64	8.01		hypothetical protein
gene01143	403.85	448.11	404.97	418.977	310.79	229.39	276.69	272.29	312.69	267.63	253.92	278.08	121.58	240.7	192.95	185.077		CBD9-like protein
gene01144	0	0	0	0	0	0	0	0	0	0	0	0	0	0	0	0		hypothetical protein
gene01145	0	0	0	0	0	0	0	0	0	0	0	0	0	0	0	0		hypothetical protein
gene01146	0	0	0	0	0	0	0	0	0	0	0	0	0	0	0	0		hypothetical protein
gene01147	0	0	0	0	0	0	0	0	0	0	0	0	0	0	0	0		predicted protein
gene01148	0	0	0	0	0	0	0	0	0	0	0	0	0.1	0.1	0	0.0666667		hypothetical protein
gene01149	0	0	0	0	0	0	0	0	0	0	0	0	0	0	0	0		hypothetical protein
gene01150	0	0	0	0	0	0	0	0	0	0	0	0	0	0	0	0		hypothetical protein
gene01151	341.67	300.67	216.03	286.123	728.63	389.02	659.8	592.483	275.79	244.49	220.68	246.987	397.81	848.42	435.62	560.617		S-adenosyl-L-methionine-dependent methyltransferase
gene01152	32.25	17.07	13.24	20.8533	16.95	15.45	15.62	16.0067	13.83	10.1	11.92	11.95	2.81	4.23	3.96	3.66667		acyl-CoA N-acyltransferase
gene01153	5.18	12.53	15.19	10.9667	12.96	9.87	10.26	11.03	13.84	14.09	11.72	13.2167	4.65	7.98	7.4	6.67667		hypothetical protein
gene01154	4.62	7.59	7	6.40333	7.53	3.74	7	6.09	6.89	5.53	6.79	6.40333	4.5	6.63	4.88	5.33667		hypothetical protein
gene01155	97.34	92.88	105.74	98.6533	67.79	72.26	64.76	68.27	73.28	77.25	72.78	74.4367	22.58	56.41	44.54	41.1767		guanine nucleotide binding protein, alpha subunit
gene01156	71.21	134.29	124.85	110.117	259.09	311.65	403.23	324.657	118.31	74.83	125.27	106.137	0.79	1.16	0.35	0.766667		hypothetical protein
gene01157	16.26	12.47	13.23	13.9867	7.29	7.19	7.07	7.18333	5.74	7.62	6.51	6.62333	2.34	4.25	4.19	3.59333		FAD/NAD(P)-binding domain-containing protein
gene01158	4.13	10.33	11.64	8.7	10.09	5.74	9.69	8.50667	7.45	8.57	7.96	7.99333	2.11	3.55	3.81	3.15667		hypothetical protein
gene01159	1.53	3.29	3.41	2.74333	2.7	3.17	2.49	2.78667	2.92	4.22	2.75	3.29667	0.57	0.92	0.91	0.8		hypothetical protein
gene01160	8.36	4.18	5.11	5.88333	11.51	16.48	17.24	15.0767	24.5	23.4	27.8	25.2333	0.58	1.25	0.86	0.896667		hypothetical protein
gene01161	52.53	43.38	32.97	42.96	30.6	20.25	28.88	26.5767	20.5	16.08	17.03	17.87	7.99	15.67	13.63	12.43		oxidoreductase
gene01162	53.82	150.56	195.44	133.273	224.17	237.86	234.99	232.34	264.84	249.46	238.87	251.057	49.56	118.88	94.14	87.5267		P-loop containing nucleoside triphosphate hydrolase protein
gene01163	36.52	36.37	28.23	33.7067	30.94	24.07	26.47	27.16	23.13	19.8	21.55	21.4933	13.63	23.23	19.14	18.6667		hypothetical protein
gene01164	0	0	0	0	0	0	0	0	0	0	0	0	0	0	0	0		hypothetical protein
gene01165	0	0	0	0	0	0	0	0	0	0	0	0	0.03	0.06	0	0.03		hypothetical protein
gene01166	0	0	0	0	0	0	0	0	0	0	0	0	0.13	0.45	0.43	0.336667		DNA/RNA polymerase
gene01167	0	0	0	0	0	0	0	0	0	0	0	0	0	0	0	0		hypothetical protein
gene01168	0	0	0	0	0	0	0	0	0	0	0	0	0	0	0	0		hypothetical protein
gene01169	0	0	0	0	0	0	0	0	0	0	0	0	0	0	0	0		hypothetical protein
gene01170	0	0	0	0	0	0	0	0	0	0	0	0	0	0	0	0		hypothetical protein
gene01171	0	0	0	0	0	0	0	0	0	0	0	0	0	0.04	0	0.0133333		hypothetical protein
gene01172	0.37	0.67	0.63	0.556667	0.72	1.02	0.72	0.82	0.63	0.61	0.48	0.573333	0.1	0.14	0.08	0.106667		hypothetical protein
gene01173	0	0	0	0	0	0	0	0	0	0	0	0	0	0	0	0		hypothetical protein
gene01174	0	0	0	0	0	0	0	0	0.15	0.04	0	0.0633333	0	0	0	0		hypothetical protein
gene01175	0	0	0	0	0	0	0	0	0	0	0	0	0	0	0	0		hypothetical protein
gene01176	0	0	0	0	0	0	0	0	0	0	0	0	0	0	0	0		hypothetical protein
gene01177	0	0	0	0	0	0	0	0	0	0	0	0	0	0	0	0		hypothetical protein
gene01178	0	0	0	0	0	0	0	0	0	0	0	0	0	0	0	0		hypothetical protein
gene01179	0	0.1	0	0.0333333	0	0	0	0	0	0	0	0	0	0	0	0		hypothetical protein
gene01180	0	0	0	0	0	0	0	0	0	0	0	0	0	0	0	0		hypothetical protein
gene01181	0	0	0	0	0	0	0	0	0	0	0	0	0	0	0	0		hypothetical protein
gene01182	0	0	0	0	0	0	0	0	0	0	0	0	0	0	0	0		DNA/RNA polymerase
gene01183	0	0	0	0	0	0	0	0	0	0	0	0	0	0	0	0		hypothetical protein
gene01184	0	0	0	0	0	0	0	0	0	0	0	0	0	0	0	0		tRNA-Thr
gene01185	22.78	42.56	45.08	36.8067	45.22	43.72	54.24	47.7267	50.18	52.5	56.63	53.1033	12.58	27.92	34.16	24.8867		acid protease
gene01186	93.4	80.36	89.37	87.71	68.95	55.71	63.22	62.6267	75.12	67.32	69.08	70.5067	118.84	161.38	150.68	143.633		Metallo-dependent phosphatase
gene01187	0	0	0	0	0	0	0	0	0	0	0	0	0	0	0	0		hypothetical protein
gene01188	1.38	1.67	3.08	2.04333	2.7	1.98	2.62	2.43333	7.28	5.14	5.32	5.91333	2.52	10.78	9.3	7.53333		hypothetical protein
gene01189	3.16	7.52	8.01	6.23	6.46	4.75	4.35	5.18667	19.23	15.51	13.9	16.2133	2.24	14.27	7.97	8.16		hypothetical protein
gene01190	38.78	48.09	57.19	48.02	41.64	41.91	41.76	41.77	42.83	41.8	41.61	42.08	11.06	25.35	20.42	18.9433		hypothetical protein
gene01191	0.59	2.86	1.45	1.63333	2.29	2.04	2.76	2.36333	5.15	3.54	2.52	3.73667	0.29	0.64	0.14	0.356667		hypothetical protein
gene01192	2.27	1.77	0.45	1.49667	0	0.45	2.41	0.953333	0.91	1.84	0	0.916667	0.74	0.67	2.94	1.45		hypothetical protein
gene01193	406.02	217.93	159.33	261.093	143.98	88.22	169.61	133.937	150.63	162.8	151.86	155.097	98.36	163.39	168.63	143.46	rpmH	hypothetical protein
gene01194	7.41	16.2	21.72	15.11	16.45	10.92	13.62	13.6633	13.96	12.26	11.13	12.45	2.01	4.11	2.39	2.83667		hypothetical protein
gene01195	16.01	23.44	26.33	21.9267	18.87	12.61	20.18	17.22	12.33	8.92	6.58	9.27667	158.75	49.76	114.88	107.797		hypothetical protein
gene01196	3.8	7.98	10.85	7.54333	9.07	6.73	7.8	7.86667	9.94	9.49	6.7	8.71	5.64	5.41	6.96	6.00333		cytochrome P450
gene01197	49.45	56.73	51.28	52.4867	55.08	58.16	46.68	53.3067	46.8	46.4	44.31	45.8367	1.34	5.08	3.4	3.27333		riboflavin transporter MCH5
gene01198	0.99	0.48	0.12	0.53	0	0.13	0	0.0433333	0	0	0	0	0	0	0	0		hypothetical protein
gene01199	66.49	70.51	76.24	71.08	78.26	59.75	56.25	64.7533	54.82	53.46	53.73	54.0033	12.88	12.82	18.32	14.6733		MFS general substrate transporter
gene01200	36.87	34.87	42.7	38.1467	38.13	37.55	31.97	35.8833	39.89	38.2	35.4	37.83	27.03	52.19	45.68	41.6333		hypothetical protein
gene01201	3.62	4.55	6.38	4.85	2.51	5.19	3.59	3.76333	8.34	7.74	4.91	6.99667	0.85	2.17	1.15	1.39		hypothetical protein
gene01202	20.84	29.66	32.35	27.6167	42.24	48.83	49.89	46.9867	52.96	56.05	52.94	53.9833	2.1	3.39	2.7	2.73		hypothetical protein
gene01203	12.52	25.61	19.29	19.14	15.22	15.43	13.66	14.77	19.14	15.98	12.79	15.97	3.04	11.16	5	6.4		Pkinase-domain-containing protein
gene01204	27.93	32.97	32.35	31.0833	29.4	25.77	24.39	26.52	30.51	26.39	25.61	27.5033	6.42	21.19	14.98	14.1967	ADA2	hypothetical protein
gene01205	28.33	22.26	19.44	23.3433	20.24	22.05	27.66	23.3167	21.44	19.54	18	19.66	6.24	17.99	20.72	14.9833		casein kinase II catalytic subunit
gene01206	12.05	19.32	26.16	19.1767	20.1	19.33	17.86	19.0967	28.85	27.39	26.63	27.6233	2.65	7.94	5.27	5.28667		hypothetical protein
gene01207	1557.53	2343.62	2338.27	2079.81	1702.79	1141.05	1621.37	1488.4	1514.24	1222.94	1295.37	1344.18	464.66	1149.18	815.53	809.79	RPS18	ribosomal protein S13
gene01208	1.06	1.4	2.52	1.66	1.93	2.3	1.78	2.00333	2.41	1.38	1.85	1.88	0.64	2.34	1.36	1.44667		hypothetical protein
gene01209	43.49	57.49	67.26	56.08	70.86	63.73	62.19	65.5933	67.87	61.65	57.35	62.29	19.46	48.89	49.35	39.2333	pepP	Creatinase/aminopeptidase
gene01210	37.91	40.73	41.74	40.1267	35.82	32.43	35.05	34.4333	38.15	39.67	38.73	38.85	5.33	16.05	13.15	11.51		hypothetical protein
gene01211	0.37	0.88	1.3	0.85	2.57	0.93	0.38	1.29333	0.85	2.14	1.27	1.42	0.17	0.09	0.29	0.183333		hypothetical protein
gene01212	57.59	97.84	118.08	91.17	86.62	68.11	82.16	78.9633	96.58	85.02	87.96	89.8533	78.45	105.93	86.9	90.4267		GTP binding protein 4
gene01213	1.9	4.1	5.89	3.96333	4.28	2.69	3.03	3.33333	5.79	5.46	3.27	4.84	3.83	8.44	6.39	6.22		hypothetical protein
gene01214	38.3	96.44	81.26	72	46.66	39.08	36.46	40.7333	31.73	40.99	27.93	33.55	81.23	170.24	189.33	146.933		metalloprotease
gene01215	38.98	71.42	43.9	51.4333	60.61	53.76	61.64	58.67	74.98	71.57	62.77	69.7733	115.57	76.27	76.11	89.3167		metalloprotease
gene01216	21	53.44	74.34	49.5933	57.02	54.33	55.9	55.75	52.84	49.78	44.83	49.15	6.08	17.85	12.02	11.9833		hypothetical protein
gene01217	36.35	31.84	33.25	33.8133	21.17	22.37	23.12	22.22	29.12	26.43	24.36	26.6367	7.6	17.15	16.33	13.6933	BET5	snare-like protein
gene01218	0	0	0	0	0	0	0	0	0	0	0	0	0	0	0	0		hypothetical protein
gene01219	0	0	0	0	0	0	0	0	0	0	0	0	0	0	0	0		DDE-domain-containing protein
gene01220	0	0	0	0	0	0	0	0	0	0	0	0	0	0	0	0		hypothetical protein
gene01221	0	0	0	0	0	0	0	0	0	0	0	0	0	0	0	0		hypothetical protein
gene01222	0	0	0	0	0	0	0	0	0	0	0	0	0	0	0	0		hypothetical protein
gene01223	5.86	8.56	9.6	8.00667	7.42	6.27	7.32	7.00333	9.42	8.6	8.04	8.68667	2.73	6.9	5.46	5.03		hypothetical protein
gene01224	6.62	11	15.12	10.9133	14.18	14.45	19.82	16.15	15.03	15.58	15	15.2033	1.14	3.45	2.86	2.48333		hypothetical protein
gene01225	47.37	39.84	41.08	42.7633	63.51	101.85	63.22	76.1933	77.74	82.97	88.07	82.9267	7.85	32.97	32.36	24.3933		hypothetical protein
gene01226	0.6	0.64	0.42	0.553333	0.86	1.2	0.85	0.97	1.43	3.3	1.47	2.06667	1.09	1.7	0.89	1.22667		hypothetical protein
gene01227	12.45	10.52	16.65	13.2067	4.49	3.76	0.95	3.06667	1.62	0	0.99	0.87	0.14	0.52	0.25	0.303333		hypothetical protein
gene01228	94.64	222.64	262.14	193.14	189.73	183.56	142.52	171.937	121.83	89.09	85.1	98.6733	3.23	11.49	5.36	6.69333		hypothetical protein
gene01229	1.63	2.93	3.26	2.60667	2.64	2.05	1.65	2.11333	3.81	3.05	3.03	3.29667	1.16	2.78	1.4	1.78		subtilisin-like protein
gene01230	89.86	115.77	126.65	110.76	134.42	124.51	136.63	131.853	108.82	105.2	96.8	103.607	19.41	45.98	45.12	36.8367	alaS	hypothetical protein
gene01231	17.88	23.1	15.24	18.74	21.05	15.03	18	18.0267	19.84	8.07	11.19	13.0333	86.62	108.38	107.62	100.873		hypothetical protein
gene01232	5.17	9.68	15	9.95	15.56	15.27	12.33	14.3867	22.19	22.47	16.44	20.3667	0.87	2.45	2.12	1.81333		chondroitin AC/alginate lyase
gene01233	1.37	3.26	8.19	4.27333	7.57	5.98	5.67	6.40667	11.5	10.38	7.25	9.71	0.54	0.6	0.36	0.5		hypothetical protein
gene01234	1.95	2.67	3.13	2.58333	3.66	3.59	3.13	3.46	3.05	3.58	3.7	3.44333	0.23	0.52	0.46	0.403333		hypothetical protein
gene01235	0	0	0	0	0	0	0	0	0	0	0	0	0	0	0	0		hypothetical protein
gene01236	8.9	10.23	9.12	9.41667	5.95	5.69	5.44	5.69333	5.67	4.81	6.09	5.52333	1.37	4.26	3.01	2.88		hypothetical protein
gene01237	205.08	142.46	113.59	153.71	141.27	145.29	146.87	144.477	125.89	110.81	122.33	119.677	4.55	9.97	7.04	7.18667		hypothetical protein
gene01238	0	0	0	0	0	0	0	0	0	0	0	0	0	0	0	0		hypothetical protein
gene01239	0.33	1.82	1	1.05	1.41	0.51	0.69	0.87	0.51	0.72	0.35	0.526667	0	0	0.19	0.0633333		hypothetical protein
gene01240	7.67	11.36	10.41	9.81333	10.51	8.51	9.72	9.58	13.03	13.2	12.84	13.0233	3.72	5.92	5.92	5.18667		hypothetical protein
gene01241	117.91	99.24	85.13	100.76	141.98	130.27	132.12	134.79	225.47	225.02	214.83	221.773	37.73	60.98	56.43	51.7133	IFA38	NAD(P)-binding protein
gene01242	2093.3	1189.06	638.29	1306.88	540.09	588.55	386.47	505.037	108.7	71.13	78.38	86.07	15.61	63.37	55.94	44.9733		hypothetical protein
gene01243	20.12	30.35	34.08	28.1833	28.69	26.5	26.51	27.2333	28.64	26.14	23.69	26.1567	9.91	18.9	15.37	14.7267		Pkinase-domain-containing protein
gene01244	43.68	84.94	81.59	70.07	185.52	115.95	134.16	145.21	149.02	122.31	121.99	131.107	9.29	15.76	12.22	12.4233		composite domain of metallo-dependent hydrolase
gene01245	19.73	58.5	81.33	53.1867	71.8	58.06	73.56	67.8067	71.41	60.32	53.05	61.5933	10.36	33.58	19.71	21.2167		TRP-domain-containing protein
gene01246	2.91	5.38	3.5	3.93	8.83	5.5	10.19	8.17333	1.5	1.62	4.16	2.42667	0	0.49	0.23	0.24		hypothetical protein
gene01247	1.29	1.3	2.03	1.54	3.35	4.21	3.07	3.54333	3.5	3.74	3.52	3.58667	0.83	1.62	1.03	1.16		OPT superfamily oligopeptide transporter
gene01248	78.47	122.99	151.64	117.7	126.42	101.44	113.83	113.897	139.71	128.35	122.75	130.27	39.78	103.23	87.62	76.8767		eukaryotic translation initiation factor 3 domain-containing protein
gene01249	78.43	77.09	65.67	73.73	53.77	60.78	58.09	57.5467	81.5	81.72	92.66	85.2933	1.75	4.49	5.95	4.06333		NAD(P)-binding protein
gene01250	584.27	717.33	486.04	595.88	142.1	288.2	453.37	294.557	233.42	251.48	348.99	277.963	30.64	73.12	61.64	55.1333		hypothetical protein
gene01251	181.78	149.7	142.9	158.127	117.4	111.24	135.63	121.423	119.54	102.26	101.46	107.753	30.19	56.97	57	48.0533		alcohol oxidase
gene01252	169.82	283.78	324.72	259.44	237.71	256.49	212.08	235.427	205.1	210.94	190.47	202.17	86.37	134.27	92.62	104.42		MFS transporter, SP family, general alpha glucoside:H+ symporter
gene01253	75.05	93.48	88.96	85.83	55.19	37.68	48.81	47.2267	36.11	33.81	31.94	33.9533	16.38	38.12	22	25.5		hypothetical protein
gene01254	89.61	88.33	88.41	88.7833	69.78	58.72	64.96	64.4867	66.83	57.23	56.94	60.3333	16.26	38.33	30.53	28.3733		nucleotide-diphospho-sugar transferase
gene01255	1.07	1.35	1.33	1.25	1.64	0.5	1.43	1.19	1.98	1.5	0.78	1.42	1.29	2.23	2.44	1.98667		MFS general substrate transporter
gene01256	37.82	47.43	53.17	46.14	39.64	36.66	37.52	37.94	41.21	35.62	35.46	37.43	10.43	24.56	20.76	18.5833		hypothetical protein
gene01257	16.46	16.12	18.45	17.01	15.71	17.76	24.57	19.3467	15.5	18.25	16.28	16.6767	5.6	12.63	9.76	9.33		hypothetical protein
gene01258	18.02	43.72	67.65	43.13	59.14	94.37	116.55	90.02	64.61	54.18	56.19	58.3267	4.14	13.59	6.79	8.17333		hypothetical protein
gene01259	9.27	9.21	10.95	9.81	29.94	26.39	22.92	26.4167	21.96	17.44	17.34	18.9133	1.77	3.21	3	2.66		hypothetical protein
gene01260	0	0	0	0	0	0	0	0	0	0	0	0	0	0	0	0		hypothetical protein
gene01261	1406.04	1307.06	1431.35	1381.48	6390.59	9046.16	6300.82	7245.86	6218.91	6956.46	8478.03	7217.8	70.34	223.67	138.26	144.09		carbohydrate-binding module family 12 protein
gene01262	0	0	0	0	0	0	0	0	0	0	0	0	0.23	0.28	0.13	0.213333		hypothetical protein
gene01263	23.1	20.37	21.95	21.8067	20.33	17.02	20	19.1167	18.22	15.62	15.83	16.5567	1.66	4.25	3.16	3.02333		hypothetical protein
gene01264	0	0	0	0	0	0	0	0	0	0	0	0	0	0	0	0		hypothetical protein
gene01265	12.83	16.41	23.93	17.7233	12.67	13.35	11.54	12.52	13.15	15.3	13.73	14.06	1.6	5.12	3.23	3.31667	MIO	hypothetical protein
gene01266	29.96	30.55	35.05	31.8533	21.19	22.3	21.92	21.8033	26.92	25.9	25.79	26.2033	6.29	16.38	12.37	11.68		seven-hairpin glycosidase
gene01267	22.62	20.06	18.3	20.3267	23.96	36.21	29.5	29.89	32	26.47	27.28	28.5833	1.64	2.55	3.42	2.53667		cytochrome P450
gene01268	39.82	46.93	51.6	46.1167	44.88	44.2	48.38	45.82	39.75	41.16	42.86	41.2567	32.54	72.98	70.86	58.7933		DUF803-domain-containing protein
gene01269	41.9	46.12	45.66	44.56	47.59	47.54	46.63	47.2533	48.76	46.32	45.76	46.9467	14.03	26.47	26.58	22.36		general substrate transporter
gene01270	3.13	7.99	7.05	6.05667	6.48	4.86	4.82	5.38667	4.43	2.2	3.4	3.34333	2.29	3.88	1.97	2.71333		hypothetical protein
gene01271	9.77	19.14	31.42	20.11	19.44	16.8	18.3	18.18	19.28	17.97	14.66	17.3033	5.79	13.3	8.03	9.04		hypothetical protein
gene01272	11.46	17.08	14.91	14.4833	13.36	10.41	10.56	11.4433	18.7	15.15	11.06	14.97	5.83	13.01	8.83	9.22333		putative GPI anchored protein
gene01273	35.14	32.07	27.75	31.6533	27.89	25.99	23.52	25.8	33.27	26.34	28.56	29.39	16.84	17.74	19.42	18		Six-hairpin glycosidase
gene01274	3.2	10.76	20.73	11.5633	16.83	17.17	14.46	16.1533	28.48	27.94	26.47	27.63	3.42	10.18	6.38	6.66		hypothetical protein
gene01275	446.59	897.08	969.62	771.097	1013.33	1119.33	1063.44	1065.37	1071.92	1054.22	1121.1	1082.41	203.33	471.89	315.62	330.28		hypothetical protein
gene01276	115	93.8	100.38	103.06	72.27	65.76	74.32	70.7833	65.23	59.88	63.33	62.8133	39.92	88.57	70.76	66.4167		hypothetical protein
gene01277	3.91	12.14	28.26	14.77	23.93	22.44	23.61	23.3267	22.62	23	16.7	20.7733	1.15	3.88	2.97	2.66667		hypothetical protein
gene01278	7	13.77	20.07	13.6133	18.09	17.72	16.67	17.4933	20.12	19.19	15.97	18.4267	5.02	13.28	8.73	9.01		L domain-like protein
gene01279	6.83	3.45	1.4	3.89333	3.25	2.09	2.45	2.59667	2.11	3.4	6.46	3.99	6.25	20.73	8.71	11.8967		hypothetical protein
gene01280	32.76	64.34	94.33	63.81	68.91	87.71	65.9	74.1733	93.03	86.45	71.93	83.8033	27.53	70.03	34.63	44.0633		hypothetical protein
gene01281	33.18	50.38	55.07	46.21	44.87	49.15	74.75	56.2567	35.63	42.53	36.65	38.27	8.82	24.71	10.93	14.82		alpha/beta-hydrolase
gene01282	517.8	461.2	361.06	446.687	1089.82	1308.05	999.98	1132.62	579.12	658.6	668.85	635.523	80.16	114.1	120.1	104.787		class II aldolase/adducin domain-containing protein
gene01283	1.35	1.2	0.69	1.08	2.46	1.27	1.02	1.58333	0.98	0.46	0.64	0.693333	0.2	0.73	0.21	0.38		hypothetical protein
gene01284	27.73	30.07	31.8	29.8667	23.71	21.34	19.44	21.4967	23.65	24.61	24.05	24.1033	4.62	11.19	8.41	8.07333		hypothetical protein
gene01285	165.28	139.68	122.7	142.553	144.97	136.69	134.11	138.59	146.49	140.3	142.24	143.01	19.58	72.94	59.35	50.6233		BAR-domain-containing protein
gene01286	77.69	78.94	92.35	82.9933	76.94	69.24	68.98	71.72	82.29	81.2	74.79	79.4267	18.34	39.24	29.89	29.1567		hypothetical protein
gene01287	23.41	21.49	22.94	22.6133	32.39	25.19	25.63	27.7367	46.1	42.08	40.59	42.9233	3.72	6.94	6.21	5.62333		hypothetical protein
gene01288	0	0	0.95	0.316667	0.89	0.28	0.25	0.473333	1.1	0.67	0.25	0.673333	0.6	0.5	0.61	0.57		hypothetical protein
gene01289	11.94	23.92	36.64	24.1667	42.74	32.42	31.8	35.6533	37.98	34.51	28.55	33.68	1.16	3.23	1.72	2.03667	purL	phosphoribosylformylglycinamidin
gene01290	9.09	16.4	29.55	18.3467	16.75	16.77	17.4	16.9733	19.87	18.92	15.88	18.2233	3.68	9.93	8.12	7.24333		hypothetical protein
gene01291	61.37	85.75	95.56	80.8933	110.87	103.95	107.37	107.397	116.35	102.58	99.86	106.263	35.31	87.78	68.17	63.7533		hypothetical protein
gene01292	77.47	117.84	126.55	107.287	114.14	89.63	106.48	103.417	99.54	89.98	91.86	93.7933	35.8	74.95	71.73	60.8267	lysS	lysyl-tRNA synthetase
gene01293	28.3	45.11	55.91	43.1067	44.48	39.95	41.6	42.01	58.92	55.6	47.11	53.8767	7.32	16.88	13.02	12.4067	SEC34	cis-golgi transport vesicle tethering complex subunit
gene01294	145.81	176.24	116.69	146.247	62.89	46	58.8	55.8967	84.84	84.2	83.4	84.1467	31.15	55.85	52.6	46.5333		radical SAM enzyme
gene01295	308.09	215.98	295.78	273.283	292.48	407.91	319.52	339.97	271.34	395.88	418.19	361.803	8.9	21.95	18.19	16.3467	gst	hypothetical protein
gene01296	0	0	0	0	0	0	0	0	0	0	0	0	0	0	0	0		hypothetical protein
gene01297	0	0	0	0	0	0	0	0	0	0	0	0	0	0	0	0		hypothetical protein
gene01298	0	0	0	0	0	0	0	0	0	0	0	0	0	0	0	0		hypothetical protein
gene01299	0	0	0	0	0	0	0	0	0	0	0	0	0	0	0	0		hypothetical protein
gene01300	0	0	0	0	0	0	0	0	0	0	0	0	0.03	0	0	0.01		hypothetical protein
gene01301	0	0	0	0	0	0	0	0	0	0	0	0	0	0	0	0		hypothetical protein
gene01302	51.5	84.14	77.5	71.0467	85.53	77.42	95.57	86.1733	93.32	84.92	92.59	90.2767	10	22.29	20.87	17.72		hypothetical protein
gene01303	87.78	90.1	77.51	85.13	90.56	96.76	90.81	92.71	107.92	112.85	121.74	114.17	10.05	19.27	17.27	15.53	gst	glutathione S-transferase
gene01304	3.34	5.2	6.51	5.01667	6.16	5.3	3.82	5.09333	9.4	6.74	5.18	7.10667	1.77	5.72	4.63	4.04		hypothetical protein
gene01305	53.73	44.14	44.66	47.51	25.6	19.66	23.06	22.7733	26.98	23.58	19.74	23.4333	2.57	5.05	3.31	3.64333		DUF803-domain-containing protein
gene01306	104.44	57.68	33.47	65.1967	35.53	34.46	53.64	41.21	39.53	48.46	62.43	50.14	9.35	20.34	25.85	18.5133	gloA	glyoxalase I
gene01307	28.7	43.93	47.22	39.95	48.55	47.61	48.84	48.3333	48.55	50.52	49.64	49.57	8.41	25.24	21.59	18.4133		hypothetical protein
gene01308	0	0	0	0	0	0	0	0	0	0	0.69	0.23	0	0	0	0		hypothetical protein
gene01309	16.53	26.5	33.46	25.4967	30.51	27.84	26.29	28.2133	41.35	44.21	39.96	41.84	3.06	9.3	6.27	6.21		alpha/beta-hydrolase
gene01310	0	0	0	0	0	0	0	0	0	0	0	0	0	0	0	0		hypothetical protein
gene01311	13.44	28.38	32.78	24.8667	36.19	31.85	35	34.3467	33	27.52	24.61	28.3767	6.52	15.39	8.94	10.2833		hypothetical protein
gene01312	11.95	12.28	10.18	11.47	11.67	6.65	10.71	9.67667	13.58	14.03	13.4	13.67	12.2	21.07	23.33	18.8667	RPP21	Rpr2-domain-containing protein
gene01313	48.42	34.31	34.47	39.0667	34.06	37.7	37.2	36.32	40.61	38.56	32.86	37.3433	3.52	10.02	7.48	7.00667		yippee-domain-containing protein
gene01314	11.47	34.55	47.75	31.2567	38.01	36.81	36.45	37.09	45.14	40.66	36.56	40.7867	5.51	16.52	10.3	10.7767	CCR4	glucose-repressible alcohol dehydrogenase transcriptional effector
gene01315	29.31	10.03	0	13.1133	0	43.39	0	14.4633	0	7.46	0	2.48667	23.23	50.82	73.28	49.11	POLR2K	hypothetical protein
gene01316	7.05	1.23	2.93	3.73667	3.12	2.52	1.48	2.37333	9.67	15.65	6.2	10.5067	567.72	669.68	614.71	617.37		small heat shock protein
gene01317	6.24	5.63	7.46	6.44333	13.56	14.7	10.85	13.0367	10	11.15	10.22	10.4567	8.73	16.03	13.72	12.8267		hypothetical protein
gene01318	140.13	206.63	230.69	192.483	293.4	291.85	303.02	296.09	326.43	321	316.29	321.24	24.93	96.58	56.82	59.4433	mvaD	Diphosphomevalonate decarboxylase
gene01319	177.12	187.82	206.53	190.49	196.42	154.08	162.45	170.983	148.84	128.4	126.72	134.653	14.48	34.64	24.27	24.4633		S-adenosyl-L-methionine-dependent methyltransferase
gene01320	20.03	16.34	15.75	17.3733	15.58	9.51	11.06	12.05	9.14	6.91	8.66	8.23667	4.96	11.59	8.4	8.31667		alpha/beta-hydrolase
gene01321	101.94	101.88	115.58	106.467	92.07	46.25	55.56	64.6267	80.99	83.42	86.78	83.73	35.41	64.86	60.91	53.7267		hypothetical protein
gene01322	9.09	18.48	21.51	16.36	34.2	37.34	37.79	36.4433	27.55	30.57	23.71	27.2767	4.9	15.35	11.55	10.6		hypothetical protein
gene01323	10.81	13.53	13.48	12.6067	9.37	9.81	10.1	9.76	9.4	8.56	8.4	8.78667	2.72	7.13	4.27	4.70667		hypothetical protein
gene01324	12.85	17.04	15.94	15.2767	9.71	9.65	8.77	9.37667	9.58	10.74	7.72	9.34667	3	8.22	7.39	6.20333		hypothetical protein
gene01325	33.21	41.08	51.45	41.9133	38.61	33.26	33.05	34.9733	39.99	36.18	28.64	34.9367	5.9	16.9	10.86	11.22		hypothetical protein
gene01326	5.42	7.37	7.92	6.90333	8.86	8.41	7.44	8.23667	11.12	11.79	10.6	11.17	1.27	3.28	2.47	2.34		alpha/beta-hydrolase
gene01327	172.52	321.24	362.53	285.43	399.22	422.94	403.27	408.477	523.44	474.86	431.97	476.757	79.11	257.91	140.59	159.203		hypothetical protein
gene01328	78.41	105.58	125.21	103.067	85.96	68.84	73.28	76.0267	94.02	81.03	76.6	83.8833	12.07	29.91	23.56	21.8467		hypothetical protein
gene01329	170.46	252.19	218.98	213.877	302.81	301.19	286.34	296.78	277.66	281.27	270.78	276.57	24.27	49.3	40.49	38.02		hypothetical protein
gene01330	122.82	147.84	174.44	148.367	232.4	168.24	248.87	216.503	255.84	201.06	201.84	219.58	134.28	347.73	220.28	234.097		cytochrome c peroxidase
gene01331	6.86	5.84	8.53	7.07667	6.74	3.95	4.78	5.15667	5.4	5.43	5	5.27667	2.06	4.83	3.64	3.51		subtilisin-like protein
gene01332	219.28	89.98	72.47	127.243	104.1	102.03	81.5	95.8767	79.76	87.55	70.73	79.3467	19.73	44.96	42.52	35.7367		Prefoldin, subunit 4
gene01333	56.55	66.9	81.57	68.34	70.39	59.01	73.03	67.4767	73.3	78.59	69.96	73.95	15.19	28.62	20.33	21.38		hypothetical protein
gene01334	51.37	71.8	68.08	63.75	57.78	56.68	74.51	62.99	62.02	60.55	72.83	65.1333	13.03	24.54	22.79	20.12	cdsA	hypothetical protein
gene01335	77.56	127.38	171.21	125.383	104.77	84.95	91.59	93.77	103.28	94.55	81.87	93.2333	18.97	46.26	29.94	31.7233		hypothetical protein
gene01336	37.13	47.56	52.21	45.6333	40.55	48.36	37.89	42.2667	70.82	87.6	54.53	70.9833	32.66	88.17	66.47	62.4333		hypothetical protein
gene01337	42.33	42.67	48	44.3333	34.78	34.92	35.03	34.91	47.42	49.23	42.67	46.44	18.37	36.03	28.72	27.7067		hypothetical protein
gene01338	52.67	51.43	54.69	52.93	47.29	48.6	44.86	46.9167	77.35	86.6	69.09	77.68	33.72	62.61	53.04	49.79		hypothetical protein
gene01339	111.48	276.63	451.6	279.903	457.91	408.08	409.2	425.063	372.87	341.22	313.83	342.64	49.13	102.65	69.62	73.8		hypothetical protein
gene01340	16.07	31.13	43.07	30.09	23.71	20.21	23.13	22.35	29.89	31.21	26.24	29.1133	5.98	18.3	13.03	12.4367		cell division cycle protein 91
gene01341	1971.04	2404.69	2308.95	2228.23	1728.49	1152.74	1580.23	1487.15	1646.86	1419.22	1424.03	1496.7	574.41	1437.86	1164.92	1059.06	RPS23	ribosomal protein S12/S23
gene01342	84.37	101.73	128.58	104.893	58.31	54.84	60.23	57.7933	51.82	49.77	52.6	51.3967	13.45	29.48	24.91	22.6133		SET domain-containing protein
gene01343	236.54	144.81	132.13	171.16	95.25	77.31	87.48	86.68	99.36	86.86	94.69	93.6367	54.52	117.17	110.34	94.01	rpsO	hypothetical protein
gene01344	63.52	59.16	55.58	59.42	39.12	32.42	29.27	33.6033	41.58	42.23	43.31	42.3733	17.43	44.12	37.47	33.0067		hypothetical protein
gene01345	15.39	22.53	29.93	22.6167	17.79	18.24	19.72	18.5833	18.14	19.86	17.41	18.47	6.21	19.4	12.97	12.86		hypothetical protein
gene01346	38.16	35.72	39.57	37.8167	31.78	21.11	29.07	27.32	27.9	26.64	26.5	27.0133	3.89	12.36	8.35	8.2	tyrS	hypothetical protein
gene01347	16.85	16.08	18.94	17.29	21.88	19.98	21.21	21.0233	20.39	21.02	17.34	19.5833	3.19	6.34	7.95	5.82667	tgt	Queuine tRNA-ribosyltransferase
gene01348	17.51	29.91	41.19	29.5367	24.27	18.68	21.96	21.6367	25.75	20.2	20.57	22.1733	6.99	17.31	11.62	11.9733	DBP10	DEAD-domain-containing protein
gene01349	142.19	159.05	144.81	148.683	126.77	110.01	138.52	125.1	157.99	136.16	146.86	147.003	17.95	47.45	36.27	33.89	RPN7	PCI-domain-containing protein
gene01350	24.25	24.61	23.99	24.2833	19.24	16.27	20.29	18.6	15.93	14.01	17.44	15.7933	5.1	13.59	12.08	10.2567		CNH-domain-containing protein
gene01351	28.3	38.79	34.66	33.9167	29.3	33.22	36.17	32.8967	33.27	27.8	29.65	30.24	15.86	39.18	33.37	29.47		hypothetical protein
gene01352	81.75	62.06	62.39	68.7333	59.7	52.92	53.42	55.3467	64.14	53.52	46.07	54.5767	25.29	47.99	44.32	39.2		chromatin associated protein KTI12
gene01353	78.61	50.15	68.54	65.7667	13.86	12.21	7.16	11.0767	5.07	3.94	3.45	4.15333	1.32	3.62	1.5	2.14667		hypothetical protein
gene01354	19.83	16.29	18.51	18.21	44.49	72.12	81.63	66.08	21.23	20.16	19.53	20.3067	4.56	8.62	7.94	7.04		hypothetical protein
gene01355	13.97	15.6	1.66	10.41	10.76	23.01	18.01	17.26	26.57	19.42	9.15	18.38	3	3.44	3.61	3.35		hypothetical protein
gene01356	28.79	39.79	59.9	42.8267	42.88	35.32	33.59	37.2633	58.18	52.54	43.44	51.3867	13.94	40.82	26.33	27.03	ISWI	SNF2 family DNA-dependent ATPase
gene01357	175.89	150.4	145.63	157.307	133.99	130.09	124.91	129.663	121.67	108.45	110.3	113.473	17.59	52.72	38.44	36.25		hypothetical protein
gene01358	24.61	21.81	19.8	22.0733	18.64	16.52	15.91	17.0233	19.26	17.96	15.62	17.6133	7.47	19.97	20.44	15.96		hypothetical protein
gene01359	22.73	29.83	31.5	28.02	25.63	19.66	23.19	22.8267	27.93	23.53	24.24	25.2333	3.2	8.28	6.34	5.94		hypothetical protein
gene01360	18.05	29.82	23.02	23.63	23.33	24.92	32.26	26.8367	29.15	19.05	23.39	23.8633	4.77	12.35	8.64	8.58667		hypothetical protein
gene01361	12.62	39.67	55.56	35.95	59.27	53.13	49.55	53.9833	59.27	48.5	45.83	51.2	3.14	7.45	4.63	5.07333		NLI interacting factor-like phosphatase
gene01362	25.14	60.71	71.22	52.3567	65.27	67.05	75.37	69.23	62.26	55.97	51.04	56.4233	15.14	36.31	25.95	25.8		hypothetical protein
gene01363	300.42	171.33	143.74	205.163	131.4	101.6	131.35	121.45	118.98	119.46	76.6	105.013	107.85	190.12	186.33	161.433	TIM16	hypothetical protein
gene01364	2.09	1.86	2.61	2.18667	2.65	2.04	2.05	2.24667	2.3	2.29	1.64	2.07667	1.79	2.33	3.18	2.43333		hypothetical protein
gene01365	102.35	53.69	60.6	72.2133	32.79	28.51	31.63	30.9767	36.93	32.29	25.14	31.4533	16.79	38.54	37.35	30.8933		hypothetical protein
gene01366	45.53	28.23	23.65	32.47	27.4	34.44	32.71	31.5167	31.66	38.39	37.85	35.9667	8.79	16.25	24.23	16.4233		hypothetical protein
gene01367	17.73	29.36	37.97	28.3533	27.14	24.95	26.03	26.04	29.95	26.43	24.95	27.11	3.28	9.14	5.59	6.00333		RhoGAP-domain-containing protein
gene01368	11.57	17.14	20.81	16.5067	15.77	14.11	14.49	14.79	15.69	13.67	14.16	14.5067	13.34	66.6	16.91	32.2833		hypothetical protein
gene01369	108.57	144.92	142.98	132.157	102.32	92.48	92.33	95.71	107.16	93.82	90.14	97.04	15.75	45.48	36.84	32.69	RAD21	hypothetical protein
gene01370	25.85	52.76	68.45	49.02	64.9	39.1	53.91	52.6367	51.88	41.15	26.01	39.68	2.92	6.51	4.78	4.73667		acid protease
gene01371	17.64	24.27	38.95	26.9533	31.38	28.1	28.45	29.31	32.15	30.1	27.52	29.9233	2.96	8.15	6.32	5.81		ARM repeat-containing protein
gene01372	3.7	2.6	2.68	2.99333	3.75	3.53	5.58	4.28667	7.28	8.32	3.98	6.52667	8.28	11.93	9.36	9.85667		hypothetical protein
gene01373	22.87	38.15	41.13	34.05	30.63	33.35	32.58	32.1867	28.05	27.14	28.5	27.8967	5.05	14.06	11.43	10.18		cation efflux protein
gene01374	51.69	64.8	63.23	59.9067	56.68	52.79	78.15	62.54	49.12	52.37	62.13	54.54	18.67	42.7	42.5	34.6233		hypothetical protein
gene01375	85.83	91.74	96.9	91.49	93.98	76.94	92.29	87.7367	118.4	112.99	116.97	116.12	15.17	33.34	36.09	28.2		calcium-dependent phosphotriesterase
gene01376	977.31	996.47	942.17	971.983	691.17	457.97	612.44	587.193	716.96	599.33	577.95	631.413	267.47	603.43	501.99	457.63	RPS2	ribosomal protein S2
gene01377	126.95	253.15	221.51	200.537	248.19	253	245.2	248.797	274.05	249.49	225.49	249.677	77.62	217.39	160.16	151.723		hypothetical protein
gene01378	12.68	18.71	24.52	18.6367	19.7	13.56	13.9	15.72	15.47	14.57	12.72	14.2533	3.71	6.93	4.18	4.94		Dna2-domain-containing protein
gene01379	508.45	622.02	571.2	567.223	540.02	559.3	599.27	566.197	520.16	541.05	515.01	525.407	97.48	227.08	165.68	163.413		glutamate binding protein
gene01380	36.89	34.48	33.49	34.9533	25.4	23.18	24.74	24.44	23.27	21.73	16.97	20.6567	5.01	13.72	11.26	9.99667		hypothetical protein
gene01381	61.52	68.96	72.89	67.79	72.85	76.34	71.98	73.7233	72.43	75.13	62.24	69.9333	12.95	28.7	28.69	23.4467		hypothetical protein
gene01382	93.14	139.57	143.13	125.28	179.58	187.93	163.96	177.157	177.76	175.26	163.91	172.31	13.38	28.66	19.12	20.3867		alcohol dehydrogenase IV
gene01383	0	0	0	0	0	0	0	0	0	0	0	0	0	0	0	0		hypothetical protein
gene01384	0	0	0	0	0	0	0	0	0	0	0	0	0	0	0	0		hypothetical protein
gene01385	0	0	0	0	0	0	0	0	0	0	0	0	0	0	0	0		hypothetical protein
gene01386	0	0	0	0	0	0	0	0	0	0	0	0	0	0	0	0		hypothetical protein
gene01387	13.93	20.58	27.86	20.79	20.36	22.44	21.3	21.3667	20.78	20.69	17.52	19.6633	3.14	9.51	5.59	6.08	TTC37	TPR-like protein
gene01388	8.78	14.17	20.86	14.6033	18.5	15.15	14.76	16.1367	21.93	18.21	16.08	18.74	2	6.21	3.87	4.02667		ankyrin
gene01389	16.6	19.57	21.84	19.3367	15.29	13.7	13.19	14.06	14.42	12.8	11.36	12.86	2.88	7.53	5.66	5.35667		cytochrome-450 hydroxylase
gene01390	944.71	817.94	692.58	818.41	830.47	901.85	924.78	885.7	854.53	880.22	901.72	878.823	183.91	440.05	337.39	320.45		polyubiquitin
gene01391	10.16	14.45	17.94	14.1833	15.59	10.41	12.04	12.68	14.81	11.86	11.23	12.6333	2.4	5.69	5.13	4.40667		kinase-like protein
gene01392	32.71	40.84	40.07	37.8733	23.63	22.46	25.32	23.8033	21.31	18.68	20.66	20.2167	8.5	19.27	20.43	16.0667	NOL12	hypothetical protein
gene01393	90.31	106.97	108.55	101.943	104.63	95.47	105.24	101.78	91.18	91.21	83.04	88.4767	12.85	32.68	23.3	22.9433		hypothetical protein
gene01394	8.32	17.84	28.54	18.2333	19.3	18.7	21.46	19.82	19.83	18.42	14.22	17.49	6.2	15.14	12.5	11.28		hypothetical protein
gene01395	75.26	90.61	97.66	87.8433	94.09	92.95	92.96	93.3333	84.88	78.81	86.06	83.25	44.24	100.82	71.44	72.1667		Ca-transporting ATPase
gene01396	64.24	64.03	57.32	61.8633	71.64	72.37	67.21	70.4067	51.12	42.14	43.95	45.7367	13.21	30.58	35.16	26.3167		hypothetical protein
gene01397	74.69	89.43	98.97	87.6967	76.04	58.36	61.3	65.2333	80.6	71.62	61.68	71.3	40.35	84.61	76.24	67.0667	CHCHD4	hypothetical protein
gene01398	22.93	60.56	83.17	55.5533	75.51	65.91	65.78	69.0667	97.12	88.91	82.81	89.6133	10.49	22.22	18.32	17.01		hypothetical protein
gene01399	400.32	382.64	411.6	398.187	390.11	289.15	452.77	377.343	410.88	374.25	360.41	381.847	426.27	944.1	767.64	712.67		hypothetical protein
gene01400	35.87	44.42	49.91	43.4	38.46	25.87	33.04	32.4567	35.23	35.37	30.49	33.6967	1.57	5.49	4.49	3.85	thyA	thymidylate synthase
gene01401	35.38	64.31	95.54	65.0767	87.04	84.45	85.23	85.5733	84.97	83.6	82.93	83.8333	13.02	33.13	26.37	24.1733	RENT2	ARM repeat-containing protein
gene01402	19.08	37.2	41.12	32.4667	40.55	38.7	37.78	39.01	37.78	34.37	27.62	33.2567	13.21	19.38	14.2	15.5967		phosphatases II
gene01403	6.32	13.72	17.24	12.4267	10.92	7.17	8.31	8.8	9.14	7.42	6.79	7.78333	1.31	2.62	0.81	1.58		hypothetical protein
gene01404	4.71	9.94	22.62	12.4233	17.42	16.77	17.25	17.1467	26.4	27.4	24.7	26.1667	0.91	1.68	1.23	1.27333		hypothetical protein
gene01405	922.91	498.26	441.01	620.727	490.29	503.62	531.78	508.563	351.44	357.15	351.73	353.44	26.65	69.36	73.87	56.6267		hypothetical protein
gene01406	11.77	16.71	30.14	19.54	32.61	26.61	21.11	26.7767	31.82	27.97	26.95	28.9133	10.18	25.36	20.95	18.83		hypothetical protein
gene01407	3.89	12.5	20.82	12.4033	17	13.66	14.3	14.9867	19.25	19.24	13.4	17.2967	2.36	7.09	4.88	4.77667		hypothetical protein
gene01408	40.72	45.95	48.25	44.9733	36.79	30.57	30.43	32.5967	34.01	30.43	35.07	33.17	13.7	21.58	17.83	17.7033		nuclear mRNA splicing protein
gene01409	45.24	68.49	69.63	61.12	70.79	60.19	68.04	66.34	75.09	59.91	60.66	65.22	5.69	13.66	8.87	9.40667	CD224	gamma-glutamyltranspeptidase
gene01410	15.88	33.05	40.82	29.9167	35.16	32.58	31.89	33.21	29.32	27.61	24.05	26.9933	4.04	12.18	9.25	8.49		HbrB-domain-containing protein
gene01411	59.75	59.78	62.16	60.5633	51.34	42.38	40.23	44.65	44.5	44.01	41.9	43.47	12.36	32.37	24.05	22.9267	tsaD	peptidase M22, glycoprotease
gene01412	52.2	49.66	54.27	52.0433	45.23	38.34	46.17	43.2467	46.49	42.79	39.32	42.8667	17.45	36.41	35.98	29.9467		hypothetical protein
gene01413	61.19	67.18	69.47	65.9467	58.51	59.84	56.78	58.3767	75.36	64.25	65.12	68.2433	27.17	62.7	53.02	47.63		hypothetical protein
gene01414	0	0	7.69	2.56333	0	0	0	0	0	0	0	0	2.47	4.26	4.08	3.60333		small heat shock protein
gene01415	9.77	13.66	22.82	15.4167	13.93	14.92	13.78	14.21	13.74	16.46	13.45	14.55	2.11	6.51	4.53	4.38333		hypothetical protein
gene01416	39.64	65.6	85.11	63.45	67.92	77.43	76.57	73.9733	51.66	54.06	49.55	51.7567	2.06	5.98	2.88	3.64		glutamate-cysteine ligase catalytic subunit
gene01417	111.14	93.03	106.89	103.687	80.63	68.2	76.88	75.2367	69.47	65.31	57.27	64.0167	13.57	36.7	30.25	26.84		RabGAP/TBC
gene01418	7.93	7.43	9.02	8.12667	4.42	3.81	2.95	3.72667	5.72	3.47	4.83	4.67333	0	1.16	0.66	0.606667		RNA polymerase II transcriptional coactivator, putative
gene01419	12.78	24.19	31.46	22.81	27.58	23.79	19.4	23.59	27.42	24.76	24	25.3933	9.13	28.06	21.53	19.5733		hypothetical protein
gene01420	14.35	39.37	81.23	44.9833	26.66	24.72	26.11	25.83	17.01	15.73	16.71	16.4833	2.02	12.74	3.11	5.95667		hypothetical protein
gene01421	0	0	0	0	0	0	0	0	0	0	0	0	0	0	0	0		hypothetical protein
gene01422	10.62	14.72	18.34	14.56	14.44	14.84	13.68	14.32	16.6	16.33	14.15	15.6933	4.93	12.34	9.17	8.81333		C4-dicarboxylate transporter/malic acid transport protein
gene01423	530.48	283.7	232.41	348.863	159.74	122.59	162.88	148.403	119.71	120.09	110.24	116.68	109.44	143.86	179.02	144.107	rpsF	hypothetical protein
gene01424	22.98	12.87	9.97	15.2733	8.86	11.03	12.8	10.8967	9.4	13.8	13.77	12.3233	24.92	46.68	142.5	71.3667		HAD-like protein
gene01425	93.2	102.03	101.81	99.0133	115.34	143.84	149.8	136.327	83.63	103.69	110.11	99.1433	6.34	20.81	20.89	16.0133		hypothetical protein
gene01426	24.94	49.84	64.8	46.5267	45.67	34.08	39.81	39.8533	53.86	52.22	56.93	54.3367	5.13	13.22	8.95	9.1		hypothetical protein
gene01427	54.88	60.07	67.02	60.6567	49.21	45.99	50.59	48.5967	51.49	50.62	42.84	48.3167	11.53	31.93	26.33	23.2633		hypothetical protein
gene01428	13.85	6.35	9.31	9.83667	7.51	5.38	7.52	6.80333	8.32	10.41	10.62	9.78333	4.8	8.03	10.74	7.85667		hypothetical protein
gene01429	55.6	63.85	62.42	60.6233	49.78	42.09	49.55	47.14	50.57	46.33	45.5	47.4667	11.41	26.03	19.34	18.9267		IMS-domain-containing protein
gene01430	365.37	391.37	425.38	394.04	153.98	197.7	123.1	158.26	254.75	176.24	195.08	208.69	43.79	186.26	116.13	115.393		RraA-like protein
gene01431	233.59	111.09	94.75	146.477	110.25	144.84	114.38	123.157	114.42	114.3	132.96	120.56	28.26	62.44	74.77	55.1567		RraA-like protein
gene01432	109.59	71.93	74.2	85.24	59.86	58.96	65.69	61.5033	55.57	52.51	51.79	53.29	32	71.18	76.53	59.9033		hypothetical protein
gene01433	22.2	37.68	53.31	37.73	54.01	44.34	54.69	51.0133	57.26	52.94	55.48	55.2267	7.6	19.46	14.67	13.91		hypothetical protein
gene01434	11.24	13.25	13.51	12.6667	13.35	11.39	11.56	12.1	11.46	17.32	8.62	12.4667	5.71	15.59	11.99	11.0967		DHS-like NAD/FAD-binding domain-containing protein
gene01435	20.95	32.01	33.53	28.83	39.94	31.3	39.27	36.8367	40.3	38.74	38.98	39.34	6	10.38	6.7	7.69333		hypothetical protein
gene01436	11.46	26.32	80.75	39.51	61.6	54.76	53.79	56.7167	63.82	55.27	46.01	55.0333	4.31	11.63	10.47	8.80333	ARF-BP1	hypothetical protein
gene01437	27.49	40.29	50.47	39.4167	41.42	36.08	39.3	38.9333	41.79	39.45	35.9	39.0467	5.99	17.73	11.76	11.8267		hypothetical protein
gene01438	206.99	228.08	221.32	218.797	222.71	215.67	238.15	225.51	182.66	191.98	172.05	182.23	55.46	129.81	108.78	98.0167		hypothetical protein
gene01439	22.1	36.63	36.45	31.7267	54.33	46.27	42.38	47.66	49.91	38.86	33.79	40.8533	4.68	9.1	7.42	7.06667		phenylacetyl-CoA ligase
gene01440	45.27	81.49	100.48	75.7467	70.93	60.25	63.71	64.9633	64.55	70.72	72.55	69.2733	135.8	182.49	98.86	139.05		hypothetical protein
gene01441	334.47	813.8	712.53	620.267	902.62	771.91	780.61	818.38	794.32	685.56	724.13	734.67	28.17	60.83	37.75	42.25		hypothetical protein
gene01442	102.37	132.97	142.6	125.98	105.09	89.09	91.22	95.1333	107.11	95.06	80.66	94.2767	18.98	40.54	29.72	29.7467		hypothetical protein
gene01443	18.67	26.52	29.27	24.82	28.44	22.28	18.21	22.9767	32.41	25.57	22.82	26.9333	9.78	24.45	19.13	17.7867	YSH1	Metallo-hydrolase/oxidoreductase
gene01444	13.48	24.46	33.05	23.6633	22.83	19.82	16.13	19.5933	22.82	21.25	16.76	20.2767	2.78	6.79	4.16	4.57667	CTF4	hypothetical protein
gene01445	32.34	89.49	115.84	79.2233	101.72	91.24	91.42	94.7933	102.76	95.64	92.36	96.92	6.5	18.43	13.85	12.9267		hypothetical protein
gene01446	53.45	53.49	58.68	55.2067	45.07	36.92	38.75	40.2467	46.27	45.34	39.15	43.5867	8.61	21.35	18.04	16		hypothetical protein
gene01447	11.59	27.36	45.59	28.18	41.39	37.71	39.34	39.48	41.72	40.34	35.53	39.1967	4.86	11.73	9.54	8.71		hypothetical protein
gene01448	6.08	9.92	9.47	8.49	4.12	4.14	2.14	3.46667	2.64	2.34	1.81	2.26333	0.29	0.24	0.08	0.203333		oxalate decarboxylase
gene01449	20.51	29.61	26.29	25.47	22.75	17.19	19.94	19.96	25.13	22.56	22.56	23.4167	4.86	12.57	7.87	8.43333		hypothetical protein
gene01450	209.59	245.6	240.94	232.043	161.55	130.13	122.69	138.123	64.03	71.23	67.82	67.6933	32.56	79.26	56.49	56.1033		FAD/NAD(P)-binding domain-containing protein
gene01451	154.46	166.59	218.64	179.897	140.65	109.26	114.01	121.307	69.56	73.78	53.94	65.76	17.81	41.9	33.06	30.9233		FAD/NAD(P)-binding domain-containing protein
gene01452	0	0	0	0	0	0	0.02	0.00666667	0	0	0	0	0	0	0	0		hypothetical protein
gene01453	218.77	270.93	353.69	281.13	304.59	180.99	249.81	245.13	115.01	102.66	110.2	109.29	21.08	46.39	28.92	32.13		drug:h+ antiporter
gene01454	21.47	52.45	73.03	48.9833	55.59	45.92	52.67	51.3933	54.04	52.14	48.73	51.6367	7.11	28.75	18.37	18.0767	HRD1	hypothetical protein
gene01455	29.2	49.36	69.64	49.4	70.55	65.38	64.56	66.83	59.37	63.03	58.54	60.3133	6.43	17.23	10.75	11.47	ppnK	ATP-NAD kinase
gene01456	15.59	38.45	44.96	33	23.21	24.44	22.11	23.2533	17.94	18.32	11.85	16.0367	1.75	5.62	4.02	3.79667		hypothetical protein
gene01457	303.96	201.04	182.87	229.29	147.66	224.17	172.08	181.303	115.81	85.11	65.91	88.9433	11.03	18.44	23.37	17.6133		hypothetical protein
gene01458	27.09	79.93	112.12	73.0467	94.57	68.25	90.2	84.34	88.24	68.74	65.17	74.05	9.21	20.83	14.97	15.0033		hypothetical protein
gene01459	2113.44	1941	1832.6	1962.35	1932.86	2228.99	2159.81	2107.22	2196.58	2412.71	2942.2	2517.16	247.78	755.24	495.17	499.397		RNA-binding domain-containing protein
gene01460	15.83	49.28	70.27	45.1267	63.05	69.29	62.9	65.08	56.06	62.28	54.67	57.67	11.1	26.18	19.88	19.0533		hypothetical protein
gene01461	16.57	29.65	46.93	31.05	39.39	37.58	37.21	38.06	40.97	44.9	41.29	42.3867	15.25	35.03	24.45	24.91		hypothetical protein
gene01462	132.89	107.78	96.18	112.283	82.52	98.7	94.93	92.05	97.72	98.82	80.07	92.2033	33.33	79.39	60.35	57.69		hypothetical protein
gene01463	541.63	560.81	485.05	529.163	342.76	325.11	338.35	335.407	413.74	366.1	329.48	369.773	119.2	259.8	239.24	206.08		mitochondrion protein
gene01464	12.3	24.38	28.02	21.5667	23.2	20.79	26.81	23.6	24.39	24.09	29.34	25.94	7.32	17.98	18.58	14.6267		DUF747-domain-containing protein
gene01465	118.85	174	189.67	160.84	135.16	105.38	118.22	119.587	165.44	141.26	145.52	150.74	19.03	44.59	38.75	34.1233		hypothetical protein
gene01466	12.47	24.79	30.55	22.6033	28.84	29.1	55.36	37.7667	21.99	24.49	45.71	30.73	6.78	23.23	20.69	16.9		hypothetical protein
gene01467	17.62	29.68	49.71	32.3367	46.6	41.9	52.03	46.8433	56.23	54.94	59.72	56.9633	17.86	41.22	40.87	33.3167		RhoGAP-domain-containing protein
gene01468	24.38	35.47	50.66	36.8367	36.51	27.93	24.66	29.7	31.52	26.43	29.19	29.0467	5.79	15.63	11.41	10.9433		Noc2-domain-containing protein
gene01469	12.43	17.35	14.05	14.61	14.28	14.43	11.45	13.3867	20.97	17.03	16.01	18.0033	3.14	7.86	6.2	5.73333		member of major facilitator superfamily multidrug-resistance, DHA1 sub-family
gene01470	12.51	22.19	30.59	21.7633	23.54	18.5	19.75	20.5967	26.16	25.13	20.23	23.84	1.92	4.89	5.64	4.15		hypothetical protein
gene01471	20.29	54.26	109.8	61.45	89.13	85.86	93.11	89.3667	114.98	114.14	97.31	108.81	7.06	21.11	11.75	13.3067		hypothetical protein
gene01472	32.06	35.78	39.52	35.7867	29.36	31.63	32.39	31.1267	24.72	20.35	17.51	20.86	2.95	9.13	6.91	6.33		hypothetical protein
gene01473	90.41	86.31	81.75	86.1567	96.65	85.69	79.87	87.4033	82.18	82.84	70.42	78.48	7.43	18.96	16.28	14.2233		HK-domain-containing protein
gene01474	16.28	25.86	27.54	23.2267	27.23	21.45	20.95	23.21	18.65	18.63	17.6	18.2933	1.16	3.36	2.54	2.35333		hypothetical protein
gene01475	50.34	52.49	51.1	51.31	45.03	43.21	46.14	44.7933	44.79	42.55	43.04	43.46	9.66	21.28	18.05	16.33		hypothetical protein
gene01476	58.93	66.01	63.55	62.83	66.04	58.31	61.21	61.8533	97.36	96.38	94	95.9133	39.28	66.12	81.82	62.4067		hypothetical protein
gene01477	5.16	10.24	18.3	11.2333	10.95	6.77	7.1	8.27333	9.2	7.86	7.14	8.06667	0.31	1.63	0.77	0.903333		hypothetical protein
gene01478	18.65	32.64	45.86	32.3833	65.43	60.61	61.95	62.6633	78.95	67.8	56.15	67.6333	21.27	36.24	26.13	27.88		hypothetical protein
gene01479	21.07	27.38	24.34	24.2633	24.07	18.64	31.16	24.6233	28.57	23.08	20.11	23.92	13.12	24.34	26.57	21.3433		GatB/YqeY domain-containing protein
gene01480	2.89	6.9	10.77	6.85333	11.08	11.69	10.61	11.1267	11.6	9.9	6.02	9.17333	1.05	2.98	1.97	2		hypothetical protein
gene01481	35.97	48.28	54.82	46.3567	51.72	57.29	56.68	55.23	58.11	58.32	60.01	58.8133	22.29	48.29	47.01	39.1967		hypothetical protein
gene01482	36.94	52.77	67.6	52.4367	55.18	55.01	54.22	54.8033	55.91	56.41	54.93	55.75	11.32	29.32	22.69	21.11		P-loop containing nucleoside triphosphate hydrolase protein
gene01483	23	46.24	54.29	41.1767	52.35	53	65.12	56.8233	57.13	51.63	56.47	55.0767	9.46	23.01	20.97	17.8133		kinase-like protein
gene01484	28.95	59.35	77.09	55.13	53.62	54.05	54.13	53.9333	64.19	60.19	53.04	59.14	6.88	18.52	11.62	12.34		hypothetical protein
gene01485	65.88	90.3	80.36	78.8467	99.78	116.1	118.68	111.52	103.31	84.93	96.16	94.8	29.3	73.68	53.98	52.32		hypothetical protein
gene01486	32.41	44.92	45	40.7767	38.06	39.01	51.94	43.0033	34.47	34.95	38.26	35.8933	9.5	25.97	20.64	18.7033		hypothetical protein
gene01487	14.16	27.09	33.09	24.78	27.09	27.84	26.72	27.2167	28.65	29.43	24.52	27.5333	5.38	16.39	9.42	10.3967		hypothetical protein
gene01488	643.22	367.11	337.23	449.187	302.75	279.7	272.11	284.853	235.56	250.08	185.19	223.61	87.22	153.63	142.03	127.627	bolA	bola-like protein
gene01489	9.04	10.18	10.9	10.04	8.05	11.13	10.17	9.78333	10.9	11.29	9.78	10.6567	2.6	5.44	5.7	4.58		hypothetical protein
gene01490	52.27	69.91	72.3	64.8267	64.29	49.93	61.88	58.7	59.27	54.77	62.63	58.89	34.21	85.02	56.22	58.4833		hypothetical protein
gene01491	30.02	48.47	57.41	45.3	51.17	55	50.25	52.14	66.36	61.94	64.45	64.25	29.74	62.49	54.35	48.86		hypothetical protein
gene01492	118.51	173.32	152.48	148.103	137.95	111.73	110.02	119.9	143.99	145.26	137.33	142.193	22.87	52.54	35.62	37.01	NAT5	acyl-CoA N-acyltransferase
gene01493	0.24	0.53	1.09	0.62	0	0.55	0	0.183333	0.28	0.22	0	0.166667	0.08	0.14	0.13	0.116667		hypothetical protein
gene01494	6.11	8.76	10.83	8.56667	7.16	6.55	6.11	6.60667	12.1	10.76	8.78	10.5467	1.56	3.66	3.21	2.81		ATP-dependent DNA ligase
gene01495	821.8	494.75	385.62	567.39	284.31	285.41	284.84	284.853	194.86	170.39	182.64	182.63	13.99	39.02	30.09	27.7		hypothetical protein
gene01496	79.49	177.26	217.54	158.097	199.6	179.08	184.6	187.76	161.75	146.43	145.87	151.35	19.85	49.84	35.73	35.14		kinase-like protein
gene01497	64.52	74.47	75.69	71.56	85.53	78.44	82.22	82.0633	109.17	109.84	111.86	110.29	8.79	20.48	13.28	14.1833		alpha/beta-hydrolase
gene01498	73.69	97.49	85.48	85.5533	97.79	104.32	114.01	105.373	93.63	73.61	80.82	82.6867	20.78	48.75	36.56	35.3633		hypothetical protein
gene01499	17.21	21.79	32.92	23.9733	21.33	22.05	17	20.1267	19.84	21.64	13.3	18.26	3.72	11.64	8.99	8.11667		hypothetical protein
gene01500	19.93	64.43	66.06	50.14	80.25	69.17	89.26	79.56	71.66	51.87	57.33	60.2867	6.63	9.65	6.83	7.70333		Osmotin, thaumatin-like protein
gene01501	78.46	59.88	48.74	62.36	35.48	25.13	36.02	32.21	32.21	29.67	22.43	28.1033	8.41	27.91	20.76	19.0267		hypothetical protein
gene01502	24.26	37.64	37.58	33.16	39.91	45.67	40.19	41.9233	49.67	44.33	43.01	45.67	14.12	48.07	25.41	29.2		endoplasmic oxidoreductin
gene01503	1.38	1.32	1.8	1.5	2.64	2.2	1.82	2.22	2.17	1.91	2.55	2.21	0.03	0	0	0.01		Aldo/keto reductase
gene01504	64.5	79.81	96.97	80.4267	102.32	84.71	80.06	89.03	83.87	84.62	64.97	77.82	2.22	5.84	4.1	4.05333	sat	sulfate adenylyltransferase
gene01505	1.79	3.59	4.82	3.4	8.84	6.05	6.45	7.11333	8.81	3.96	2.07	4.94667	0.32	2.91	1.01	1.41333		cytochrome P450
gene01506	3.97	6.63	11.37	7.32333	27.05	19.63	16.71	21.13	9.97	10.58	4.98	8.51	2.28	6.42	2.34	3.68		cytochrome P450
gene01507	6.16	10.37	12.25	9.59333	7.08	9.22	4.65	6.98333	8.58	7.41	5.96	7.31667	1.43	2.81	2.09	2.11		hypothetical protein
gene01508	154.39	265.2	269.35	229.647	290.43	237.56	243.54	257.177	282.68	242.78	223.93	249.797	40.46	62.34	48.3	50.3667	prpD	2-methylcitrate dehydratase
gene01509	26.23	53.89	71.33	50.4833	73.99	60.29	69.01	67.7633	97.6	94.03	84.32	91.9833	13.96	36.7	22.16	24.2733		hypothetical protein
gene01510	28.8	49.93	59.63	46.12	50.08	47.16	43.97	47.07	47.85	44.52	44.25	45.54	7.13	20.54	19.74	15.8033	GYP1	RabGAP/TBC
gene01511	34.83	73.93	83.5	64.0867	63.55	46.69	51.29	53.8433	60.45	58.16	54.96	57.8567	17.88	42.75	32.76	31.13		hypothetical protein
gene01512	34.24	21.1	20.67	25.3367	20.09	21.19	23.7	21.66	21.69	31.71	27.22	26.8733	3	6.31	6.18	5.16333		hypothetical protein
gene01513	70.46	128.95	134.5	111.303	110.63	124.04	99.8	111.49	170.1	172.72	179.94	174.253	4.6	8.1	7.89	6.86333		hypothetical protein
gene01514	0	0	0	0	0	0	0	0	0	0	0	0	0	0	0	0		tRNA-Met
gene01515	7.1	22.21	27.66	18.99	25.61	31.8	28.89	28.7667	27.48	25.73	22.35	25.1867	5.91	14.47	11.13	10.5033		hypothetical protein
gene01516	23.84	48.05	74.57	48.82	71	73.22	70.45	71.5567	78.79	74.57	67.04	73.4667	9.87	25.35	16.45	17.2233		Pkinase-domain-containing protein
gene01517	15.75	23.36	24.42	21.1767	32.95	33.43	30.31	32.23	17.1	15.47	22.52	18.3633	4.9	14.76	10.34	10		cyclin-domain-containing protein
gene01518	2238.53	2323.24	2210.1	2257.29	1798.85	1121.38	1493.18	1471.14	1612.48	1377.44	1340.75	1443.56	874.25	2012.6	1812.57	1566.47	RPL12	60S ribosomal protein L12
gene01519	12.11	15.74	23.29	17.0467	16.38	15.17	17.38	16.31	21.96	20.35	15.39	19.2333	7.49	18.96	15.13	13.86		hypothetical protein
gene01520	1.05	0	0	0.35	1.14	0	0.83	0.656667	0.93	1.25	0.57	0.916667	0.6	2.49	1.18	1.42333		hypothetical protein
gene01521	68.55	78.81	90.91	79.4233	71.79	82.04	65.97	73.2667	77.16	61.84	41.64	60.2133	16.39	43.46	26.41	28.7533		kinase-like protein
gene01522	138.39	122	119.8	126.73	95.79	68.57	76.09	80.15	81.8	71.32	62.69	71.9367	38.94	97.54	80.33	72.27	ilvH	acetolactate synthase
gene01523	33.68	91.96	100.7	75.4467	106.18	77.51	72.67	85.4533	80.37	54.65	38.69	57.9033	23.27	32.4	31.31	28.9933		hypothetical protein
gene01524	213.99	186.89	183.52	194.8	172.01	138.76	156.97	155.913	166.07	137.62	131.87	145.187	63.92	133.37	104.31	100.533		glycoside hydrolase family 76 protein
gene01525	27.97	72.43	43.67	48.0233	144.3	160.61	132.33	145.747	246.75	234.68	253.71	245.047	24.04	63.37	31.95	39.7867		hypothetical protein
gene01526	39.46	56.9	68.86	55.0733	61.9	56.94	61	59.9467	75.58	68.16	64.42	69.3867	26.09	54.31	38.3	39.5667	PRP16	pre-mRNA splicing factor
gene01527	14.07	27.67	40.61	27.45	30.16	24.08	24.92	26.3867	28.86	28.2	23	26.6867	3.64	10.72	8.08	7.48	RSE1	hypothetical protein
gene01528	231.2	142.94	135.78	169.973	108.02	100.01	100.07	102.7	121.07	97.65	93.44	104.053	39.35	76.22	76.78	64.1167		DUF1168-domain-containing protein
gene01529	6.32	9.33	12	9.21667	11.3	9.51	8.04	9.61667	9.81	10.72	10.49	10.34	1.55	3.65	3.09	2.76333		WD40 repeat-like protein
gene01530	40.19	34.11	40.47	38.2567	29.09	27.74	24.72	27.1833	31.58	28.42	25.19	28.3967	23.21	45.45	34.18	34.28	ATG6	autophagy protein 6
gene01531	11.33	14.25	21.32	15.6333	18.32	15.69	13.44	15.8167	16.17	15.06	12.54	14.59	3.33	9.04	6.9	6.42333		hypothetical protein
gene01532	32.16	41.17	53.4	42.2433	43.85	42.86	38.86	41.8567	45.84	49.19	46.31	47.1133	11.88	29.33	25.59	22.2667		hypothetical protein
gene01533	8.2	14.89	20.88	14.6567	23.01	21.24	14.44	19.5633	18.07	18.91	15.21	17.3967	1.53	3.79	2.68	2.66667		hypothetical protein
gene01534	40.97	65.85	99.01	68.61	73.03	75.25	82.61	76.9633	71.38	69.93	69.81	70.3733	8.34	35.06	26.31	23.2367		hypothetical protein
gene01535	38.7	74.02	112.78	75.1667	88.76	73.04	90.36	84.0533	91.49	82.74	77.71	83.98	8.66	22.8	13.95	15.1367		hypothetical protein
gene01536	78.26	92.48	93.94	88.2267	51.83	52.7	68.28	57.6033	39.84	40.27	51.6	43.9033	6.6	13.89	7.1	9.19667		DUF1771-domain-containing protein
gene01537	340.6	399.4	327.16	355.72	307.78	363.21	337.58	336.19	269.14	212.62	238.06	239.94	39.3	104.3	82.83	75.4767	HR23	UV excision repair protein Rad23
gene01538	327.93	512.86	489.04	443.277	500.98	456.3	466.78	474.687	311.58	236.34	283.8	277.24	49.24	105.26	89.94	81.48	HR23	UV excision repair protein Rad23
gene01539	34.55	52.55	56.77	47.9567	45.51	45.47	49.02	46.6667	39.55	41.71	36.27	39.1767	13	31.93	26.85	23.9267		hypothetical protein
gene01540	696.93	686.5	147.56	510.33	5.5	49.85	141.52	65.6233	81.36	105.39	118.85	101.867	104.44	107.11	64.03	91.86		hypothetical protein
gene01541	11.55	29.03	33.8	24.7933	27.17	18.91	25.2	23.76	17.73	16.96	14.56	16.4167	1.15	3.4	1.6	2.05		hypothetical protein
gene01542	95.72	110.44	107.07	104.41	101.3	71.09	117.57	96.6533	63.56	54.32	76.8	64.8933	24.17	41.88	44.71	36.92		cytochrome C oxidase copper chaperone
gene01543	15.8	10.22	8.04	11.3533	1.63	1.41	0.94	1.32667	0.7	0.57	0	0.423333	0.88	0.88	0.17	0.643333		glycoside hydrolase
gene01544	46.61	102.81	142.73	97.3833	100.72	95.84	89.12	95.2267	133.44	126.84	102.15	120.81	20.51	58.51	38.89	39.3033		hypothetical protein
gene01545	775.43	1219.93	1032.38	1009.25	884.49	769.42	772.68	808.863	601.09	683.88	654.96	646.643	204.68	462.38	440.14	369.067		hypothetical protein
gene01546	36.05	27.83	27.75	30.5433	26.35	25.32	24.21	25.2933	23.44	25.61	23.72	24.2567	9.76	18.03	16.81	14.8667		PIN domain-like protein
gene01547	41.99	53.89	66.81	54.23	51.65	44.23	43.65	46.51	54.71	48.47	43.47	48.8833	6.83	17.97	13.54	12.78	RRP44	RNB-domain-containing protein
gene01548	23.36	27.54	33.64	28.18	50.32	53.7	49.81	51.2767	49.7	55.55	56.68	53.9767	3.37	7	4.99	5.12		nitrite reductase
gene01549	50.29	57.59	68.42	58.7667	42.33	36.13	33.29	37.25	43.77	40.55	34.9	39.74	7.91	23.2	17.3	16.1367		hypothetical protein
gene01550	383.4	253.22	247.16	294.593	174.43	166.47	206.42	182.44	181.39	197.75	172.21	183.783	151.33	276.49	245.27	224.363		mitochondrial import inner membrane translocase subunit
gene01551	2.1	1.88	2.82	2.26667	2.78	3.06	1.9	2.58	3.83	4.74	4.45	4.34	0.53	0.86	0.86	0.75		nitrate reductase
gene01552	54.62	74.8	67.65	65.69	67.65	66.42	70.68	68.25	76.42	67.91	78.83	74.3867	21.88	47.81	45.56	38.4167		hypothetical protein
gene01553	10.83	14.56	16.39	13.9267	16.64	17.76	13.78	16.06	18.18	14.51	20.79	17.8267	12.21	12.41	12.65	12.4233		hypothetical protein
gene01554	14.62	10.65	4.14	9.80333	0.96	2.07	0.92	1.31667	4.16	2.94	0.48	2.52667	3.63	2.76	2.85	3.08		hypothetical protein
gene01555	128.49	165.34	132.91	142.247	282.9	303.8	309.74	298.813	309.47	286.42	290.68	295.523	21.19	48.85	35.88	35.3067		NAD(P)-binding protein
gene01556	102.7	93.7	104.6	100.333	86.68	79.65	83.84	83.39	80.74	74.17	70.22	75.0433	35.87	107.27	73.73	72.29		DUF914-domain-containing protein
gene01557	1.95	5.23	11.28	6.15333	8.47	3.78	5.77	6.00667	9.84	9.02	6.18	8.34667	2.48	6.17	5.06	4.57		hypothetical protein
gene01558	3.14	2.03	2.72	2.63	1.73	1.44	1.79	1.65333	2.93	3.04	3.68	3.21667	0.57	1.6	1.43	1.2		hypothetical protein
gene01559	60.14	66.22	83.61	69.99	47.75	46.95	42.9	45.8667	47.64	48.25	40.66	45.5167	5.25	15.54	13.1	11.2967		hypothetical protein
gene01560	73.14	151.21	221.17	148.507	164.65	152.83	177.48	164.987	152.45	148.14	154.98	151.857	31.98	68.19	56.46	52.21		polysaccharide synthase Cps1p
gene01561	18.78	20.67	17.48	18.9767	28.73	30.76	24.17	27.8867	34.79	39.32	41.68	38.5967	3.91	6.43	6.4	5.58		nucleotide-binding domain-containing protein
gene01562	1519.85	780.73	625.01	975.197	437.49	444.47	458.54	446.833	256.57	225.64	265.76	249.323	634.62	1056.48	1421.56	1037.55		hypothetical protein
gene01563	47.89	93.88	125.63	89.1333	155.11	161.48	164.5	160.363	144.39	145.22	147.01	145.54	26.02	80.23	62.73	56.3267		glycoside hydrolase
gene01564	41.97	31.99	30.7	34.8867	26.11	24.83	25.01	25.3167	21.75	24.83	18.97	21.85	10.3	24.3	15.4	16.6667		hypothetical protein
gene01565	146.81	230.41	280.65	219.29	106.06	101.48	98.03	101.857	85.53	74.24	68.76	76.1767	13.43	30.93	21.6	21.9867		hypothetical protein
gene01566	145.11	150.73	135.99	143.943	172.02	170.33	163.56	168.637	118.32	98.28	118.34	111.647	12.73	23.51	19.28	18.5067		HAD-like protein
gene01567	7.76	7.2	11.89	8.95	4.21	5.77	6.54	5.50667	4.31	4.77	3.89	4.32333	0.21	0.65	0.12	0.326667		hypothetical protein
gene01568	10.64	11.13	9.21	10.3267	5.49	7.42	3.3	5.40333	4.45	4.2	6.49	5.04667	0.2	2.21	1.05	1.15333		hypothetical protein
gene01569	96.34	83.61	99.25	93.0667	70.01	65.45	83	72.82	48.06	43.73	40.95	44.2467	5	12.63	10.05	9.22667		hypothetical protein
gene01570	102.35	90.18	106.78	99.77	49.03	53.99	68.81	57.2767	32.83	30.54	24.18	29.1833	5.83	14.94	7.67	9.48		hypothetical protein
gene01571	17.06	13.84	13.03	14.6433	16.32	19.17	16.24	17.2433	22.18	28.4	25.3	25.2933	6.69	13.54	13.09	11.1067		hypothetical protein
gene01572	9.76	32.04	50.41	30.7367	36.88	29.84	33.1	33.2733	37.65	37.51	26.78	33.98	9.78	25.84	9.67	15.0967		hypothetical protein
gene01573	10.55	18.34	37.04	21.9767	28.68	25.88	26.4	26.9867	34.06	29.58	25.3	29.6467	3.6	10.28	6.38	6.75333	TOR	atypical/PIKK/FRAP protein kinase
gene01574	6.43	6.6	7.59	6.87333	5.09	3.96	3.47	4.17333	5.95	6.83	4.25	5.67667	1.62	3.99	2.9	2.83667		hypothetical protein
gene01575	22.82	48.64	48.5	39.9867	12.88	9.19	6.69	9.58667	4.87	5.58	6.3	5.58333	3.28	4.86	2.39	3.51		hypothetical protein
gene01576	68.11	53.89	38.28	53.4267	32.72	29.38	32.13	31.41	32.54	28.91	30.74	30.73	7.51	13.93	13.37	11.6033		hypothetical protein
gene01577	258.59	261.99	249.21	256.597	191.42	115.93	181.02	162.79	160.35	141.73	141.53	147.87	76.91	126.19	106.02	103.04	argF	ornithine carbamoyltransferase 1
gene01578	0.22	0.32	0.33	0.29	0.62	0.59	0	0.403333	0.5	0.41	0.15	0.353333	0	0.22	0.17	0.13		hypothetical protein
gene01579	289.9	157.24	154.84	200.66	117	91.44	119	109.147	124.38	94.27	111.87	110.173	65.26	91.62	89.78	82.22		hypothetical protein
gene01580	24.06	40.04	54.16	39.42	53.95	48.51	42.39	48.2833	59.01	69.54	65	64.5167	15.23	14.27	14.02	14.5067	aceB	malate synthase
gene01581	0	0	0	0	0	0	0	0	0	0	0	0	0	0	0	0		hypothetical protein
gene01582	36.03	46.5	59.93	47.4867	40.58	36.67	38.57	38.6067	38.07	39.19	34.9	37.3867	11.28	27.38	22.03	20.23	DEF	DUF1253-domain-containing protein
gene01583	47.97	63.86	90.33	67.3867	95.38	86.68	100.66	94.24	106.36	95.34	92.55	98.0833	19.73	39.45	29.71	29.63		HlyIII-domain-containing protein
gene01584	114.28	60.03	60.63	78.3133	47.33	43.18	44.21	44.9067	34.09	34.98	28.19	32.42	18.59	43.5	47.13	36.4067	pth	peptidyl-tRNA hydrolase
gene01585	52.53	92.66	113.46	86.2167	107.31	123.36	94.71	108.46	86.59	80.38	78.7	81.89	2.9	6.54	5.44	4.96		glycosyl hydrolase
gene01586	16.91	33.73	44.14	31.5933	28.82	27.94	33.28	30.0133	30.97	29.3	25.68	28.65	4.32	10.9	5.95	7.05667		DUF580-domain-containing protein
gene01587	15.49	37.33	46.17	32.9967	31.27	27.18	27.6	28.6833	32.94	29.53	27.61	30.0267	15.38	34.46	22.02	23.9533	PAS2	PTPLA-domain-containing protein
gene01588	342.05	230.85	200.76	257.887	179.73	154.05	173.41	169.063	156.03	131.15	155.54	147.573	55.81	106.9	96.99	86.5667	fixB	electron transfer flavo protein alpha-subunit
gene01589	4.34	11.21	13.99	9.84667	25.37	17.52	22.21	21.7	23.67	17.57	14.1	18.4467	2.15	6.55	4.22	4.30667		P-loop containing nucleoside triphosphate hydrolase protein
gene01590	29.02	50.66	80.38	53.3533	65.33	69.01	58.3	64.2133	75.71	72.61	64.21	70.8433	9.6	33.46	21.36	21.4733		ras GEF
gene01591	18.27	28.33	26.58	24.3933	38.06	35.34	38.9	37.4333	49.07	48.85	44.27	47.3967	4.88	13.28	6.38	8.18		hypothetical protein
gene01592	11.2	20.37	38.5	23.3567	22.15	16.26	15.82	18.0767	22.42	19.42	17.4	19.7467	3.7	12.34	7.31	7.78333	POLR1A	beta and beta-prime subunits of DNA dependent RNA-polymerase
gene01593	46.59	51.06	60.82	52.8233	54	43.74	57.57	51.77	53.06	48.99	45.35	49.1333	14.09	26.47	29.7	23.42	PXR1	TPR-like protein
gene01594	1.62	2.5	3.68	2.6	3.51	3.41	2.78	3.23333	4.23	4.02	4.16	4.13667	3.01	4.69	3.43	3.71		hypothetical protein
gene01595	1.3	0.95	2.3	1.51667	0.46	0	0.15	0.203333	2.16	1.62	1.38	1.72	0.33	0.6	0.9	0.61		hypothetical protein
gene01596	18.68	39.75	42.03	33.4867	29.18	36.09	31.74	32.3367	34.62	31.43	40.96	35.67	7.1	18.24	12.13	12.49		hypothetical protein
gene01597	4.94	11.92	12.55	9.80333	6.1	4.29	7.1	5.83	7.87	8.1	8.15	8.04	1.55	4.9	4.65	3.7		hypothetical protein
gene01598	11.27	15.69	15.25	14.07	9.66	9.32	9.2	9.39333	11.08	9.62	9.18	9.96	2.44	6.9	4.16	4.5		hypothetical protein
gene01599	147.31	141.6	124.59	137.833	121.69	81.1	90.48	97.7567	119.98	95.54	96.61	104.043	62.36	116.42	131.59	103.457	asd	aspartate-semialdehyde dehydrogenase
gene01600	1.27	2.21	3.05	2.17667	2.69	1.66	1.66	2.00333	3.05	2.72	1.95	2.57333	2.95	7.34	3.83	4.70667		hypothetical protein
gene01601	12.86	28.31	47.7	29.6233	27.92	20.9	20.53	23.1167	28.68	27.26	24.29	26.7433	4.26	12.05	8.3	8.20333		NUC173-domain-containing protein
gene01602	13.89	15.64	16.56	15.3633	14.84	14.45	13.57	14.2867	17.57	14.24	10.32	14.0433	4.97	13.98	10.22	9.72333		hypothetical protein
gene01603	13.33	19.05	22.05	18.1433	21.49	22.68	20.44	21.5367	24.48	22.31	22.34	23.0433	2.79	8.28	6.99	6.02		phospholipase D/nuclease
gene01604	8.85	11.79	14.04	11.56	8.27	5.53	5.44	6.41333	9.31	7.43	6.38	7.70667	0.76	1.49	1.34	1.19667		hypothetical protein
gene01605	210.51	134.2	124.97	156.56	106.4	108.31	89.28	101.33	72.42	71.85	67.05	70.44	27.4	70.73	62.48	53.5367		hypothetical protein
gene01606	50.72	77.14	84.01	70.6233	67.03	49.52	60.19	58.9133	59.78	47.5	47.65	51.6433	15.49	28.9	22.55	22.3133		RCC1/BLIP-II
gene01607	35.17	41.82	54.17	43.72	46.42	51.94	43.71	47.3567	69.76	74.21	60.12	68.03	11.16	32.72	22.73	22.2033		acetyl-CoA synthetase-like protein
gene01608	6.86	4.21	5.98	5.68333	4.08	3.9	2.77	3.58333	5.64	4.4	3.31	4.45	4.55	6.04	6.24	5.61		hypothetical protein
gene01609	0.73	2.75	4.63	2.70333	30.74	6.38	11.17	16.0967	13.84	10.42	15.24	13.1667	0	0	0	0	ilvD	dihydroxy-acid dehydratase
gene01610	38.63	45.53	42.85	42.3367	156.25	182.41	155.34	164.667	143.97	147.53	158.96	150.153	3.29	10.01	9.23	7.51	ilvD	dihydroxy-acid dehydratase
gene01611	50.59	48.03	44.63	47.75	51.64	49.65	42.28	47.8567	47.96	49.45	49.18	48.8633	5.54	14.6	14.74	11.6267		FAD/NAD(P)-binding domain-containing protein
gene01612	42.26	62.04	57.1	53.8	53.42	59.58	55.42	56.14	39.59	40.77	36.85	39.07	8.14	20.53	17.13	15.2667		hypothetical protein
gene01613	4.21	4.24	5.66	4.70333	5.19	4.88	6.26	5.44333	8.8	8.44	6.74	7.99333	5.31	12.36	9.33	9		hypothetical protein
gene01614	310.31	295.5	282.48	296.097	351.42	455.18	371.12	392.573	456.15	393.81	540.81	463.59	159.64	324.43	264.22	249.43		hypothetical protein
gene01615	48.26	92.42	110.44	83.7067	93.13	76.24	83.3	84.2233	116.97	91.19	73.86	94.0067	10.79	39.25	20.49	23.51		hypothetical protein
gene01616	44.43	85.36	93.97	74.5867	78	70.83	69.85	72.8933	65.8	57.81	55.51	59.7067	7.39	20.95	13.26	13.8667		hypothetical protein
gene01617	1.29	3.56	4.74	3.19667	3.57	2.14	1.97	2.56	4.72	5.43	2.5	4.21667	2.51	5.64	3.52	3.89		hypothetical protein
gene01618	18.79	14.28	13.74	15.6033	12.54	13.42	9.8	11.92	16.66	15.36	13.72	15.2467	3.75	9.39	6.34	6.49333		glycoside hydrolase family 28 protein
gene01619	13.92	34.7	50.07	32.8967	45.7	43.07	41.73	43.5	61.8	55.03	50.42	55.75	5.43	17.96	12.94	12.11		hypothetical protein
gene01620	22.22	29.2	27.05	26.1567	28.73	28.55	21.67	26.3167	37.13	37.14	35.09	36.4533	11.4	19.41	22.3	17.7033		FAD/NAD(P)-binding domain-containing protein
gene01621	12.2	21.08	25.62	19.6333	20.04	16.94	16.78	17.92	22.22	20.44	18.68	20.4467	9.22	15.83	13.96	13.0033		Dor1-domain-containing protein
gene01622	0.16	0.18	0	0.113333	0	0.19	0	0.0633333	0.19	0.62	0	0.27	0	0.1	0.19	0.0966667		Bromodomain-domain-containing protein
gene01623	179.97	152.51	139.01	157.163	200.87	219.48	217.28	212.543	265.82	255.25	250.48	257.183	11.19	27.29	18.77	19.0833		putative voltage-gated K channel beta subunit
gene01624	3.71	6.6	5.12	5.14333	8.03	7.1	6.41	7.18	13.37	11.57	11.15	12.03	3.31	7.41	4.66	5.12667		hypothetical protein
gene01625	0.42	0	0	0.14	0	0	0	0	0.5	0	0.46	0.32	1.08	0	0.23	0.436667		hypothetical protein
gene01626	2.17	3.61	5.99	3.92333	5.65	3.39	3.57	4.20333	6.85	6.86	4.53	6.08	3.32	6.58	4.25	4.71667		hypothetical protein
gene01627	119.94	179.03	156.28	151.75	178.02	158.37	166.58	167.657	218.33	229.87	213.1	220.433	26.92	38.75	30.44	32.0367	puuE	acetylornithine aminotransferase
gene01628	61.7	84.35	81.96	76.0033	69.28	75.31	81.66	75.4167	76.32	71.04	73.99	73.7833	62.03	106.45	84.34	84.2733		hypothetical protein
gene01629	61.89	71.04	68.96	67.2967	67.81	61.63	64.16	64.5333	66.05	56.71	63.33	62.03	104.5	155.51	148.55	136.187		hypothetical protein
gene01630	40.33	44.32	52.28	45.6433	42.64	49.58	47.04	46.42	46.59	44.87	48.24	46.5667	14.47	33.15	29.79	25.8033	GCN5	hypothetical protein
gene01631	47.81	68.06	97.15	71.0067	66.86	74.44	74.47	71.9233	76.45	68.56	56.79	67.2667	20.89	55.39	39.64	38.64		transcription regulator
gene01632	11.19	23.5	21.28	18.6567	18.98	13.17	15.11	15.7533	21.24	18.69	16.92	18.95	2.09	5.31	3.63	3.67667		predicted protein
gene01633	191	144.9	119.42	151.773	92.94	83.61	100.02	92.19	87.12	72.9	82.74	80.92	8.67	20.37	15.34	14.7933		hypothetical protein
gene01634	5.22	6.67	11.75	7.88	8.82	6.34	4.95	6.70333	13.23	15.24	10.95	13.14	5	10.59	8.77	8.12		hypothetical protein
gene01635	0.89	1.18	2.5	1.52333	1.37	0.91	0.63	0.97	3.23	4.38	3.36	3.65667	1.8	3.27	2.46	2.51		hypothetical protein
gene01636	58.69	78.07	87.47	74.7433	75.4	63.41	78.01	72.2733	72.68	66.19	61.95	66.94	21.71	52.32	39.17	37.7333		protein phosphatase 5
gene01637	26.55	47.83	60.21	44.8633	48.63	38.52	43.78	43.6433	43.22	43.3	44.41	43.6433	7.5	19.43	18.69	15.2067		ATP binding protein
gene01638	81.23	147.35	139.93	122.837	153.52	120.82	161.94	145.427	129.18	94.85	103.18	109.07	30.31	95.66	36.78	54.25		lysozyme-like protein
gene01639	7.95	8.55	7.13	7.87667	5.34	3.65	6.3	5.09667	7.79	6.57	5.71	6.69	11.46	12.38	9.89	11.2433		hypothetical protein
gene01640	86.8	195.4	234.06	172.087	129.65	122.41	124.05	125.37	115.59	126.54	128.08	123.403	11.27	30.74	21.93	21.3133		putative sugar transporter stl1
gene01641	60.12	61.16	61.52	60.9333	47.55	45	49.03	47.1933	53.45	56.89	58.57	56.3033	40.28	82.04	82.67	68.33		hypothetical protein
gene01642	133.64	418.08	530.92	360.88	522.39	538.6	549.36	536.783	721.32	779.46	689.58	730.12	76.45	195.44	160.95	144.28	pas1	hypothetical protein
gene01643	87.15	85.31	67.16	79.8733	92.25	95.81	103.78	97.28	94.95	87.48	97.87	93.4333	8.92	19.32	12.31	13.5167		hypothetical protein
gene01644	8.58	30.28	36.69	25.1833	51.8	30.6	30.42	37.6067	74.73	50.17	35.69	53.53	1.61	0.9	1.64	1.38333		hypothetical protein
gene01645	30.89	66.26	78.66	58.6033	67.81	56.31	68.2	64.1067	65.6	63.26	69.42	66.0933	3.06	8.34	5.35	5.58333		hypothetical protein
gene01646	96.83	107.88	113.25	105.987	88.6	90.78	93.02	90.8	96.72	97.2	87.18	93.7	31.37	87.47	70.16	63		pre-mRNA-splicing factor SLU7
gene01647	12.28	9.69	12.78	11.5833	8.5	4	4.74	5.74667	5.07	5.34	2.85	4.42	1.22	2.93	1.88	2.01		hypothetical protein
gene01648	6.17	6.35	11.3	7.94	8.25	6.4	5.13	6.59333	8.07	8.07	7.2	7.78	1.71	4.87	3.85	3.47667		hypothetical protein
gene01649	3.06	0	0	1.02	0	0	0	0	2.05	1.66	0	1.23667	0.48	1.69	6.42	2.86333		hypothetical protein
gene01650	128.54	149.47	162.9	146.97	152.32	150.69	156.08	153.03	119.48	102.54	90.88	104.3	23.23	60.9	49.99	44.7067	speD	S-adenosylmethionine decarboxylase
gene01651	9.21	18.32	16.61	14.7133	14.31	11.33	15.13	13.59	11.8	8.35	10.75	10.3	0.95	2.24	1.21	1.46667		hypothetical protein
gene01652	8.41	9.28	8.44	8.71	8.14	7.77	8.25	8.05333	11.45	10.88	11.48	11.27	4.33	8.38	7.42	6.71		hypothetical protein
gene01653	12.59	23.3	19.3	18.3967	19.63	15.07	19.56	18.0867	23.2	21.25	16.75	20.4	5.08	19.17	11.44	11.8967	TFB4	transcription factor Tfb4
gene01654	1.81	2.26	1.62	1.89667	1.81	2.24	1.05	1.7	1.72	1.47	1.5	1.56333	0.38	0.43	0.87	0.56		TPR-like protein
gene01655	1.58	2.96	3.3	2.61333	3.77	3.11	1.45	2.77667	4.5	3.7	2.69	3.63	0.9	1.76	1.6	1.42		hypothetical protein
gene01656	56.81	110.01	174.64	113.82	114.97	129.65	123	122.54	109.05	102.19	86.75	99.33	7.75	22.35	15.14	15.08		hypothetical protein
gene01657	46.01	45.42	36.52	42.65	60.66	82.86	73.42	72.3133	84.86	92.36	101.69	92.97	9.16	44.98	25.67	26.6033		hypothetical protein
gene01658	271.37	161.7	147.33	193.467	120.08	110.33	110.25	113.553	132.04	102.93	119.14	118.037	60.69	97.82	87.49	82		hypothetical protein
gene01659	558.87	333.35	417.53	436.583	336.52	439.38	399.89	391.93	253.41	221.8	197.76	224.323	37.21	74.05	45.46	52.24	ZIP1_2_3	Zinc/iron permease
gene01660	7.26	6.79	6.7	6.91667	4.38	4.88	2.46	3.90667	5.93	4.78	2.93	4.54667	0.37	1.2	1	0.856667		Di-copper centre-containing protein
gene01661	0.07	0.16	0.82	0.35	0.54	0.17	0.68	0.463333	1.08	0.81	0.98	0.956667	0.51	1.8	0.67	0.993333		hypothetical protein
gene01662	0.85	1.54	1.55	1.31333	1.49	1.06	0.74	1.09667	2.49	1.97	1.56	2.00667	0.73	2.23	1.18	1.38		hypothetical protein
gene01663	607.93	872.18	933.85	804.653	600.33	566.13	642.59	603.017	565.64	539.92	565.83	557.13	47.14	146.32	116.8	103.42		14-3-3 1 protein
gene01664	27.53	44.09	43.59	38.4033	47.8	40.99	41.76	43.5167	50.45	48.45	44.71	47.87	13.5	31.39	26.67	23.8533		cytochrome P450
gene01665	238.92	241.53	239.38	239.943	141.81	116.22	129.91	129.313	146.24	135.35	131.66	137.75	21.88	61.04	44.61	42.51	cysK	pyridoxal phosphate-dependent enzyme, beta subunit
gene01666	196.66	278.67	290.78	255.37	16.98	14.26	6.29	12.51	10.38	5.45	4.23	6.68667	0.7	1.48	1.05	1.07667		tyrosinase central domain protein
gene01667	0.68	1.68	0.99	1.11667	1.03	0.78	1.24	1.01667	1.7	1.96	1.68	1.78	1.21	2.95	1.1	1.75333		hypothetical protein
gene01668	51	29.09	32.35	37.48	26.99	26.22	22.22	25.1433	30.64	28.52	29.31	29.49	13.98	27.94	25.33	22.4167		kinase-like protein
gene01669	14.37	7.14	4.43	8.64667	3.73	3.84	3.93	3.83333	6.09	4.23	4.84	5.05333	0.26	0.44	0.46	0.386667		N-terminal nucleophile aminohydrolase
gene01670	138.83	153.23	151.15	147.737	131.98	130.91	139.27	134.053	119.22	115.55	118.58	117.783	19.65	41.62	32.09	31.12	mtnA	Methylthioribose-1-phosphate isomerase
gene01671	71.44	67.24	76.95	71.8767	60.38	56.89	64.68	60.65	58.14	57.76	55.98	57.2933	17.13	37.28	33.17	29.1933	hemB	tetrapyrrole biosynthesis, porphobilinogen synthase
gene01672	0.58	0.32	0	0.3	0.61	0.5	0	0.37	0.49	0.4	0.46	0.45	0.05	0	0	0.0166667		hypothetical protein
gene01673	41.12	49.63	37.02	42.59	24.58	25.21	30.98	26.9233	13.97	14.23	15.22	14.4733	2.81	4.37	3.96	3.71333		hypothetical protein
gene01674	790.83	866.8	558.08	738.57	900.13	1088.01	875.25	954.463	626.08	657.04	807.85	696.99	19.19	27.1	29.42	25.2367		hypothetical protein
gene01675	0	0	0	0	0	0	0	0	0	0	0	0	0	0	0.06	0.02		Di-copper centre-containing protein
gene01676	208.25	183.95	135.63	175.943	113.26	102.72	116.6	110.86	120.83	127.13	121.98	123.313	10.88	20.11	27.86	19.6167		kinase-like protein
gene01677	0.38	0.36	0	0.246667	0	0	0	0	0	0.75	0	0.25	0.17	0.27	0.43	0.29		kinase-like protein
gene01678	65.99	41.6	43.63	50.4067	34.04	32.5	38.11	34.8833	42.18	42.73	33.13	39.3467	13.17	30.68	28.96	24.27		kinase-like protein
gene01679	502.07	512.48	383.25	465.933	45.36	22.43	17.63	28.4733	42.05	14.18	11.5	22.5767	0.53	0.76	0.36	0.55		hypothetical protein
gene01680	16.95	24.08	36.87	25.9667	25.36	33.3	38	32.22	20.48	22.61	18.37	20.4867	3.22	10.99	7.18	7.13		UDP-Glycosyltransferase/glycogen phosphorylase
gene01681	24.5	31.41	35.41	30.44	24.04	24.84	21.01	23.2967	18.36	15.93	12.52	15.6033	1.11	3.68	2.37	2.38667		UDP-Glycosyltransferase/glycogen phosphorylase
gene01682	171.91	203.45	248.66	208.007	101.67	93.83	79.08	91.5267	96.98	78.67	63.54	79.73	45.15	99.51	70.6	71.7533		EXS-domain-containing protein
gene01683	25.18	22.51	23.67	23.7867	14.66	11.41	15.06	13.71	14.72	13.73	14.75	14.4	8.02	19.05	17.29	14.7867		hypothetical protein
gene01684	9.28	18.5	17.39	15.0567	11.82	9.29	9.46	10.19	10.74	12.74	9.88	11.12	1.71	3.02	2.79	2.50667		kinase-like protein
gene01685	0.54	0.15	0.2	0.296667	0.26	0.45	0.15	0.286667	0.93	1.22	0.41	0.853333	0.22	0.39	0.43	0.346667		AAA-domain-containing protein
gene01686	1.06	2.82	3.64	2.50667	2.51	2.54	1.83	2.29333	5.32	6.08	4.26	5.22	0.8	0.84	1.05	0.896667		WD40 repeat-like protein
gene01687	24.17	30.43	26.93	27.1767	29.12	16.79	26.66	24.19	21.54	20.17	16.97	19.56	8.55	26.88	11.03	15.4867		hypothetical protein
gene01688	364.3	337.08	287.87	329.75	389.7	346.36	474.62	403.56	445.6	366.62	352.34	388.187	202.47	611.78	360.57	391.607		cytochrome-c from the OXPHOS pathway
gene01689	19.34	37.44	31.99	29.59	52.57	48.2	34.99	45.2533	35.95	26.69	17.76	26.8	2.98	7.71	5.77	5.48667		hypothetical protein
gene01690	1323.73	1893.86	1338.59	1518.73	1962.14	2136.22	1604.59	1900.98	1498.79	1618.37	1713.81	1610.32	21.38	37.66	43.31	34.1167		NAD-dependent formate dehydrogenase
gene01691	13.28	19.16	23.54	18.66	17	17.11	17.76	17.29	18.92	19.54	17.49	18.65	2.88	9.26	7.04	6.39333		hypothetical protein
gene01692	35.34	48.36	42.3	42	92.91	106.05	100.32	99.76	76.94	80.22	73.45	76.87	5.87	17.64	14.21	12.5733		Di-copper centre-containing protein
gene01693	15.96	18.56	23.36	19.2933	15.78	11.99	13.32	13.6967	14.73	13.57	13.64	13.98	2.34	5.66	3.36	3.78667		alpha/beta-hydrolase
gene01694	0	0	0	0	0	0	0	0	0	0	0	0	0	0	0	0		hypothetical protein
gene01695	96.56	114.33	146.25	119.047	85.3	95.21	93.52	91.3433	95.41	88.08	81.24	88.2433	13.65	55.88	36.49	35.34	PRAF1	prenylated rab acceptor PRA1
gene01696	1614.96	1764.89	1736.92	1705.59	1888.43	1984.24	1830.19	1900.95	1658	1469.58	1499.22	1542.27	812.13	2042.63	1565.24	1473.33		hypothetical protein
gene01697	415.09	726.68	341.53	494.433	378.3	213.47	305.52	299.097	119.48	88.74	80.63	96.2833	4.32	16.3	21.6	14.0733		xylitol dehydrogenase
gene01698	48.81	53.87	51.05	51.2433	43.11	41.5	37.86	40.8233	41.82	35.78	34.91	37.5033	11.06	22.54	22.2	18.6		hypothetical protein
gene01699	0	0.21	0.22	0.143333	0	0	0	0	0.44	0.36	0.4	0.4	0.31	0.67	0.21	0.396667		hypothetical protein
gene01700	0.58	0.56	0.85	0.663333	0.55	0.33	0.06	0.313333	1.25	1.02	0.85	1.04	1.28	2.53	1.07	1.62667		hypothetical protein
gene01701	0	0	0	0	0	0	0	0	0	0	0	0	0	0	0	0		DNA/RNA polymerase
gene01702	0	0	0	0	0	0	0	0	0	0	0	0	0	0	0	0		hypothetical protein
gene01703	1.73	3.65	4.19	3.19	6.14	12.15	3.85	7.38	15.11	19.32	30.96	21.7967	0.61	0.67	0.35	0.543333		hypothetical protein
gene01704	10.5	2.04	1.67	4.73667	4.1	1.54	3.58	3.07333	10.16	14.55	6.09	10.2667	1128.65	1576.15	1245.52	1316.77		small heat shock protein
gene01705	16.56	17.03	18.08	17.2233	17.94	10.61	12.76	13.77	20.27	16.98	17.35	18.2	11.36	19.87	15.21	15.48		Clavaminate synthase-like protein
gene01706	51.88	94.78	99.2	81.9533	78.85	52.31	63.66	64.94	83.54	73.96	67.5	75	6.39	18.91	13.64	12.98		alpha/beta-hydrolase
gene01707	2771.41	1677.13	1141.17	1863.24	42.25	248.99	36	109.08	19.03	4.42	14.66	12.7033	3.72	3.23	16.43	7.79333		hypothetical protein
gene01708	1.72	5.76	6.32	4.6	8.85	4.89	9.69	7.81	9.52	4.89	5.14	6.51667	0.64	0.97	0.75	0.786667	alc	allantoicase
gene01709	8.24	13.54	11.08	10.9533	12.33	15.21	14.09	13.8767	16.71	13.91	14.68	15.1	14.49	22.25	17.15	17.9633		alpha/beta-hydrolase
gene01710	21.64	23.81	24.14	23.1967	24.43	28.66	34.64	29.2433	21.31	17.73	19.99	19.6767	20.49	37.56	34.9	30.9833	PXR1	TPR-like protein
gene01711	9.55	10.35	9.27	9.72333	9.66	9.45	10.93	10.0133	10.44	13.17	9.95	11.1867	2.79	8.88	4.97	5.54667		S-adenosyl-L-methionine-dependent methyltransferase
gene01712	0	0	0	0	0	0	0	0	0	0	0	0	0	0	0	0		hypothetical protein
gene01713	0	0	0	0	0	0	0	0	0	0	0	0	0	0	0	0		DNA/RNA polymerase
gene01714	0	0	0	0	0	0	0	0	0	0	0	0	0	0	0	0		hypothetical protein
gene01715	0	0	0	0	0	0	0	0	0	0	0	0	0	0	0	0		hypothetical protein
gene01716	0	0	0	0	0	0	0	0	0	0	0	0	0	0	0	0		hypothetical protein
gene01717	0.32	0.49	0.58	0.463333	0.12	0	0.31	0.143333	0.03	0.04	0.02	0.03	0.01	0.01	0	0.00666667		hypothetical protein
gene01718	0	0	0	0	0	0	0	0	0	0	0	0	0	0	0	0		hypothetical protein
gene01719	205.28	147.44	160.89	171.203	165.55	170.56	178.92	171.677	176.68	165.71	173.96	172.117	23.41	39.01	30.73	31.05		hypothetical protein
gene01720	8.85	9.09	11.51	9.81667	7.85	8.74	7.6	8.06333	8.44	8.85	8.74	8.67667	1.31	3.4	2.15	2.28667		hypothetical protein
gene01721	18.43	52.27	45.39	38.6967	132.87	103.53	113.64	116.68	194.61	108.88	91.81	131.767	9	14.17	7.84	10.3367		aromatic prenyltransferase
gene01722	33.79	74.38	66.47	58.2133	41.22	24.04	27.42	30.8933	24.28	28.08	18.59	23.65	1.46	7.85	3.53	4.28		hypothetical protein
gene01723	102.18	139.2	157.17	132.85	165.93	155.6	173.96	165.163	179.2	164.16	170.12	171.16	36.67	81.64	45.45	54.5867		hypothetical protein
gene01724	3.09	3.46	4.02	3.52333	3.86	2.78	1.5	2.71333	3.84	4.65	3.23	3.90667	0.67	0.93	1.21	0.936667		hypothetical protein
gene01725	0.06	0.13	0.27	0.153333	0.38	0.35	0.19	0.306667	0.34	0.5	0.57	0.47	0.04	0.11	0.03	0.06		hypothetical protein
gene01726	0	0	0	0	0	0	0	0	0	0	0	0	0.02	0	0	0.00666667		hypothetical protein
gene01727	26.21	30.94	23.63	26.9267	28.38	19.69	34.35	27.4733	35.51	22.11	27.53	28.3833	17.94	16.39	12.31	15.5467		hypothetical protein
gene01728	27.45	51.9	54.22	44.5233	54.12	51.78	59.34	55.08	43.39	38.13	41.05	40.8567	8.38	16.61	11.84	12.2767		hypothetical protein
gene01729	0.77	0	0	0.256667	0	0	0.27	0.09	0.3	0	0.56	0.286667	0.08	0.15	0.29	0.173333		hypothetical protein
gene01730	211.87	127	115.66	151.51	87.15	99.63	99.96	95.58	79.43	79.75	86.44	81.8733	23.47	48.65	38.87	36.9967	GPP34	Golgi phospho protein 3
gene01731	2.27	0.44	0.45	1.05333	0.42	1.36	2.82	1.53333	0.45	0	0.84	0.43	0.25	0.44	0.63	0.44		hypothetical protein
gene01732	0.96	1.31	1.81	1.36	7.77	4.59	9.59	7.31667	6.63	4.01	4.21	4.95	0.03	0.03	0	0.02		laccase
gene01733	2.44	1.68	1.91	2.01	1.95	1.24	1.75	1.64667	0.7	3.71	1.29	1.9	0	0.18	0	0.06		glycoside hydrolase
gene01734	82.24	84.6	91.68	86.1733	131.77	127.03	136.54	131.78	78.91	82.75	85	82.22	13.35	27.95	24.21	21.8367		NADH:flavin oxidoreductase/NADH oxidase
gene01735	0.55	1.02	1.17	0.913333	0.68	0.57	0.72	0.656667	0.73	0.41	1.19	0.776667	0.15	0.18	0.37	0.233333		hypothetical protein
gene01736	19.44	28.72	33.8	27.32	25.82	18.78	19.76	21.4533	25.74	21.81	17.32	21.6233	4.95	13.98	12.15	10.36		hypothetical protein
gene01737	2.59	0.98	5.73	3.1	8.8	10.2	9.7	9.56667	8.14	11.27	7.82	9.07667	1.22	1.7	1.45	1.45667		hypothetical protein
gene01738	226.98	266.43	183.92	225.777	332.8	271.49	364.64	322.977	387.19	279.98	383.37	350.18	67.6	60.23	80.27	69.3667		hypothetical protein
gene01739	2.88	2.97	2.61	2.82	2.44	1.7	1.61	1.91667	3.05	2.98	1.34	2.45667	0.36	1.12	0.91	0.796667		galactose mutarotase-like protein
gene01740	8.71	6.69	9.01	8.13667	7.42	5.91	8.41	7.24667	8.82	9.97	8.37	9.05333	2.18	0.95	0.77	1.3		hypothetical protein
gene01741	0	0	0	0	0	0	0	0	0	0	0	0	0	0	0	0		hypothetical protein
gene01742	0	0	0	0	0	0	0	0	0	0	0	0	0.03	0	0	0.01		hypothetical protein
gene01743	44.7	102.65	90.6	79.3167	108.13	119.48	111.98	113.197	117.83	93.86	99.49	103.727	18.83	44.85	28.66	30.78		hypothetical protein
gene01744	6.12	6.25	5.68	6.01667	6.53	5.97	6.13	6.21	5.27	4.54	3.57	4.46	1.39	3.13	3.23	2.58333		hypothetical protein
gene01745	0	0	0.42	0.14	0	0.42	0	0.14	0.84	0.34	1.16	0.78	0.46	0.21	0.2	0.29		hypothetical protein
gene01746	104.11	33.57	35.77	57.8167	32.78	33.94	29.43	32.05	27.81	37.91	27.1	30.94	22.55	40.06	45.48	36.03	FAP7	P-loop containing nucleoside triphosphate hydrolase protein
gene01747	11.65	10.22	12.69	11.52	15.65	18.48	13.28	15.8033	14.25	12.35	7.12	11.24	1.09	1.85	1.76	1.56667		hypothetical protein
gene01748	3.78	5.73	6.1	5.20333	3.66	1.29	2.68	2.54333	1.98	1.94	2.77	2.23	0.21	0.29	0.24	0.246667		hypothetical protein
gene01749	0.9	2.28	1.29	1.49	1.81	0.81	0.53	1.05	0.36	0.71	0.54	0.536667	0	0	0.15	0.05		hypothetical protein
gene01750	25.3	17.67	16.89	19.9533	12.84	15.18	11.36	13.1267	14.77	14.54	16.23	15.18	1.03	3.84	2.1	2.32333	IFA38	NAD(P)-binding protein
gene01751	20.36	26.69	29.58	25.5433	33.2	23.08	31.1	29.1267	32.16	28.38	24.95	28.4967	5.91	10.32	6.41	7.54667		hypothetical protein
gene01752	0	0	0	0	0	0	0	0	0	0	0.34	0.113333	0	0	0	0	IFA38	NAD(P)-binding protein
gene01753	18.48	18.59	16.55	17.8733	16.79	20.44	22.99	20.0733	18.63	21.5	23.9	21.3433	17.29	21.51	22.08	20.2933		hypothetical protein
gene01754	2	3.06	4.13	3.06333	3.27	2.68	1.65	2.53333	5.47	4.88	4.27	4.87333	1.27	2.61	2.12	2		hypothetical protein
gene01755	0.06	0.06	0.19	0.103333	0.24	0.59	0.3	0.376667	0.19	0.26	0.12	0.19	0.08	0	0.16	0.08		hypothetical protein
gene01756	0.79	0.75	0.6	0.713333	0.6	0.62	0.86	0.693333	0.47	0.69	0.77	0.643333	0.17	0.1	0.02	0.0966667		hypothetical protein
gene01757	180.74	165.67	182.7	176.37	178.02	212.47	196.44	195.643	185.27	179.39	190.31	184.99	13.52	25.32	31.65	23.4967		hypothetical protein
gene01758	1.06	1.62	1.29	1.32333	0.65	1.73	1.56	1.31333	4.41	3.59	2.58	3.52667	0.47	0.69	0.5	0.553333		hypothetical protein
gene01759	0	0	0	0	0	0	0	0	0	0	0	0	0	0	0	0		hypothetical protein
gene01760	0.46	0.3	0.41	0.39	1.15	0.95	0.66	0.92	1.35	1.1	0.67	1.04	0	0.22	0	0.0733333		hypothetical protein
gene01761	2.48	3.07	7.97	4.50667	12.49	15.2	13.56	13.75	12.8	12.88	11.44	12.3733	0.63	1.8	1.04	1.15667		ATP-dependent bile acid permease
gene01762	0	0	0	0	0	0	0	0	0	0	0	0	0	0	0	0		hypothetical protein
gene01763	0	0	0	0	0	0	0	0	0	0	0	0	0	0	0	0		hypothetical protein
gene01764	0	0	0	0	0	0	0	0	0	0	0	0	0	0	0	0		hypothetical protein
gene01765	0	0	0	0	0	0	0	0	0	0	0	0	0	0	0	0		hypothetical protein
gene01766	6.1	6.19	8.76	7.01667	16.28	20.38	13.97	16.8767	15.81	14.37	14.27	14.8167	0.54	1.56	0.72	0.94		ATP-dependent bile acid permease
gene01767	9.96	18.71	23.79	17.4867	21.55	24.24	21.3	22.3633	14.14	15.35	15.34	14.9433	1.38	4.81	2.62	2.93667		hypothetical protein
gene01768	59.62	175.7	186.73	140.683	185.62	164.96	167.34	172.64	181.83	180.84	185.56	182.743	3.49	13.44	14.11	10.3467		Het-C-domain-containing protein
gene01769	288.01	338.13	330.22	318.787	666.87	803.37	747.95	739.397	575.35	633.96	656.19	621.833	14.07	23.81	18.92	18.9333		alpha/beta-hydrolase
gene01770	15.38	26.95	25.51	22.6133	23.5	23.03	25.22	23.9167	20.98	21.12	21.33	21.1433	8.38	15.75	10.93	11.6867		TLD-domain-containing protein
gene01771	21.14	21.55	17.92	20.2033	15.2	18	16.73	16.6433	20.85	20.06	16.54	19.15	2.02	8.35	5.89	5.42		SET domain-containing protein
gene01772	11.74	10.45	8.02	10.07	4.95	3.78	3.12	3.95	7.31	5.81	3.88	5.66667	0.67	1	1.16	0.943333	IFA38	NAD(P)-binding protein
gene01773	1.69	3.15	1.16	2	0.69	0.37	0.06	0.373333	0.55	0.75	0.68	0.66	0	0	0	0		hypothetical protein
gene01774	0	0	0	0	0	0	0	0	0	0	0	0	0	0.04	0	0.0133333		subtilisin-like protein
gene01775	0	0	0	0	0	0	0	0	0	0	0	0	0	0	0	0		hypothetical protein
gene01776	0	0	0	0	0	0	0	0	0	0	0	0	0	0	0	0		hypothetical protein
gene01777	0	0	0	0	0	0	0	0	0	0	0	0	0	0	0	0		subtilisin-like protein
gene01778	0	0	0	0	0.62	0	0	0.206667	0	0	0	0	0	0	0	0		hypothetical protein
gene01779	1411.85	1949.75	1899.14	1753.58	2679.82	2668.24	2469.62	2605.89	1585.91	1641.81	1680.04	1635.92	112.53	323.5	264.61	233.547	gapA	glyceraldehyde 3-phosphate dehydrogenase
gene01780	0.29	0.94	1.09	0.773333	0.71	0.44	0.2	0.45	0.88	0.27	0.61	0.586667	0.06	0.12	0	0.06		hypothetical protein
gene01781	17.64	24.59	25.65	22.6267	18.98	13.59	18.52	17.03	17.78	15.09	14.14	15.67	4	7.19	6.14	5.77667		alpha/beta-hydrolase
gene01782	0.71	1.02	1.33	1.02	0.95	0.76	0.63	0.78	0.35	0.32	0.15	0.273333	0.07	0.13	0.13	0.11		subtilisin-like protein
gene01783	0	0	0	0	0	0	0	0	0	0	0	0	0	0	0	0		hypothetical protein
gene01784	0.31	0.23	0.47	0.336667	0.16	0.18	0.43	0.256667	0.24	0.24	0.27	0.25	0.19	0.38	0.33	0.3		hypothetical protein
gene01785	10.1	17.15	22.39	16.5467	22.62	19.48	20.74	20.9467	17.34	12.5	12.13	13.99	2.08	4.89	4.3	3.75667		ATP-dependent bile acid permease
gene01786	11.2	26.45	26.82	21.49	35.94	21.28	30.36	29.1933	22.95	16.68	15.67	18.4333	0.59	0.74	0.92	0.75		subtilisin-like protein
gene01787	18.15	26.82	25.64	23.5367	49.51	23.79	35.16	36.1533	10.68	10.58	8.12	9.79333	2.83	6.35	5.01	4.73		MFS general substrate transporter
gene01788	0	0	0	0	0	0	0.74	0.246667	0	0	0	0	0	0	0.37	0.123333		hypothetical protein
gene01789	10.41	8.1	6.24	8.25	68.77	59.52	47.44	58.5767	10.45	8.23	7.18	8.62	0.19	1.47	0.57	0.743333		hypothetical protein
gene01790	33.51	50.5	43.56	42.5233	44.75	44.12	47.55	45.4733	45.01	37.98	41.92	41.6367	4.44	13.55	13.53	10.5067		anti-silence-domain-containing protein
gene01791	6.86	7.62	7.63	7.37	9.6	4.26	8.51	7.45667	4.75	4.05	3.1	3.96667	0.03	0.12	0.2	0.116667	IFA38	NAD(P)-binding protein
gene01792	15.2	19.18	19.39	17.9233	17.24	16.36	19.47	17.69	24.95	21.62	18.84	21.8033	9.15	19.31	14.84	14.4333		hypothetical protein
gene01793	20.16	40.6	38.02	32.9267	90.11	93.77	102.58	95.4867	33.48	28.99	29.42	30.63	3.53	7.85	6.54	5.97333		putative alkaline phosphatase
gene01794	106.02	137.2	150.65	131.29	145.92	121.64	127.24	131.6	138.85	120.14	120.71	126.567	34.4	77.34	69.64	60.46		hypothetical protein
gene01795	20.85	34.58	49.41	34.9467	35.95	30.52	28.33	31.6	34.23	30.72	27.27	30.74	3.33	11.25	8.14	7.57333		hypothetical protein
gene01796	8.45	4.36	4.44	5.75	3.04	3.83	2.72	3.19667	7.07	6.55	5.62	6.41333	0.4	1.15	0.41	0.653333		hypothetical protein
gene01797	504.75	530.96	440.64	492.117	572.6	586.04	644.29	600.977	581.32	518.91	575.6	558.61	99.29	185.02	195.94	160.083		hypothetical protein
gene01798	11.18	19.29	29.32	19.93	19.51	18.17	14.97	17.55	22.45	22.16	18.39	21	5.91	16.15	10.97	11.01	CEBPZ	CBF-domain-containing protein
gene01799	93.89	78.74	96.32	89.65	76.97	66.61	74.99	72.8567	86.9	78.13	72.26	79.0967	60.52	103.66	73.64	79.2733		hypothetical protein
gene01800	7.21	14.15	9.53	10.2967	11.33	9.43	11.18	10.6467	4.19	3.56	3.69	3.81333	0.77	1.91	1.94	1.54		alpha/beta-hydrolase
gene01801	14.86	24.84	36.17	25.29	58.38	70.69	53.04	60.7033	75.28	87.13	73.26	78.5567	2.64	6.97	5.16	4.92333	psd	hypothetical protein
gene01802	0	0	0	0	0.01	0	0	0.00333333	0	0.07	0	0.0233333	0.01	0.05	0.01	0.0233333		DNA/RNA polymerase
gene01803	0	0	0	0	0	0	0	0	0	0	0	0	0	0	0	0		hypothetical protein
gene01804	2.62	0.63	0	1.08333	1.19	3.19	2.25	2.21	3.86	1.04	2.37	2.42333	0.34	0.3	0.86	0.5		hypothetical protein
gene01805	8.69	17.03	20.45	15.39	13.87	11.29	15.68	13.6133	10.74	9.64	9.61	9.99667	7.71	17.68	6.92	10.77		hypothetical protein
gene01806	216.14	335.19	265.81	272.38	240.68	262.55	311.64	271.623	259.99	283.44	303.59	282.34	95.86	198.66	160.14	151.553		hypothetical protein
gene01807	0	0	0	0	0	0	0	0	0	0	0	0	0	0	0	0		Retrovirus-related Pol polyprotein from transposon TNT 1-94
gene01808	4.81	6.92	6.86	6.19667	11.86	6.5	11.13	9.83	7.47	7.2	5.13	6.6	1.07	3.44	3.48	2.66333		hypothetical protein
gene01809	0	0	1.38	0.46	0	0	0.82	0.273333	0	0.75	0.43	0.393333	0	2.03	1.28	1.10333		hypothetical protein
gene01810	671.92	677.62	535.8	628.447	730.1	767.4	764.41	753.97	905.75	767.34	819.74	830.943	153.62	242.6	231.18	209.133		Mn superoxide dismutase
gene01811	1.1	1.86	1.38	1.44667	2.57	2.81	2.78	2.72	4.45	2.26	0.77	2.49333	1.41	1.17	0.97	1.18333		hypothetical protein
gene01812	2.45	4.94	5.4	4.26333	7.99	7.7	7.15	7.61333	12.79	11.92	13.26	12.6567	0.8	2.41	1.67	1.62667		hypothetical protein
gene01813	125.18	130.41	136.62	130.737	145.56	130.04	149.58	141.727	125.32	113.82	110.32	116.487	24.21	52.18	59.46	45.2833	hisS	histidyl-tRNA synthetase
gene01814	93.97	172.02	199.93	155.307	197.12	172.68	213.36	194.387	238.05	222.5	236.93	232.493	254.17	368.15	263.89	295.403		hypothetical protein
gene01815	3.81	1.92	1.64	2.45667	0.92	1.33	2.07	1.44	0	0.54	3.05	1.19667	1.47	2.16	0.79	1.47333		protein of unknown function
gene01816	104.61	75.29	84.38	88.0933	44.56	26.93	42.46	37.9833	4.39	4.66	4.29	4.44667	2.24	4.47	5.37	4.02667		protein of unknown function
gene01817	0.38	0.45	0	0.276667	0	0	0	0	0	0	0	0	0	0	0	0		hypothetical protein
gene01818	0.71	0.56	0.58	0.616667	0.25	0.43	0.39	0.356667	0.58	0.48	0.59	0.55	0.17	0.45	0.46	0.36		hypothetical protein
gene01819	2.26	4.13	4.68	3.69	3.16	2.11	2.26	2.51	3.14	2.19	2.11	2.48	0.49	0.96	0.33	0.593333		P-loop containing nucleoside triphosphate hydrolase protein
gene01820	0	0	0	0	0	0	0	0	0	0	0	0	0	0	0	0		hypothetical protein
gene01821	8.73	20.15	22.69	17.19	14.54	11.41	13.95	13.3	14.18	12.05	11.17	12.4667	3.05	6.9	4.08	4.67667		P-loop containing nucleoside triphosphate hydrolase protein
gene01822	0	0	0	0	0	0	0	0	0	0	0	0	0	0	0	0		P-loop containing nucleoside triphosphate hydrolase protein
gene01823	0	0	0	0	0	0	0	0	0	0	0	0	0	0	0	0		hypothetical protein
gene01824	0.69	1.98	2.07	1.58	1.31	0.7	1.32	1.11	1.43	1.41	1.29	1.37667	0.29	0.69	0.34	0.44		P-loop containing nucleoside triphosphate hydrolase protein
gene01825	0	0	0	0	0	0	0	0	0	0	0	0	0	0	0	0		hypothetical protein
gene01826	1.27	2.43	3.38	2.36	3.44	2.17	2.35	2.65333	2.29	2.47	1.63	2.13	0.52	1.28	0.62	0.806667		P-loop containing nucleoside triphosphate hydrolase protein
gene01827	0	0	0	0	0	0	0	0	0	0	0	0	0	0	0	0		hypothetical protein
gene01828	0	0.48	0.16	0.213333	0.09	0	0	0.03	0.14	0	0.11	0.0833333	0	0.13	0	0.0433333		P-loop containing nucleoside triphosphate hydrolase protein
gene01829	0	0	0	0	0	0	0	0	0	0	0	0	0	0	0	0		hypothetical protein
gene01830	3.03	4.91	6.89	4.94333	5	3.63	4.04	4.22333	5.34	3.18	3.41	3.97667	1.15	2.09	1.01	1.41667		P-loop containing nucleoside triphosphate hydrolase protein
gene01831	267.08	302.08	308.61	292.59	291.64	266.61	317.6	291.95	324.96	294.73	303.98	307.89	60.18	143.26	89.97	97.8033		hypothetical protein
gene01832	34.85	3.12	1.6	13.19	0.37	0.81	0.36	0.513333	0	0	0.37	0.123333	0	0.4	0.19	0.196667		hypothetical protein
gene01833	2.52	2.57	2.92	2.67	2.23	2.15	1.68	2.02	2.94	1.73	0.74	1.80333	0.15	0.27	0.26	0.226667		hypothetical protein
gene01834	3.8	2.38	3.54	3.24	2.59	2.83	1.7	2.37333	3.27	3.04	3.15	3.15333	0.58	1.62	1.47	1.22333		RNA-binding domain-containing protein
gene01835	1.44	1.05	0.95	1.14667	1.01	0.83	0.75	0.863333	0.82	0.33	0.13	0.426667	0.4	0.65	0	0.35		protein of unknown function
gene01836	21.91	33.45	29.55	28.3033	29.23	26.3	30.33	28.62	32.99	31.67	33.29	32.65	3.12	8.55	6.16	5.94333		hypothetical protein
gene01837	1.24	1.22	1.96	1.47333	3.92	2.43	1.67	2.67333	2.68	2.87	2.08	2.54333	0.49	0.67	1.27	0.81		hypothetical protein
gene01838	2.6	5.26	10.21	6.02333	7.38	5.52	6.03	6.31	7.29	5.29	5.2	5.92667	0.97	2.48	1.61	1.68667		hypothetical protein
gene01839	879.99	871.36	632.85	794.733	679.05	545.92	651.99	625.653	589.33	478.95	598.29	555.523	78.37	234.14	197.53	170.013		hypothetical protein
gene01840	313.26	386.66	338.48	346.133	284.34	254.71	244.96	261.337	220	147.99	219.62	195.87	62.27	112.4	96.12	90.2633	ATP14	hypothetical protein
gene01841	24.05	37.32	55.45	38.94	44.03	33.91	42.79	40.2433	48.55	43.07	38.46	43.36	47.1	77.94	58.96	61.3333	RPO41	DNA/RNA polymerase
gene01842	7.62	4.82	3.09	5.17667	8.49	15.46	11.66	11.87	15.61	13.25	15.81	14.89	4.54	11.25	10.83	8.87333	psd	hypothetical protein
gene01843	1.39	1.22	1.07	1.22667	3.65	2.4	1.8	2.61667	3.75	3.3	2.18	3.07667	0.26	0.05	0.2	0.17		hypothetical protein
gene01844	1.34	2.61	2.49	2.14667	6.21	4.91	6.6	5.90667	8.22	10.16	8.75	9.04333	0.44	0.8	0.77	0.67	abfA	glycoside hydrolase
gene01845	51.82	75.31	109.32	78.8167	145.09	323.56	493.85	320.833	122.97	212.52	150.54	162.01	3.78	8.5	7.4	6.56		heme-thiolate peroxidase
gene01846	30.43	48.12	43.09	40.5467	54.81	50.61	43.77	49.73	92.93	101.54	129.19	107.887	15.12	24.01	23.35	20.8267		hypothetical protein
gene01847	24.74	15.42	12.61	17.59	17.96	18.09	10.18	15.41	27.12	53.06	56.9	45.6933	1.49	6.88	7.25	5.20667		hypothetical protein
gene01848	37.85	18.05	9.09	21.6633	23.8	19.05	15.71	19.52	19.01	19.96	32.78	23.9167	1.07	4.22	8.48	4.59		hypothetical protein
gene01849	35.07	23.89	25.51	28.1567	22.94	18.66	25.03	22.21	32.28	28.98	25.94	29.0667	7.61	20.97	20.53	16.37		P-loop containing nucleoside triphosphate hydrolase protein
gene01850	74.71	99.14	107.68	93.8433	130.74	148.32	133.88	137.647	192.3	202.16	216.06	203.507	10.45	29.5	24.71	21.5533		hypothetical protein
gene01851	0	0	0	0	0	0.68	0	0.226667	0.69	0	0	0.23	0	0	0	0		hypothetical protein
gene01852	126.35	120.6	123.36	123.437	105.51	113.42	104.86	107.93	135.42	116.12	132.97	128.17	9.41	20.52	20.3	16.7433		hypothetical protein
gene01853	128.91	110.2	102.76	113.957	114.27	122.78	118.17	118.407	112.98	103	104.34	106.773	10.48	24.87	28.05	21.1333		cysteine proteinase
gene01854	0.94	1.27	1.29	1.16667	0.85	0.64	1.07	0.853333	1.23	1.38	0.68	1.09667	0.56	1.36	1.08	1		hypothetical protein
gene01855	2.01	1.38	0.87	1.42	0.76	1.66	1.33	1.25	1.13	1.54	0.87	1.18	0.41	0.4	0.42	0.41		hypothetical protein
gene01856	13.99	14.72	17.73	15.48	17.84	11.71	13.53	14.36	19.08	14.71	13.41	15.7333	10.62	24.51	15.34	16.8233		hypothetical protein
gene01857	9.26	11.94	12.45	11.2167	13.82	10.83	10.91	11.8533	12.25	10.9	9.39	10.8467	1.57	3.67	2.5	2.58		hypothetical protein
gene01858	15.34	20.4	21.91	19.2167	17.46	14.54	15.39	15.7967	23.22	21.92	19.74	21.6267	4.11	9.51	8.02	7.21333	DEG1	tRNA pseudouridine synthase
gene01859	279.19	40.24	46.48	121.97	57.51	42.53	46.51	48.85	44.71	36.4	35.77	38.96	6.87	5.73	4.9	5.83333		glycoside hydrolase
gene01860	94.06	94.81	29.6	72.8233	6.71	7.68	10.84	8.41	7.43	9.87	8.68	8.66	5.14	5.83	3.3	4.75667		hypothetical protein
gene01861	3.42	2.63	2.98	3.01	1.72	0.98	1.47	1.39	1.99	3.61	2.6	2.73333	0.13	0.51	0.39	0.343333		O-methyltransferase
gene01862	2.34	4.28	4.37	3.66333	2.87	3.15	1.63	2.55	15	37.12	37.4	29.84	0.39	0.46	0.27	0.373333		O-methyltransferase
gene01863	0	0	0	0	0	0	0	0	0	0	0	0	0	0	0	0		hypothetical protein
gene01864	0	0	0	0	0	0	0	0	0	0	0	0	0	0	0	0		hypothetical protein
gene01865	9.09	5.12	7.14	7.11667	6.68	9.1	8.95	8.24333	19.09	21.02	21.47	20.5267	17.27	14.56	17.42	16.4167		O-methyltransferase
gene01866	126.89	172.05	56.43	118.457	9.64	12.2	11.77	11.2033	11.76	15.39	14.81	13.9867	8.64	16.51	19	14.7167		hypothetical protein
gene01867	57.32	68.58	64.59	63.4967	50.1	38.17	43.9	44.0567	50.51	42.19	39.18	43.96	2.25	3.79	3.59	3.21		O-methyltransferase
gene01868	740.68	1340.68	1607.17	1229.51	1530.26	1253.14	1469.46	1417.62	628.76	579.36	470.78	559.633	194.73	429.36	276.32	300.137	htpG	heat shock protein 90
gene01869	32.22	36.99	33.69	34.3	53.93	55.01	46.59	51.8433	95.95	98.59	97.15	97.23	27.23	36.35	29.17	30.9167		alpha/beta-hydrolase
gene01870	0.58	0.65	0.94	0.723333	0.55	0.51	0.61	0.556667	0.54	0.67	0.38	0.53	0.55	1.05	0.76	0.786667		hypothetical protein
gene01871	0.31	0.33	0.23	0.29	0	0.23	0.32	0.183333	0.12	0	0.21	0.11	0.2	0.49	0.23	0.306667		hypothetical protein
gene01872	39.64	39.07	33.33	37.3467	29.59	31.3	29.28	30.0567	27.8	19.74	24.84	24.1267	9.02	23.41	15.53	15.9867		hypothetical protein
gene01873	7.54	3.98	0.69	4.07	0.32	0.52	0.79	0.543333	0.35	0.85	0.32	0.506667	0.85	0.99	1.62	1.15333		hypothetical protein
gene01874	37.66	43.12	50.72	43.8333	42.14	34.48	35.27	37.2967	37.46	39.42	41.44	39.44	8.84	22.76	16.63	16.0767		hypothetical protein
gene01875	0	0	0	0	0	0	0	0	0	0	0	0	0	0	0	0		hypothetical protein
gene01876	0	0	0	0	0	0	0	0	0	0	0	0	0	0	0	0	htpG	HSP90-domain-containing protein
gene01877	0.47	0.46	0.34	0.423333	0.41	0.23	0.32	0.32	0.52	0.25	0.39	0.386667	0.33	1.29	0.23	0.616667		hypothetical protein
gene01878	0	0	0.05	0.0166667	0	0	0	0	0	0.11	0.04	0.05	0.11	0.22	0.05	0.126667		hypothetical protein
gene01879	7.07	11.65	11.37	10.03	9.48	11.08	10.15	10.2367	20.84	22.11	22.11	21.6867	1.89	4.06	2.47	2.80667		alpha/beta-hydrolase
gene01880	0.1	0.11	0.47	0.226667	0	0	0	0	0	0.19	0	0.0633333	0.1	0.25	0.48	0.276667		hypothetical protein
gene01881	0.06	0.12	0.25	0.143333	0.12	0.45	0.35	0.306667	0.5	0.36	0	0.286667	0.61	1.04	0.41	0.686667		hypothetical protein
gene01882	0.17	0	0	0.0566667	0.19	0	0.18	0.123333	0	0.33	0	0.11	0.11	0.31	0.49	0.303333		hypothetical protein
gene01883	20.38	25.08	25.14	23.5333	14.53	10.46	18.07	14.3533	14.01	16.86	20.92	17.2633	1.16	4.7	4.57	3.47667		hypothetical protein
gene01884	0.4	0.67	0.93	0.666667	0.22	0	0.21	0.143333	0	0	0.22	0.0733333	0.13	0.12	0	0.0833333		hypothetical protein
gene01885	1.99	1.73	2.69	2.13667	2.94	1.95	2.69	2.52667	1.02	1.85	0.42	1.09667	0.23	0.42	0.51	0.386667		hypothetical protein
gene01886	0.56	0.63	0.65	0.613333	0	0	0	0	0.65	0.53	0	0.393333	0.27	0.49	0.62	0.46		hypothetical protein
gene01887	0.85	0.57	0	0.473333	0.18	0.2	1.07	0.483333	0.2	0.32	0.36	0.293333	0.96	2.03	1.35	1.44667		hypothetical protein
gene01888	1.43	1.57	1.03	1.34333	0.41	0.15	0.14	0.233333	1.19	0.24	0	0.476667	0	0.31	0.37	0.226667		hypothetical protein
gene01889	0.69	0.63	0.39	0.57	0.12	0.53	1.19	0.613333	0.66	1.39	0.72	0.923333	0.91	0.96	0.79	0.886667		hypothetical protein
gene01890	8.97	27.18	32.4	22.85	78.72	64.89	69.41	71.0067	50.87	44.5	36.76	44.0433	1.11	1.91	1.38	1.46667		hypothetical protein
gene01891	4.91	4.13	5.51	4.85	5.73	3.34	4.2	4.42333	5.05	4.39	4.04	4.49333	3.03	4.39	3.86	3.76	PLB	hypothetical protein
gene01892	653.99	554.27	576.3	594.853	356.03	240.1	328.15	308.093	288.22	271.98	266.32	275.507	180.78	279.34	281.31	247.143		hypothetical protein
gene01893	50.8	81.41	77.35	69.8533	65.94	51.55	89.55	69.0133	134.14	114.71	113.53	120.793	14.6	39.91	29.49	28		hypothetical protein
gene01894	19.81	20.89	19.68	20.1267	18.86	19.96	21.46	20.0933	29.72	28.29	29.79	29.2667	1.2	4.44	3.25	2.96333		DUF1479-domain-containing protein
gene01895	8.01	6.71	5.37	6.69667	4.04	2.95	2.53	3.17333	6.75	4.42	3.29	4.82	3.57	4.1	3.17	3.61333		hypothetical protein
gene01896	0	0	0	0	0	0	0	0	0	0	0	0	0	0	0	0		hypothetical protein
gene01897	0.9	0.99	0.44	0.776667	1.91	1.34	1.87	1.70667	0.88	0.72	1.9	1.16667	0.77	0.77	1.39	0.976667		hypothetical protein
gene01898	0.51	0	0	0.17	0	0	0	0	0	0	0	0	0.17	0	0	0.0566667		hypothetical protein
gene01899	0	0	0	0	0	0	0	0	0	0	0	0	0.28	0	0	0.0933333		hypothetical protein
gene01900	36.09	39.36	50.58	42.01	41.56	40.11	28.58	36.75	44.11	37.23	34.83	38.7233	13	27.64	21.61	20.75		hypothetical protein
gene01901	11.98	16.89	17.5	15.4567	13.5	15.06	15.43	14.6633	14.95	12.02	11.32	12.7633	2.87	6.3	4.64	4.60333		hypothetical protein
gene01902	31.17	37.21	30.8	33.06	33.16	29.78	35.98	32.9733	34.74	27.67	30.59	31	10.86	26.39	18.57	18.6067		hypothetical protein
gene01903	0	0	0	0	0	0	0	0	0	0	0	0	0	0	0	0		galactose oxidase
gene01904	1.49	1.79	3.04	2.10667	2.56	2.85	1.59	2.33333	2.61	2.44	2.32	2.45667	0.75	1.74	0.89	1.12667		hypothetical protein
gene01905	0	0	0	0	0	0	0	0	0	0	0	0	0	0	0	0		hypothetical protein
gene01906	8.94	19.18	34.11	20.7433	28.56	20.8	27.82	25.7267	32.86	32.3	24.69	29.95	4.4	13.47	10.79	9.55333		galactose oxidase
gene01907	0.3	0	0.46	0.253333	0.32	0.23	0	0.183333	0	0.19	0.11	0.1	0.07	0	0.12	0.0633333		hypothetical protein
gene01908	51.57	59.98	56.94	56.1633	86.76	76.43	82.9	82.03	103.85	79.56	86.26	89.89	10.03	14.75	13.49	12.7567	lldD	hypothetical protein
gene01909	1.32	2.72	1.68	1.90667	1.32	1.51	1.11	1.31333	9.11	10.12	10.71	9.98	3.12	6.46	9.86	6.48	PLB	hypothetical protein
gene01910	136.21	80.59	96.2	104.333	50	56.34	64.93	57.09	32.15	25	23.88	27.01	2.88	8.54	8.33	6.58333		hypothetical protein
gene01911	50.71	39.62	39.71	43.3467	32.26	33.95	30.51	32.24	36.94	34.59	36.37	35.9667	21.24	39.95	39.03	33.4067		hypothetical protein
gene01912	13.65	26.75	47.04	29.1467	44.3	42.55	55.6	47.4833	41.22	27.8	25.71	31.5767	19.54	44.66	27.1	30.4333		hypothetical protein
gene01913	15.95	20.01	26.94	20.9667	28.95	22.14	26.77	25.9533	23.34	22.15	20.4	21.9633	5.18	13.83	10.71	9.90667		hypothetical protein
gene01914	2.75	1.86	20.71	8.44	12.21	3.48	3.73	6.47333	6.27	15.76	23.64	15.2233	1.51	4.14	10.29	5.31333		hypothetical protein
gene01915	0.7	1.61	1.86	1.39	1.47	1	2.08	1.51667	2.08	1.13	2.19	1.8	0.29	0.94	0.5	0.576667		hypothetical protein
gene01916	55.41	77.53	89.95	74.2967	81.66	71.35	73.13	75.38	88.91	81.4	75.2	81.8367	20.92	45.38	37.48	34.5933		hypothetical protein
gene01917	11.84	11.21	21.14	14.73	12.47	13.2	11.05	12.24	18.48	16.89	12.13	15.8333	4.17	9.83	5.65	6.55		hypothetical protein
gene01918	0	0	0.04	0.0133333	0	0	0.07	0.0233333	0.04	0.06	0.18	0.0933333	0.06	0.08	0.04	0.06		hypothetical protein
gene01919	0	0	0	0	0	0	0	0	0	0	0	0	0	0	0	0		hypothetical protein
gene01920	0	0	0	0	0	0	0	0	0	0	0	0	0	0	0	0		predicted protein
gene01921	0	0	0	0	0	0	0	0	0	0	0	0	0	0	0	0		hypothetical protein
gene01922	0	0	0	0	0	0	0	0	0.05	0	0	0.0166667	0	0	0	0		polyprotein
gene01923	11.84	5.04	11.92	9.6	13.39	10.69	6.17	10.0833	15.82	13.2	7.61	12.21	3.35	8.79	8.76	6.96667		hypothetical protein
gene01924	120.31	105.13	114.58	113.34	138.37	228.34	410.83	259.18	114.33	130.83	120.63	121.93	10.2	27.24	17.95	18.4633		hypothetical protein
gene01925	37.99	31.65	40.17	36.6033	25.27	20.63	21.57	22.49	26.63	21.01	22.9	23.5133	5.54	13.84	10.97	10.1167	UTP19	CBF-domain-containing protein
gene01926	10.44	12.2	16.24	12.96	22.98	16.64	23.82	21.1467	46.78	46.75	31.2	41.5767	10.73	28.85	25.17	21.5833		hypothetical protein
gene01927	35.52	42.98	42.94	40.48	63.09	49.18	72.33	61.5333	96.46	89.12	87.68	91.0867	17.08	53.96	40.71	37.25		hypothetical protein
gene01928	81.32	70.8	87.17	79.7633	72.11	48.58	61.84	60.8433	62.58	53.67	45.19	53.8133	15.07	40.42	29.26	28.25		hypothetical protein
gene01929	39.67	70.52	87.52	65.9033	129.49	139.96	175.64	148.363	267.76	293.16	304.65	288.523	27.8	85.55	55.27	56.2067		iron permease
gene01930	468.32	343.99	185.03	332.447	617.84	702.77	450.7	590.437	1125.23	1856.38	1511.83	1497.81	419.8	1056.62	1145.29	873.903		hypothetical protein
gene01931	24.65	34.7	38.6	32.65	52.23	49.98	46.99	49.7333	88.48	108.23	87.8	94.8367	42.64	89.94	76.57	69.7167		beta-lactamase/transpeptidase-like protein
gene01932	9.12	24.86	32.19	22.0567	40.78	35.71	47.04	41.1767	52.42	62.43	47.63	54.16	16.06	31.56	26.54	24.72		hypothetical protein
gene01933	64.47	94.86	101.17	86.8333	90.36	76.33	83.17	83.2867	110.09	100.62	93.26	101.323	17.33	41.81	28.16	29.1		beta-lactamase/transpeptidase-like protein
gene01934	1.72	2.07	2.14	1.97667	2.21	3.74	3.36	3.10333	2.93	5.04	4.59	4.18667	0.35	0.74	0.16	0.416667		hypothetical protein
gene01935	46.31	91.19	104.27	80.59	150.84	122.27	141.34	138.15	103.51	98.5	71.67	91.2267	4.54	10.92	7.83	7.76333	PLB	hypothetical protein
gene01936	0.82	0.9	1.31	1.01	1.22	1.14	0.17	0.843333	0.94	0.77	0.52	0.743333	0.65	1.66	0.83	1.04667		hypothetical protein
gene01937	0.15	0.37	0.27	0.263333	0.1	0.17	0.1	0.123333	0.06	0.09	0.05	0.0666667	0.57	0.62	0.25	0.48		hypothetical protein
gene01938	0	0	0	0	0	0.02	0	0.00666667	0.02	0	0.04	0.02	0	0	0.01	0.00333333		hypothetical protein
gene01939	6.73	6.05	4.24	5.67333	8.12	7.88	8.3	8.1	5.73	9.11	5.64	6.82667	5.8	17.07	13.2	12.0233		hypothetical protein
gene01940	3.47	8.84	7.49	6.6	16.74	5.7	12.86	11.7667	4.32	4.16	1.74	3.40667	0.08	1.51	1.82	1.13667		P-loop containing nucleoside triphosphate hydrolase protein
gene01941	47.18	68.94	166.75	94.29	107.01	96.85	103.85	102.57	98.87	82.73	103.95	95.1833	24.07	70.88	55.44	50.13	CRM1	hypothetical protein
gene01942	56.97	90.61	127.45	91.6767	127.77	111.23	120.85	119.95	102.37	101.02	86.62	96.67	11.42	37.84	27.55	25.6033	CRM1	hypothetical protein
gene01943	3.44	8.77	11.5	7.90333	7.13	11.03	11.6	9.92	15.55	12.76	10.71	13.0067	9.32	26.42	16.04	17.26		hypothetical protein
gene01944	4.88	5.45	4.82	5.05	4.25	2.42	2.29	2.98667	6.41	5.78	4.7	5.63	2.26	4.46	2.65	3.12333		hypothetical protein
gene01945	73.86	119.35	144.34	112.517	156.47	141.85	147.98	148.767	139.97	128.16	119.62	129.25	13.68	32.35	28.05	24.6933	leuS	leucyl-tRNA synthetase
gene01946	11.57	26.53	28.28	22.1267	22.92	22.91	33.03	26.2867	17.32	15.89	17.02	16.7433	10.99	31.01	5.81	15.9367		hypothetical protein
gene01947	5.34	13.43	17.97	12.2467	11.97	8.83	10.8	10.5333	11.01	8.54	7.59	9.04667	0.43	1.67	0.79	0.963333		hypothetical protein
gene01948	130.51	282.39	315.88	242.927	363.61	278.98	343	328.53	245.17	191.39	192.63	209.73	57.53	131.28	84.72	91.1767		hypothetical protein
gene01949	2.96	4.41	4.05	3.80667	4.18	4.03	4.58	4.26333	2.9	3.42	3.85	3.39	1.7	1.96	1.21	1.62333	mpn	RBPa precursor
gene01950	61.48	51.89	48.34	53.9033	29.57	26.83	25.16	27.1867	37.39	38.24	32.15	35.9267	13.07	33.17	30.73	25.6567		Mak16 protein
gene01951	115.82	85.28	79.85	93.65	67.06	49.64	56.49	57.73	54.13	53.66	53.63	53.8067	12.06	27.31	24.37	21.2467	RPA2	replication protein A, subunit RPA32
gene01952	7.76	13.22	15.55	12.1767	12.03	8.66	11.47	10.72	13.75	14.33	12.27	13.45	2.55	5.9	4.39	4.28		hypothetical protein
gene01953	9.18	10.92	7.98	9.36	8.2	8.16	7.83	8.06333	14.65	12.03	10.27	12.3167	5.41	13.19	8.3	8.96667		putative acetyl xylan esterase
gene01954	0	0	0	0	0	0	0	0	0	0	0	0	0	0	0	0		hypothetical protein
gene01955	2.27	4.5	11.53	6.1	7.54	7.05	5.93	6.84	7.88	6.7	4.75	6.44333	1.55	4.05	3	2.86667	REA1	P-loop containing nucleoside triphosphate hydrolase protein
gene01956	110.55	149.34	148.24	136.043	143.68	133.46	145.96	141.033	131.52	120.96	143.74	132.073	8.6	19.17	18.14	15.3033	ORP9_10_11	Oxysterol-binding protein
gene01957	42.52	26.21	25.95	31.56	24.26	24.81	26.05	25.04	22.4	18.36	12.07	17.61	9.16	19.62	24.2	17.66		hypothetical protein
gene01958	0	0	0	0	0	0	0	0	0	0	0	0	0	0	0	0		hypothetical protein
gene01959	0	0	0	0	0	0	0	0	0	0	0	0	0	0	0	0		hypothetical protein
gene01960	88.53	79.56	82.9	83.6633	55.73	48.84	45.48	50.0167	55.25	50.58	49.55	51.7933	17.07	54.42	50.87	40.7867	IST3	hypothetical protein
gene01961	133.48	161.15	170.88	155.17	130.94	97.55	111.45	113.313	111.46	104.04	104.36	106.62	66.6	120.25	112.16	99.67		translation initiation factor eIF-3, subunit D
gene01962	5.25	6.71	4.22	5.39333	8.33	4.22	6.99	6.51333	7.93	3.85	8.29	6.69	4.12	10.46	8.2	7.59333		hypothetical protein
gene01963	62.23	40.36	36.03	46.2067	33.29	28.86	33.4	31.85	30.67	26.79	27.56	28.34	12.65	23.85	21.19	19.23		Metallo-dependent phosphatase
gene01964	7.21	6.41	8.24	7.28667	6.41	5.48	4.89	5.59333	12.87	13.44	10.93	12.4133	2.88	5.48	4.4	4.25333		soluble quino protein glucose dehydrogenase
gene01965	7.98	12.21	12.22	10.8033	16.04	15.41	15.7	15.7167	15.06	13.32	11.49	13.29	2.26	5.51	2.85	3.54		hypothetical protein
gene01966	4.3	4.26	6.89	5.15	3.08	2	2.47	2.51667	2.81	2.63	2.39	2.61	0.79	1.81	1.04	1.21333		hypothetical protein
gene01967	40.02	47.57	54.43	47.34	38.15	45.84	34.65	39.5467	46.79	42.55	38.33	42.5567	9.63	20.87	12.5	14.3333	EAP45	hypothetical protein
gene01968	6.38	11.85	15.41	11.2133	17.39	21.08	15.75	18.0733	26.78	32.56	33.08	30.8067	6.39	12.97	9.14	9.5		hypothetical protein
gene01969	14.14	20.41	20.65	18.4	20.81	24.03	16.86	20.5667	20.59	18.5	19.79	19.6267	4.48	9.98	9.64	8.03333		hypothetical protein
gene01970	13.9	35.61	32.03	27.18	47.61	47.38	29.57	41.52	41.68	22.9	21.21	28.5967	6.01	12	12.05	10.02		hypothetical protein
gene01971	4.73	6.17	9.82	6.90667	6.41	4.02	4.41	4.94667	5.81	6.43	4.97	5.73667	2.14	8.22	7.04	5.8		hypothetical protein
gene01972	24.83	18.11	17.63	20.19	15.65	14.32	15.62	15.1967	20.66	15.45	15.15	17.0867	6.47	8.27	7.71	7.48333		MFS general substrate transporter
gene01973	35.64	41.22	46.98	41.28	41.88	38.26	42.47	40.87	41.25	33.63	29.77	34.8833	3.46	9.71	7.01	6.72667		hypothetical protein
gene01974	0	0	0	0	0	0	0	0	0	0	0	0	0	0	0	0		tRNA-Arg
gene01975	21.43	30.24	48.28	33.3167	52.92	59.89	73.7	62.17	83.76	84.69	82.27	83.5733	79.36	159.16	93.22	110.58		hypothetical protein
gene01976	162.26	108.94	105.38	125.527	109.93	149.7	142.99	134.207	119.86	130.72	117.47	122.683	24.4	64.57	53.12	47.3633	UBC7	ubiquitin-conjugating enzyme
gene01977	39.79	47.39	49.31	45.4967	37.31	40.13	45.41	40.95	39.91	40.37	33.14	37.8067	10.34	24.54	16.01	16.9633		hypothetical protein
gene01978	11.67	5.61	4.16	7.14667	18.14	53.35	52.19	41.2267	12.13	15.54	14.19	13.9533	1.32	2.75	3.63	2.56667		hypothetical protein
gene01979	380.81	241.82	233.65	285.427	204.12	169.79	187.15	187.02	174.26	170.57	149.67	164.833	31.45	84.16	83.58	66.3967		Prefoldin, subunit 3
gene01980	9.87	9.6	10.99	10.1533	9.29	14.97	11.53	11.93	18.21	16.95	20.36	18.5067	18.35	42.29	32.01	30.8833		ankyrin
gene01981	24.42	37.99	38.33	33.58	47.73	63.07	41.14	50.6467	23.67	20.72	17.3	20.5633	4.47	19.52	18.15	14.0467		hypothetical protein
gene01982	57.12	74.25	47.08	59.4833	56.87	92.93	55.07	68.29	35.59	27.68	24.4	29.2233	14.25	44.99	43.87	34.37		chitotriosidase-1 isoform 2
gene01983	25.59	46.71	35.53	35.9433	19.25	26.05	17.64	20.98	6.4	4.79	4.2	5.13	1.56	7.58	9.95	6.36333		hypothetical protein
gene01984	206.94	457.39	490.19	384.84	459.15	409.27	431.37	433.263	766.89	768.06	803.43	779.46	28.58	61.82	90.52	60.3067	glgP	glycosyltransferase family 35 protein
gene01985	13.4	37.46	58.39	36.4167	43.62	39.64	39.51	40.9233	52.08	47.16	40.81	46.6833	8.76	22.84	15.29	15.63		hypothetical protein
gene01986	20.53	27.51	33.7	27.2467	23.28	20.34	20.04	21.22	25.83	22.21	21	23.0133	8.04	16.86	14.18	13.0267		L domain-like protein
gene01987	13.22	51.74	67.05	44.0033	90.28	60.24	50.27	66.93	85.86	55.62	42.05	61.1767	2.99	8.29	5.23	5.50333		STE3-domain-containing protein
gene01988	53.61	87.61	110.29	83.8367	63.94	65.27	60.65	63.2867	61.14	57.59	49.01	55.9133	16.52	44.31	30.4	30.41	NHE6_7	sodium/hydrogen exchanger
gene01989	39.45	81.16	71.33	63.98	31.59	38.91	45.62	38.7067	56	52.59	42.61	50.4	16.35	24.22	14.36	18.31		hypothetical protein
gene01990	0	0	0	0	0	0	0	0	0	0	0	0	0	0	0	0		STE3-domain-containing protein
gene01991	0	0	0	0	0	0	0	0	0	0	0	0	0	0	0	0		hypothetical protein
gene01992	0	0	0	0	0	0	0	0	0	0	0	0	0	0	0	0		hypothetical protein
gene01993	0	0	0	0	0	0	0	0	0	0	0	0	0	0	0	0		hypothetical protein
gene01994	0	0	0	0	0	0	0	0	0	0	0	0	0	0	0	0		STE3-like pheromone receptor
gene01995	0.15	0.15	0.08	0.126667	0.2	0.1	0.23	0.176667	0.27	0.27	0.23	0.256667	0.06	0.05	0.05	0.0533333		Pkinase-domain-containing protein
gene01996	0	0	0	0	0	0	0	0	0	0	0	0	0	0	0	0		hypothetical protein
gene01997	0	0	0	0	0	0	0	0	0	0	0	0	0	0	0	0		hypothetical protein
gene01998	47.47	69.78	65.1	60.7833	61.97	66.53	76.6	68.3667	48.56	47.93	47.3	47.93	11.32	21.04	18.35	16.9033		zf-DHHC-domain-containing protein
[truncated: 12,275 more rows]
