# Supplementary material for: Transcriptomic, and metabolic profiling reveals adaptive mechanisms of Auricularia heimuer to temperature stress
Source: PeerJ. 2025 Jul 21;13:e19713. doi: 10.7717/peerj.19713 (PMC12288747; doi:10.7717/peerj.19713)
Supplement: Supplemental Information 4 [file peerj-13-19713-s004.xlsx]

## Sheet: Sheet1
Supplemental Table 4 Differential co-expressed genes in three groups
Number	Pathway ID	Description	Database	Ratio_in_study	Ratio_in_pop	Rich factor	Pvalue	Padjust	First Category	Second Category	Gene_ids	Gene_names
2	map00590	Arachidonic acid metabolism	KEGG PATHWAY	2/ 45	22/ 4219	0.0909091	0.0224441	0.246886	Metabolism	Lipid metabolism	gene11676	PLB
											gene02360	—
2	map00790	Folate biosynthesis	KEGG PATHWAY	2/ 45	18/ 4219	0.111111	0.0152717	0.335978	Metabolism	Metabolism of cofactors and vitamins	gene11455	phoD
											gene08616	phoD
1	map00051	Fructose and mannose metabolism	KEGG PATHWAY	1/ 45	21/ 4219	0.047619	0.202065	0.341956	Metabolism	Carbohydrate metabolism	gene10336	fucD
2	map00500	Starch and sucrose metabolism	KEGG PATHWAY	2/ 45	76/ 4219	0.0263158	0.193986	0.355641	Metabolism	Carbohydrate metabolism	gene02051	—
											gene08830	—
1	map04070	Phosphatidylinositol signaling system	KEGG PATHWAY	1/ 45	27/ 4219	0.037037	0.252058	0.369686	Environmental Information Processing	Signal transduction	gene05941	IHPK
1	map00400	Phenylalanine, tyrosine and tryptophan biosynthesis	KEGG PATHWAY	1/ 45	26/ 4219	0.0384615	0.243944	0.383341	Metabolism	Amino acid metabolism	gene04266	—
1	map00260	Glycine, serine and threonine metabolism	KEGG PATHWAY	1/ 45	37/ 4219	0.027027	0.328657	0.401692	Metabolism	Amino acid metabolism	gene04266	—
1	map00030	Pentose phosphate pathway	KEGG PATHWAY	1/ 45	17/ 4219	0.0588235	0.166936	0.408066	Metabolism	Carbohydrate metabolism	gene06313	gnl
1	map00860	Porphyrin metabolism	KEGG PATHWAY	1/ 45	17/ 4219	0.0588235		0.408066	Metabolism	Metabolism of cofactors and vitamins	gene09718	—
1	map00900	Terpenoid backbone biosynthesis	KEGG PATHWAY	1/ 45	17/ 4219	0.0588235		0.408066	Metabolism	Metabolism of terpenoids and polyketides	gene12460	—
1	map00350	Tyrosine metabolism	KEGG PATHWAY	1/ 45	36/ 4219	0.0277778	0.321356	0.415873	Metabolism	Amino acid metabolism	gene02817	hpaI
2	map04141	Protein processing in endoplasmic reticulum	KEGG PATHWAY	2/ 45	105/ 4219	0.0190476	0.308987	0.424857	Genetic Information Processing	Folding, sorting and degradation	gene07494	—
											gene07500	—
1	map00565	Ether lipid metabolism	KEGG PATHWAY	1/ 45	12/ 4219	0.0833333	0.120893	0.443275	Metabolism	Lipid metabolism	gene11676	PLB
1	map00592	alpha-Linolenic acid metabolism	KEGG PATHWAY	1/ 45	12/ 4219	0.0833333		0.443275	Metabolism	Lipid metabolism	gene11676	PLB
1	map00910	Nitrogen metabolism	KEGG PATHWAY	1/ 45	12/ 4219	0.0833333		0.443275	Metabolism	Energy metabolism	gene02437	cynT
1	map03420	Nucleotide excision repair	KEGG PATHWAY	1/ 45	46/ 4219	0.0217391	0.391	0.452737	Genetic Information Processing	Replication and repair	gene10657	RAD2
1	map00480	Glutathione metabolism	KEGG PATHWAY	1/ 45	54/ 4219	0.0185185	0.441638	0.485802	Metabolism	Metabolism of other amino acids	gene02360	—
1	map00053	Ascorbate and aldarate metabolism	KEGG PATHWAY	1/ 45	11/ 4219	0.0909091	0.11139	0.490118	Metabolism	Carbohydrate metabolism	gene06313	gnl
2	map00564	Glycerophospholipid metabolism	KEGG PATHWAY	2/ 45	49/ 4219	0.0408163	0.0954535	0.524994	Metabolism	Lipid metabolism	gene11676	PLB
											gene01354	—
1	map00591	Linoleic acid metabolism	KEGG PATHWAY	1/ 45	7/ 4219	0.142857	0.072365	0.530677	Metabolism	Lipid metabolism	gene11676	PLB
1	map00520	Amino sugar and nucleotide sugar metabolism	KEGG PATHWAY	1/ 45	84/ 4219	0.0119048	0.59739	0.625837	Metabolism	Carbohydrate metabolism	gene06347	—
1	map04138	Autophagy - yeast	KEGG PATHWAY	1/ 45	97/ 4219	0.0103093	0.650847	0.650847	Cellular Processes	Transport and catabolism	gene05941	IHPK
