# Supplementary material for: Transcriptomic, and metabolic profiling reveals adaptive mechanisms of Auricularia heimuer to temperature stress
Source: PeerJ. 2025 Jul 21;13:e19713. doi: 10.7717/peerj.19713 (PMC12288747; doi:10.7717/peerj.19713)
Supplement: Supplemental Information 5 [file peerj-13-19713-s005.xlsx]

## Sheet: Supplemental Table 5.1
Supplemental Table 5.1 Differential gene expression in different groups (LT_vs_NT)
Number	GO ID	Term Type	Description	Ratio_in_study	Ratio_in_pop	Rich factor	Pvalue	Padjust	Gene_ids	Gene_names
109	GO:0016491	MF	oxidoreductase activity	109/ 630	899/ 8221	0.121246	5.30189e-07	5.43113e-05	gene00096;gene00370;gene00736;gene00943;gene00949;gene01105;gene01140;gene01157;gene01505;gene01506;gene01555;gene01565;gene01666;gene01692;gene01732;gene01772;gene01845;gene02022;gene02027;gene02267;gene02272;gene02307;gene02475;gene02860;gene02890;gene02978;gene03103;gene03374;gene04013;gene04395;gene04414;gene04446;gene04458;gene04490;gene04986;gene05151;gene05165;gene05185;gene05226;gene05335…	;qor;;;;;;;;;;;;;;IFA38;;;;;;;;;;mpn;;;;;;;;;pcaC;;;;gabD;;;;;;;leuB;;;;;;;;;;;;;;;;;;;;;;gnd;;hmgA;;;;;;katE;;;;;;;;;;mpn;;;katE;;;;;;;;;;;;;;;;;;;;
51	GO:0016705	MF	oxidoreductase activity, acting on paired donors, with incorporation or reduction of molecular oxygen	51/ 630	327/ 8221	0.155963	7.08001e-07	6.62348e-05	gene00736;gene00949;gene01105;gene01140;gene01157;gene01505;gene01506;gene02027;gene02475;gene02860;gene02890;gene03103;gene03374;gene04395;gene04414;gene04458;gene05151;gene05185;gene05335;gene05337;gene05343;gene06038;gene06209;gene06635;gene06747;gene06791;gene07124;gene07449;gene07698;gene08055;gene08060;gene08257;gene08865;gene08896;gene09150;gene10103;gene10933;gene11315;gene11501;gene11654…	;;;;;;;;;;;;;;;;;;;;;;;;;;;;;;;;;;;;;;;;;;;;;;;;;;
267	GO:0016020	CC	membrane	267/ 630	2776/ 8221	0.0961816	3.17917e-06	0.000216637	gene00222;gene00232;gene00243;gene00349;gene00364;gene00370;gene00432;gene00606;gene00807;gene00831;gene00850;gene00884;gene00931;gene00937;gene00977;gene01105;gene01140;gene01244;gene01247;gene01305;gene01354;gene01430;gene01501;gene01505;gene01506;gene01555;gene01562;gene01565;gene01575;gene01595;gene01647;gene01682;gene01761;gene01766;gene01772;gene01801;gene01845;gene01929;gene02051;gene02084…	;;;;;qor;;;;;;;;;;;;;;;;;;;;;;;;;;;;;IFA38;psd;;;;;;;;;;;;;;;;;;;;;;YEA4;;;GONST1;;;;;;;;;;;;;;;manB;;;;;;;;CD243;;;PIT;;;;;;;;;;;;gabD;;;;;;;;;;;;;;;;;;;;ZIP1_2_3;;;;;;;;;;;;;;;;;;;;;;;;;;;;;;truA;;;;;;;;;;;;;;;;;;;;;;;;;;;;;;;;;YDC1;;;;;;;;;;katE;;;;;;;;;;;;;;;;;;;;;;;BZRP;;;;;;;;;;;;;;;;;;;;;;;;;;;ZIP7;;;;;;;;;;;;;;;;;;;;;;;;;
33	GO:0004497	MF	monooxygenase activity	33/ 630	205/ 8221	0.160976	4.35065e-05	0.00285228	gene00736;gene00949;gene01157;gene01505;gene01506;gene02027;gene02475;gene02860;gene02890;gene03374;gene04395;gene04414;gene05151;gene05185;gene05335;gene05343;gene06209;gene06747;gene06791;gene07124;gene07698;gene08896;gene10103;gene10933;gene12078;gene12897;gene13006;gene13090;gene13146;gene13686;gene13697;gene13711;gene14074	;;;;;;;;;;;;;;;;;;;;;;;;;;;;;;;;
27	GO:0140907	MF	flavin-dependent halogenase activity	27/ 630	164/ 8221	0.164634	0.00014105	0.00797177	gene00949;gene01105;gene01140;gene01157;gene02890;gene03103;gene04395;gene04458;gene05337;gene06038;gene06209;gene06635;gene07449;gene08055;gene08060;gene08257;gene08865;gene08896;gene09150;gene10933;gene11315;gene11501;gene11654;gene12085;gene12897;gene12899;gene13090	;;;;;;;;;;;;;;;;;;;;;;;;;;
27	GO:0140906	MF	halogenase activity	27/ 630	164/ 8221	0.164634	0.00014105	0.00797177	gene00949;gene01105;gene01140;gene01157;gene02890;gene03103;gene04395;gene04458;gene05337;gene06038;gene06209;gene06635;gene07449;gene08055;gene08060;gene08257;gene08865;gene08896;gene09150;gene10933;gene11315;gene11501;gene11654;gene12085;gene12897;gene12899;gene13090	;;;;;;;;;;;;;;;;;;;;;;;;;;
26	GO:0016829	MF	lyase activity	26/ 630	162/ 8221	0.160494	0.000263021	0.0134716	gene01448;gene01609;gene01610;gene01801;gene02084;gene02437;gene03583;gene04266;gene04455;gene04509;gene04771;gene05622;gene05812;gene06209;gene08883;gene08992;gene09658;gene09742;gene09884;gene10103;gene10336;gene11013;gene12495;gene13075;gene13260;gene13444	;ilvD;ilvD;psd;;cynT;;;fucD;;pdc;;pel;;;;;;;;fucD;eno;;;;
30	GO:0046906	MF	tetrapyrrole binding	30/ 630	199/ 8221	0.150754	0.000347312	0.0167425	gene00096;gene01505;gene01506;gene02027;gene02475;gene02860;gene02978;gene03374;gene04013;gene04414;gene05151;gene05185;gene05335;gene05343;gene06526;gene06747;gene06791;gene07124;gene07698;gene08168;gene09836;gene10103;gene10132;gene12078;gene13006;gene13146;gene13686;gene13697;gene13711;gene14074	;;;;;;mpn;;;;;;;;;;;;;katE;mpn;;katE;;;;;;;
30	GO:0020037	MF	heme binding	30/ 630	199/ 8221	0.150754	0.000347312	0.0167425	gene00096;gene01505;gene01506;gene02027;gene02475;gene02860;gene02978;gene03374;gene04013;gene04414;gene05151;gene05185;gene05335;gene05343;gene06526;gene06747;gene06791;gene07124;gene07698;gene08168;gene09836;gene10103;gene10132;gene12078;gene13006;gene13146;gene13686;gene13697;gene13711;gene14074	;;;;;;mpn;;;;;;;;;;;;;katE;mpn;;katE;;;;;;;
8	GO:0005615	CC	extracellular space	8/ 630	25/ 8221	0.32	0.000380691	0.0226987	gene04083;gene05571;gene06383;gene10252;gene10266;gene10267;gene10277;gene11609	CLN2;;CLN2;CLN2;CLN2;CLN2;CLN2;CLN2
8	GO:0008171	MF	O-methyltransferase activity	8/ 630	30/ 8221	0.266667	0.00146295	0.0570899	gene00475;gene01861;gene03726;gene03783;gene09744;gene10284;gene10834;gene11045	;;;;;;;
4	GO:0070002	MF	glutamic-type peptidase activity	4/ 630	8/ 8221	0.5	0.00186269	0.0663684	gene06577;gene09446;gene10873;gene10884	;;;
4	GO:0070007	MF	glutamic-type endopeptidase activity	4/ 630	8/ 8221	0.5	0.00186269	0.0663684	gene06577;gene09446;gene10873;gene10884	;;;
4	GO:0016801	MF	hydrolase activity, acting on ether bonds	4/ 630	8/ 8221	0.5	0.00186269	0.0663684	gene03270;gene04117;gene04126;gene08808	;;;
4	GO:0016803	MF	ether hydrolase activity	4/ 630	8/ 8221	0.5	0.00186269	0.0663684	gene03270;gene04117;gene04126;gene08808	;;;
10	GO:0016835	MF	carbon-oxygen lyase activity	10/ 630	47/ 8221	0.212766	0.00250816	0.0874656	gene01609;gene01610;gene02437;gene04266;gene04455;gene05812;gene08883;gene08992;gene10336;gene11013	ilvD;ilvD;cynT;;fucD;pel;;;fucD;eno
9	GO:0016836	MF	hydro-lyase activity	9/ 630	40/ 8221	0.225	0.0027238	0.0930063	gene01609;gene01610;gene02437;gene04266;gene04455;gene08883;gene08992;gene10336;gene11013	ilvD;ilvD;cynT;;fucD;;;fucD;eno
13	GO:0071949	MF	FAD binding	13/ 630	74/ 8221	0.175676	0.00372754	0.122189	gene00949;gene01105;gene04491;gene05352;gene06164;gene06209;gene06635;gene07211;gene08166;gene11654;gene12208;gene12897;gene12899	;;;;;;;;;;;;
23	GO:0050660	MF	flavin adenine dinucleotide binding	23/ 630	161/ 8221	0.142857	0.00382212	0.122832	gene00949;gene01105;gene01157;gene02267;gene03103;gene04395;gene04491;gene05337;gene05352;gene06038;gene06164;gene06209;gene06635;gene07211;gene08166;gene10933;gene11501;gene11654;gene12085;gene12208;gene12897;gene12899;gene13090	;;;;;;;;;;;;;;;;;;;;;;
5	GO:0016485	BP	protein processing	5/ 630	12/ 8221	0.416667	0.00130763	0.129666	gene01140;gene01801;gene02687;gene08674;gene12460	;psd;SPC3;;
23	GO:0005506	MF	iron ion binding	23/ 630	163/ 8221	0.141104	0.00412927	0.130151	gene01505;gene01506;gene02027;gene02475;gene02860;gene03374;gene04414;gene05151;gene05185;gene05335;gene05343;gene06747;gene06791;gene07124;gene07698;gene10103;gene12078;gene13006;gene13146;gene13686;gene13697;gene13711;gene14074	;;;;;;;;;;;;;;;;;;;;;;
11	GO:0004252	MF	serine-type endopeptidase activity	11/ 630	60/ 8221	0.183333	0.00528795	0.160499	gene01140;gene04083;gene05445;gene06383;gene06708;gene06975;gene10252;gene10266;gene10267;gene10277;gene11609	;CLN2;;CLN2;;;CLN2;CLN2;CLN2;CLN2;CLN2
2	GO:0050023	MF	L-fuconate dehydratase activity	2/ 630	2/ 8221	1	0.00586401	0.174748	gene04455;gene10336	fucD;fucD
13	GO:0016209	MF	antioxidant activity	13/ 630	75/ 8221	0.173333	0.0066616	0.181973	gene00096;gene01845;gene02978;gene04013;gene04986;gene05444;gene06526;gene06854;gene06905;gene08168;gene09836;gene10132;gene12351	;;mpn;;pcaC;;;;;katE;mpn;katE;
25	GO:0004175	MF	endopeptidase activity	25/ 630	192/ 8221	0.130208	0.00842806	0.219108	gene01140;gene04083;gene04794;gene05445;gene05571;gene06335;gene06383;gene06577;gene06708;gene06779;gene06975;gene08910;gene09446;gene10252;gene10266;gene10267;gene10277;gene10873;gene10884;gene11167;gene11609;gene11832;gene12460;gene13218;gene13219	;CLN2;;;;;CLN2;;;;;;;CLN2;CLN2;CLN2;CLN2;;;;CLN2;;;;
11	GO:0004601	MF	peroxidase activity	11/ 630	64/ 8221	0.171875	0.00868944	0.219108	gene00096;gene01845;gene02978;gene04013;gene04986;gene05444;gene06526;gene06905;gene08168;gene09836;gene10132	;;mpn;;pcaC;;;;katE;mpn;katE
11	GO:0016684	MF	oxidoreductase activity, acting on peroxide as acceptor	11/ 630	64/ 8221	0.171875	0.00868944	0.219108	gene00096;gene01845;gene02978;gene04013;gene04986;gene05444;gene06526;gene06905;gene08168;gene09836;gene10132	;;mpn;;pcaC;;;;katE;mpn;katE
3	GO:0006465	BP	signal peptide processing	3/ 630	5/ 8221	0.6	0.00398344	0.277876	gene01140;gene02687;gene08674	;SPC3;
5	GO:0051604	BP	protein maturation	5/ 630	15/ 8221	0.333333	0.00408645	0.277876	gene01140;gene01801;gene02687;gene08674;gene12460	;psd;SPC3;;
4	GO:1901661	BP	quinone metabolic process	4/ 630	10/ 8221	0.4	0.00493537	0.277876	gene00736;gene07452;gene11520;gene13003	;;;
4	GO:0006744	BP	ubiquinone biosynthetic process	4/ 630	10/ 8221	0.4	0.00493537	0.277876	gene00736;gene07452;gene11520;gene13003	;;;
4	GO:0006743	BP	ubiquinone metabolic process	4/ 630	10/ 8221	0.4	0.00493537	0.277876	gene00736;gene07452;gene11520;gene13003	;;;
4	GO:1901663	BP	quinone biosynthetic process	4/ 630	10/ 8221	0.4	0.00493537	0.277876	gene00736;gene07452;gene11520;gene13003	;;;
4	GO:0042181	BP	ketone biosynthetic process	4/ 630	10/ 8221	0.4	0.00493537	0.277876	gene00736;gene07452;gene11520;gene13003	;;;
3	GO:0008312	MF	7S RNA binding	3/ 630	7/ 8221	0.428571	0.0124071	0.290504	gene02063;gene05447;gene11777	;;
8	GO:0016830	MF	carbon-carbon lyase activity	8/ 630	42/ 8221	0.190476	0.0130777	0.301892	gene01448;gene01801;gene03583;gene04771;gene06209;gene09884;gene13260;gene13444	;psd;;pdc;;;;
2	GO:0070072	BP	vacuolar proton-transporting V-type ATPase complex assembly	2/ 630	2/ 8221	1	0.00586401	0.311295	gene03501;gene04139	;
2	GO:0070070	BP	proton-transporting V-type ATPase complex assembly	2/ 630	2/ 8221	1	0.00586401	0.311295	gene03501;gene04139	;
2	GO:0004160	MF	dihydroxy-acid dehydratase activity	2/ 630	3/ 8221	0.666667	0.0166959	0.350828	gene01609;gene01610	ilvD;ilvD
2	GO:0016721	MF	oxidoreductase activity, acting on superoxide radicals as acceptor	2/ 630	3/ 8221	0.666667	0.0166959	0.350828	gene06854;gene12351	;
2	GO:0032574	MF	5'-3' RNA helicase activity	2/ 630	3/ 8221	0.666667	0.0166959	0.350828	gene05178;gene09380	;
2	GO:0004784	MF	superoxide dismutase activity	2/ 630	3/ 8221	0.666667	0.0166959	0.350828	gene06854;gene12351	;
3	GO:0072593	BP	reactive oxygen species metabolic process	3/ 630	6/ 8221	0.5	0.00751463	0.387838	gene06854;gene08168;gene10132	;katE;katE
3	GO:0051920	MF	peroxiredoxin activity	3/ 630	8/ 8221	0.375	0.0187338	0.388667	gene04986;gene05444;gene06905	pcaC;;
3	GO:0048500	CC	signal recognition particle	3/ 630	7/ 8221	0.428571	0.0124071	0.455247	gene02063;gene05447;gene11777	;;
3	GO:0006613	BP	cotranslational protein targeting to membrane	3/ 630	7/ 8221	0.428571	0.0124071	0.512277	gene02063;gene05447;gene11777	;;
3	GO:0006614	BP	SRP-dependent cotranslational protein targeting to membrane	3/ 630	7/ 8221	0.428571	0.0124071	0.512277	gene02063;gene05447;gene11777	;;
2	GO:0005787	CC	signal peptidase complex	2/ 630	3/ 8221	0.666667	0.0166959	0.568854	gene02687;gene08674	SPC3;
2	GO:0000978	MF	RNA polymerase II cis-regulatory region sequence-specific DNA binding	2/ 630	4/ 8221	0.5	0.0317021	0.570987	gene02778;gene05365	;
2	GO:0005315	MF	inorganic phosphate transmembrane transporter activity	2/ 630	4/ 8221	0.5	0.0317021	0.570987	gene00606;gene04546	;PIT
2	GO:0047293	MF	4-hydroxybenzoate nonaprenyltransferase activity	2/ 630	4/ 8221	0.5	0.0317021	0.570987	gene11520;gene13003	;
2	GO:0008412	MF	4-hydroxybenzoate octaprenyltransferase activity	2/ 630	4/ 8221	0.5	0.0317021	0.570987	gene11520;gene13003	;
2	GO:0002094	MF	polyprenyltransferase activity	2/ 630	4/ 8221	0.5	0.0317021	0.570987	gene11520;gene13003	;
2	GO:0002083	MF	4-hydroxybenzoate decaprenyltransferase activity	2/ 630	4/ 8221	0.5	0.0317021	0.570987	gene11520;gene13003	;
2	GO:0009820	BP	alkaloid metabolic process	2/ 630	3/ 8221	0.666667	0.0166959	0.633082	gene01721;gene10932	;
6	GO:0006541	BP	glutamine metabolic process	6/ 630	29/ 8221	0.206897	0.0205368	0.748182	gene05572;gene08632;gene08633;gene08639;gene10049;gene10686	glnA;;;;;
3	GO:0072599	BP	establishment of protein localization to endoplasmic reticulum	3/ 630	9/ 8221	0.333333	0.0265254	0.878868	gene02063;gene05447;gene11777	;;
3	GO:0006612	BP	protein targeting to membrane	3/ 630	9/ 8221	0.333333	0.0265254	0.878868	gene02063;gene05447;gene11777	;;
3	GO:0045047	BP	protein targeting to ER	3/ 630	9/ 8221	0.333333	0.0265254	0.878868	gene02063;gene05447;gene11777	;;
44	GO:0005975	BP	carbohydrate metabolic process	44/ 630	414/ 8221	0.10628	0.0285529	0.892463	gene00389;gene00738;gene00831;gene01141;gene01261;gene01543;gene01844;gene02084;gene02203;gene02804;gene02854;gene03660;gene03715;gene03833;gene04178;gene04455;gene04767;gene05263;gene05432;gene05812;gene06347;gene06365;gene06534;gene07563;gene07880;gene07894;gene08528;gene08592;gene08830;gene09000;gene09198;gene10011;gene10151;gene10336;gene10839;gene11013;gene11270;gene11300;gene11389;gene11440…	;;;;;;abfA;;bglX;;nagB;;;;manB;fucD;;;abnA;pel;;malZ;;gnd;;bglX;;;;;;;xynA;fucD;;eno;;;galM;;;;;
4	GO:0090150	BP	establishment of protein localization to membrane	4/ 630	16/ 8221	0.25	0.0295987	0.892463	gene02063;gene02762;gene05447;gene11777	;;;
2	GO:0006817	BP	phosphate ion transport	2/ 630	4/ 8221	0.5	0.0317021	0.892463	gene00606;gene04546	;PIT
2	GO:0070071	BP	proton-transporting two-sector ATPase complex assembly	2/ 630	4/ 8221	0.5	0.0317021	0.892463	gene03501;gene04139	;
2	GO:0042743	BP	hydrogen peroxide metabolic process	2/ 630	4/ 8221	0.5	0.0317021	0.892463	gene08168;gene10132	katE;katE
2	GO:0042744	BP	hydrogen peroxide catabolic process	2/ 630	4/ 8221	0.5	0.0317021	0.892463	gene08168;gene10132	katE;katE
17	GO:0032259	BP	methylation	17/ 630	134/ 8221	0.126866	0.0332271	0.907882	gene00243;gene00475;gene01354;gene01861;gene03726;gene03783;gene06417;gene07452;gene08304;gene08893;gene09286;gene09744;gene10284;gene10834;gene10928;gene11045;gene12113	;;;;;;;;;;;;;;;;
2	GO:0005786	CC	signal recognition particle, endoplasmic reticulum targeting	2/ 630	4/ 8221	0.5	0.0317021	0.94512	gene05447;gene11777	;
4	GO:0072657	BP	protein localization to membrane	4/ 630	18/ 8221	0.222222	0.0440853	1	gene02063;gene02762;gene05447;gene11777	;;;
3	GO:0070972	BP	protein localization to endoplasmic reticulum	3/ 630	11/ 8221	0.272727	0.0464611	1	gene02063;gene05447;gene11777	;;
5	GO:0030659	CC	cytoplasmic vesicle membrane	5/ 630	26/ 8221	0.192308	0.0445541	1	gene01801;gene03460;gene04139;gene07273;gene09166	psd;GONST1;;;
5	GO:0012506	CC	vesicle membrane	5/ 630	26/ 8221	0.192308	0.0445541	1	gene01801;gene03460;gene04139;gene07273;gene09166	psd;GONST1;;;

## Sheet: Supplemental Table 5.2
Supplemental Table 5.2 Differential gene expression in different groups (HT_vs_NT)
Number	GO ID	Term Type	Description	Ratio_in_study	Ratio_in_pop	Rich factor	Pvalue	Padjust	Gene_ids	Gene_names
114	GO:0016491	MF	oxidoreductase activity	114/ 482	899/ 8221	0.126808	2.29037e-16	1.87696e-13	gene00066;gene00096;gene00590;gene00704;gene00943;gene00949;gene00971;gene00972;gene01140;gene01450;gene01506;gene01697;gene02022;gene02083;gene02112;gene02267;gene02438;gene02475;gene02890;gene02978;gene02981;gene02993;gene03015;gene03104;gene03127;gene03149;gene03241;gene03725;gene04013;gene04099;gene04100;gene04414;gene04458;gene04796;gene04977;gene04978;gene05190;gene05307;gene05343;gene05352…	;;;;;;;;;;;;;;adhP;;;;;mpn;;;;;;;;;;;;;;;;;gabD;;;;;;;;;;;;;;;;;INDO;;;;;;;;;;;;;mpn;;;;;;;;;;;katE;katE;;;;;;IFA38;;;mpn;;;;;;;;;;;;;;mpn;;;;;;;;;;;;
54	GO:0016705	MF	oxidoreductase activity, acting on paired donors, with incorporation or reduction of molecular oxygen	54/ 482	327/ 8221	0.165138	1.87533e-12	8.01959e-10	gene00949;gene01140;gene01450;gene01506;gene02438;gene02475;gene02890;gene02981;gene03015;gene03127;gene03241;gene03725;gene04414;gene04458;gene04977;gene04978;gene05343;gene05956;gene06333;gene06747;gene06901;gene07119;gene07124;gene07353;gene07449;gene07649;gene07807;gene07955;gene08060;gene08862;gene08902;gene09095;gene09422;gene09854;gene10103;gene11482;gene11489;gene11492;gene11494;gene11526…	;;;;;;;;;;;;;;;;;;;;;;;;;;;;;;;;;;;;;;;;;;;;;;;;;;;;;
41	GO:0004497	MF	monooxygenase activity	41/ 482	205/ 8221	0.2	1.95719e-12	8.01959e-10	gene00949;gene01506;gene02438;gene02475;gene02890;gene03127;gene03241;gene04414;gene04977;gene04978;gene05343;gene05956;gene06333;gene06747;gene06901;gene07119;gene07124;gene07353;gene07649;gene07955;gene08902;gene09095;gene09422;gene09854;gene10103;gene11482;gene11489;gene11492;gene11494;gene11956;gene12017;gene12077;gene12089;gene12356;gene12843;gene12894;gene12897;gene13146;gene13686;gene13710…	;;;;;;;;;;;;;;;;;;;;;;;;;;;;;;;;;;;;;;;;
34	GO:0020037	MF	heme binding	34/ 482	199/ 8221	0.170854	1.21517e-08	1.53204e-06	gene00096;gene01506;gene02475;gene02978;gene03127;gene04013;gene04414;gene05343;gene06333;gene06747;gene07016;gene07119;gene07124;gene08153;gene08506;gene08902;gene09095;gene09422;gene10103;gene10129;gene10132;gene11422;gene11482;gene11489;gene11492;gene11494;gene12017;gene12077;gene12089;gene12322;gene13146;gene13686;gene13710;gene13711	;;;mpn;;;;;;;INDO;;;;mpn;;;;;katE;katE;mpn;;;;;;;;mpn;;;;
34	GO:0046906	MF	tetrapyrrole binding	34/ 482	199/ 8221	0.170854	1.21517e-08	1.53204e-06	gene00096;gene01506;gene02475;gene02978;gene03127;gene04013;gene04414;gene05343;gene06333;gene06747;gene07016;gene07119;gene07124;gene08153;gene08506;gene08902;gene09095;gene09422;gene10103;gene10129;gene10132;gene11422;gene11482;gene11489;gene11492;gene11494;gene12017;gene12077;gene12089;gene12322;gene13146;gene13686;gene13710;gene13711	;;;mpn;;;;;;;INDO;;;;mpn;;;;;katE;katE;mpn;;;;;;;;mpn;;;;
17	GO:0071949	MF	FAD binding	17/ 482	74/ 8221	0.22973	8.77576e-07	7.19174e-05	gene00949;gene02083;gene02981;gene03725;gene05307;gene05352;gene05956;gene06901;gene08166;gene09854;gene11956;gene12154;gene12208;gene12356;gene12843;gene12894;gene12897	;;;;;;;;;;;;;;;;
315	GO:0003824	MF	catalytic activity	315/ 482	4496/ 8221	0.0700623	1.10522e-06	8.62601e-05	gene00018;gene00021;gene00045;gene00066;gene00094;gene00096;gene00222;gene00239;gene00254;gene00389;gene00523;gene00590;gene00690;gene00704;gene00820;gene00943;gene00949;gene00971;gene00972;gene00986;gene01061;gene01140;gene01141;gene01151;gene01354;gene01450;gene01506;gene01635;gene01697;gene01782;gene01793;gene01800;gene01862;gene01865;gene01868;gene01909;gene01940;gene01982;gene02022;gene02046…	bglX;xynA;;;;;;;;;htpG;;;;;;;;;;;;;;;;;;;;;;;;htpG;PLB;;;;abfA;;;;;adhP;;;cynT;;;;;;;hpaI;;;mpn;;;;;;;;;;;;;;;;;;;;;;;;CLN2;;manB;;;;;;;;;;;;;;;;;;gabD;;;;;;;;;;;;;pip;IHPK;;;;;;;;;;gnl;;;;;;;;;;;xynA;;;;;;;;;;INDO;;;;;;;;truA;;;;;;;;;;;;bglX;;;;;;;;;;;;;;;mpn;;;;;;;;;;;gst;;;;;xfp;ackA;;;;;;;;;;;;;;;;;;;;;;katE;katE;;xynA;CLN2;CLN2;CLN2;CLN2;;fucD;;CLN2;RAD2;;;;;;;;;;IFA38;;;;;;;mpn;;;;;;;;;;;;P…
50	GO:0005975	BP	carbohydrate metabolic process	50/ 482	414/ 8221	0.120773	8.0703e-07	9.99641e-05	gene00018;gene00021;gene00389;gene01141;gene01964;gene01982;gene02046;gene02084;gene03184;gene03660;gene03792;gene04178;gene04497;gene04575;gene04584;gene05174;gene05263;gene05446;gene05944;gene06282;gene06347;gene06733;gene06859;gene06991;gene07076;gene07085;gene07257;gene07894;gene08117;gene08133;gene08528;gene08830;gene08902;gene09000;gene09288;gene09513;gene10151;gene10336;gene10676;gene11056…	bglX;xynA;;;;;abfA;;;;;manB;;;;;;;;;;xynA;;;;;;bglX;;;;;;;xfp;;xynA;fucD;;;;;;;;manB;sacA;aceB;;abnA
26	GO:0005506	MF	iron ion binding	26/ 482	163/ 8221	0.159509	2.54006e-06	0.000160122	gene01506;gene02475;gene03127;gene04414;gene05343;gene06333;gene06747;gene07119;gene07124;gene08902;gene09095;gene09422;gene10103;gene11482;gene11489;gene11492;gene11494;gene11526;gene11780;gene12017;gene12077;gene12089;gene13146;gene13686;gene13710;gene13711	;;;;;;;;;;;;;;;;;;;;;;;;;
24	GO:0005576	CC	extracellular region	24/ 482	143/ 8221	0.167832	2.47322e-06	0.000168532	gene00021;gene00096;gene01964;gene01981;gene04178;gene05156;gene05318;gene05446;gene07076;gene07085;gene07187;gene08117;gene08133;gene08902;gene09000;gene09718;gene09997;gene10938;gene11440;gene11642;gene11670;gene11712;gene11857;gene13686	xynA;;;;manB;;;;;;;;;;;;;;;;;;manB;
19	GO:0017171	MF	serine hydrolase activity	19/ 482	101/ 8221	0.188119	5.01954e-06	0.000293822	gene01140;gene01782;gene03135;gene04109;gene04680;gene04726;gene05417;gene05445;gene06120;gene07711;gene08512;gene09151;gene10114;gene10252;gene10266;gene10267;gene10274;gene10398;gene10717	;;;CLN2;;;;;;;;;;CLN2;CLN2;CLN2;CLN2;CLN2;
19	GO:0008236	MF	serine-type peptidase activity	19/ 482	101/ 8221	0.188119	5.01954e-06	0.000293822	gene01140;gene01782;gene03135;gene04109;gene04680;gene04726;gene05417;gene05445;gene06120;gene07711;gene08512;gene09151;gene10114;gene10252;gene10266;gene10267;gene10274;gene10398;gene10717	;;;CLN2;;;;;;;;;;CLN2;CLN2;CLN2;CLN2;CLN2;
25	GO:0050660	MF	flavin adenine dinucleotide binding	25/ 482	161/ 8221	0.15528	6.49291e-06	0.000354729	gene00949;gene02083;gene02267;gene02438;gene02981;gene03015;gene03241;gene03725;gene05307;gene05352;gene05956;gene06901;gene07353;gene07649;gene07955;gene08166;gene09854;gene11956;gene12154;gene12208;gene12356;gene12843;gene12894;gene12897;gene13007	;;;;;;;;;;;;;;;;;;;;;;;;
25	GO:0140907	MF	flavin-dependent halogenase activity	25/ 482	164/ 8221	0.152439	9.06929e-06	0.000464518	gene00949;gene01140;gene01450;gene02438;gene02890;gene02981;gene03015;gene03241;gene03725;gene04458;gene05956;gene06901;gene07353;gene07449;gene07649;gene07807;gene08060;gene08862;gene09854;gene11956;gene12356;gene12843;gene12894;gene12897;gene13007	;;;;;;;;;;;;;;;;;;;;;;;;
25	GO:0140906	MF	halogenase activity	25/ 482	164/ 8221	0.152439	9.06929e-06	0.000464518	gene00949;gene01140;gene01450;gene02438;gene02890;gene02981;gene03015;gene03241;gene03725;gene04458;gene05956;gene06901;gene07353;gene07449;gene07649;gene07807;gene08060;gene08862;gene09854;gene11956;gene12356;gene12843;gene12894;gene12897;gene13007	;;;;;;;;;;;;;;;;;;;;;;;;
39	GO:0016798	MF	hydrolase activity, acting on glycosyl bonds	39/ 482	323/ 8221	0.120743	1.54495e-05	0.000744755	gene00018;gene00021;gene00094;gene01141;gene01982;gene02046;gene02051;gene03184;gene03792;gene04178;gene04497;gene04575;gene04584;gene05174;gene05263;gene05446;gene05944;gene06250;gene06347;gene06733;gene06787;gene06991;gene07085;gene07257;gene07894;gene08117;gene08133;gene08528;gene09312;gene10151;gene11056;gene11300;gene11479;gene11670;gene11712;gene11857;gene12211;gene12212;gene13708	bglX;xynA;;;;abfA;;;;manB;;;;;;;;;;xynA;;;;;bglX;;;;;xynA;;;;;;manB;;sacA;abnA
35	GO:0004553	MF	hydrolase activity, hydrolyzing O-glycosyl compounds	35/ 482	282/ 8221	0.124113	2.35344e-05	0.00110208	gene00018;gene00021;gene01141;gene01982;gene02046;gene02051;gene03184;gene04178;gene04497;gene04575;gene04584;gene05174;gene05263;gene05446;gene05944;gene06250;gene06347;gene06733;gene06787;gene06991;gene07085;gene07257;gene07894;gene08117;gene08133;gene09312;gene10151;gene11056;gene11479;gene11670;gene11712;gene11857;gene12211;gene12212;gene13708	bglX;xynA;;;abfA;;;manB;;;;;;;;;;xynA;;;;;bglX;;;;xynA;;;;;manB;;sacA;abnA
21	GO:0000272	BP	polysaccharide catabolic process	21/ 482	126/ 8221	0.166667	1.17671e-05	0.00121463	gene00018;gene00021;gene01982;gene02046;gene03660;gene04497;gene04584;gene05174;gene06347;gene06733;gene06859;gene06991;gene07076;gene08117;gene08133;gene10151;gene11056;gene11479;gene11670;gene11712;gene13708	bglX;xynA;;abfA;;;;;;xynA;;;;;;xynA;;;;;abnA
206	GO:0016020	CC	membrane	206/ 482	2776/ 8221	0.0742075	2.37101e-05	0.00141371	gene00066;gene00222;gene00261;gene00269;gene00349;gene00364;gene00518;gene00606;gene01140;gene01354;gene01453;gene01506;gene01595;gene01686;gene01782;gene01787;gene01940;gene01981;gene01982;gene02051;gene02083;gene02084;gene02102;gene02215;gene02284;gene02475;gene02746;gene02747;gene02791;gene03011;gene03127;gene03135;gene03149;gene03184;gene03341;gene03418;gene03446;gene03660;gene03805;gene03868…	;;;;;;;;;;;;;;;;;;;;;;;;;;;;;;;;;;;;;;;;;;;manB;;;PIT;;;;;;;;;;;;;;;;;;;;;;;;;;;;;;;;amt;;;;;;;;;;;;;;truA;;;;;;;;;;;chaA;;;;;;;;;;;;;;;;;;;;;;;;;;;;;;;katE;;;gst;;;;;;;;;;;;;;;IFA38;;;;;;;;;;;;;BZRP;;;;;;;;;;;;;;;;;;;;;;;;;;;;;;;;;;;;;;;;
21	GO:0005976	BP	polysaccharide metabolic process	21/ 482	133/ 8221	0.157895	2.75125e-05	0.0024342	gene00018;gene00021;gene01982;gene02046;gene03660;gene04497;gene04584;gene05174;gene06347;gene06733;gene06859;gene06991;gene07076;gene08117;gene08133;gene10151;gene11056;gene11479;gene11670;gene11712;gene13708	bglX;xynA;;abfA;;;;;;xynA;;;;;;xynA;;;;;abnA
22	GO:0016052	BP	carbohydrate catabolic process	22/ 482	146/ 8221	0.150685	3.74719e-05	0.00316467	gene00018;gene00021;gene01982;gene02046;gene03660;gene04497;gene04584;gene05174;gene06347;gene06733;gene06859;gene06991;gene07076;gene08117;gene08133;gene10151;gene10336;gene11056;gene11479;gene11670;gene11712;gene13708	bglX;xynA;;abfA;;;;;;xynA;;;;;;xynA;fucD;;;;;abnA
12	GO:0004252	MF	serine-type endopeptidase activity	12/ 482	60/ 8221	0.2	0.000152116	0.00639278	gene01140;gene01782;gene04109;gene05417;gene05445;gene06120;gene10252;gene10266;gene10267;gene10274;gene10398;gene10717	;;CLN2;;;;CLN2;CLN2;CLN2;CLN2;CLN2;
8	GO:0008171	MF	O-methyltransferase activity	8/ 482	30/ 8221	0.266667	0.000244685	0.010026	gene01151;gene01862;gene01865;gene03630;gene03726;gene06920;gene07023;gene12189	;;;;;;;
7	GO:0005615	CC	extracellular space	7/ 482	25/ 8221	0.28	0.000434207	0.0172597	gene04109;gene05571;gene10252;gene10266;gene10267;gene10274;gene10398	CLN2;;CLN2;CLN2;CLN2;CLN2;CLN2
5	GO:0004650	MF	polygalacturonase activity	5/ 482	13/ 8221	0.384615	0.000589166	0.0219464	gene02051;gene04575;gene06250;gene07085;gene11056	;;;;
7	GO:0070008	MF	serine-type exopeptidase activity	7/ 482	27/ 8221	0.259259	0.00072418	0.0263762	gene03135;gene04680;gene04726;gene07711;gene08512;gene09151;gene10114	;;;;;;
11	GO:0016684	MF	oxidoreductase activity, acting on peroxide as acceptor	11/ 482	64/ 8221	0.171875	0.00109979	0.0367869	gene00096;gene00704;gene02978;gene04013;gene08153;gene08506;gene10129;gene10132;gene11161;gene11422;gene12322	;;mpn;;;mpn;katE;katE;;mpn;mpn
11	GO:0004601	MF	peroxidase activity	11/ 482	64/ 8221	0.171875	0.00109979	0.0367869	gene00096;gene00704;gene02978;gene04013;gene08153;gene08506;gene10129;gene10132;gene11161;gene11422;gene12322	;;mpn;;;mpn;katE;katE;;mpn;mpn
7	GO:0004180	MF	carboxypeptidase activity	7/ 482	30/ 8221	0.233333	0.00142464	0.0449035	gene03135;gene04680;gene04726;gene07711;gene08512;gene09151;gene10114	;;;;;;
9	GO:0006979	BP	response to oxidative stress	9/ 482	44/ 8221	0.204545	0.000852906	0.0517641	gene02978;gene04013;gene08153;gene08506;gene10129;gene10132;gene11422;gene12322;gene12473	mpn;;;mpn;katE;katE;mpn;mpn;aceB
6	GO:0004185	MF	serine-type carboxypeptidase activity	6/ 482	25/ 8221	0.24	0.00267855	0.0756922	gene03135;gene04680;gene04726;gene08512;gene09151;gene10114	;;;;;
6	GO:0044550	BP	secondary metabolite biosynthetic process	6/ 482	23/ 8221	0.26087	0.0016872	0.0949942	gene04977;gene04978;gene07023;gene07807;gene08535;gene13612	;;;;;
6	GO:0016628	MF	oxidoreductase activity, acting on the CH-CH group of donors, NAD or NADP as acceptor	6/ 482	27/ 8221	0.222222	0.00405235	0.107141	gene00971;gene00972;gene06089;gene06553;gene06555;gene12208	;;;;;
11	GO:0016209	MF	antioxidant activity	11/ 482	75/ 8221	0.146667	0.00405292	0.107141	gene00096;gene00704;gene02978;gene04013;gene08153;gene08506;gene10129;gene10132;gene11161;gene11422;gene12322	;;mpn;;;mpn;katE;katE;;mpn;mpn
10	GO:0008238	MF	exopeptidase activity	10/ 482	65/ 8221	0.153846	0.00425297	0.110017	gene02962;gene03135;gene04680;gene04726;gene05933;gene07711;gene08512;gene09151;gene10114;gene12927	;;;;pip;;;;;
21	GO:0004175	MF	endopeptidase activity	21/ 482	192/ 8221	0.109375	0.00484982	0.12229	gene01140;gene01782;gene04109;gene04213;gene05417;gene05445;gene05571;gene06120;gene07187;gene08392;gene08910;gene10252;gene10266;gene10267;gene10274;gene10398;gene10717;gene12460;gene13218;gene13219;gene13560	;;CLN2;;;;;;;;;CLN2;CLN2;CLN2;CLN2;CLN2;;;;;
3	GO:0031176	MF	endo-1,4-beta-xylanase activity	3/ 482	7/ 8221	0.428571	0.00586934	0.14358	gene00021;gene06733;gene10151	xynA;xynA;xynA
26	GO:0009057	BP	macromolecule catabolic process	26/ 482	246/ 8221	0.105691	0.00336687	0.144873	gene00018;gene00021;gene01188;gene01189;gene01982;gene02046;gene03660;gene04497;gene04584;gene05174;gene06347;gene06733;gene06787;gene06859;gene06991;gene07076;gene08117;gene08133;gene10151;gene11056;gene11437;gene11479;gene11670;gene11712;gene13708;gene14020	bglX;xynA;;;;abfA;;;;;;xynA;;;;;;;xynA;;;;;;abnA;
34	GO:1901575	BP	organic substance catabolic process	34/ 482	350/ 8221	0.0971429	0.00338738	0.144873	gene00018;gene00021;gene00690;gene01188;gene01189;gene01982;gene02046;gene03660;gene04497;gene04584;gene05174;gene05190;gene06347;gene06733;gene06787;gene06859;gene06991;gene07016;gene07076;gene08117;gene08133;gene10103;gene10129;gene10132;gene10151;gene10336;gene11056;gene11437;gene11479;gene11670;gene11712;gene11784;gene13708;gene14020	bglX;xynA;;;;;abfA;;;;;gabD;;xynA;;;;INDO;;;;;katE;katE;xynA;fucD;;;;;;;abnA;
2	GO:0007154	BP	cell communication	2/ 482	2/ 8221	1	0.0034308	0.144873	gene02084;gene04213	;
7	GO:0045229	BP	external encapsulating structure organization	7/ 482	35/ 8221	0.2	0.00365023	0.147437	gene03660;gene04575;gene06859;gene07076;gene07085;gene11056;gene11479	;;;;;;
7	GO:0071555	BP	cell wall organization	7/ 482	35/ 8221	0.2	0.00365023	0.147437	gene03660;gene04575;gene06859;gene07076;gene07085;gene11056;gene11479	;;;;;;
6	GO:0034599	BP	cellular response to oxidative stress	6/ 482	27/ 8221	0.222222	0.00405235	0.15686	gene02978;gene04013;gene08153;gene08506;gene11422;gene12322	mpn;;;mpn;mpn;mpn
6	GO:0019748	BP	secondary metabolic process	6/ 482	27/ 8221	0.222222	0.00405235	0.15686	gene04977;gene04978;gene07023;gene07807;gene08535;gene13612	;;;;;
19	GO:0008168	MF	methyltransferase activity	19/ 482	171/ 8221	0.111111	0.00732794	0.176625	gene00239;gene01151;gene01354;gene01862;gene01865;gene03630;gene03726;gene04081;gene05082;gene06361;gene06920;gene07023;gene07396;gene08304;gene08663;gene10297;gene12113;gene12189;gene13012	;;;;;;;;;;;;;;;;;;
8	GO:0006026	BP	aminoglycan catabolic process	8/ 482	46/ 8221	0.173913	0.00477749	0.177532	gene01982;gene03660;gene05174;gene06347;gene06787;gene06859;gene06991;gene11670	;;;;;;;
19	GO:0016741	MF	transferase activity, transferring one-carbon groups	19/ 482	175/ 8221	0.108571	0.00842686	0.19453	gene00239;gene01151;gene01354;gene01862;gene01865;gene03630;gene03726;gene04081;gene05082;gene06361;gene06920;gene07023;gene07396;gene08304;gene08663;gene10297;gene12113;gene12189;gene13012	;;;;;;;;;;;;;;;;;;
3	GO:0004567	MF	beta-mannosidase activity	3/ 482	8/ 8221	0.375	0.00898535	0.204541	gene04178;gene04497;gene11857	manB;;manB
6	GO:0062197	BP	cellular response to chemical stress	6/ 482	29/ 8221	0.206897	0.00588764	0.206401	gene02978;gene04013;gene08153;gene08506;gene11422;gene12322	mpn;;;mpn;mpn;mpn
6	GO:0070887	BP	cellular response to chemical stimulus	6/ 482	29/ 8221	0.206897	0.00588764	0.206401	gene02978;gene04013;gene08153;gene08506;gene11422;gene12322	mpn;;;mpn;mpn;mpn
5	GO:0004499	MF	N,N-dimethylaniline monooxygenase activity	5/ 482	24/ 8221	0.208333	0.0113962	0.249045	gene02438;gene03241;gene07353;gene07649;gene07955	;;;;
16	GO:0032259	BP	methylation	16/ 482	134/ 8221	0.119403	0.00775622	0.256223	gene00239;gene01151;gene01354;gene01862;gene01865;gene03630;gene03726;gene04081;gene06361;gene06920;gene07023;gene08304;gene08663;gene12113;gene12189;gene13012	;;;;;;;;;;;;;;;
7	GO:0071554	BP	cell wall organization or biogenesis	7/ 482	40/ 8221	0.175	0.00786044	0.256223	gene03660;gene04575;gene06859;gene07076;gene07085;gene11056;gene11479	;;;;;;
8	GO:0006022	BP	aminoglycan metabolic process	8/ 482	50/ 8221	0.16	0.00801056	0.256614	gene01982;gene03660;gene05174;gene06347;gene06787;gene06859;gene06991;gene11670	;;;;;;;
143	GO:0016787	MF	hydrolase activity	143/ 482	2042/ 8221	0.0700294	0.0124551	0.268604	gene00018;gene00021;gene00094;gene00222;gene00389;gene00523;gene00690;gene00986;gene01140;gene01141;gene01782;gene01793;gene01800;gene01868;gene01909;gene01940;gene01982;gene02046;gene02051;gene02099;gene02215;gene02735;gene02962;gene03135;gene03184;gene03631;gene03660;gene03728;gene03792;gene04008;gene04109;gene04137;gene04178;gene04213;gene04497;gene04575;gene04584;gene04680;gene04726;gene05174…	bglX;xynA;;;;htpG;;;;;;;;htpG;PLB;;;abfA;;;;;;;;;;;;;CLN2;;manB;;;;;;;;;;;;;;;;;pip;;;;;;gnl;;xynA;;;;;;;;;;;;;;bglX;;;;;;;;;mpn;;;;;;;;;;;;;;;;;;;;;xynA;CLN2;CLN2;CLN2;CLN2;CLN2;RAD2;;;;;;;;;;PLB;;;;manB;;;;sacA;;mpn;;;;;;;XPB;;;;;;;abnA;
10	GO:0030247	MF	polysaccharide binding	10/ 482	76/ 8221	0.131579	0.0127882	0.271017	gene00021;gene01964;gene04584;gene07085;gene08117;gene08133;gene08902;gene09000;gene11440;gene13686	xynA;;;;;;;;;
3	GO:0097599	MF	xylanase activity	3/ 482	9/ 8221	0.333333	0.0128977	0.271017	gene00021;gene06733;gene10151	xynA;xynA;xynA
4	GO:0044036	BP	cell wall macromolecule metabolic process	4/ 482	15/ 8221	0.266667	0.00948833	0.281168	gene00021;gene04497;gene06733;gene06787	xynA;;xynA;
4	GO:0016998	BP	cell wall macromolecule catabolic process	4/ 482	15/ 8221	0.266667	0.00948833	0.281168	gene00021;gene04497;gene06733;gene06787	xynA;;xynA;
8	GO:1901136	BP	carbohydrate derivative catabolic process	8/ 482	52/ 8221	0.153846	0.010139	0.281168	gene01982;gene03660;gene05174;gene06347;gene06787;gene06859;gene06991;gene11670	;;;;;;;
5	GO:0008061	MF	chitin binding	5/ 482	26/ 8221	0.192308	0.0160192	0.320188	gene01982;gene05174;gene06347;gene06991;gene11670	;;;;
34	GO:0009056	BP	catabolic process	34/ 482	376/ 8221	0.0904255	0.0127537	0.343425	gene00018;gene00021;gene00690;gene01188;gene01189;gene01982;gene02046;gene03660;gene04497;gene04584;gene05174;gene05190;gene06347;gene06733;gene06787;gene06859;gene06991;gene07016;gene07076;gene08117;gene08133;gene10103;gene10129;gene10132;gene10151;gene10336;gene11056;gene11437;gene11479;gene11670;gene11712;gene11784;gene13708;gene14020	bglX;xynA;;;;;abfA;;;;;gabD;;xynA;;;;INDO;;;;;katE;katE;xynA;fucD;;;;;;;abnA;
17	GO:1901565	BP	organonitrogen compound catabolic process	17/ 482	155/ 8221	0.109677	0.0137576	0.355024	gene01188;gene01189;gene01982;gene03660;gene05174;gene05190;gene06347;gene06787;gene06859;gene06991;gene07016;gene10103;gene10336;gene11437;gene11670;gene11784;gene14020	;;;;;gabD;;;;;INDO;;fucD;;;;
16	GO:0008757	MF	S-adenosylmethionine-dependent methyltransferase activity	16/ 482	147/ 8221	0.108844	0.0189057	0.366691	gene00239;gene01151;gene01354;gene01862;gene01865;gene03630;gene03726;gene04081;gene05082;gene06920;gene07023;gene07396;gene08304;gene10297;gene12189;gene13012	;;;;;;;;;;;;;;;
2	GO:0005315	MF	inorganic phosphate transmembrane transporter activity	2/ 482	4/ 8221	0.5	0.0190169	0.366691	gene00606;gene04546	;PIT
7	GO:0046348	BP	amino sugar catabolic process	7/ 482	45/ 8221	0.155556	0.0148813	0.36853	gene01982;gene03660;gene05174;gene06347;gene06859;gene06991;gene11670	;;;;;;
7	GO:1901072	BP	glucosamine-containing compound catabolic process	7/ 482	45/ 8221	0.155556	0.0148813	0.36853	gene01982;gene03660;gene05174;gene06347;gene06859;gene06991;gene11670	;;;;;;
7	GO:0006032	BP	chitin catabolic process	7/ 482	45/ 8221	0.155556	0.0148813	0.36853	gene01982;gene03660;gene05174;gene06347;gene06859;gene06991;gene11670	;;;;;;
4	GO:0006289	BP	nucleotide-excision repair	4/ 482	17/ 8221	0.235294	0.0150744	0.36853	gene04008;gene10657;gene10995;gene13186	;RAD2;;XPB
2	GO:0042743	BP	hydrogen peroxide metabolic process	2/ 482	4/ 8221	0.5	0.0190169	0.401517	gene10129;gene10132	katE;katE
2	GO:0042744	BP	hydrogen peroxide catabolic process	2/ 482	4/ 8221	0.5	0.0190169	0.401517	gene10129;gene10132	katE;katE
2	GO:0006817	BP	phosphate ion transport	2/ 482	4/ 8221	0.5	0.0190169	0.401517	gene00606;gene04546	;PIT
5	GO:0016709	MF	oxidoreductase activity, acting on paired donors, with incorporation or reduction of molecular oxygen, NAD(P)H as one donor, and incorporation of one atom of oxygen	5/ 482	28/ 8221	0.178571	0.0217458	0.402942	gene02438;gene03241;gene07353;gene07649;gene07955	;;;;
7	GO:0006030	BP	chitin metabolic process	7/ 482	49/ 8221	0.142857	0.0230631	0.455865	gene01982;gene03660;gene05174;gene06347;gene06859;gene06991;gene11670	;;;;;;
7	GO:1901071	BP	glucosamine-containing compound metabolic process	7/ 482	50/ 8221	0.14	0.0255136	0.488734	gene01982;gene03660;gene05174;gene06347;gene06859;gene06991;gene11670	;;;;;;
7	GO:0016627	MF	oxidoreductase activity, acting on the CH-CH group of donors	7/ 482	51/ 8221	0.137255	0.0281362	0.512392	gene00971;gene00972;gene05307;gene06089;gene06553;gene06555;gene12208	;;;;;;
2	GO:0004503	MF	tyrosinase activity	2/ 482	5/ 8221	0.4	0.0304732	0.533265	gene04977;gene04978	;
2	GO:0016716	MF	oxidoreductase activity, acting on paired donors, with incorporation or reduction of molecular oxygen, another compound as one donor, and incorporation of one atom of oxygen	2/ 482	5/ 8221	0.4	0.0304732	0.533265	gene04977;gene04978	;
2	GO:0003885	MF	D-arabinono-1,4-lactone oxidase activity	2/ 482	5/ 8221	0.4	0.0304732	0.533265	gene02083;gene05352	;
38	GO:0006508	BP	proteolysis	38/ 482	456/ 8221	0.0833333	0.03043	0.549701	gene01140;gene01188;gene01189;gene01782;gene01981;gene02962;gene03135;gene04109;gene04213;gene04680;gene04726;gene05417;gene05445;gene05571;gene05933;gene06120;gene07187;gene07711;gene08392;gene08512;gene08910;gene09151;gene09708;gene10114;gene10252;gene10266;gene10267;gene10274;gene10398;gene10717;gene11437;gene12460;gene12927;gene13218;gene13219;gene13560;gene13610;gene14020	;;;;;;;CLN2;;;;;;;pip;;;;;;;;;;CLN2;CLN2;CLN2;CLN2;CLN2;;;;;;;;;
2	GO:0006582	BP	melanin metabolic process	2/ 482	5/ 8221	0.4	0.0304732	0.549701	gene04977;gene04978	;
2	GO:0046189	BP	phenol-containing compound biosynthetic process	2/ 482	5/ 8221	0.4	0.0304732	0.549701	gene04977;gene04978	;
2	GO:0042438	BP	melanin biosynthetic process	2/ 482	5/ 8221	0.4	0.0304732	0.549701	gene04977;gene04978	;
9	GO:0030248	MF	cellulose binding	9/ 482	72/ 8221	0.125	0.0367351	0.627175	gene00021;gene01964;gene07085;gene08117;gene08133;gene08902;gene09000;gene11440;gene13686	xynA;;;;;;;;
16	GO:0030246	MF	carbohydrate binding	16/ 482	158/ 8221	0.101266	0.0372746	0.629825	gene00021;gene00389;gene01964;gene02084;gene04584;gene05263;gene05446;gene07085;gene08117;gene08133;gene08902;gene09000;gene11440;gene11670;gene11780;gene13686	xynA;;;;;;;;;;;;;;;
34	GO:0008233	MF	peptidase activity	34/ 482	406/ 8221	0.0837438	0.0384947	0.637302	gene01140;gene01782;gene02962;gene03135;gene04109;gene04213;gene04680;gene04726;gene05417;gene05445;gene05571;gene05933;gene06120;gene07187;gene07711;gene08392;gene08512;gene08910;gene09151;gene09708;gene10114;gene10252;gene10266;gene10267;gene10274;gene10398;gene10717;gene11253;gene12460;gene12927;gene13218;gene13219;gene13560;gene13610	;;;;CLN2;;;;;;;pip;;;;;;;;;;CLN2;CLN2;CLN2;CLN2;CLN2;;;;;;;;
4	GO:0005507	MF	copper ion binding	4/ 482	23/ 8221	0.173913	0.042541	0.690344	gene09718;gene10938;gene11268;gene11642	;;;
2	GO:0016899	MF	oxidoreductase activity, acting on the CH-OH group of donors, oxygen as acceptor	2/ 482	6/ 8221	0.333333	0.0439569	0.69947	gene02083;gene05352	;
2	GO:0052716	MF	hydroquinone:oxygen oxidoreductase activity	2/ 482	6/ 8221	0.333333	0.0439569	0.69947	gene10938;gene11642	;
5	GO:0004568	MF	chitinase activity	5/ 482	34/ 8221	0.147059	0.046277	0.722362	gene01982;gene05174;gene06347;gene06991;gene11670	;;;;
2	GO:0072593	BP	reactive oxygen species metabolic process	2/ 482	6/ 8221	0.333333	0.0439569	0.75016	gene10129;gene10132	katE;katE
3	GO:0010383	BP	cell wall polysaccharide metabolic process	3/ 482	14/ 8221	0.214286	0.0449474	0.752363	gene00021;gene04497;gene06733	xynA;;xynA
3	GO:0044347	BP	cell wall polysaccharide catabolic process	3/ 482	14/ 8221	0.214286	0.0449474	0.752363	gene00021;gene04497;gene06733	xynA;;xynA
7	GO:0006040	BP	amino sugar metabolic process	7/ 482	57/ 8221	0.122807	0.0477233	0.788068	gene01982;gene03660;gene05174;gene06347;gene06859;gene06991;gene11670	;;;;;;

## Sheet: Supplemental Table 5.3
Supplemental Table 5.3 Differential gene expression in different groups (EHT_vs_NT)
Number	GO ID	Term Type	Description	Ratio_in_study	Ratio_in_pop	Rich factor	Pvalue	Padjust	Gene_ids	Gene_names
440	GO:0016491	MF	oxidoreductase activity	440/ 3080	899/ 8221	0.489433	1.29943e-13	1.52126e-11	gene00066;gene00096;gene00104;gene00105;gene00143;gene00221;gene00255;gene00299;gene00317;gene00330;gene00343;gene00370;gene00438;gene00468;gene00505;gene00640;gene00648;gene00659;gene00704;gene00736;gene00903;gene00912;gene00913;gene00943;gene00949;gene00971;gene00972;gene01089;gene01094;gene01140;gene01196;gene01237;gene01267;gene01279;gene01295;gene01330;gene01382;gene01397;gene01541;gene01548…	;;;;;wrbA;;MOT1;;;katE;qor;;;;;mmsB;;;;;;;;;;;;;;;;;;gst;;;CHCHD4;;;;asd;;;;;;;;IFA38;gapA;IFA38;;lldD;;;;;;;;adhP;;;;;;;;;;;;;;;;RPN2;guaB;;;mpn;;;;;;;;;;;;;;;;;;;;;;;metX;;;;;;;;;;;;;;;;;;;;;;;;pcaC;mmsB;;;;;;;;;gabD;gabD;grxC;;;;desC;;;;;;;;;pdhB;gabD;zwf;;cysJ;;;;;leuB;panE;;;;frmA;;;;lldD;;;;;paaH;RBM19;;;;;;;;;THI1;;;;;;;;;;;;;;;;;;;;;;;;;;;;;;;;;;;;qor;;sucA;;trxB;;;;;;;;;;;;;;;;;gnd;;;;;f…
74	GO:0003735	MF	structural constituent of ribosome	74/ 3080	118/ 8221	0.627119	2.54656e-08	1.30432e-06	gene00080;gene00353;gene00396;gene00638;gene01193;gene01341;gene01343;gene01376;gene01423;gene01518;gene01801;gene02463;gene02503;gene02506;gene02554;gene02638;gene02691;gene02979;gene03248;gene03417;gene03455;gene03474;gene03488;gene03522;gene03575;gene03632;gene04045;gene04278;gene04448;gene04468;gene04532;gene04610;gene04783;gene05080;gene05251;gene05478;gene05546;gene05549;gene05589;gene05688…	RPL44;;;;rpmH;RPS23;rpsO;RPS2;rpsF;RPL12;psd;RPL19;RPL32;;RPS11;RPS27;;rpmG;RPL35A;RPL37A;RPS27A;;RPL11;rplW;RPS24;RPL13A;;rpmA;;rpmB;RPL34;rplA;rplE;RPL18A;;RPL18;;RPL36;rplL;RPL29;;;;rpsK;;RPL40;RPL23A;;rplM;NCM1;rpsL;RPS28;RPL10A;RPS17;RPS15A;RPS30;;RPL23;RPS13;RPL7;RPLP2;;;RPS20;RPL26;rpsM;RPS5;RPS9;;;;RPS21;RPL27A;
74	GO:0006518	BP	peptide metabolic process	74/ 3080	118/ 8221	0.627119	2.54656e-08	3.94293e-06	gene00080;gene00353;gene00396;gene01140;gene01193;gene01341;gene01343;gene01376;gene01416;gene01423;gene01518;gene02463;gene02503;gene02506;gene02554;gene02638;gene02687;gene02691;gene02979;gene03248;gene03417;gene03455;gene03474;gene03488;gene03522;gene03575;gene03632;gene04045;gene04278;gene04296;gene04448;gene04468;gene04532;gene04609;gene04610;gene04783;gene05080;gene05251;gene05478;gene05546…	RPL44;;;;rpmH;RPS23;rpsO;RPS2;;rpsF;RPL12;RPL19;RPL32;;RPS11;RPS27;SPC3;;rpmG;RPL35A;RPL37A;RPS27A;;RPL11;rplW;RPS24;RPL13A;;rpmA;;;rpmB;RPL34;;rplA;rplE;RPL18A;;RPL18;;RPL36;rplL;RPL29;;;;rpsK;RPL40;RPL23A;;rplM;NCM1;rpsL;RPS28;RPL10A;RPS17;RPS15A;RPS30;;;RPL23;;RPS13;RPS20;RPL26;rpsM;RPS5;RPS9;;rpsG;;RPS21;RPL27A;
114	GO:0004497	MF	monooxygenase activity	114/ 3080	205/ 8221	0.556098	1.06571e-07	5.13733e-06	gene00299;gene00505;gene00659;gene00736;gene00913;gene00949;gene01089;gene01196;gene01267;gene02025;gene02027;gene02028;gene02438;gene02471;gene02475;gene02665;gene02860;gene02890;gene03226;gene03374;gene03699;gene04039;gene04395;gene04414;gene04472;gene04571;gene04723;gene04973;gene04977;gene04978;gene05023;gene05151;gene05185;gene05335;gene05343;gene05711;gene05956;gene06209;gene06245;gene06333…	MOT1;;;;;;;;;;;;;;;;;;;;;;;;;;;;;;;;;;;;;;RBM19;;;;;;;;;;;;;;;;;;;;;cypD_E;;;;;;;;;cypD_E;cypD_E;;;;;;;;;;;;;;;;;;;;;;;;;;;;;;;;;;;;;;;;;;;;
71	GO:0043043	BP	peptide biosynthetic process	71/ 3080	113/ 8221	0.628319	4.17869e-08	5.97231e-06	gene00080;gene00353;gene00396;gene01193;gene01341;gene01343;gene01376;gene01416;gene01423;gene01518;gene02463;gene02503;gene02506;gene02554;gene02638;gene02691;gene02979;gene03248;gene03417;gene03455;gene03474;gene03488;gene03522;gene03575;gene03632;gene04045;gene04278;gene04296;gene04448;gene04468;gene04532;gene04609;gene04610;gene04783;gene05080;gene05251;gene05478;gene05546;gene05549;gene05589…	RPL44;;;rpmH;RPS23;rpsO;RPS2;;rpsF;RPL12;RPL19;RPL32;;RPS11;RPS27;;rpmG;RPL35A;RPL37A;RPS27A;;RPL11;rplW;RPS24;RPL13A;;rpmA;;;rpmB;RPL34;;rplA;rplE;RPL18A;;RPL18;;RPL36;rplL;RPL29;;;;rpsK;RPL40;RPL23A;;rplM;NCM1;rpsL;RPS28;RPL10A;RPS17;RPS15A;RPS30;;;RPL23;RPS13;RPS20;RPL26;rpsM;RPS5;RPS9;;rpsG;;RPS21;RPL27A;
92	GO:0043603	BP	amide metabolic process	92/ 3080	156/ 8221	0.589744	5.61225e-08	7.44825e-06	gene00080;gene00353;gene00396;gene01140;gene01193;gene01341;gene01343;gene01376;gene01416;gene01423;gene01518;gene01708;gene02463;gene02503;gene02506;gene02554;gene02638;gene02687;gene02691;gene02979;gene03248;gene03406;gene03417;gene03455;gene03474;gene03488;gene03522;gene03575;gene03632;gene03869;gene04045;gene04244;gene04278;gene04296;gene04448;gene04468;gene04532;gene04609;gene04610;gene04783…	RPL44;;;;rpmH;RPS23;rpsO;RPS2;;rpsF;RPL12;alc;RPL19;RPL32;;RPS11;RPS27;SPC3;;rpmG;RPL35A;;RPL37A;RPS27A;;RPL11;rplW;RPS24;RPL13A;;;;rpmA;;;rpmB;RPL34;;rplA;rplE;acs;RPL18A;gadB;;;RPL18;;RPL36;pdhB;rplL;RPL29;;;;folE;panE;rpsK;RPL40;ASM;ASM;RPL23A;;;rplM;NCM1;rpsL;RPS28;RPL10A;RPS17;RPS15A;RPS30;;;;RPL23;;RPS13;panB;RPS20;RPL26;rpsM;;;RPS5;RPS9;;;rpsG;;RPS21;RPL27A;
81	GO:0043604	BP	amide biosynthetic process	81/ 3080	134/ 8221	0.604478	6.6319e-08	8.21472e-06	gene00080;gene00353;gene00396;gene01193;gene01341;gene01343;gene01376;gene01416;gene01423;gene01518;gene02463;gene02503;gene02506;gene02554;gene02638;gene02691;gene02979;gene03248;gene03417;gene03455;gene03474;gene03488;gene03522;gene03575;gene03632;gene04045;gene04244;gene04278;gene04296;gene04448;gene04468;gene04532;gene04609;gene04610;gene04783;gene04878;gene05080;gene05251;gene05314;gene05478…	RPL44;;;rpmH;RPS23;rpsO;RPS2;;rpsF;RPL12;RPL19;RPL32;;RPS11;RPS27;;rpmG;RPL35A;RPL37A;RPS27A;;RPL11;rplW;RPS24;RPL13A;;;rpmA;;;rpmB;RPL34;;rplA;rplE;acs;RPL18A;;;RPL18;;RPL36;pdhB;rplL;RPL29;;;;folE;panE;rpsK;RPL40;ASM;ASM;RPL23A;;rplM;NCM1;rpsL;RPS28;RPL10A;RPS17;RPS15A;RPS30;;;RPL23;RPS13;panB;RPS20;RPL26;rpsM;RPS5;RPS9;;;rpsG;;RPS21;RPL27A;
68	GO:0006412	BP	translation	68/ 3080	109/ 8221	0.623853	1.29453e-07	1.50327e-05	gene00080;gene00353;gene00396;gene01193;gene01341;gene01343;gene01376;gene01423;gene01518;gene02463;gene02503;gene02506;gene02554;gene02638;gene02691;gene02979;gene03248;gene03417;gene03455;gene03474;gene03488;gene03522;gene03575;gene03632;gene04045;gene04278;gene04296;gene04448;gene04468;gene04532;gene04609;gene04610;gene04783;gene05080;gene05251;gene05478;gene05546;gene05549;gene05589;gene05688…	RPL44;;;rpmH;RPS23;rpsO;RPS2;rpsF;RPL12;RPL19;RPL32;;RPS11;RPS27;;rpmG;RPL35A;RPL37A;RPS27A;;RPL11;rplW;RPS24;RPL13A;;rpmA;;;rpmB;RPL34;;rplA;rplE;RPL18A;;RPL18;;RPL36;rplL;RPL29;;;;rpsK;RPL40;RPL23A;;rplM;NCM1;rpsL;RPS28;RPL10A;RPS17;RPS15A;RPS30;RPL23;RPS13;RPS20;RPL26;rpsM;RPS5;RPS9;;rpsG;;RPS21;RPL27A;
85	GO:0016052	BP	carbohydrate catabolic process	85/ 3080	146/ 8221	0.582192	3.83233e-07	4.18852e-05	gene00018;gene00065;gene00558;gene00560;gene00566;gene00710;gene00771;gene00831;gene00913;gene01399;gene01733;gene01779;gene01844;gene01859;gene02121;gene02665;gene02804;gene02986;gene03148;gene03385;gene03435;gene03626;gene03660;gene03715;gene03735;gene03987;gene04497;gene04584;gene04648;gene04953;gene05174;gene05280;gene05393;gene05432;gene05542;gene05727;gene05806;gene05812;gene06025;gene06172…	bglX;;;cbhA;;NOT1;pgk;;;;;gapA;abfA;;;;;;;xynA;;;;;;;;;;;;pgi;xynA;abnA;abnA;;;pel;glpK;;;;tpiA;;abnA;;;gpmI;;;xynA;;;;;;;;abf1;abnA;;rhiE;;;;;fucD;;;;fbaA;;;eno;;abnA;;;;;;bglX;;;
165	GO:0016705	MF	oxidoreductase activity, acting on paired donors, with incorporation or reduction of molecular oxygen	165/ 3080	327/ 8221	0.504587	1.15506e-06	4.98197e-05	gene00104;gene00105;gene00299;gene00317;gene00330;gene00468;gene00505;gene00736;gene00949;gene01089;gene01140;gene01196;gene01267;gene01548;gene02007;gene02025;gene02027;gene02028;gene02321;gene02438;gene02471;gene02475;gene02541;gene02860;gene02890;gene02981;gene02994;gene03103;gene03113;gene03151;gene03226;gene03374;gene03425;gene03699;gene04039;gene04244;gene04395;gene04408;gene04414;gene04458…	;;MOT1;;;;;;;;;;;;;;;;;;;;;;;;;;;;;;;;;;;;;;;;;;;;;;;;;desC;;;;;;;;;RBM19;;;;;;THI1;;;;;;;;trxB;;;;;;;;;;;;;;;;;cypD_E;;;;;;;;;;;;;;;cypD_E;cypD_E;;;;;;;desC;;;;;;;;;;;;;;;;;;;;;;;;;;;;;;;;;;;;;;;;;;;;;;;;;;
204	GO:0005975	BP	carbohydrate metabolic process	204/ 3080	414/ 8221	0.492754	5.17593e-07	5.34271e-05	gene00018;gene00065;gene00075;gene00372;gene00389;gene00558;gene00560;gene00566;gene00710;gene00738;gene00771;gene00831;gene00913;gene01141;gene01261;gene01273;gene01399;gene01585;gene01681;gene01733;gene01779;gene01844;gene01859;gene01953;gene01964;gene01984;gene02084;gene02086;gene02121;gene02203;gene02210;gene02473;gene02605;gene02647;gene02665;gene02686;gene02781;gene02804;gene02808;gene02854…	bglX;;;galA;;;cbhA;;NOT1;;pgk;;;;;;;;;;gapA;abfA;;;;glgP;;;;bglX;;;;;;malZ;;;;nagB;;;;;pgm;;manB;xynA;;;pyc;malZ;;;bglX;;;;;;CFT2;;;malZ;;;;;;;;;;manB;;;;;;pgi;xynA;galE;;abnA;;abnA;zwf;glgB;;;;pel;;;uxs;;glpK;;;xylB;;;;tpiA;;;;abnA;;;;;;;;gpmI;;;;gnd;xynA;;;;;;;;;;;;;;;;;abf1;;;;;;;;;abnA;;;;;xfp;;;;rhiE;;;;;;;;;;malZ;;fucD;;;;;fbaA;;talA;;;eno;;abnA;;;;;;;;;;manB;bglX;;;aceB;;;;;;;;;bglX;
78	GO:0005976	BP	polysaccharide metabolic process	78/ 3080	133/ 8221	0.586466	7.4425e-07	7.27798e-05	gene00018;gene00065;gene00558;gene00560;gene00566;gene00831;gene00913;gene01399;gene01733;gene01844;gene01859;gene02121;gene02665;gene02804;gene02986;gene03148;gene03385;gene03626;gene03660;gene03715;gene03735;gene03987;gene04415;gene04497;gene04584;gene04648;gene04953;gene05174;gene05393;gene05432;gene05542;gene05721;gene05727;gene05812;gene06172;gene06347;gene06414;gene06471;gene06612;gene06859…	bglX;;;cbhA;;;;;;abfA;;;;;;;xynA;;;;;;;;;;;;xynA;abnA;abnA;glgB;;pel;;;;;abnA;;;;;xynA;;;;;;;;abf1;abnA;;;;rhiE;;;;;;;;;;;abnA;;;;;;bglX;;;;
120	GO:1990904	CC	ribonucleoprotein complex	120/ 3080	227/ 8221	0.528634	1.92169e-06	0.000152775	gene00080;gene00296;gene00369;gene00396;gene00474;gene00638;gene00742;gene00746;gene00751;gene00752;gene01126;gene01193;gene01312;gene01341;gene01343;gene01376;gene01481;gene01518;gene01801;gene01961;gene02063;gene02103;gene02154;gene02463;gene02490;gene02503;gene02506;gene02537;gene02554;gene02638;gene02691;gene02740;gene02741;gene02795;gene02908;gene02979;gene03455;gene03474;gene03488;gene03522…	RPL44;;SAP114;;;;;NOLA1;;;CWC24;rpmH;RPP21;RPS23;rpsO;RPS2;;RPL12;psd;;;;;RPL19;;RPL32;;SMD2;RPS11;RPS27;;;;PPP1R59;;rpmG;RPS27A;;RPL11;rplW;RPS24;RPL13A;;;;;rpmA;;rpmB;RPL34;;SAP62;rplA;RPL7A;INT6;rplE;RPL18A;;;;RPL18;RPL36;rplL;RPL29;NOLA2;;;BOP1;;;;RPS25;;rpsK;;RPL40;RPL23A;;;rplM;NCM1;rpsL;;;CBF5;RPL10A;RPS17;RPS15A;RPS30;;;;RPL23;NOL6;FCF1;;RPS13;;RPL7;RPLP2;;CWC26;;;RPS20;;RPL26;rpsM;RPS5;R…
73	GO:0000272	BP	polysaccharide catabolic process	73/ 3080	126/ 8221	0.579365	2.7893e-06	0.000246787	gene00018;gene00065;gene00558;gene00560;gene00566;gene00831;gene00913;gene01399;gene01733;gene01844;gene01859;gene02121;gene02665;gene02804;gene02986;gene03148;gene03385;gene03626;gene03660;gene03715;gene03735;gene03987;gene04497;gene04584;gene04648;gene04953;gene05174;gene05393;gene05432;gene05542;gene05727;gene05812;gene06172;gene06347;gene06414;gene06471;gene06612;gene06859;gene07076;gene07323…	bglX;;;cbhA;;;;;;abfA;;;;;;;xynA;;;;;;;;;;;xynA;abnA;abnA;;pel;;;;;abnA;;;;;xynA;;;;;;;;abf1;abnA;;rhiE;;;;;;;;;;;abnA;;;;;;bglX;;;
89	GO:0005506	MF	iron ion binding	89/ 3080	163/ 8221	0.546012	8.43285e-06	0.000321429	gene00317;gene00330;gene01196;gene01267;gene02025;gene02027;gene02028;gene02321;gene02471;gene02475;gene02860;gene03226;gene03374;gene04039;gene04244;gene04414;gene04571;gene05023;gene05151;gene05185;gene05335;gene05343;gene05711;gene06333;gene06353;gene06374;gene06416;gene06481;gene06642;gene06747;gene06791;gene06955;gene07119;gene07124;gene07132;gene07698;gene07763;gene07804;gene07840;gene07934…	;;;;;;;;;;;;;;;;;;;;;;;;;;THI1;;;;;;;;;;;;;;;cypD_E;;;;;;;;;;cypD_E;cypD_E;;;;;;;;;;;;;;;;;;;;;;;;;;;;;;;;;;;;
91	GO:0005198	MF	structural molecule activity	91/ 3080	168/ 8221	0.541667	1.13836e-05	0.000414617	gene00080;gene00353;gene00396;gene00638;gene01193;gene01341;gene01343;gene01376;gene01423;gene01518;gene01801;gene02463;gene02503;gene02506;gene02554;gene02638;gene02691;gene02719;gene02979;gene03202;gene03209;gene03248;gene03307;gene03417;gene03445;gene03455;gene03474;gene03488;gene03522;gene03575;gene03632;gene03764;gene04045;gene04148;gene04278;gene04448;gene04468;gene04532;gene04610;gene04783…	RPL44;;;;rpmH;RPS23;rpsO;RPS2;rpsF;RPL12;psd;RPL19;RPL32;;RPS11;RPS27;;NUP157;rpmG;;;RPL35A;;RPL37A;;RPS27A;;RPL11;rplW;RPS24;RPL13A;;;;rpmA;;rpmB;RPL34;rplA;rplE;;RPL18A;;RPL18;;RPL36;;rplL;RPL29;;;;rpsK;;RPL40;RPL23A;;rplM;NCM1;rpsL;RPS28;RPL10A;RPS17;RPS15A;RPS30;;RPL23;;;RPS13;RPL7;RPLP2;;;NUP49;RPS20;RPL26;rpsM;;;;RPS5;RPS9;;;;;;RPS21;RPL27A;
70	GO:0005840	CC	ribosome	70/ 3080	124/ 8221	0.564516	2.0663e-05	0.00123203	gene00080;gene00396;gene00462;gene00638;gene01193;gene01341;gene01343;gene01376;gene01423;gene01518;gene01801;gene02463;gene02503;gene02506;gene02554;gene02638;gene02691;gene02722;gene02979;gene03248;gene03417;gene03455;gene03488;gene03522;gene03575;gene03632;gene04045;gene04259;gene04278;gene04448;gene04468;gene04532;gene04610;gene04613;gene04783;gene05080;gene05478;gene05546;gene05549;gene05589…	RPL44;;EXOSC6;;rpmH;RPS23;rpsO;RPS2;rpsF;RPL12;psd;RPL19;RPL32;;RPS11;RPS27;;;rpmG;RPL35A;RPL37A;RPS27A;RPL11;rplW;RPS24;RPL13A;;RPL24;rpmA;;rpmB;RPL34;rplA;RPL7A;rplE;RPL18A;RPL18;;RPL36;rplL;RPL29;;;RPS25;rpsK;RPL40;RSL1D1;;RPL23A;;rplM;NCM1;RPS28;RPL10A;RPS17;RPS15A;RPS30;RPL23;RPS13;RPL7;RPS20;rpsM;RPS5;RPS9;;rpsG;;;RPS21;
103	GO:0020037	MF	heme binding	103/ 3080	199/ 8221	0.517588	4.04941e-05	0.00135449	gene00096;gene00143;gene00343;gene01196;gene01267;gene01330;gene01548;gene01688;gene01908;gene02025;gene02027;gene02028;gene02471;gene02475;gene02860;gene02978;gene03226;gene03374;gene04013;gene04039;gene04298;gene04414;gene04571;gene05023;gene05151;gene05185;gene05330;gene05335;gene05343;gene05711;gene06124;gene06333;gene06353;gene06374;gene06481;gene06526;gene06642;gene06670;gene06747;gene06791…	;;katE;;;;;;lldD;;;;;;;mpn;;;;;;;;;;;desC;;;;lldD;;;;;;;;;;;;;;;;;;;;;cypD_E;;;katE;mpn;;;;;katE;;;cypD_E;cypD_E;;;;;desC;;;;;;;;;;;;;;;;;;;;;;;;;;;;;;;;;
103	GO:0046906	MF	tetrapyrrole binding	103/ 3080	199/ 8221	0.517588	4.04941e-05	0.00135449	gene00096;gene00143;gene00343;gene01196;gene01267;gene01330;gene01548;gene01688;gene01908;gene02025;gene02027;gene02028;gene02471;gene02475;gene02860;gene02978;gene03226;gene03374;gene04013;gene04039;gene04298;gene04414;gene04571;gene05023;gene05151;gene05185;gene05330;gene05335;gene05343;gene05711;gene06124;gene06333;gene06353;gene06374;gene06481;gene06526;gene06642;gene06670;gene06747;gene06791…	;;katE;;;;;;lldD;;;;;;;mpn;;;;;;;;;;;desC;;;;lldD;;;;;;;;;;;;;;;;;;;;;cypD_E;;;katE;mpn;;;;;katE;;;cypD_E;cypD_E;;;;;desC;;;;;;;;;;;;;;;;;;;;;;;;;;;;;;;;;
310	GO:0009058	BP	biosynthetic process	310/ 3080	687/ 8221	0.451237	1.80935e-05	0.00140074	gene00080;gene00109;gene00264;gene00266;gene00353;gene00392;gene00396;gene00505;gene00533;gene00595;gene00607;gene00640;gene00736;gene00981;gene01089;gene01193;gene01289;gene01315;gene01341;gene01343;gene01365;gene01376;gene01400;gene01416;gene01423;gene01455;gene01473;gene01504;gene01518;gene01519;gene01522;gene01599;gene01609;gene01610;gene01801;gene01841;gene01842;gene01890;gene01957;gene01973…	RPL44;FMN1;plc;;;SPT6;;;pgsA;ilvB;leuA;;;;;rpmH;purL;POLR2K;RPS23;rpsO;;RPS2;thyA;;rpsF;ppnK;;sat;RPL12;;ilvH;asd;ilvD;ilvD;psd;RPO41;psd;;;;rocD;POLR1B;;;ADA2;POLR1E;;;;;RPL19;RPL32;;;RPS11;;RPS27;ilvE;;guaB;;;HIR1;rpmG;;bioF;RPL35A;tmk;POLR3D;;EAP20;RPL37A;;RPS27A;pyc;;RPL11;;rplW;argG;RPS24;RPL13A;POLR2G;;pheA2;;;;hisA;hisA;TFG1;;metX;TIFIA;;;;rpmA;;POLR2F;;;rpmB;cysQ;RPL34;thrC;;rplA;cfa;;ADK…
78	GO:0005576	CC	extracellular region	78/ 3080	143/ 8221	0.545455	3.54935e-05	0.00188115	gene00096;gene00104;gene00105;gene00143;gene00309;gene00372;gene00560;gene00566;gene00913;gene01261;gene01399;gene01732;gene01733;gene01953;gene01964;gene02665;gene03018;gene03136;gene03148;gene03295;gene03385;gene03626;gene03713;gene03735;gene04282;gene05156;gene05318;gene05393;gene05414;gene05446;gene05727;gene05812;gene05981;gene06661;gene06665;gene06668;gene06670;gene06773;gene07076;gene07085…	;;;;;galA;cbhA;;;;;;;;;;;;;manB;xynA;;bglX;;;;;xynA;;;;pel;;;ASM;ASM;;;;;;;xynA;;;;;;;;abf1;;;;;;;;rhiE;;;;;;;;;;;;;;manB;;;;;
138	GO:0009059	BP	macromolecule biosynthetic process	138/ 3080	279/ 8221	0.494624	3.96802e-05	0.00283561	gene00080;gene00353;gene00392;gene00396;gene00981;gene01193;gene01315;gene01341;gene01343;gene01365;gene01376;gene01423;gene01518;gene01519;gene01801;gene01841;gene01890;gene02003;gene02055;gene02201;gene02226;gene02281;gene02283;gene02355;gene02463;gene02503;gene02506;gene02554;gene02638;gene02691;gene02840;gene02901;gene02979;gene03022;gene03248;gene03369;gene03417;gene03455;gene03474;gene03488…	RPL44;;SPT6;;;rpmH;POLR2K;RPS23;rpsO;;RPS2;rpsF;RPL12;;psd;RPO41;;POLR1B;;POLR1E;;;;;RPL19;RPL32;;RPS11;RPS27;;;HIR1;rpmG;;RPL35A;POLR3D;RPL37A;RPS27A;;RPL11;rplW;RPS24;RPL13A;POLR2G;;TFG1;;TIFIA;;rpmA;;POLR2F;;;rpmB;RPL34;;rplA;rplE;;RPL18A;;RPL18;;;RPL36;rplL;POLR2C;RPL29;glgB;;;;rpsK;POLR2H;RAT1;TFG2;;;TFA2;;;;;RPL40;;SUS1;RPL23A;;;rplM;NCM1;rpsL;RPS28;RPL10A;RPS17;RPS15A;RPS30;;;RPL23;;;ZNRD1…
278	GO:1901576	BP	organic substance biosynthetic process	278/ 3080	615/ 8221	0.452033	4.57507e-05	0.00314833	gene00080;gene00109;gene00353;gene00392;gene00396;gene00505;gene00533;gene00595;gene00607;gene00640;gene00736;gene00981;gene01193;gene01289;gene01315;gene01341;gene01343;gene01365;gene01376;gene01400;gene01416;gene01423;gene01455;gene01473;gene01504;gene01518;gene01519;gene01522;gene01599;gene01609;gene01610;gene01801;gene01841;gene01842;gene01890;gene01957;gene01973;gene01999;gene02003;gene02055…	RPL44;FMN1;;SPT6;;;pgsA;ilvB;leuA;;;;rpmH;purL;POLR2K;RPS23;rpsO;;RPS2;thyA;;rpsF;ppnK;;sat;RPL12;;ilvH;asd;ilvD;ilvD;psd;RPO41;psd;;;;rocD;POLR1B;;;ADA2;POLR1E;;;;;RPL19;RPL32;;;RPS11;;RPS27;ilvE;;guaB;;;HIR1;rpmG;;RPL35A;tmk;POLR3D;;EAP20;RPL37A;;RPS27A;pyc;;RPL11;;rplW;argG;RPS24;RPL13A;POLR2G;;pheA2;;;hisA;hisA;TFG1;;TIFIA;;;;rpmA;;POLR2F;;;rpmB;cysQ;RPL34;thrC;;rplA;cfa;;ADK;rplE;;acs;;;;;gl…
135	GO:0043232	CC	intracellular non-membrane-bounded organelle	135/ 3080	275/ 8221	0.490909	7.94853e-05	0.00344677	gene00080;gene00254;gene00326;gene00336;gene00396;gene00462;gene00470;gene00496;gene00530;gene00604;gene00638;gene00746;gene00813;gene01193;gene01212;gene01341;gene01343;gene01344;gene01365;gene01376;gene01395;gene01423;gene01518;gene01801;gene01947;gene01950;gene02190;gene02201;gene02228;gene02463;gene02503;gene02506;gene02554;gene02638;gene02664;gene02691;gene02722;gene02724;gene02733;gene02740…	RPL44;;MYBBP1A;;;EXOSC6;WDR74;;;;;NOLA1;XMAP215;rpmH;;RPS23;rpsO;;;RPS2;;rpsF;RPL12;psd;;;SET2;POLR1E;;RPL19;RPL32;;RPS11;RPS27;HAS1;;;;;;;rpmG;RPL35A;RPL37A;;RPS27A;RPL11;rplW;RPS24;RPL13A;;;RPL24;rpmA;DIM2;;GLTSCR2;rpmB;RPL34;rplA;RPL7A;cfa;rplE;RPL18A;RPL18;;;RPL36;rplL;;RPL29;;NOLA2;BOP1;;;;RPS25;;rpsK;ABT1;;RPL40;RSL1D1;;SUS1;RPL23A;;;;;rplM;NCM1;;RPS28;RPL10A;RPS17;RPS15A;;RPS30;;RPL23;;NOL…
135	GO:0043228	CC	non-membrane-bounded organelle	135/ 3080	275/ 8221	0.490909	7.94853e-05	0.00344677	gene00080;gene00254;gene00326;gene00336;gene00396;gene00462;gene00470;gene00496;gene00530;gene00604;gene00638;gene00746;gene00813;gene01193;gene01212;gene01341;gene01343;gene01344;gene01365;gene01376;gene01395;gene01423;gene01518;gene01801;gene01947;gene01950;gene02190;gene02201;gene02228;gene02463;gene02503;gene02506;gene02554;gene02638;gene02664;gene02691;gene02722;gene02724;gene02733;gene02740…	RPL44;;MYBBP1A;;;EXOSC6;WDR74;;;;;NOLA1;XMAP215;rpmH;;RPS23;rpsO;;;RPS2;;rpsF;RPL12;psd;;;SET2;POLR1E;;RPL19;RPL32;;RPS11;RPS27;HAS1;;;;;;;rpmG;RPL35A;RPL37A;;RPS27A;RPL11;rplW;RPS24;RPL13A;;;RPL24;rpmA;DIM2;;GLTSCR2;rpmB;RPL34;rplA;RPL7A;cfa;rplE;RPL18A;RPL18;;;RPL36;rplL;;RPL29;;NOLA2;BOP1;;;;RPS25;;rpsK;ABT1;;RPL40;RSL1D1;;SUS1;RPL23A;;;;;rplM;NCM1;;RPS28;RPL10A;RPS17;RPS15A;;RPS30;;RPL23;;NOL…
83	GO:0030246	MF	carbohydrate binding	83/ 3080	158/ 8221	0.525316	0.000120681	0.00395593	gene00317;gene00330;gene00389;gene00560;gene00566;gene00913;gene01261;gene01399;gene01585;gene01733;gene01953;gene01964;gene02084;gene02321;gene02665;gene02686;gene02781;gene03018;gene03148;gene03294;gene03385;gene03613;gene03626;gene03713;gene03735;gene04282;gene04364;gene04424;gene04584;gene05263;gene05393;gene05414;gene05446;gene05727;gene05806;gene05981;gene06534;gene07085;gene07100;gene07460…	;;;cbhA;;;;;;;;;;;;malZ;;;;malZ;xynA;malZ;;bglX;;;malZ;;;;xynA;;;;;;;;;;xynA;;;;;;;;;;;;;;;;;;;;;rhiE;;;;;malZ;;;;;;;;;;;;;;;;
260	GO:0044249	BP	cellular biosynthetic process	260/ 3080	576/ 8221	0.451389	0.000100368	0.005651	gene00080;gene00109;gene00264;gene00353;gene00392;gene00396;gene00505;gene00533;gene00595;gene00607;gene00640;gene00736;gene00981;gene01193;gene01289;gene01315;gene01341;gene01343;gene01365;gene01376;gene01400;gene01416;gene01423;gene01455;gene01473;gene01504;gene01518;gene01519;gene01522;gene01599;gene01609;gene01610;gene01801;gene01841;gene01890;gene01957;gene01973;gene01999;gene02003;gene02055…	RPL44;FMN1;plc;;SPT6;;;pgsA;ilvB;leuA;;;;rpmH;purL;POLR2K;RPS23;rpsO;;RPS2;thyA;;rpsF;ppnK;;sat;RPL12;;ilvH;asd;ilvD;ilvD;psd;RPO41;;;;rocD;POLR1B;;ADA2;POLR1E;;;;;RPL19;RPL32;;RPS11;;RPS27;ilvE;;guaB;;;HIR1;rpmG;;RPL35A;tmk;POLR3D;;EAP20;RPL37A;RPS27A;;RPL11;;rplW;argG;RPS24;RPL13A;POLR2G;;pheA2;;;hisA;hisA;TFG1;;TIFIA;;;;rpmA;;POLR2F;;;rpmB;cysQ;RPL34;thrC;;rplA;;ADK;rplE;;acs;;;;;glyA;RPL18A;;…
151	GO:1901566	BP	organonitrogen compound biosynthetic process	151/ 3080	315/ 8221	0.479365	0.000110728	0.00605097	gene00080;gene00109;gene00353;gene00396;gene00505;gene00595;gene00607;gene00640;gene01193;gene01289;gene01341;gene01343;gene01376;gene01400;gene01416;gene01423;gene01455;gene01473;gene01504;gene01518;gene01522;gene01599;gene01609;gene01610;gene01957;gene01973;gene01999;gene02463;gene02503;gene02506;gene02554;gene02638;gene02669;gene02691;gene02828;gene02890;gene02979;gene03248;gene03266;gene03413…	RPL44;FMN1;;;;ilvB;leuA;;rpmH;purL;RPS23;rpsO;RPS2;thyA;;rpsF;ppnK;;sat;RPL12;ilvH;asd;ilvD;ilvD;;;rocD;RPL19;RPL32;;RPS11;RPS27;ilvE;;guaB;;rpmG;RPL35A;tmk;EAP20;RPL37A;RPS27A;;RPL11;;rplW;argG;RPS24;RPL13A;pheA2;;hisA;hisA;;;;;rpmA;;;rpmB;RPL34;thrC;;rplA;;ADK;rplE;;acs;glyA;RPL18A;;hisC;lysC;;;ATP21;pdxT;RPL18;;RPL36;;pdhB;glnA;rplL;;RPL29;;;;;folE;leuB;panE;rpsK;;THI1;RPL40;aroF;ASM;ASM;RPL23…
25	GO:0016651	MF	oxidoreductase activity, acting on NAD(P)H	25/ 3080	37/ 8221	0.675676	0.00024521	0.00772884	gene00221;gene00255;gene00370;gene01541;gene01734;gene03104;gene04408;gene05828;gene06517;gene06529;gene06544;gene06573;gene07225;gene08010;gene09210;gene09231;gene09401;gene10806;gene10874;gene10939;gene11158;gene11795;gene12151;gene12227;gene12459	wrbA;;qor;;;;;;;;;;;cypD_E;cypD_E;cypD_E;wrbA;;;;;;;;
152	GO:0016798	MF	hydrolase activity, acting on glycosyl bonds	152/ 3080	323/ 8221	0.470588	0.000338083	0.0104551	gene00018;gene00065;gene00075;gene00094;gene00372;gene00560;gene00566;gene00710;gene00831;gene00913;gene01141;gene01261;gene01273;gene01399;gene01733;gene01844;gene01859;gene02051;gene02121;gene02203;gene02210;gene02398;gene02473;gene02647;gene02665;gene02686;gene02781;gene02804;gene03148;gene03184;gene03294;gene03295;gene03385;gene03425;gene03613;gene03626;gene03713;gene03735;gene03792;gene03833…	bglX;;;;galA;cbhA;;NOT1;;;;;;;;abfA;;;;bglX;;;;;;malZ;;;;;malZ;manB;xynA;;malZ;;bglX;;;;;CFT2;;;malZ;;;;;;;;manB;;;;;;xynA;abnA;;abnA;glgB;;;;;;;;;;;;;;abnA;;ASM;ASM;;;;;;;;;;;;xynA;;;;;;;;;;;;;;;abf1;;abnA;;mutY;;;;;;;;;;malZ;;;;;;;;;;;abnA;;;;;;;;;;manB;bglX;;;;;;;;;bglX
8	GO:0051920	MF	peroxiredoxin activity	8/ 3080	8/ 8221	1	0.000385955	0.0117145	gene04986;gene05444;gene05735;gene06847;gene06905;gene08231;gene09624;gene10434	pcaC;;;;;;;EST2
7	GO:0016652	MF	oxidoreductase activity, acting on NAD(P)H, NAD(P) as acceptor	7/ 3080	7/ 8221	1	0.00103164	0.0296642	gene03104;gene06529;gene06544;gene10806;gene10874;gene10939;gene12227	;;;;;;
22	GO:0044391	CC	ribosomal subunit	22/ 3080	33/ 8221	0.666667	0.000873394	0.0297578	gene01341;gene01376;gene02463;gene03474;gene03632;gene04045;gene04610;gene04613;gene05251;gene05748;gene07209;gene07639;gene07751;gene09572;gene09612;gene10293;gene10380;gene10530;gene10775;gene11199;gene11397;gene13676	RPS23;RPS2;RPL19;;RPL13A;;rplA;RPL7A;;;rpsL;RPL10A;;RPL7;RPLP2;;;RPS20;RPL26;RPS5;RPS9;RPL27A
161	GO:1901575	BP	organic substance catabolic process	161/ 3080	350/ 8221	0.46	0.000858312	0.0388962	gene00018;gene00028;gene00029;gene00065;gene00075;gene00299;gene00323;gene00343;gene00478;gene00505;gene00558;gene00560;gene00566;gene00648;gene00690;gene00710;gene00771;gene00831;gene00913;gene01188;gene01189;gene01399;gene01409;gene01690;gene01708;gene01733;gene01779;gene01844;gene01859;gene02031;gene02088;gene02110;gene02121;gene02154;gene02226;gene02665;gene02705;gene02804;gene02986;gene03148…	bglX;;;;;MOT1;;katE;VPS23;;;cbhA;;mmsB;;NOT1;pgk;;;;;;CD224;;alc;;gapA;abfA;;;;ADA2;;;;;;;;;;xynA;;;;;;;;;;;;;;;;;gabD;gabD;pgi;xynA;abnA;abnA;;gabD;;;pel;DOC1;glpK;;;;;;tpiA;;;;abnA;ASM;ASM;;;;;;;;gpmI;;;;;ALT;xynA;;;;;;;katE;SKIV2L2;;;;;abf1;;;abnA;RSP5;;rhiE;;;;;;;;fucD;;;;fbaA;;;YUH1;eno;;;;;abnA;;;;;;;;;;;bglX;;;;;;;;UCH37;;UBP6;;;gcvT
10	GO:0019843	MF	rRNA binding	10/ 3080	12/ 8221	0.833333	0.00155592	0.0439681	gene00474;gene00665;gene01423;gene03398;gene04312;gene06744;gene07087;gene07751;gene11397;gene12419	;;rpsF;;BRIX1;RPL23A;;;RPS9;
7	GO:1901657	BP	glycosyl compound metabolic process	7/ 3080	7/ 8221	1	0.00103164	0.0445765	gene00850;gene02110;gene04758;gene05748;gene07899;gene10318;gene10511	;ADA2;ADK;;mtaP;ADK;udp
7	GO:0009116	BP	nucleoside metabolic process	7/ 3080	7/ 8221	1	0.00103164	0.0445765	gene00850;gene02110;gene04758;gene05748;gene07899;gene10318;gene10511	;ADA2;ADK;;mtaP;ADK;udp
131	GO:0004553	MF	hydrolase activity, hydrolyzing O-glycosyl compounds	131/ 3080	282/ 8221	0.464539	0.00172534	0.0479294	gene00018;gene00065;gene00075;gene00372;gene00560;gene00566;gene00710;gene00831;gene00913;gene01141;gene01261;gene01399;gene01733;gene01844;gene01859;gene02051;gene02121;gene02203;gene02210;gene02398;gene02473;gene02665;gene02686;gene02781;gene02804;gene03148;gene03184;gene03294;gene03295;gene03385;gene03613;gene03626;gene03713;gene03735;gene03833;gene03987;gene04155;gene04282;gene04364;gene04497…	bglX;;;galA;cbhA;;NOT1;;;;;;;abfA;;;;bglX;;;;;malZ;;;;;malZ;manB;xynA;malZ;;bglX;;;;CFT2;;malZ;;;;;;;manB;;;;;xynA;abnA;;abnA;glgB;;;;;;;;;;;abnA;;;;;;;;;;;;;xynA;;;;;;;;;;;;abf1;;abnA;;;;;;;;;;;malZ;;;;;;;;;abnA;;;;;;;;;manB;bglX;;;;;;;;bglX
171	GO:0009056	BP	catabolic process	171/ 3080	376/ 8221	0.454787	0.00126525	0.0534279	gene00018;gene00028;gene00029;gene00065;gene00075;gene00299;gene00323;gene00343;gene00442;gene00478;gene00505;gene00558;gene00560;gene00566;gene00648;gene00690;gene00710;gene00771;gene00831;gene00913;gene01188;gene01189;gene01329;gene01399;gene01409;gene01530;gene01690;gene01708;gene01733;gene01779;gene01844;gene01859;gene02031;gene02088;gene02110;gene02121;gene02154;gene02226;gene02230;gene02665…	bglX;;;;;MOT1;;katE;;VPS23;;;cbhA;;mmsB;;NOT1;pgk;;;;;;;CD224;ATG6;;alc;;gapA;abfA;;;;ADA2;;;;;;;;;;;;xynA;;;;;;;;;;;;ATG1;;;;;;;gabD;gabD;pgi;xynA;abnA;abnA;;gabD;;;pel;DOC1;glpK;;;;;;tpiA;;;;abnA;ASM;ASM;;;;;;;;gpmI;;;;;VPS15;ALT;xynA;;;;;;;katE;SKIV2L2;;;;;abf1;;;abnA;RSP5;;rhiE;;;;;;;;;fucD;;;;fbaA;;;YUH1;eno;;;;;abnA;;;;;;;;;;;bglX;;;;;;;;;UCH37;;UBP6;;;gcvT
16	GO:0016620	MF	oxidoreductase activity, acting on the aldehyde or oxo group of donors, NAD or NADP as acceptor	16/ 3080	23/ 8221	0.695652	0.0020762	0.0548855	gene01599;gene01690;gene01779;gene03012;gene03869;gene05190;gene05226;gene05603;gene05738;gene06813;gene08526;gene09571;gene10475;gene12115;gene12663;gene13553	asd;;gapA;;;gabD;gabD;gabD;;;;;;;;
206	GO:0022857	MF	transmembrane transporter activity	206/ 3080	466/ 8221	0.44206	0.00223127	0.0566251	gene00055;gene00129;gene00232;gene00252;gene00265;gene00349;gene00355;gene00432;gene00468;gene00483;gene00606;gene00615;gene00630;gene00711;gene00728;gene00810;gene00862;gene01129;gene01130;gene01197;gene01255;gene01268;gene01305;gene01338;gene01395;gene01440;gene01453;gene01533;gene01556;gene01640;gene01659;gene01761;gene01766;gene01787;gene02000;gene02095;gene02102;gene02119;gene02198;gene02224…	;;;;;;yneE;;;;;ATP15;;;;;;;;;;;;;;;;;;;ZIP1_2_3;;;;;;;;;;;;;;;;;;;;;;;;;;;ZIP1_2_3;;;amt;;;;;;;;;;;;;CD243;;PIT;;;;;;;;norM;;norM;;;;;;;;;ATP21;;;;;;;;;;;;;ZIP1_2_3;;;;ATP6L;;;;;PIC;ATP6L;nixA;;;chaA;;;;;;;;;;;;;;;;;;chaA;chaA;;;;;;;;PMA2;;;;;;;;;;;;;;;;;;;;;;;;ATP20;;;;;;;;;;chaA;;;;;;;;;;;;ZIP7;;;;;;;;;;;
15	GO:0006066	BP	alcohol metabolic process	15/ 3080	21/ 8221	0.714286	0.00233907	0.0905416	gene01473;gene02108;gene02511;gene03006;gene03435;gene05171;gene05442;gene05941;gene05971;gene06025;gene06416;gene07225;gene07495;gene09046;gene10105	;;;;;;suhB;IHPK;frmA;glpK;THI1;;thiN;;
14	GO:0015934	CC	large ribosomal subunit	14/ 3080	20/ 8221	0.7	0.004255	0.0962445	gene02463;gene03474;gene03632;gene04045;gene04610;gene04613;gene05251;gene07639;gene09572;gene09612;gene10293;gene10380;gene10775;gene13676	RPL19;;RPL13A;;rplA;RPL7A;;RPL10A;RPL7;RPLP2;;;RPL26;RPL27A
175	GO:0044271	BP	cellular nitrogen compound biosynthetic process	175/ 3080	391/ 8221	0.44757	0.00268286	0.10173	gene00080;gene00109;gene00353;gene00392;gene00396;gene00505;gene00640;gene00981;gene01193;gene01289;gene01315;gene01341;gene01343;gene01365;gene01376;gene01400;gene01416;gene01423;gene01455;gene01473;gene01518;gene01519;gene01841;gene01890;gene02003;gene02055;gene02110;gene02201;gene02281;gene02283;gene02355;gene02463;gene02503;gene02506;gene02554;gene02605;gene02638;gene02691;gene02828;gene02840…	RPL44;FMN1;;SPT6;;;;;rpmH;purL;POLR2K;RPS23;rpsO;;RPS2;thyA;;rpsF;ppnK;;RPL12;;RPO41;;POLR1B;;ADA2;POLR1E;;;;RPL19;RPL32;;RPS11;;RPS27;;guaB;;HIR1;rpmG;;RPL35A;tmk;POLR3D;EAP20;RPL37A;RPS27A;;RPL11;rplW;RPS24;RPL13A;POLR2G;;TFG1;;TIFIA;;rpmA;;POLR2F;;rpmB;RPL34;;rplA;;ADK;rplE;acs;;RPL18A;;;ATP21;pdxT;RPL18;;;RPL36;pdhB;rplL;POLR2C;RPL29;;;;folE;;panE;rpsK;POLR2H;RAT1;uxs;TFG2;;;TFA2;;THI1;;;;;;R…
33	GO:0016616	MF	oxidoreductase activity, acting on the CH-OH group of donors, NAD or NADP as acceptor	33/ 3080	59/ 8221	0.559322	0.00430248	0.102259	gene00648;gene01690;gene01697;gene02146;gene02760;gene02785;gene02828;gene04012;gene04987;gene05416;gene05554;gene05671;gene05779;gene05855;gene05895;gene05971;gene06223;gene06361;gene07563;gene07703;gene07712;gene08552;gene08736;gene08798;gene09075;gene09076;gene09256;gene09403;gene10551;gene10571;gene10970;gene12459;gene12998	mmsB;;;;;RPN2;guaB;;mmsB;;;zwf;;leuB;panE;frmA;paaH;;gnd;fcl;ugd;ERG26;;;kduD;gutB;;;;;;;
208	GO:0005215	MF	transporter activity	208/ 3080	476/ 8221	0.436975	0.00461624	0.108086	gene00055;gene00129;gene00232;gene00252;gene00265;gene00349;gene00355;gene00432;gene00468;gene00483;gene00606;gene00615;gene00630;gene00711;gene00728;gene00810;gene00862;gene01129;gene01130;gene01197;gene01255;gene01268;gene01305;gene01338;gene01395;gene01440;gene01453;gene01533;gene01556;gene01640;gene01659;gene01761;gene01766;gene01787;gene02000;gene02095;gene02102;gene02119;gene02198;gene02224…	;;;;;;yneE;;;;;ATP15;;;;;;;;;;;;;;;;;;;ZIP1_2_3;;;;;;;;;;;;;;;;;;;;;;;;;;;ZIP1_2_3;;;amt;;;;;;;;;;;;;CD243;;PIT;;;;;;;;norM;;norM;;;;;;;;;ATP21;;;;;;;;;;;;;ZIP1_2_3;;;;ATP6L;;;;;PIC;ATP6L;nixA;;;chaA;;;;;;;;;;;;;;;;;;chaA;chaA;;;;;;;;;PMA2;;;;;;;;;;;;;;;;;;;;;;;;;ATP20;;;;;;;;;;chaA;;;;;;;;;;;;ZIP7;;;;;;;;;;;
18	GO:0016903	MF	oxidoreductase activity, acting on the aldehyde or oxo group of donors	18/ 3080	28/ 8221	0.642857	0.00521841	0.120465	gene01599;gene01690;gene01779;gene03012;gene03869;gene05190;gene05226;gene05557;gene05603;gene05738;gene06813;gene07031;gene08526;gene09571;gene10475;gene12115;gene12663;gene13553	asd;;gapA;;;gabD;gabD;pdhB;gabD;;;sucA;;;;;;
7	GO:0030145	MF	manganese ion binding	7/ 3080	8/ 8221	0.875	0.00555145	0.125278	gene01263;gene07256;gene07784;gene09926;gene09942;gene09997;gene12469	;gpmI;;;;;
40	GO:0016209	MF	antioxidant activity	40/ 3080	75/ 8221	0.533333	0.00557982	0.125278	gene00096;gene00143;gene00343;gene00468;gene00704;gene01295;gene01330;gene01845;gene02361;gene02366;gene02978;gene03226;gene04013;gene04488;gene04986;gene05444;gene05735;gene06481;gene06526;gene06670;gene06847;gene06854;gene06905;gene07101;gene07416;gene07942;gene08153;gene08168;gene08231;gene08506;gene08944;gene09624;gene10434;gene10689;gene10835;gene11161;gene11260;gene12351;gene12953;gene13970	;;katE;;;gst;;;;;mpn;;;;pcaC;;;;;;;;;trxB;;;;katE;;mpn;katE;;EST2;;;;;;;
27	GO:0006026	BP	aminoglycan catabolic process	27/ 3080	46/ 8221	0.586957	0.00355231	0.132004	gene00065;gene01399;gene02986;gene03660;gene03715;gene03987;gene04648;gene05174;gene05727;gene06172;gene06347;gene06414;gene06471;gene06787;gene06859;gene07323;gene07880;gene08364;gene08799;gene09845;gene10014;gene10478;gene10501;gene10962;gene11270;gene11670;gene13032	;;;;;;;;;;;;;;;;;;;;;;;;;;
35	GO:0004601	MF	peroxidase activity	35/ 3080	64/ 8221	0.546875	0.00604684	0.132144	gene00096;gene00143;gene00343;gene00704;gene01330;gene01845;gene02361;gene02366;gene02978;gene03226;gene04013;gene04488;gene04986;gene05444;gene05735;gene06481;gene06526;gene06670;gene06847;gene06905;gene07416;gene07942;gene08153;gene08168;gene08231;gene08506;gene08944;gene09624;gene10434;gene10689;gene10835;gene11161;gene11260;gene12953;gene13970	;;katE;;;;;;mpn;;;;pcaC;;;;;;;;;;;katE;;mpn;katE;;EST2;;;;;;
35	GO:0016684	MF	oxidoreductase activity, acting on peroxide as acceptor	35/ 3080	64/ 8221	0.546875	0.00604684	0.132144	gene00096;gene00143;gene00343;gene00704;gene01330;gene01845;gene02361;gene02366;gene02978;gene03226;gene04013;gene04488;gene04986;gene05444;gene05735;gene06481;gene06526;gene06670;gene06847;gene06905;gene07416;gene07942;gene08153;gene08168;gene08231;gene08506;gene08944;gene09624;gene10434;gene10689;gene10835;gene11161;gene11260;gene12953;gene13970	;;katE;;;;;;mpn;;;;pcaC;;;;;;;;;;;katE;;mpn;katE;;EST2;;;;;;
50	GO:0016614	MF	oxidoreductase activity, acting on CH-OH group of donors	50/ 3080	98/ 8221	0.510204	0.00622097	0.132418	gene00104;gene00105;gene00648;gene01690;gene01697;gene02146;gene02760;gene02785;gene02828;gene03103;gene03113;gene04012;gene04333;gene04987;gene05260;gene05337;gene05416;gene05554;gene05671;gene05779;gene05855;gene05895;gene05971;gene06038;gene06124;gene06223;gene06361;gene07563;gene07703;gene07712;gene08552;gene08736;gene08798;gene09075;gene09076;gene09256;gene09355;gene09403;gene09944;gene10551…	;;mmsB;;;;;RPN2;guaB;;;;;mmsB;;;;;zwf;;leuB;panE;frmA;;lldD;paaH;;gnd;fcl;ugd;ERG26;;;kduD;gutB;;;;;;;;;;;;;;;
76	GO:0044283	BP	small molecule biosynthetic process	76/ 3080	156/ 8221	0.487179	0.00437745	0.153642	gene00109;gene00505;gene00595;gene00607;gene00736;gene01473;gene01504;gene01522;gene01599;gene01609;gene01610;gene01957;gene01999;gene02511;gene02669;gene03461;gene03502;gene03547;gene03730;gene03750;gene03901;gene04004;gene04009;gene04183;gene04244;gene04448;gene04539;gene04681;gene04758;gene04797;gene05051;gene05124;gene05154;gene05280;gene05330;gene05366;gene05442;gene05554;gene05572;gene05692…	FMN1;;ilvB;leuA;;;sat;ilvH;asd;ilvD;ilvD;;rocD;;ilvE;pyc;;argG;pheA2;;;hisA;hisA;;;;thrC;;ADK;;glyA;hisC;lysC;pgi;desC;pdxT;suhB;;glnA;;;folE;leuB;panE;IHPK;;;THI1;tpiA;;;aroF;;;;;;thiN;;ugd;mtaP;;;;;desC;panB;;ADK;;aroF;;;;;
16	GO:0005615	CC	extracellular space	16/ 3080	25/ 8221	0.64	0.0112363	0.223321	gene02110;gene03545;gene03818;gene04083;gene04109;gene06383;gene09426;gene10252;gene10266;gene10267;gene10277;gene10398;gene11629;gene11648;gene12447;gene13761	ADA2;CLN2;CLN2;CLN2;CLN2;CLN2;;CLN2;CLN2;CLN2;CLN2;CLN2;;;;
22	GO:0051287	MF	NAD binding	22/ 3080	38/ 8221	0.578947	0.0113444	0.229548	gene00441;gene00648;gene01434;gene01599;gene01690;gene01779;gene02760;gene02785;gene04987;gene05416;gene05554;gene05771;gene05779;gene05855;gene05977;gene06223;gene07712;gene08526;gene10551;gene10571;gene10970;gene11035	SIR2L5;mmsB;;asd;;gapA;;RPN2;mmsB;;;;;leuB;uxs;paaH;ugd;;;;;
5	GO:0046128	BP	purine ribonucleoside metabolic process	5/ 3080	5/ 8221	1	0.00736628	0.231215	gene02110;gene04758;gene05748;gene07899;gene10318	ADA2;ADK;;mtaP;ADK
5	GO:0009119	BP	ribonucleoside metabolic process	5/ 3080	5/ 8221	1	0.00736628	0.231215	gene02110;gene04758;gene05748;gene07899;gene10318	ADA2;ADK;;mtaP;ADK
5	GO:0042278	BP	purine nucleoside metabolic process	5/ 3080	5/ 8221	1	0.00736628	0.231215	gene02110;gene04758;gene05748;gene07899;gene10318	ADA2;ADK;;mtaP;ADK
8	GO:0006096	BP	glycolytic process	8/ 3080	10/ 8221	0.8	0.00776246	0.231215	gene00771;gene01779;gene05280;gene05806;gene06429;gene07256;gene10746;gene11013	pgk;gapA;pgi;;tpiA;gpmI;fbaA;eno
26	GO:0006032	BP	chitin catabolic process	26/ 3080	45/ 8221	0.577778	0.00785832	0.231215	gene00065;gene01399;gene02986;gene03660;gene03715;gene03987;gene04648;gene05174;gene05727;gene06172;gene06347;gene06414;gene06471;gene06859;gene07323;gene07880;gene08364;gene08799;gene09845;gene10014;gene10478;gene10501;gene10962;gene11270;gene11670;gene13032	;;;;;;;;;;;;;;;;;;;;;;;;;
26	GO:0046348	BP	amino sugar catabolic process	26/ 3080	45/ 8221	0.577778	0.00785832	0.231215	gene00065;gene01399;gene02986;gene03660;gene03715;gene03987;gene04648;gene05174;gene05727;gene06172;gene06347;gene06414;gene06471;gene06859;gene07323;gene07880;gene08364;gene08799;gene09845;gene10014;gene10478;gene10501;gene10962;gene11270;gene11670;gene13032	;;;;;;;;;;;;;;;;;;;;;;;;;
26	GO:1901072	BP	glucosamine-containing compound catabolic process	26/ 3080	45/ 8221	0.577778	0.00785832	0.231215	gene00065;gene01399;gene02986;gene03660;gene03715;gene03987;gene04648;gene05174;gene05727;gene06172;gene06347;gene06414;gene06471;gene06859;gene07323;gene07880;gene08364;gene08799;gene09845;gene10014;gene10478;gene10501;gene10962;gene11270;gene11670;gene13032	;;;;;;;;;;;;;;;;;;;;;;;;;
28	GO:0006022	BP	aminoglycan metabolic process	28/ 3080	50/ 8221	0.56	0.00808879	0.231215	gene00065;gene01399;gene02986;gene03660;gene03715;gene03987;gene04164;gene04648;gene05174;gene05727;gene06172;gene06347;gene06414;gene06471;gene06787;gene06859;gene07323;gene07880;gene08364;gene08799;gene09845;gene10014;gene10478;gene10501;gene10962;gene11270;gene11670;gene13032	;;;;;;;;;;;;;;;;;;;;;;;;;;;
28	GO:1901071	BP	glucosamine-containing compound metabolic process	28/ 3080	50/ 8221	0.56	0.00808879	0.231215	gene00065;gene01399;gene02854;gene02986;gene03660;gene03715;gene03987;gene04164;gene04648;gene05174;gene05727;gene06172;gene06347;gene06414;gene06471;gene06859;gene07323;gene07880;gene08364;gene08799;gene09845;gene10014;gene10478;gene10501;gene10962;gene11270;gene11670;gene13032	;;nagB;;;;;;;;;;;;;;;;;;;;;;;;;
50	GO:0008236	MF	serine-type peptidase activity	50/ 3080	101/ 8221	0.49505	0.0130683	0.252772	gene00019;gene00304;gene01140;gene01229;gene01497;gene01782;gene01786;gene02305;gene02780;gene02872;gene02877;gene03135;gene03545;gene03784;gene03818;gene04083;gene04109;gene04726;gene05417;gene05420;gene06117;gene06383;gene06589;gene06600;gene06975;gene07210;gene07355;gene07711;gene08512;gene08518;gene09074;gene09143;gene09151;gene09232;gene09431;gene10252;gene10266;gene10267;gene10277;gene10398…	;;;;;;;;;;;;CLN2;;CLN2;CLN2;CLN2;;;;;CLN2;;;;;;;;;;;;;;CLN2;CLN2;CLN2;CLN2;CLN2;;;;;;;;;;
50	GO:0017171	MF	serine hydrolase activity	50/ 3080	101/ 8221	0.49505	0.0130683	0.252772	gene00019;gene00304;gene01140;gene01229;gene01497;gene01782;gene01786;gene02305;gene02780;gene02872;gene02877;gene03135;gene03545;gene03784;gene03818;gene04083;gene04109;gene04726;gene05417;gene05420;gene06117;gene06383;gene06589;gene06600;gene06975;gene07210;gene07355;gene07711;gene08512;gene08518;gene09074;gene09143;gene09151;gene09232;gene09431;gene10252;gene10266;gene10267;gene10277;gene10398…	;;;;;;;;;;;;CLN2;;CLN2;CLN2;CLN2;;;;;CLN2;;;;;;;;;;;;;;CLN2;CLN2;CLN2;CLN2;CLN2;;;;;;;;;;
6	GO:0016538	MF	cyclin-dependent protein serine/threonine kinase regulator activity	6/ 3080	7/ 8221	0.857143	0.013109	0.252772	gene00650;gene00861;gene02200;gene05334;gene07811;gene11596	;;;;SSN8;
6	GO:0016682	MF	oxidoreductase activity, acting on diphenols and related substances as donors, oxygen as acceptor	6/ 3080	7/ 8221	0.857143	0.013109	0.252772	gene01732;gene07198;gene10778;gene10938;gene11642;gene12403	;;;;;
29	GO:1901136	BP	carbohydrate derivative catabolic process	29/ 3080	52/ 8221	0.557692	0.00901525	0.253793	gene00065;gene00075;gene01399;gene02110;gene02986;gene03660;gene03715;gene03987;gene04648;gene05174;gene05727;gene06172;gene06347;gene06414;gene06471;gene06787;gene06859;gene07323;gene07880;gene08364;gene08799;gene09845;gene10014;gene10478;gene10501;gene10962;gene11270;gene11670;gene13032	;;;ADA2;;;;;;;;;;;;;;;;;;;;;;;;;
74	GO:1901565	BP	organonitrogen compound catabolic process	74/ 3080	155/ 8221	0.477419	0.0092272	0.255883	gene00028;gene00029;gene00065;gene00505;gene00648;gene01188;gene01189;gene01399;gene01708;gene02031;gene02088;gene02110;gene02226;gene02705;gene02986;gene03414;gene03660;gene03669;gene03715;gene03869;gene03987;gene04648;gene05174;gene05190;gene05226;gene05601;gene05603;gene05727;gene05903;gene06172;gene06347;gene06414;gene06442;gene06471;gene06538;gene06665;gene06668;gene06787;gene06859;gene06895…	;;;;mmsB;;;;alc;;;ADA2;;;;;;;;;;;;gabD;gabD;;gabD;;DOC1;;;;;;;ASM;ASM;;;;;;ALT;;;;;;;;;;;fucD;;;;;;;;;;;;;;;;;UBP6;;;gcvT
76	GO:0016829	MF	lyase activity	76/ 3080	162/ 8221	0.469136	0.0137907	0.262826	gene00138;gene00640;gene01232;gene01272;gene01448;gene01609;gene01610;gene01708;gene01801;gene01842;gene02084;gene02121;gene02210;gene02437;gene02628;gene03413;gene03434;gene03713;gene03730;gene04266;gene04517;gene04539;gene04587;gene04771;gene04799;gene04879;gene04953;gene05116;gene05206;gene05241;gene05314;gene05346;gene05370;gene05387;gene05414;gene05426;gene05622;gene05692;gene05812;gene05977…	;;;;;ilvD;ilvD;alc;psd;psd;;;;cynT;ltaE;EAP20;;bglX;pheA2;;cynT;thrC;;pdc;pdc;;;gadB;;;;;;;;;;;pel;uxs;;;;;;;purB;aceA;;hemE;;;;;;;xfp;rhiE;;;;fucD;fbaA;;eno;;;;psd;;;;;;;
38	GO:0065003	BP	protein-containing complex assembly	38/ 3080	72/ 8221	0.527778	0.00973286	0.26389	gene00346;gene00442;gene00751;gene00813;gene01910;gene01961;gene02762;gene02908;gene03023;gene03501;gene03675;gene03940;gene03977;gene04139;gene04461;gene04640;gene04665;gene05238;gene05607;gene05730;gene05756;gene05839;gene05863;gene05867;gene05909;gene06410;gene06675;gene06732;gene07087;gene07561;gene07597;gene07724;gene07765;gene08161;gene08164;gene09413;gene11497;gene11593	;;;XMAP215;;;;;NRP;;;;;;GLTSCR2;;INT6;;;;;;;tfb;;PAC3;;;;;;;;;;;;
52	GO:0043933	BP	protein-containing complex organization	52/ 3080	104/ 8221	0.5	0.0104604	0.266239	gene00346;gene00442;gene00751;gene00813;gene01490;gene01910;gene01961;gene02762;gene02840;gene02901;gene02908;gene03023;gene03501;gene03675;gene03940;gene03977;gene04139;gene04407;gene04426;gene04461;gene04533;gene04542;gene04640;gene04665;gene04801;gene04875;gene05238;gene05607;gene05730;gene05756;gene05839;gene05863;gene05867;gene05909;gene06410;gene06675;gene06725;gene06732;gene07087;gene07561…	;;;XMAP215;;;;;;HIR1;;NRP;;;;;;INO80J;EAF4;GLTSCR2;;;;INT6;SPT5;;;;;;;;tfb;;PAC3;;SUS1;;;;;;;;;;;;;TEL1;EAF3;TEL1
10	GO:0006090	BP	pyruvate metabolic process	10/ 3080	14/ 8221	0.714286	0.0117893	0.288132	gene00771;gene01779;gene03461;gene05280;gene05557;gene05806;gene06429;gene07256;gene10746;gene11013	pgk;gapA;pyc;pgi;pdhB;;tpiA;gpmI;fbaA;eno
27	GO:0006030	BP	chitin metabolic process	27/ 3080	49/ 8221	0.55102	0.0119409	0.288132	gene00065;gene01399;gene02986;gene03660;gene03715;gene03987;gene04164;gene04648;gene05174;gene05727;gene06172;gene06347;gene06414;gene06471;gene06859;gene07323;gene07880;gene08364;gene08799;gene09845;gene10014;gene10478;gene10501;gene10962;gene11270;gene11670;gene13032	;;;;;;;;;;;;;;;;;;;;;;;;;;
6	GO:0019751	BP	polyol metabolic process	6/ 3080	7/ 8221	0.857143	0.013109	0.312262	gene02511;gene03435;gene05442;gene05941;gene06025;gene09046	;;suhB;IHPK;glpK;
39	GO:0030247	MF	polysaccharide binding	39/ 3080	76/ 8221	0.513158	0.0166623	0.313902	gene00560;gene00566;gene00913;gene01733;gene01953;gene01964;gene02665;gene03018;gene03148;gene03385;gene03626;gene03713;gene03735;gene04282;gene04584;gene05393;gene05981;gene07085;gene07100;gene07738;gene07745;gene08114;gene08117;gene08133;gene08485;gene08902;gene08981;gene09000;gene09001;gene09342;gene09355;gene09465;gene09896;gene10567;gene10754;gene11440;gene11713;gene13686;gene14115	cbhA;;;;;;;;;xynA;;bglX;;;;xynA;;;;xynA;;;;;;;;;;;;;;;;;;;
194	GO:0044281	BP	small molecule metabolic process	194/ 3080	452/ 8221	0.429204	0.0143329	0.332881	gene00028;gene00029;gene00109;gene00138;gene00267;gene00505;gene00587;gene00595;gene00607;gene00648;gene00690;gene00736;gene00738;gene00771;gene00850;gene01289;gene01400;gene01448;gene01455;gene01473;gene01504;gene01522;gene01548;gene01599;gene01609;gene01610;gene01690;gene01708;gene01779;gene01844;gene01945;gene01957;gene01999;gene02031;gene02086;gene02108;gene02110;gene02146;gene02511;gene02605…	;;FMN1;;trpS;;bkdA2;ilvB;leuA;mmsB;;;;pgk;;purL;thyA;;ppnK;;sat;ilvH;;asd;ilvD;ilvD;;alc;gapA;abfA;leuS;;rocD;;;;ADA2;;;;ltaE;ilvE;;;guaB;;;ACH1;;tmk;;;pyc;;argG;pheA2;;;;;hisA;hisA;;;;;thrC;;;ADK;;acs;glyA;gadB;hisC;lysC;;gabD;gabD;pgi;ahcY;;desC;ileS;ATP21;pdxT;galE;suhB;;;;pdhB;glnA;gabD;zwf;;;;folE;;leuB;panE;IHPK;;frmA;;uxs;glpK;;paaH;xylB;metB;;THI1;tpiA;;;;;;aroF;;;;;;;;purB;;;gpmI;;;;thiN…
4	GO:0004061	MF	arylformamidase activity	4/ 3080	4/ 8221	1	0.0196777	0.350563	gene00028;gene00029;gene02031;gene06895	;;;
4	GO:0005092	MF	GDP-dissociation inhibitor activity	4/ 3080	4/ 8221	1	0.0196777	0.350563	gene05884;gene05973;gene07534;gene07762	RHOGDI;;;
4	GO:2001070	MF	starch binding	4/ 3080	4/ 8221	1	0.0196777	0.350563	gene04584;gene08114;gene10567;gene10754	;;;
4	GO:0016742	MF	hydroxymethyl-, formyl- and related transferase activity	4/ 3080	4/ 8221	1	0.0196777	0.350563	gene05051;gene09550;gene10094;gene13108	glyA;purH;panB;gcvT
4	GO:0000172	CC	ribonuclease MRP complex	4/ 3080	4/ 8221	1	0.0196777	0.361011	gene00296;gene00474;gene07498;gene12234	;;;RPP29
7	GO:0000075	BP	cell cycle checkpoint signaling	7/ 3080	9/ 8221	0.777778	0.0168661	0.365612	gene00380;gene02693;gene03877;gene08368;gene10460;gene12116;gene13256	SWI3;;;;;;
110	GO:0009057	BP	macromolecule catabolic process	110/ 3080	246/ 8221	0.447154	0.0191428	0.365612	gene00018;gene00065;gene00299;gene00323;gene00478;gene00558;gene00560;gene00566;gene00831;gene00913;gene01188;gene01189;gene01399;gene01733;gene01844;gene01859;gene02088;gene02121;gene02154;gene02226;gene02665;gene02705;gene02804;gene02986;gene03148;gene03203;gene03385;gene03414;gene03626;gene03660;gene03669;gene03715;gene03735;gene03987;gene04497;gene04584;gene04648;gene04953;gene05174;gene05184…	bglX;;MOT1;;VPS23;;cbhA;;;;;;;;abfA;;;;;;;;;;;;xynA;;;;;;;;;;;;;;xynA;abnA;abnA;;;pel;DOC1;;;;;;abnA;;;;;;xynA;;;;;;SKIV2L2;;;;abf1;abnA;RSP5;;rhiE;;;;;;;;;;;;;YUH1;;;abnA;;;;;;;;;;bglX;;;;;;;;UCH37;;UBP6;
30	GO:0006040	BP	amino sugar metabolic process	30/ 3080	57/ 8221	0.526316	0.019677	0.365612	gene00065;gene01399;gene02605;gene02854;gene02986;gene03660;gene03715;gene03987;gene04164;gene04648;gene05174;gene05727;gene05829;gene06172;gene06347;gene06414;gene06471;gene06859;gene07323;gene07880;gene08364;gene08799;gene09845;gene10014;gene10478;gene10501;gene10962;gene11270;gene11670;gene13032	;;;nagB;;;;;;;;;;;;;;;;;;;;;;;;;;
4	GO:0006749	BP	glutathione metabolic process	4/ 3080	4/ 8221	1	0.0196777	0.365612	gene00468;gene01409;gene01416;gene06726	;CD224;;
4	GO:0009163	BP	nucleoside biosynthetic process	4/ 3080	4/ 8221	1	0.0196777	0.365612	gene04758;gene05748;gene07899;gene10318	ADK;;mtaP;ADK
4	GO:0007093	BP	mitotic cell cycle checkpoint signaling	4/ 3080	4/ 8221	1	0.0196777	0.365612	gene02693;gene03877;gene08368;gene10460	;;;
4	GO:0051274	BP	beta-glucan biosynthetic process	4/ 3080	4/ 8221	1	0.0196777	0.365612	gene04415;gene09167;gene09171;gene12724	;;;
4	GO:1901659	BP	glycosyl compound biosynthetic process	4/ 3080	4/ 8221	1	0.0196777	0.365612	gene04758;gene05748;gene07899;gene10318	ADK;;mtaP;ADK
4	GO:0034404	BP	nucleobase-containing small molecule biosynthetic process	4/ 3080	4/ 8221	1	0.0196777	0.365612	gene04758;gene05748;gene07899;gene10318	ADK;;mtaP;ADK
4	GO:0009098	BP	leucine biosynthetic process	4/ 3080	4/ 8221	1	0.0196777	0.365612	gene00607;gene05692;gene05855;gene12201	leuA;;leuB;
4	GO:0042451	BP	purine nucleoside biosynthetic process	4/ 3080	4/ 8221	1	0.0196777	0.365612	gene04758;gene05748;gene07899;gene10318	ADK;;mtaP;ADK
4	GO:0033044	BP	regulation of chromosome organization	4/ 3080	4/ 8221	1	0.0196777	0.365612	gene02693;gene02848;gene08368;gene10460	;;;
4	GO:0043174	BP	nucleoside salvage	4/ 3080	4/ 8221	1	0.0196777	0.365612	gene04758;gene05748;gene07899;gene10318	ADK;;mtaP;ADK
4	GO:0042455	BP	ribonucleoside biosynthetic process	4/ 3080	4/ 8221	1	0.0196777	0.365612	gene04758;gene05748;gene07899;gene10318	ADK;;mtaP;ADK
4	GO:0046129	BP	purine ribonucleoside biosynthetic process	4/ 3080	4/ 8221	1	0.0196777	0.365612	gene04758;gene05748;gene07899;gene10318	ADK;;mtaP;ADK
4	GO:0006166	BP	purine ribonucleoside salvage	4/ 3080	4/ 8221	1	0.0196777	0.365612	gene04758;gene05748;gene07899;gene10318	ADK;;mtaP;ADK
415	GO:1901564	BP	organonitrogen compound metabolic process	415/ 3080	1017/ 8221	0.408063	0.0203915	0.375122	gene00019;gene00028;gene00029;gene00065;gene00080;gene00109;gene00138;gene00264;gene00267;gene00268;gene00310;gene00353;gene00396;gene00428;gene00478;gene00505;gene00551;gene00587;gene00595;gene00607;gene00620;gene00640;gene00648;gene00684;gene00811;gene00850;gene00979;gene01140;gene01172;gene01188;gene01189;gene01193;gene01214;gene01215;gene01229;gene01263;gene01289;gene01341;gene01343;gene01370…	;;;;RPL44;FMN1;;plc;trpS;;;;;;VPS23;;ide;bkdA2;ilvB;leuA;UBP3;;mmsB;;map;;;;;;;rpmH;;;;;purL;RPS23;rpsO;;RPS2;;thyA;;rpsF;ARF-BP1;ppnK;;;sat;RPL12;ilvH;asd;ilvD;ilvD;;;alc;;;;psd;leuS;;;rocD;;;;ADA2;;;;RPL19;;RPL32;;RPS11;ltaE;RPS27;ilvE;;SPC3;;;CHP60;;guaB;;;;;;;rpmG;;;;;;;amzA;;RPL35A;tmk;;;EAP20;;RPL37A;RPS27A;;RPL11;;rplW;CLN2;argG;RPS24;RPL13A;;;lipB;;pheA2;;;;CLN2;;;lplA;;hisA;hisA;;metX;CL…
45	GO:0022607	BP	cellular component assembly	45/ 3080	91/ 8221	0.494505	0.0217497	0.396186	gene00346;gene00442;gene00751;gene00813;gene01910;gene01961;gene02733;gene02762;gene02908;gene03023;gene03501;gene03675;gene03940;gene03977;gene04139;gene04314;gene04461;gene04640;gene04665;gene05221;gene05238;gene05607;gene05730;gene05756;gene05839;gene05863;gene05867;gene05909;gene06410;gene06675;gene06732;gene06845;gene07087;gene07561;gene07597;gene07724;gene07765;gene08161;gene08164;gene08428…	;;;XMAP215;;;;;;NRP;;;;;;;GLTSCR2;;INT6;;;;;;;;tfb;;PAC3;;;;;;;;;;;mrp;;;;;
9	GO:0006367	BP	transcription initiation at RNA polymerase II promoter	9/ 3080	13/ 8221	0.692308	0.0225422	0.406634	gene04019;gene06035;gene06271;gene06672;gene08684;gene10553;gene10719;gene10802;gene13186	TFG1;TFG2;TFA2;;;XPB;tfe;;XPB
11	GO:0009081	BP	branched-chain amino acid metabolic process	11/ 3080	17/ 8221	0.647059	0.0245686	0.434748	gene00595;gene00607;gene00648;gene01522;gene01609;gene01610;gene02669;gene05692;gene05855;gene08798;gene12201	ilvB;leuA;mmsB;ilvH;ilvD;ilvD;ilvE;;leuB;;
16	GO:0016831	MF	carboxy-lyase activity	16/ 3080	27/ 8221	0.592593	0.0268181	0.457863	gene00138;gene01448;gene01801;gene01842;gene04771;gene04799;gene05116;gene05977;gene06209;gene07634;gene07754;gene11284;gene12222;gene12733;gene13441;gene13444	;;psd;psd;pdc;pdc;gadB;uxs;;;hemE;;psd;;;
16	GO:0019748	BP	secondary metabolic process	16/ 3080	27/ 8221	0.592593	0.0268181	0.470076	gene02701;gene04973;gene04977;gene04978;gene07023;gene07807;gene07808;gene08535;gene08558;gene08618;gene09825;gene11704;gene12459;gene13088;gene13612;gene13622	;;;;;;;;;;;;;;;
33	GO:0008238	MF	exopeptidase activity	33/ 3080	65/ 8221	0.507692	0.0288547	0.47831	gene00428;gene00680;gene00811;gene01263;gene01497;gene01645;gene02877;gene02962;gene02964;gene03135;gene03136;gene03403;gene04726;gene05069;gene05933;gene06193;gene06600;gene07355;gene07711;gene07717;gene07784;gene08512;gene08518;gene09143;gene09151;gene09454;gene11341;gene12230;gene12299;gene12469;gene12731;gene12927;gene13617	;;map;;;;;;;;;;;;pip;;;;;;;;;;;;;;;;;;
14	GO:0044550	BP	secondary metabolite biosynthetic process	14/ 3080	23/ 8221	0.608696	0.0289753	0.478872	gene04973;gene04977;gene04978;gene07023;gene07807;gene07808;gene08535;gene08618;gene09825;gene11704;gene12459;gene13088;gene13612;gene13622	;;;;;;;;;;;;;
10	GO:0016998	BP	cell wall macromolecule catabolic process	10/ 3080	15/ 8221	0.666667	0.0294813	0.478872	gene00831;gene01859;gene02804;gene03385;gene04497;gene05393;gene06787;gene07738;gene08800;gene09465	;;;xynA;;xynA;;xynA;abf1;
10	GO:0044036	BP	cell wall macromolecule metabolic process	10/ 3080	15/ 8221	0.666667	0.0294813	0.478872	gene00831;gene01859;gene02804;gene03385;gene04497;gene05393;gene06787;gene07738;gene08800;gene09465	;;;xynA;;xynA;;xynA;abf1;
10	GO:0009082	BP	branched-chain amino acid biosynthetic process	10/ 3080	15/ 8221	0.666667	0.0294813	0.478872	gene00595;gene00607;gene01522;gene01609;gene01610;gene02669;gene05692;gene05855;gene08798;gene12201	ilvB;leuA;ilvH;ilvD;ilvD;ilvE;;leuB;;
12	GO:1903047	BP	mitotic cell cycle process	12/ 3080	19/ 8221	0.631579	0.0302146	0.478872	gene00570;gene02693;gene03528;gene03672;gene03877;gene05334;gene06772;gene07436;gene08368;gene08753;gene10460;gene11596	LIS1;;;;;;NIPBL;;;CAPD2;;
5	GO:0034308	BP	primary alcohol metabolic process	5/ 3080	6/ 8221	0.833333	0.0304128	0.478872	gene01473;gene03006;gene05971;gene06416;gene07495	;;frmA;THI1;thiN
5	GO:0000271	BP	polysaccharide biosynthetic process	5/ 3080	6/ 8221	0.833333	0.0304128	0.478872	gene04415;gene05721;gene09167;gene09171;gene12724	;glgB;;;
5	GO:0009250	BP	glucan biosynthetic process	5/ 3080	6/ 8221	0.833333	0.0304128	0.478872	gene04415;gene05721;gene09167;gene09171;gene12724	;glgB;;;
5	GO:0009088	BP	threonine biosynthetic process	5/ 3080	6/ 8221	0.833333	0.0304128	0.478872	gene01599;gene01957;gene03502;gene04539;gene08798	asd;;;thrC;
5	GO:0006566	BP	threonine metabolic process	5/ 3080	6/ 8221	0.833333	0.0304128	0.478872	gene01599;gene01957;gene03502;gene04539;gene08798	asd;;;thrC;
5	GO:0043605	BP	amide catabolic process	5/ 3080	6/ 8221	0.833333	0.0304128	0.478872	gene01708;gene03869;gene07049;gene08009;gene11114	alc;;;;
31	GO:0032787	BP	monocarboxylic acid metabolic process	31/ 3080	60/ 8221	0.516667	0.031267	0.486999	gene00505;gene00771;gene01690;gene01779;gene03190;gene03461;gene04448;gene04703;gene04878;gene05190;gene05226;gene05280;gene05330;gene05557;gene05603;gene05806;gene05895;gene06223;gene06429;gene07256;gene07454;gene07476;gene07563;gene08618;gene09427;gene10094;gene10746;gene11013;gene11535;gene11550;gene12473	;pgk;;gapA;ACH1;pyc;;;acs;gabD;gabD;pgi;desC;pdhB;gabD;;panE;paaH;tpiA;gpmI;;;gnd;;desC;panB;fbaA;eno;;;aceB
5	GO:0046558	MF	arabinan endo-1,5-alpha-L-arabinosidase activity	5/ 3080	6/ 8221	0.833333	0.0304128	0.48744	gene05432;gene05542;gene06612;gene09161;gene11128	abnA;abnA;abnA;abnA;abnA
5	GO:0052716	MF	hydroquinone:oxygen oxidoreductase activity	5/ 3080	6/ 8221	0.833333	0.0304128	0.48744	gene01732;gene10778;gene10938;gene11642;gene12403	;;;;
19	GO:0004568	MF	chitinase activity	19/ 3080	34/ 8221	0.558824	0.0324284	0.501417	gene00065;gene01399;gene03987;gene04648;gene05174;gene05727;gene06172;gene06347;gene06414;gene06471;gene07323;gene07880;gene08364;gene08799;gene09845;gene10478;gene10501;gene11670;gene13032	;;;;;;;;;;;;;;;;;;
12	GO:0000786	CC	nucleosome	12/ 3080	19/ 8221	0.631579	0.0302146	0.50833	gene03202;gene03209;gene03307;gene04640;gene05582;gene08748;gene08779;gene10941;gene10968;gene11047;gene11859;gene11860	;;;;;;;;;;;
20	GO:0051273	BP	beta-glucan metabolic process	20/ 3080	37/ 8221	0.540541	0.0414459	0.542484	gene00018;gene00560;gene00566;gene00913;gene01733;gene02665;gene03148;gene03626;gene03735;gene04415;gene07460;gene07745;gene08117;gene08133;gene09167;gene09171;gene09896;gene11713;gene12001;gene12724	bglX;cbhA;;;;;;;;;;;;;;;;;bglX;
15	GO:0006352	BP	DNA-templated transcription initiation	15/ 3080	26/ 8221	0.576923	0.0414739	0.542484	gene01365;gene02055;gene03692;gene04019;gene04103;gene06035;gene06271;gene06672;gene07009;gene08684;gene10553;gene10719;gene10802;gene11645;gene13186	;;POLR2G;TFG1;TIFIA;TFG2;TFA2;;;;XPB;tfe;;;XPB
74	GO:1901135	BP	carbohydrate derivative metabolic process	74/ 3080	164/ 8221	0.45122	0.0419394	0.542484	gene00065;gene00075;gene00109;gene00738;gene00850;gene01289;gene01399;gene01400;gene02108;gene02110;gene02605;gene02828;gene02854;gene02971;gene02986;gene03266;gene03406;gene03660;gene03715;gene03987;gene04164;gene04648;gene04758;gene04878;gene05171;gene05174;gene05280;gene05314;gene05362;gene05481;gene05557;gene05671;gene05727;gene05748;gene05829;gene05977;gene06025;gene06172;gene06347;gene06414…	;;FMN1;;;purL;;thyA;;ADA2;;guaB;nagB;;;tmk;;;;;;;ADK;acs;;;pgi;;ATP21;;pdhB;zwf;;;;uxs;glpK;;;;;;;;;;purB;;gnd;fcl;ugd;;mtaP;;;;;pyrD;purH;;;ADK;;;udp;ATP20;talA;;;;;galU;galU;galU
27	GO:0044282	BP	small molecule catabolic process	27/ 3080	53/ 8221	0.509434	0.0465032	0.542484	gene00028;gene00029;gene00505;gene00648;gene01690;gene02031;gene02110;gene03435;gene03869;gene05190;gene05226;gene05603;gene06025;gene06442;gene06895;gene07049;gene07256;gene07454;gene07476;gene07719;gene08009;gene08618;gene09046;gene10336;gene11535;gene13005;gene13108	;;;mmsB;;;ADA2;;;gabD;gabD;gabD;glpK;;;;gpmI;;;ALT;;;;fucD;;;gcvT
7	GO:1901988	BP	negative regulation of cell cycle phase transition	7/ 3080	10/ 8221	0.7	0.0472239	0.542484	gene00380;gene02693;gene03877;gene08368;gene10460;gene12116;gene13256	SWI3;;;;;;
7	GO:0031221	BP	arabinan metabolic process	7/ 3080	10/ 8221	0.7	0.0472239	0.542484	gene01844;gene05432;gene05542;gene06612;gene08800;gene09161;gene11128	abfA;abnA;abnA;abnA;abf1;abnA;abnA
7	GO:0010948	BP	negative regulation of cell cycle process	7/ 3080	10/ 8221	0.7	0.0472239	0.542484	gene00380;gene02693;gene03877;gene08368;gene10460;gene12116;gene13256	SWI3;;;;;;
7	GO:0006739	BP	NADP metabolic process	7/ 3080	10/ 8221	0.7	0.0472239	0.542484	gene01455;gene02971;gene05671;gene07563;gene09054;gene09055;gene10837	ppnK;;zwf;gnd;ppnK;ppnK;talA
7	GO:0046165	BP	alcohol biosynthetic process	7/ 3080	10/ 8221	0.7	0.0472239	0.542484	gene01473;gene02511;gene05442;gene05941;gene06416;gene07225;gene10105	;;suhB;IHPK;THI1;;
7	GO:0031222	BP	arabinan catabolic process	7/ 3080	10/ 8221	0.7	0.0472239	0.542484	gene01844;gene05432;gene05542;gene06612;gene08800;gene09161;gene11128	abfA;abnA;abnA;abnA;abf1;abnA;abnA
7	GO:0033108	BP	mitochondrial respiratory chain complex assembly	7/ 3080	10/ 8221	0.7	0.0472239	0.542484	gene00346;gene03977;gene05607;gene05839;gene06732;gene07724;gene11593	;;;;;;
7	GO:0045786	BP	negative regulation of cell cycle	7/ 3080	10/ 8221	0.7	0.0472239	0.542484	gene00380;gene02693;gene03877;gene08368;gene10460;gene12116;gene13256	SWI3;;;;;;
111	GO:0019752	BP	carboxylic acid metabolic process	111/ 3080	256/ 8221	0.433594	0.0492542	0.542484	gene00028;gene00029;gene00138;gene00267;gene00505;gene00595;gene00607;gene00648;gene00771;gene01289;gene01448;gene01504;gene01522;gene01599;gene01609;gene01610;gene01690;gene01779;gene01945;gene01957;gene01999;gene02031;gene02146;gene02628;gene02669;gene02673;gene03190;gene03235;gene03461;gene03502;gene03547;gene03730;gene03750;gene03869;gene04004;gene04009;gene04135;gene04183;gene04244;gene04448…	;;;trpS;;ilvB;leuA;mmsB;pgk;purL;;sat;ilvH;asd;ilvD;ilvD;;gapA;leuS;;rocD;;;ltaE;ilvE;;ACH1;;pyc;;argG;pheA2;;;hisA;hisA;;;;;thrC;;;acs;glyA;gadB;hisC;lysC;gabD;gabD;pgi;;desC;ileS;pdxT;;pdhB;glnA;gabD;;;folE;leuB;panE;;paaH;metB;tpiA;;aroF;;;;;gpmI;;;aceA;gnd;;ugd;ALT;mtaP;guaA;;;;;;;desC;;;panB;argS;fucD;;fbaA;aroF;;eno;;;;;;;aceB;;;gcvT
112	GO:0043436	BP	oxoacid metabolic process	112/ 3080	258/ 8221	0.434109	0.0498	0.542484	gene00028;gene00029;gene00138;gene00267;gene00505;gene00595;gene00607;gene00648;gene00771;gene01289;gene01448;gene01504;gene01522;gene01548;gene01599;gene01609;gene01610;gene01690;gene01779;gene01945;gene01957;gene01999;gene02031;gene02146;gene02628;gene02669;gene02673;gene03190;gene03235;gene03461;gene03502;gene03547;gene03730;gene03750;gene03869;gene04004;gene04009;gene04135;gene04183;gene04244…	;;;trpS;;ilvB;leuA;mmsB;pgk;purL;;sat;ilvH;;asd;ilvD;ilvD;;gapA;leuS;;rocD;;;ltaE;ilvE;;ACH1;;pyc;;argG;pheA2;;;hisA;hisA;;;;;thrC;;;acs;glyA;gadB;hisC;lysC;gabD;gabD;pgi;;desC;ileS;pdxT;;pdhB;glnA;gabD;;;folE;leuB;panE;;paaH;metB;tpiA;;aroF;;;;;gpmI;;;aceA;gnd;;ugd;ALT;mtaP;guaA;;;;;;;desC;;;panB;argS;fucD;;fbaA;aroF;;eno;;;;;;;aceB;;;gcvT
15	GO:0008061	MF	chitin binding	15/ 3080	26/ 8221	0.576923	0.0414739	0.591093	gene00065;gene01399;gene02781;gene03987;gene05174;gene05727;gene06172;gene06347;gene06471;gene07880;gene08364;gene08799;gene10501;gene11670;gene13032	;;;;;;;;;;;;;;
47	GO:0016853	MF	isomerase activity	47/ 3080	99/ 8221	0.474747	0.0466549	0.652557	gene00467;gene02511;gene02560;gene02605;gene02745;gene02854;gene03027;gene03036;gene03150;gene03183;gene03226;gene03513;gene03730;gene03810;gene03811;gene03892;gene04004;gene04009;gene04348;gene04639;gene04926;gene05077;gene05280;gene05398;gene05559;gene06129;gene06322;gene06361;gene06429;gene07062;gene07256;gene07630;gene09159;gene09342;gene09428;gene09893;gene10154;gene10167;gene10467;gene11061…	;;;;CHP60;nagB;;;pgm;TXNDC7;;;pheA2;;;;hisA;hisA;;;;;pgi;galE;P4HB;;;;tpiA;;gpmI;CBF5;CYPD;;;;;;;;;TXNDC7;CYPH;;;;ppiB
11	GO:0030527	MF	structural constituent of chromatin	11/ 3080	18/ 8221	0.611111	0.0497542	0.652557	gene03202;gene03209;gene03307;gene05582;gene08748;gene08779;gene10941;gene10968;gene11047;gene11859;gene11860	;;;;;;;;;;
