# Supplementary material for: Transcriptomic, and metabolic profiling reveals adaptive mechanisms of Auricularia heimuer to temperature stress
Source: PeerJ. 2025 Jul 21;13:e19713. doi: 10.7717/peerj.19713 (PMC12288747; doi:10.7717/peerj.19713)
Supplement: Supplemental Information 10 [file peerj-13-19713-s010.xlsx]

## Sheet: Fig 1B raw data
Growth rate of A. heimuer mycelia on PDA under different temperatures
15℃	25℃	35℃	45℃
7.75	30.4	41.81	0
6.53	28.24	45.34	0
8.47	29.45	45.87	0
8.17	26.66	45.02	0
9.83	23.86	44.63	0
7.8	26.09	45.17	0
10.27	27.48	43.86	0
4.42	24.99	42.23	0
8.26	26.37	42.18	0
8.28	30.59	46.51	0
8.07	27.56	44.26	0
6.7	25.78	40.69	0
7.78	28.46	44.25	0
10.62	24.84	44.81	0
11.82	28.15	43.62	0
9.64	28.46	42.54	0
8.45	27.44	45.19	0
7.42	24.48	44.2	0
10.03	24.65	47.62	0
9.13	26.09	43.52	0
8.72	27.35	43.53	0
4.28	27.97	40.55	0
9	29.9	43.68	0
6.44	27.58	42.77	0
7.95	28.14	45.83	0
6.2	28.05	42.01	0
8.89	26.36	45.38	0
9.37	27.77	47.15	0
8.32	27.47	43.09	0
9.67	29.33	42.07	0
8.29	28.83	43.94	0
7.53	26.87	45.78	0
8.09	26.19	43.43	0
9.54	26.2	46.54	0
8.17	26.91	46.91	0
6	26.92	47.08	0
6.73	30.06	46.19	0
5.78	27.14	44.59	0
9.54	27.99	45.87	0
8.55	29.4	41.83	0
11.32	24.48	45.44	0
8.31	27.25	44.85	0
6.9	29.32	43.27	0
8.47	27.62	48.15	0
8.74	28.26	45.33	0
7.87	26.2	46.82	0
5.94	26.5	44.31	0
11	26.05	45.32	0
8.47	27.43	44.77	0
5.21	26.08	38.9	0
7.12	30.1	42.44	0
6.37	28.66	42.62	0
5.84	29.7	43.24	0
6.25	27.72	41.87	0
8.8	27.47	43.56	0
8.38	26.68	44.18	0

## Sheet: Fig 1C raw data
Fresh weight of A. heimuer mycelia on PDA under different temperatures
15℃	25℃	35℃	45℃
0.078	0.099	0.168	0.056
0.081	0.103	0.15	0.056
0.066	0.107	0.17	0.066
0.091	0.11	0.189	0.061
0.087	0.091	0.139	0.07
0.085	0.098	0.135	0.061
0.067	0.08
	0.103
