# Supplementary material for: Transcriptomic, and metabolic profiling reveals adaptive mechanisms of Auricularia heimuer to temperature stress
Source: PeerJ. 2025 Jul 21;13:e19713. doi: 10.7717/peerj.19713 (PMC12288747; doi:10.7717/peerj.19713)
Supplement: Supplemental Information 11 [file peerj-13-19713-s011.xlsx]

## Sheet: Sheet1
Supplemental Table Fig 9. raw data
Sample number	Sucrose content（mg/g）	Glucose content（mg/g）	Fructose content（mg/g）	Fructose-1, 6-diphosphate (FDP) content （µg/g）	Pyruvic acid (PA) content （μg/g）	Lactic acid (LA) content （µmol/g）	Invertase activity (μg/min/g ）	Hexokinase (HK) activity（U/g）	Phosphofructokinase (PFK) activity （nmol/min/g）	Pyruvate kinase (PK) activity（U/g ）	Lactate dehydrogenase (LDH) activity（U/g）
LT-1	6.33867	8.67115	3.84751	1967.05	185.224	4.0923	768.316	248.743	78.1068	1837.87	94.8536
LT-2	5.47917	7.01394	2.93108	1661.11	188.28	5.05302	697.365	243.588	68.166	1601.37	95.8358
LT-3	5.76398	7.71486	3.36464	1807.22	179.211	5.96744	666.197	262.473	69.1385	1640.82	94.2925
NT-1	7.3014	9.90283	5.03908	2423.82	183.878	4.82605	1010.79	324.202	88.8069	2023.93	209.455
NT-2	7.91296	10.5202	4.81507	2760.88	196.576	4.0781	1020.86	302.946	92.0581	2189.22	208.155
NT-3	7.54471	11.1297	4.73827	2527.03	198.733	4.74784	1019.31	358.913	98.3025	2268.28	216.979
HT-1	10.1366	14.1914	8.96718	3669.07	271.339	1.97355	1313.4	572.118	109.331	2642.29	316.265
HT-2	9.67664	14.4739	8.49926	3590.38	271.866	1.78647	1312.73	528.406	113.74	2894.5	328.69
HT-3	9.84801	14.5278	9.49047	3677.52	277.974	1.81386	1352.53	513.417	104.469	2736.75	309.325
EHT-1	6.28141	7.70449	4.7168	2476.87	210.016	5.22298	708.71	234.698	71.2662	2518.62	138.563
EHT-2	6.58414	7.71085	4.40739	2465.03	204.088	5.37183	742.846	252.107	74.3629	2512.97	139.583
EHT-3	6.60261	8.32534	4.85165	2434.23	193.45	6.85096	755.013	247.784	62.4847	2552.63	146.832
