# Supplementary material for: Transcriptomic, and metabolic profiling reveals adaptive mechanisms of Auricularia heimuer to temperature stress
Source: PeerJ. 2025 Jul 21;13:e19713. doi: 10.7717/peerj.19713 (PMC12288747; doi:10.7717/peerj.19713)
Supplement: Supplemental Information 12 [file peerj-13-19713-s012.xlsx]

## Sheet: Sheet1
Supplemental Table Fig 2. raw data
Sample number	H2O2 (μmol/g)	SOD (U/g)	CAT (U/g)	MDA (nmol/g)	POD （U/g）	PRO (µg/g)	Lip （U/g）	Laccase（U/g）
LT-1	66.8017	504.926	220.69	76.1402	18126.2	103.139	53.1188	269.808
LT-2	66.0021	531.84	207.69	68.766	17800.6	100.773	55.3193	239.486
LT-3	65.8193	582.726	198.072	59.7738	16647.6	105.899	61.0267	256.539
NT-1	57.3476	718.66	255.233	56.6638	29438.5	88.7384	63.036	336.855
NT-2	55.3253	709.476	268.852	51.2959	28793.5	84.3593	59.2917	352.39
NT-3	57.2086	748.326	277.178	56.8871	30375.2	88.4756	60.7058	382.862
HT-1	47.6539	955.792	298.378	36.8715	32520.8	78.7223	68.3893	408.521
HT-2	45.4267	1067.04	297.832	36.328	33447.2	72.3086	76.3789	397.992
HT-3	45.5062	1063.53	291.167	36.4324	32558.2	71.2066	68.8737	398.258
EHT-1	41.1789	1051.15	324.13	21.0318	28283.9	57.6651	87.2425	303.579
EHT-2	43.1282	1064.39	300.528	19.9283	24292.4	61.9136	90.705	324.746
EHT-3	45.1131	1094.76	322.689	22.5466	27091.3	53.8011	74.9432	325.553
