# Supplementary material for: Transcriptomic, and metabolic profiling reveals adaptive mechanisms of Auricularia heimuer to temperature stress
Source: PeerJ. 2025 Jul 21;13:e19713. doi: 10.7717/peerj.19713 (PMC12288747; doi:10.7717/peerj.19713)
Supplement: Supplemental Information 13 [file peerj-13-19713-s013.xlsx]

## Sheet: Supplemental_Table_S6 
Table S6.1 Glycine, serine and threonine metabolism
Gene ID	Gene name	Chrom	Location	Gene	LT	NT	FC	log2FC
gene04266		Scaffold6	1785386-1787959	ATGACCGAGGCTCTCAGGAAAGTCTTCGAGGATAAGAAGGCCAAGGTGCGCCAACCCACCGCCGTCAACGTGAGACTGACTGAGAGGCGCAGGGCCAGCCAGCATTCATCCCGTTCGTGACGGCGGGCTTCCCGACCGTCGCCGACACCGTCGATGTCCTCCTTGCCATGCAGGCAGGCGGCGCGGACGTCATTGAGCTCGGCGTGCCGTTCACGGACCCCATCGCGGACGGGCCGGCCATCCAGGAGTCCAACACTGTACGCAAGGCAGAATTTTGGCGTAGCTGGAGCTCACCCACGCTGCCGATAGATCGCGCTCCAGAACAACGTGGACTACACCCTTGTCCTCAAGATGCTGCGCGAGGCGCGCGCTAAGGGCCTGACCGCGCCAGTGTTGCTG…	1067.11	320.36	3.27907	1.71329
gene06164		Scaffold10	603114-604465	ATGTCTGAGCTGCAGGTAACCGTCATTGGGGCAGGTAAAACTCACGAATCTCTTCATGGCGTGAGCTCAAAAAGCGGTATACAGGTGTCGTTGGTCTTTCAACAGCGCTCAAGGCGCAGGAGAAGGGCCATAGAGTCACGATCATCGCCGACGCGCTTCCCGGCGATGTGAAAGGGCCTCATTATACGAGCCCTTGGGCCGTACGTGTCCACTGCTCCAGCAGGCTTCATCGAGATCGCTCACGGTCCCGTAGGGCGCGCATCACGTCAGTTTCGCGGCCGTGGATGACCTCCGCCAGCAGAATTTTGACAGGCAGACGTTCAAAGTGATGTGGGAAATGTCGGCACCAGGATCCGACGCCGAAGGCTGCTTCATGCGGCTGCCGCAGACCGAATACTT…	344.89	907.95	0.383604	-1.38231
gene07463	CHA1	Scaffold13	504397-505757	ATGGCGCTGTCACCGTTGTGGACGAAGACGCCGCTCGTGCGCTCAGACAGTATTTCCAAAGCTATAGGATGTGAGGCGTATCTCAAGCTCGATGTCAGTTGCCCATATATCCCAATTTTTCTATAATTTTGACCAACCGCAGACACTGCAACCGTCGCACTCGTTCAAGTACCGCGGGATGTCGCACTTCGTACAGAAAGTCAAGCGCGACAAGGGCAGTTCTGCTCATTTGGTCATCGCGTCGGGAGGAAACGCTGCCATCGCCGCGGCGTGTGCAGCCCGCGCGGTCGGAGTGCGGTGCAGCACCTTCATGCCTGTCGTCACGCCCGCCAGCGTTGTGGCCTACGTTGAGCGACAGGGCGCAGATGTGCATCTCTCTGGAGAAGACTATCTCGCTTC…	15.0133	40.0867	0.376078	-1.4109
gene12495		Scaffold40	306395-307957	ATGGCAGCATCGCAATTCAACGCGCGCTCACTCGTAGCGCTGCCCGACAAGGCAAGCCTGCTCAAGCAATACGGGGGCAAGAAGCTAGCAGAGCTACCCACGCCGTCGTTCGTCGTCGACAGGGCCATCGTGGCTTCCAATTGCGCACACATACACGAAACCGCCAAGAAATGGGACGCGCTCTTCCGTGCCCACGTAAAGACTCACAAGGTACCATATCTGAATGCATAGCTTAGTCTGCCATGATTAATGATCCTCAGACTGTCGAAGGAACACTTCTGCAGTTGAAATCTACGGCTAATACGACACACGCTGTTGTTGTTTCCACTCTCATGGAAGCCTGGCATATTGTTAACTCCGGGCTATGCAAAGATGGTACTGTCAAGGACGTGAGTGGCA…	26.9767	75.3833	0.360227	-1.47302
gene12085		Scaffold37	62263-66416	ATGGTCACCAAGGACGCGCAGATATGCATTGTCGGCGCGGGCTGCTTTGGGCTTTCCACGGCTTATCACCTGCAGGAACGCGGCTACACCAACATCACCCTCCTGGAGCGCGCGTCAACGCACCCGCCCCTGACGCCGCGAGTACGGACATCAACAAGATTGTGCGCTCGGCGTACAGCGATCACGTCTTCGTCTCTCTCGCGCGCGAGGCTATCGAGCTCTGGAAAGACAAGAGCGTGTTTGGGGACAGCTATCGAGAGTGCGCGGCATTATGGTCGTCTTGAACGTGACTGACGCGCGACCGCGCCAGATCTGGCGTTCTCGTGCTCTCTGCCGACGTGGGATTCCTGGGTAGCGCGAACACGCCGCTCGAGAACGAACGCGCGGCGGGCGCGCCCA…	56.0933	153.48	0.364859	-1.45459
gene05778	ALAS	Scaffold9	970608-972819	ATGTTGCTACCTTCGCACCCCCTCTCTATGGATATGCTCGCCCGATTCAAGGCAGCGTGCCCGTACCTCGCCCGCACCAAGCCCTCGACGCTGCGCAACCTCTCTACGGCTGCGTCAGTCCGCTCGCCGGCGCTGTCCAAGCTCACTGTCAAGGCGACCAAGTGCCCCGTCATGGGGCCTGCTCTGGCCATCCGCACGGCCCAGATGCACACCTCGGCCGCTGGTCGCGCGAGCGTTGCCAACGCCCAGGAGATGGAGCAGCTTCACCGCAAGGAGGGTGTCGTGTTCCCCGTCGGACACCCGCCCATGGCCGCTGGCGCCAGCATGTGCCCGCACGCCAAGGCTGCCCAAGCTGCGGCTTCGCTGGCCCAGCAGCTCGTCGACAAACACGGCGGCCGG…	85.17	175.437	0.474777	-1.07468
gene11521	ilvA	Scaffold32	203153-204907	ATGCCGGTGAGTGTGCCCACCTCTATGTCTCAGAACCCTACTGACGGCATGTTTCCGTCGTTGCAGAAAGTGCTAGACATCTCTGAGAGAACTTGCAAGAAGTGCGATAAAGTATTTGGACGGAAGGCCGACAAGGACAGACACATGAACGACGTTCACAACTGCGTTCGGTACGCATGTCAGGCTCCTTCCAAAACGCCGTCTGACTCATATGGTATTGCAGGAAATGGAAATGCACGAAGGATGGTTGCAAATATACCAGCACTCAGGAGGGTAATTGCCGCCGCCACATGAGATCGTGTCATGGACTTGACGAGGACCCAATCGTCCTGCAACTGGTCGAGATCGCCTCGGACGAATCGTCCGCATCCTCCTCGTCCTCGTCGAGAGCGGCGAGCC…	0.583333	1.88667	0.307532	-1.70119
Table S6.2 Tyrosine metabolism
Gene ID	Gene name	Chrom	Location	Gene	LT	NT	FC	log2FC
gene07030		Scaffold12	462087-465448	ATGTCTGAATCACCGAACTTCACGATGCTCGCCGCCGTCTATAAGCCAGGGGAGCGGAATCTCGAGCTTGTGCAGACTGCACGACCACTTCCGGGACCTGGAGAGGTGCTACTCAAGATTCTTGCGTGTGGAGTCTGTCACTCAGATGTGAGTGTGCGGATTAACGCTCTACGTATAACTGAGGCAACAATGACCCATACAGCTGTTTATTCTCGATGTCGCAGGTGCCGCGCTCTACCCCAACTCGTTCACGATGGGCCACGAAGCCTGCGGCGAGGTCGTCGCGTGAGTTTCCCCAGTACCATCTTCAATGCCTGTCACAATCTCATGGGCCACTCTTAGGCTCGGAGAAGGGGCAGAAGCTGAAATCGGAGCAGTATACTGCGTTCACATTTCATC…	21.19	48.5533	0.444178	-1.17079
gene01692		Scaffold2	2750279-2751609	ATGGTCGTTGTTCCAAAACTTGTTCTGGTCGTCGCGGCTCTTTGCGCAGGCTCGTACGCGCTCCCGCCTTGGGTTCAGCCACCGGGCCGCGGTGGCATTCAACCACCGTTCCCTCAAGGAGGTCCACTCTCCGGCCCCCCGGACCACTGCCTTCCCAACCAGTTCAAGGTTCGCAAGGAATGGTACGCCTATTCCGTCCCATCTGTGCTCAGGCAACTCATCGCGAGAAGGGGCAACATGAAGCCCGCCGAGCGCAAGGCCTACACGACCGCGGTTCGCTGCCTGCAGCAGAAGCCGTCCAAGCTCTCACACGACCTCTACAACACGACCTCACGTTACGACGATTTTGTCGCGGTGCACATCAACCTGACGCGCACGGTGCACAACGACGGCATCTTC…	42	99.76	0.421977	-1.24476
gene01666		Scaffold2	2671275-2672621	ATGCCAGATCTGCGCGCGCTCAGTCACCCTGGCGGCAAACGTATAAAGTCCCAACCACGCTGTCGTTCTCTCCGACCGCGCCCGACATGCACAGATCAGCTCTTGCGCTCTTTTTGCTGGCCACTTTTTTCACCGCTCTCGCGGCTGCGCGCGCGACGGCCCAACATCACGACCACAAGCATCATATTCCTCGGCCTTGTCATCCACATTCAGTCAGAATTCGCAAGGATTGGCGAGTCTACTCCTTGTCGCTATCTTTCGTTAGCTGACACAGTGCTTGCAGGGGCGATCTCAGTCACAAAGAGCGCAAGCACTATCTTGACGCGGTCCTGTGCCTGCAACACAAGCCGTCTCAGCTCGATAACGCGTTGTACAACACAACATCGCGCTACGATGACT…	255.37	12.51	20.4169	4.35169
gene06528		Scaffold11	291439-292802	ATGTCGATGCTAGCCGCTGTATACAAACCGGACAGTGAACCTCTTGTCGTTGAGCGCGTCGCCAAACCTACACCCCGCGATGATGAGGTGCTGTTGCGTGTGCGGGCTTGTGGTGCCTGCCATTCAGACGTATGTTCGAGTTTCAGCTCTACATTGCATCACAGAATCTCTCAGACTTCCCCTAGCTTGTTCTCTTGAACTCTCGCGTATACTACCCCGACCCGTTCATCATGGGCCACGAGATCAGCGGGAGGTCGTCGCGTGAGTCGTCGAGCATGAGGGAACCCAGCCTGAGTAGCTATTGATTCACTTTCAGACTAGGAAGTAGTGTGGGTGCAGATATCGTCAAAGGAGCCTTATACAGCGTGAACATCGCCGAGGGACGCCTGCCGGGCAAGT…	45.77	97.91	0.473251	-1.07932
gene02817	hpaI	Scaffold4	1221340-1222340	ATGCTGCAAGTCGCCCACCCGCTGCTCAACGCCCTGCGTGCATCCAAGCCCGCGTTCGGCGCGTGGCTGACGCTCGCGAACCCGTCGCTCGCGCGCGCCGTCGCGCTCTCGCACCCGGCCATCTCGTGGGTGTGCCTCGACGGCGAGCACGGCCTGTTCGGCCTCGGCGGCCCCGCAGTGCACGACACGCTCTCCGTGCTCGCAGCGCTGCCCGGCGGCGGGCCTACGGCGTACATCCGCATCCCGGCCACGGCGGAGACAGACTCGGTCGGGTGGCAGGTCAAGCTCGCGCTCGACTCTGGCGCGCGCGGCGTCCTCGTGCCGATGTGCCCCGACGCCGCGGCGGCGAAGCGCGTCGCGCAGGCCGCACGCTTCCCGCCGGTCGGCGTCCGCGGACTG…	394.84	1091.92	0.375621	-1.41265
gene07632	hmgA	Scaffold13	1053357-1058941	ATGTTGGCCTTCAGCATCCGTCCCATGGTCCTGCGCGCTGTGAAACGCTTCGACCAGATTGGAATAATGGTACGCTGGGCCCACGCTCTCGTCGTATAGCTATGCGCTTACGCGGCGCTCGCAAGACTTGTCGCCGGACTGTTGTCTCCTATACCGCGCCGAAGGGTTTCACTACCACCCCTTCGGACTTGGATCCCTACAGGTACCAGGTACTTGCGAATAGCCTTTTGTCTTCGAGCGTCTCTCATGTGAGTAGGTCGGCTTCGGCAATCGATTTGCTAGCGAGGCAATGTGCGTCGGAAGTATGCGTCGCTGATATCTCCCCGGCTCAACGCTTTCTAGTCCGGGAACGCTTCCAGACGCTCAGAATAGCCCTCAGAAATGCAAGTACGACCTATA…	6.81	2.95333	2.33347	1.22248
gene05226	gabD	Scaffold8	1059823-1066727	ATGGCAGCAGCAGCTGTAGGTCCCATGGTCGTGTCCACGCCCGTGAAAATTGACTTGTGGTTGTCTTCAGTTCGGTCTCAACGACTCGGGCCTCGTCCACACCAATGGCTACATCAATGGCAAGTGGCTCGACGCGAAGGACACAAAGGGAGGGGAAACGTTCGATGTGACGAGTGAGTGCGCATTGACGTCCATTTTAGTATGCACTCACTGCGACTGTCAAGATCCCGCAACGGATGAGACGCTCGCCGCTGTGGCCGACATGGACGTCGCGGGGGCGAAGGAGGCCATTGGCGCGGGCTATGTTAAGTGTTCATTATCTGGTATAATGGTCCCAAGTTGCTCAGTATAGAAACCTGGGACTTGTGGTCCCAGGTTTCCATGGTCCCAAGATTCATA…	65.7533	27.6933	2.47472	1.30726
Table S6.3 Protein export
Gene ID	Gene name	Chrom	Location	Gene	LT	NT	FC	log2FC
gene11777		Scaffold34	173167-175007	ATGTTCGTCCACCCGCTGCTGCCGCTGCATGTCCCCAGCCGCCCGCTGCCGCGGCGCGTGGAGTCGCTCGCTGGGCCGGTGCGTGCGGTCCTCACTTTACACCCTACATCTCACCTCCACCTCATTTGCTCAACGTGCCCGCCTCATCGCATTGCAGACGCTGCCAGGCCACTACGTCTGCACGCCGGCGGCAGCGCAAGAGTCCTTCGCCTCATCCACGAACGACGCCGACGGCTACTTCGCCCTAGCGCGCTTCCCCACGCCCTCCAGCTTCCCCGACACACCGGGCTCCTGCTACTCGCAAAACTCGCAAGACGACGACGAGGACGCGGACGCGGACAGGCTGCCGCCGGCGCCCGTGCGCCCGCTCAGCTTCCCGCCCGCGCGCGCCATCCCCGC…	17.8833	8.94667	2.02304	1.01653
gene05447		Scaffold8	1743500-1744153	ATGTTGGTCGATCATACCGAGGTTCGTAAAGCCATGGAAGATGACGATGGTCGTTGACACCTGTGCTCATAGTTTCTGAAACGACTTTCGGATTTGTTCGATACGACGAACGCGCAGGGCGGGTCCATATGGCTGACCCACAAGCGCTGTGTGCAATGTTCTCCATGTCCTCGTTGTAGCTAAATTCACGCGCAGACACGTACCAGGAGGCCGACGCGCAACAAGCACCCGTCGATGCTGAGCGAGAATACCCGTTGCTTGTCCGCGCCGTGGATGGCGACGACGTGAAATTTTCCACGCTGGTGCGTCGTGGCCACCTGCCCGTGACTGTTCTGACAATACGCATTGCTGCAGGCGCAACCATCCGAGCTAGAGACCTTCCACGCGCACTATAGCGCG…	461.93	195.527	2.56029	1.35631
gene02063		Scaffold3	1204527-1206568	ATGGTGACGCTGACGAGCTGGCAAGAGTACCAGGACGCGGCGGAAGCGCTCTATACTGCGTCTCCGAATAAGGTTCGTTGATTTTACGCGTTTCAAAACTGGCTATAGCGCTGACGGCGGTGTACTACGATTCAGACGCGATACGTGGTCAAGTGGAAGGTCGCGCGCGACGGCTCGAACAAGGGCCGCGGAGAGCTCGTGCTCAAAATTACCGACGACGTGACAGTGAGTACGATGCGCTGCATGCGTCGACCACGGCGACGGCCATGTCGCGTGCATCGGGCTGCTTAAAGTTGTACCACCGCTGACGCGCCCTTCAGTGTCTGAAATACAAAACGCAATCATCCATCCTGCTCAACCGCTTCGAGCAGCTCAACCTGACGCTCGCAAAACGCGTCC…	55.2967	25.79	2.28935	1.19494
gene08674		Scaffold17	84165-85050	ATGGCGCGCAAGAAGGCCGGCGAACAGCAACCAGAGCCCGCTACAGCAGCAGCGGACGCGGCGGGTCCTGATCTTGCGCCGAATAAGCCAGCGCCCATCCCGCTCATCCTCGCGCCCGAAGGCAACGCTGCTCGCGACACGGTCAAAGTCAACAACGCCAGCGCGAACGAAATGAAGATTGCATGTGACGATGCTCTCAAGCGTGTCAGTAATGAAACGGCTGGTTGAGCACGCTGCAAGTACTAACTTGCGGCGTGCAGTTCCTCTCGCAACCGGGCGCGTTCAACCAGATAAATGTGCACACGGACGTTCGTCTCGTGCTGGGCTGGTCCAGCGTCATTGTCGCGGGCCTTACCGGTCTCTACGGCTGGAAGGTCGAGTTCGAAAAGTCCAAAGCCG…	475.447	238.473	2.06559	1.04655
gene02687	SPC3	Scaffold4	843074-843842	ATGCACAGCGCGTGGCAGCGGCTAAGCAATGTGTCGGCGTTCTTGACGTCGTGCGCGATGGTCTTGGTCGCGCTCGTGTCCATCGTTTCCCTCCCTGCGCCGCCGGACGTCAGCGCGAAATTGACGGTCGCGCCTCAGAAAGTGTGCGTATCGGCATGCGCGACATTTCACTGTTTTCATAGTCTGACCCCTTGGTAGATTACAAGGTCGCAAGGGTAACTACGGGCGCGAGCAGGACTTTGCGTTCTTCAAGTTCGACTATGATGCGGGTTAGCTGCGCTGCCATTACCACGCCGTATAATATCACTGTCACTCACGCGTTTTCGACAGATCTTGGTCCGCTATTCGACTGGAACACCAAGCAATTATTCTTGTACCTTGTGGCCGATTATACCAACA…	413.933	197.137	2.25275	1.17169
Table S6.4 Valine, leucine and isoleucine
Gene ID	Gene name	Chrom	Location	Gene	LT	NT	FC	log2FC
gene05855	leuB	Scaffold9	1186692-1188051	ATGGCCCCTCAGACTTACAAAATCGCCGTGCTCCCCGGCGACGGCATCGGCCCCGAGGTCGTCGGCGAGGCCGTGCGCGTGCTCCAAGTCATCTCGGCCAGCTCCAGCAGCGCCAAGTTCGAGTTCACGACGTGCGACATCGGCGGATGCGCCATCGACAAGCACGGGAGCCCGCTGCCCGACGCGACGCTGGCCGCGTGCAAGTCGGCCGACGCCATCCTGCTGGGCTCCGTCGGAGGCCCGAAGTGGGCGGTCGACTGCCCTGTGCGGCCCGAGCAGGGCCTGCTCAAGCTGCGCAAGGAGCTCGCGCTCTACGCCAACATCCGCCCAGCCCACTTTGCCTCGGACTCGCTGCTCGACGCCTCGCCGCTCAAGCCCGCCATCGCCAAGGGCGTCAAC…	268.04	664.823	0.399423	-1.32401
gene01609	ilvD	Scaffold2	2488077-2489228	ATGTCGTCTGAAGGTGTCGATATGTAAGTACGAGTATGTTTCCTCGGTGGCATGTCTGATGGGTACGGTAGCCACCGCGTTTCGCGCTCGTCGCCCACGAGCGGCAATGCCAAACTCAACAAGATTTCATCTGCAATCACTCAAGACAAGGCCAGTAGTTATATGCTGTATGAAGGCCTTCTCTGACAATATTGCAGACCATGGGAGGCAGCCAGGCGATGCGTAAGGATGCAACCCGTTGCCAGTCTACGTATTGAGGCTCTACAGTGTACGCCGTCGGATTCGACGAAAACGACATGGACAAGCCTCAAATCGGTGTAAGTTTACTTGCTCGCAGACCTAGGAAGATTTATTGACATCGTTCCTCTAGATCTCTACAGTCTGGTGGGAGGGAAACCC…	2.70333	16.0967	0.159621	-2.64728
gene07463	CHA1	Scaffold13	504397-505757	ATGGCGCTGTCACCGTTGTGGACGAAGACGCCGCTCGTGCGCTCAGACAGTATTTCCAAAGCTATAGGATGTGAGGCGTATCTCAAGCTCGATGTCAGTTGCCCATATATCCCAATTTTTCTATAATTTTGACCAACCGCAGACACTGCAACCGTCGCACTCGTTCAAGTACCGCGGGATGTCGCACTTCGTACAGAAAGTCAAGCGCGACAAGGGCAGTTCTGCTCATTTGGTCATCGCGTCGGGAGGAAACGCTGCCATCGCCGCGGCGTGTGCAGCCCGCGCGGTCGGAGTGCGGTGCAGCACCTTCATGCCTGTCGTCACGCCCGCCAGCGTTGTGGCCTACGTTGAGCGACAGGGCGCAGATGTGCATCTCTCTGGAGAAGACTATCTCGCTTC…	15.0133	40.0867	0.376078	-1.4109
gene01610	ilvD	Scaffold2	2489458-2492184	ATGTCACTCCCTTACTCGGCGACCATCCCCGCAGCGTATCCAGGTGAGTTTCTTTAGGGATTCCGTTTCTTCGTTCTGAAATTTGGGCAGAGAAGGTCCAGGAATGCCTCCGTGCCGGAAAATATAGTAAGTTTTATAGAAACATCGATTGTGTAACTCTCACCCGTTTGACAGTGAAATTGTTGCTCGAGCGCGATATAAAGCCTCGGTAAGTTGCTGTACTCACTCTGCTGCTCAAGATTTAAGATGGCCCCAGCGATATTCTCACACGCCAAGCATTCCTCAATGCAATCACCGTGGTGAACATCATTGGCGGGTCTACGAACTCGGTTGGTCGAATTTTCATCCAAAATTACATACGTTCAATGTCCCCACTCGCAGGTCCTTCACCTGCTTGCA…	42.3367	164.667	0.259148	-1.94815
gene11521	ilvA	Scaffold32	203153-204907	ATGCCGGTGAGTGTGCCCACCTCTATGTCTCAGAACCCTACTGACGGCATGTTTCCGTCGTTGCAGAAAGTGCTAGACATCTCTGAGAGAACTTGCAAGAAGTGCGATAAAGTATTTGGACGGAAGGCCGACAAGGACAGACACATGAACGACGTTCACAACTGCGTTCGGTACGCATGTCAGGCTCCTTCCAAAACGCCGTCTGACTCATATGGTATTGCAGGAAATGGAAATGCACGAAGGATGGTTGCAAATATACCAGCACTCAGGAGGGTAATTGCCGCCGCCACATGAGATCGTGTCATGGACTTGACGAGGACCCAATCGTCCTGCAACTGGTCGAGATCGCCTCGGACGAATCGTCCGCATCCTCCTCGTCCTCGTCGAGAGCGGCGAGCC…	0.583333	1.88667	0.307532	-1.70119
Table S6.5 Arachidonic acid metabolism
Gene ID	Gene name	Chrom	Location	Gene	LT	NT	FC	log2FC
gene02303		Scaffold3	2002775-2003649	ATGGCCCAGTCTAACCGCTACGAAATCACCTACTGGCGTCTCCCGGCCTTGGGAGATCTGCCGCGCATGCTGCTCGACGTCGCGGGAGTACCGTACGAGAACACATTCGTGGACAGGGAGGCCTGGAACGGCGGACTCAAGGACACCATGACGTTCGGCAAAATTCCCAGGCTCACGATCCACGGCCCTGATGGCACCAAGAAGGTTTGCAGCATCTATTAGCGCTCTCAAGCTTCGCTGACGAGTGGATCTTGTGGAAATCGCAGGAGATCTTTGAGACCATCGCCATCGAGTCGTACCTTGCCGAAACCCTCTCCCTCGTCCCGGGGCCTGACGCATTCTCGCGCGCGGAGTGTCTGAGCGTCGTGTCGTCCCTTAAGGACATGATGGACAAGGTGA…	230.9	556.193	0.438561	-1.18915
gene02360		Scaffold3	2230448-2231299	ATGGCGCAATCGACTCGCTACGAGGTCACGTACTTTCGCGTCCCGGCGTTAGGCGATCTGCCCCGCCTGCTGCTGGAGGTCGCGGGGGCACCGTACGAAAATACCTTCTTCGACTTCCAGGGCGACTGGCCGAGCCACAAGGAATCGATGACCTTTGGACGGATCCCCAGACTCACGATTTACAGTCCAGATGGCACCAAGAAGGAGCTCTTCGAATCGTTCGTCATCGAGGCGTACTTAGCAGAGACACTCTCCCTGGTCCCTGGACCCGACGCGTTCTCCCGGGCCGAATGTCTCAGTGTCTCCTCGTCCCTCAAGGATATGGACGAGAAGGCGCGCCGCGAGGGACACAAGAAGAACCTTGCGGAGGTAATCCCCTCCTTCCTGCGCTTCCACGAG…	170.07	401.91	0.437889	-1.19136
gene11676	PLB	Scaffold33	238963-239919	ATGGCCCTTGGAGACAGCGTAACTGCGGGCTGTTTCGCCAAAGGTCGGCCAGGGACCCTTGGCGTGTCGCGGACGAAGATGGCCACTGACACACCCGCTGATCAGGCATACAGGATGATGTCCTCTCTGATTTTGATGAATGGCGTGGTGTCTCATTCGCTGCTGGAGGAGACCCTGGCGCTTTGACAATTCCCAATGTGAGCATTCGCACGGAACCCATTTCTCGACTGATACGACCAAATCCAATGCTAGTTCATCGGTCATTACAACCCGGTTGCGCAGGGCGCGAGCATCTCACATCACGGCTTGGAATATTGCAGTGGTCTGTACCATCGCGCAGCGTAGTTTAATGAGAGAGACCTGACACAGCTTAGGGACTACATGCCCATCTGGTTCGTT…	38.19	87.52	0.44155	-1.17935
gene08416		Scaffold16	220406-221334	ATGCTCGGCTACGGTGGCACGGACAAGCCCGCGGACGCCGCGCTGTACGCCCGCAGCGCCATGGCGCGCGACGTGCTCGACATCGTCCGCTCGCTCAACCTCAGCACGAAGCCCCCGCGTCGTGGATCTCTACTCGACGAGTTCGCGGCGTTCGCGTTCTTCAACGTCGGCTACACGCCGCCGTCGCCTGTGCCGTTCGACTTGAAGTCGGTGCTCGCGTATATGGAAAAGCTTACTGGCAAGCCTGTCTTGGCGTACTGGGAGTTCTTTACCAAGGAGGGCGCGGACAAGATTATCGAGAAGAACTTCGACAGCTTCCTCGATCTGCTGCATCCCTCCGACACACCGACAGTCTGGGGCAGCGTCTTAATGGCCCGCGGAGAGACAGAGGCGTTCCTG…	5.18	1.7	3.14526	1.65318
gene08410		Scaffold16	206478-207745	ATGACTCTGGCGCAGTTCGAGGACAAGTACGGCGCGTACTGGAAGACGCACAAGACGTCGCGCGGGCTGACCTACCGCTTCCTGCACGTTCCCGCGACCGCGGCGCACGGGACGACACTGCTGTGGCTGCACGGCTTCCCGTCGAGCGTGTACGAGTGGCATTACCAGCTGGACCACTTCCATGCCAAAGGTACGTCCGATTCGCATTCCGTTTCCACGCACTGTATGCTGAATATTCCGCTTACGACGCAGGATACGGCCTCATCGCGGTGGACATGCTAGGCTACGGCGGGACGGACAAGCCCGCGGACGCCTCGCAGTACACGCGCAGCGCGATGGCGCGCGACGTGATGGACGTTGTGGAGTCGCTGCAGCTGCCCGGCGGGAGCAAGAAGCTCG…	9.15667	31.6933	0.306999	-1.70369
gene05774		Scaffold9	963541-964763	ATGGACGAGTCATTGTACAAGGACGCCGAGGTCGCTGGCGCAACGTACCACTACTTCGCCTCTCCGCCGGAGAACGGCCTCCCGACGCTGCTCTTCTGCCATGGCTGGCCGTCCACATCGTTCGACTGGCGATTCCAAGTGGCGTACTTCGTCCATCTCGGCTATGGAGTGGTCGCGCCGGACATGCTGGGCTATGGCGGCACCGCTGCTCCATCTGAGCTGGACGCGTACAGGTCACGGAGATACTGCAAACAACTTGTCGCACTGCTCGATATCGAGAACGCCGAAAAGGTTGTGGCGATCGGGCACGACATGTACGTGTAAATCGTTCGATGGGAGTGGGTGCACCTGCTCATTTGTGCTATTGTAGGGGTTGTCTAGCCGTCTCAAACTTGGCAA…	3.00333	1.07	2.92989	1.55085
Table S6.6 Starch and sucrose metabolism
Gene ID	Gene name	Chrom	Location	Gene	LT	NT	FC	log2FC
gene04470		Scaffold7	378469-381176	ATGCAAAAGGCAGGTGCTGGGTGGGCGCTCTTTCCCTTCCCTCCTCCCGCCCCGCCCGTCCCCGGCTCTCTCAGCGCCGCCGCAATGGAGCCGCAGCCGCACGCGTACCCGCCGCCCGACGCCGCGATGTCGCCCGCGTCGCCGCACTTTAACGAGCCGCTGATGCCGCCGACGCCCATCCAGCACCTGCAGCGCGAGTCGGTGCACTCGTCGCTGTACTCGGCCGGCGCCCGCGACTCGGGCTGGACGTCCCGCGCGTCGCTGCAGGAGGAGCGCGGCCTGCTGCCCAACGCCAACCAGTACCAGCCCAGCAGCCCCCACGAGAGCAGCCCCAACCTCGCCGGCGCCCCGCTCGTCGCCGACCCCCACGAGCACGTTTACCTCGGCAAGAGCGAGTAC…	32.03	69.9867	0.444487	-1.16979
gene06365	malZ	Scaffold10	1293192-1297204	ATGGCCCTCGCTGGCCTTTCTTTTGTTCTTTCGATCCTTTCCTTTGCTCCTGCTTACCAGCCCCCCACTAATAACACTCTTGTGGCTCGCGATGGCATGGGCGCTATCAAGACCAACAAGGACGTTTCCAAATGTCCTGGTTACAGTCTTGAGTCTGTCGACGAGAACGCTGTAGGTTTGACGGCCAAACTCACCTTGGCCGGCGACGAATGCACGGCGTTTGGCAAGGACATCAAGGACCTCACGGTTGAGGTGACCTACGACACCCAGACCAGTATTCGGCTGATACGAGACGACTTGAGACTTCATGTGAAGATCTACGACACCGCGAAGAACCAATTCCAGATCCCGGAGTCGTTCATCGAGCGTGCCGGGCCCGACGATGGTGCCTCCGCCGAC…	1.27667	2.78	0.450643	-1.14994
gene07894	bglX	Scaffold14	621274-625083	ATGCTGACGCGTCTGATCCTGCTTGCTCAGGCATTTCTTGCGTGCCATGGACGAGAGGGCAAGCCGCTGTACAAAGACCCGAGTGCGTCCATCGAAGCGCGGGTCGCGGATTTGCTGCCGCGAATGAGCGTGCAGGAGAAAGTGGCCCAAATGTAGCGCATTCTCGCAGGCAGTAACATTCGAACTGACCCCAATCTCAGCATTCAGGGTGATATGAACGGATGGATGGACTTCAGCGATCCCAACGATAACACACTCACGTTCAATGCGTCGGGACTCGTGAGTTATTATTGCACTCCGGAATGTGTGTTGACAGTTTCAGGTCGACATGGCGAAAACGAAAGCGGGCGCATTCTGGGGTCAGACTTTGGCCGTGAAAATCCTTGGCGGTATTGACAT…	2.71333	1.27667	2.15282	1.10623
gene02549		Scaffold4	441597-451637	ATGGTGCAGCAATTTCTCGTATCGGTCATTGCTTTGACGCTGCTCCTCGCCGGGGTGGGTGCCATGCCCACCCGCGAGGAGATTAGGACGCGTCAGCATGCCTTGCGCGCCAAGCGTGCTGCCGCGTTTGCCAGTGAGCAGAAGCGCGAGACGCCGCCTCTGTCAAATGGCCGCTCATCGACGATCACCTTCTCCAATCCTGCTGCCGCACAATTCCACGTGCCGGGGACGAGCCTGCCAGATGTCGACTTCGATGTCGGTGACTCATGGAGTGGTGCGTATATGGAACAAACCACGACTAGGCGCGTGGGCAAAGGTGTTAATTGAATCTCAAGGTTTGATGCCAATCTCTGGCGCAGCGAACGAGACGAGAAAGTTGTTCTTCTGGTTCTGGCCGAG…	52.0533	106.003	0.492264	-1.0225
gene08830		Scaffold17	611397-614471	ATGCCAGCGCCCCCAGAGTCGACGAGCACGATGATACGCGACACCGCCCAGCTGCGCGAGACCGTCGCCAGGCTCGAGCAGGAGCACCGCGCGCGCGGCGTCGAGCTCAGCGGCCGCATCGTGCACGTCTGCCACTACCTGCCCTTCGTCGCGTCGCTCGCCGCCCGGCCCAGCTCGCTGCTCAGCCCGCCCAAGACGCCCGAGCCGGCGGAGGCCCAGCTGCCCGACCGCCCGCCGCGCTCGCCCAAGCAGCAGCAGTGGTCGCTGAGGCCAAGGAGCGGCCATGACGCTATGTTCTCCGGCTTCCGCTCGCTCGCCCAGGACTACGAGCAGGTCATCGTTGGCTGGACGGGCGACATCGAGGCCGGCCCCCAGCGCGAGCGCGTGCCCAGCGCCAGC…	161.317	327.77	0.478645	-1.06297
gene02051		Scaffold3	1164170-1167101	ATGGTCGTCTTATTCCCCAGCGTGGCCCTTGCGCTCCTCGCCGCCGTCGACAGTGCTCTCGCACTCGGCTCGGCATGCTCTGCGCCGCTTGGCGGAGGGAATGCTGCTCCTGGCGCGCCGTACTGGCTGGAGAACATGCCGACGCGCGGCGCGTCCGCCTACAACGTCAATCCGTCGTCGTATACTGTGCGGCGCAACGTGCGCGACTTTGGCGCACGCGGTGACGGCTTCACGGACGATACCATTGCTATCAAGTGCGTCTTATGCCTTCTCCCTTTCGCTCTCATGAAACACGCTCACTGAACGTGTGCACCTGCAGCAACGCCATCTCCAGCGGTGGGCGCTGTGGCCAAGCCTGTGGCCAGTCGACGCGTACACCAGCTGTCGTCTATTTTCCAC…	130.913	26.75	4.86692	2.28301
gene02203	bglX	Scaffold3	1653684-1656954	ATGCGGTTCCTCGTTCACCTCTCTCTCGCTGCGCCGCTCGCAACGGCAGCGAGCTTGTACAGTCCTCGCGGCGCTGGTCGCTCAACTTTGGACGCACGCGCCACCTCCATCAGCAACCCTCCCTCCAACACTGCGCAAGTACCAGACTTTGGGCCTGCCTGGGATGCCGCTTACAGCAAGGCAAAGGCTGCTGTACGTTGCAGCGCGTTGCGGCGCGCCCGTGGAGGTAATGCTCATGTCCGTCCAGCTAGCTCGTATGTCCATTCAGGACAAGGTGACACTTACGACCGGTACTGGCCTGGGCGCGGGGACGTGCAGCGGCAACATCCCCGCAGTTGCTTCTATTGGGTTCCCTGGACTCTGTCTCGAGGTGAGTCCTCGCGCTGAACGCGCTCGCCG…	3.07667	6.82	0.439984	-1.18448
gene01543		Scaffold2	2260583-2261374	ATGCGTTTCAACCTGAACCTCGTCTCATGTCTCGCGTTTGTGACTGCATCCATCGCAGCACAGGCCACAACGACTGTGCGTGGGAATCAGTGCGCTCCGGCGAACAAAGCCCCAACGTCACACACGTTTTCACACGCAGCGCTACTTTGACGGCCAGATGGGGGCCTGCGGCTGTGGATCCAACGGCCAAATGTTCTCGTGGCAAGGCGGCATCGCGTCCGGCGTATACACTGCTGCGTGAGCTCGGTCGCAACTCTCCGTCTCAATGCACGATGTGACCGCTGTGCAGCGCTTCCCAGAGCATCTTCGACTCGTCCGGCTCCTCGTGGTGCGGCCGCGGATGCGGTACTTGCTTCCAGTTGACAAGCACCGGCAAAGCGCCTTGCTCGTCGTGTGGAA…	11.3533	1.32667	9.07537	3.18196
gene06523		Scaffold11	277594-280199	ATGGCGCACCATTCTTATAACCCGTCGCTTGAGGACGTCGGGCAGCACCTCCAGCCCGGAGACGCGTATCGGTATCCCCCACGCCCCACCCACCAGCGCACGGACTCCGGCTGGTCCGACCACACGGTCATCGCGCCCATGCAGCAGAGCCCGCTCATCAAGCCCGTGCCCTATCACGACGACACGGCGTACACCCCGATGCAGTCGCAGGACGAGCTCTCGTACAACTATGGCGCGTCGCGGGACGGGCTCAACCAATACGCCGCGTCGCGGGACGGCCTGAACCAGTATACCGACAAGGCGCCCCCCGCTTGGTCAGGCGCACCAGTGCCCCGCAAATCGCGGAAACGCATGATTTTTCTTATTGTCGGCGGCATTATCCTGCTCGTTATCATCGTC…	37.4333	82.5467	0.442786	-1.17532
gene12642		Scaffold42	220821-222091	ATGGCGGGTTTTGGCAAGCTAGGCAGTCTGTGGGCTTGTCTTGCACTCGCGGTTGCGAATGTCTATGCGGTCGTGCTGCACACCTCCAGTCGCTGGATCCTCGACTCGAACAACCAGCGCGTCAAGCTGCGCTGCGTCAATTGGGCCGGGCACATGGAGGTCGGCATCCCCGAGGGCTTGCAGTTCCAGACGCCAGAGACGATTGCGAACTGGATCGCGTCGAACGGCTTCAACTGCGTCCGCTTGACGTTCTCGATCGACTTCGCGCTCAACCCCAACCGCCTCGTGCGCGACTCCTTCACCGCCGCCGCCGGCCCTGCAGGCGTGAGCGCGTCCACAATGCAGTCGCTTTACAACCAGGTGGCGGCGAAGAACTCGTGGGTGTCGTCGGCGACGCAG…	17.8933	8.81667	2.14488	1.10089
