# Supplementary material for: Transcriptomic, and metabolic profiling reveals adaptive mechanisms of Auricularia heimuer to temperature stress
Source: PeerJ. 2025 Jul 21;13:e19713. doi: 10.7717/peerj.19713 (PMC12288747; doi:10.7717/peerj.19713)
Supplement: Supplemental Information 14 [file peerj-13-19713-s014.xlsx]

## Sheet: Supplemental_Table_S7
Table S7.1 Protein processing in endoplasmic reticulum
Gene ID	Gene name	Chrom	Location	Gene	NT	HT	FC	log2FC
gene00766		Scaffold1	2438688-2440180	ATGGTCAAAGAGACGAAGTACTACGATTTGCTCGAGGTCTCTCCCGATGCCTCAGAAGCTGACTTGAAAAAAGCATACCGCAAACGCGCCCTGCGTCTGCATCCCGACAAGGGCGGCGACCCCGAGCTGTTCAAGGAGGTCACTCATGCTTACGAGGTCCTTTCTGACCCGCAAAAGCGTTCAATCTACGATGCACGCGGCGAGGCGGGTCTGTCCGAGCAGGGCGGCATGGGCGGCATGGACGCCCACGATCTCTTCTCGCAACTCTTCGGTGGTGGCGGCGGTGGCTTCTTCGGCGGCGGTGGCCCGTCGCGGCCGTCGGGTCCGCGCAAGGGCAAGGACCTTGTCCACCGCGTGCACGTGACCCTCGAGGAGCTCTACCGCGGCAAGACCTCGCGT…	486.243	200.52	0.409995	-1.28632
gene03868		Scaffold6	367457-368145	ATGGAATGCGATGGCGCACGTCCCTACACCCCTGAGCAGCTGGCCATCGTCGAGCGCATCTGCGCGCAGGGGCGAGGCGCACATTATGAAGTGCTAGGCGTCAAGGCTAGCGCGGACCTCAACGAAATGAAGCAGGCGTTCAAGACAGCAAGTCCTTTCAACAAGAATCCCGCGCCAGCCGCAGAAGAGGCCTTCAAATTGCTTGCAGAGGCATGGGAGGTGCTCAGCGACCCGTATCGTCGCTCAGTTTACGACCGCCAAAGAACTTTCGAAACTTCTTTCAACAAATTCAACCACGACCGGCAGCCATACCGCGACGCGTACGAGGAGCCCCCGATACCGACCTTCCGCCCGCGCACGCCGCCGCCGAACGAGACGCGCAAGCAGCGCCGGCAGCGC…	13.5333	5.96	0.436136	-1.19715
gene13822		Scaffold68	75868-76401	ATGTCTCTCTTCTGGACCTCGTTCCCCTTCGACGACGTCGACCGCGTCTTCGACGAGGCCTTCAATGGCTTCCTCCCTACTGGCGCTAGCAGCCGCCCGCGCATCCAGGGCAGCAGCAGCGATGACCAGTCGCAAGTTTCCCGTAGCTTCAGGCCAAGGTATGTTCCTTGTCTCGTTAGCTGCGCCAAGTGACTTCATGCTAACACCTGCCACAGGATGGACGTGCACGAGAACAAGGAAAACAACCTTGTGACCGCGACGTTCGAGCTGCCCGGCCTGAAGAAGGACGACATCACCATCGACGTGCACAACGGCCGTCTCACTGTCTCGGGCCAGGTCGAGACCTCTTCCGAGGAGAACAAGGACGGCTACCTCGTGCGCGAGCGTCGCTCTGGCAAG…	1.23667	7.47667	6.94464	2.7959
gene07484		Scaffold13	581013-581517	ATGTCGCTTTTCTGGACCGCGACTCCCAGCCCCTTCGCCGACTTCGAGCGCGCCTTCAATGACGTGTTCAACGGCAACCTTGCCCGCATCGGCGACGGGTCTAACGACACTGTGACCCAAGGCTTCAGGCCAAGGTACGTTACATCATCCATCACTCGTCGGACGTGCGTGCTGACTCCTCTGTAGGATGGACCTCCACGAAGACAAGGAGAAGAACCTTGTGACCGCGACGTTCGAGCTCCCCGGCCTGAAGAAGGAGGACATCGCGATCGACGTGCACAACGGCCGTCTCACCGTCTCCGGAGAGGTCAAATCCTCGTCCGAGGAGAACAAGGACGGCTGGGTCGTGCGCGAGCGCCGCTCTGGCCGCTTCTCGCGCGTCCTGCCGCTCCCACAGGG…	1.76667	9.98667	6.03386	2.59308
gene00416		Scaffold1	1327167-1332651	ATGAAGGGCCTCAAAAAGTCCCTCGTACGCCCCGAGCCCTGCCTTTTTGCACGCCCCGTCTCCTGATTTGATTGCAATCTCAGAGCCTGACTCGCAAGAGCTCGAGCGAGTCCTCCAAGTCCTCGCGCAACGCCCAGCCGCCCGCGCCCCCGCCCAACAACGCAAAGCCCCAGAACAATGTCCCGCCCATCGCAGCTCAGTTCTCCGCCAACGGCGCGCCCGTCCAAGCCGCCTTCACAGGCCGCCCCAACAACACCCAGCCCGTCATCTCGACCCAGCAGCAGCCCCAGGACCGCAGATACCAGTCCGCCGACAGGCAGTCCCCCGTGACCCCGCCATCGTCGTCGTCTCCTCCGAGATGGCTCCTGACCATCAGCCGGCTCCCAGGCATCTCGGGTC…	1292.81	313.51	0.241067	-2.0525
gene01704		Scaffold2	2782081-2782614	ATGTCTCTCTTCTGGACCTCGTTCCCCTTCGACGACGTCGACCGCGTCTTTGACGAGGCCTTCAATGGCTTCCTCCCTACTGGCGCTAGCAACCGCCCACGCATCCAGGGCAGCAGCAGCGATGACCAGTCGCAAGTTTCCCGTAGCTTCAGGCCAAGGTATGTTCCTTGTCTCGTTAGCTGCGCAAAGTGACTTCATGCTAACACCTGCCACAGGATGGACGTGCACGAGAACAAGGAAAATAACCTTGTGACCGCGACGTTCGAGCTGCCCGGCCTGAAGAAGGACGACATCACCATCGACGTGCACAACGGCCGTCTCACTGTCTCGGGCCAGGTCGAGACCTCTTCCGAGGAGAACAAGGACGGCTACCTCGTGCGCGAGCGCCGCTCTGGCAAG…	3.07333	10.2667	3.14444	1.6528
gene06102		Scaffold10	379766-380272	ATGTCGCTTTTCTGGACGACTTTCCCGTTCACCGACTTTGAGCGCGCCTTCACTGACGCGTTCAACGACGGCACCGTTGCTCGCATTGGTGACAACGGTGATAAGGCACAGGGCTTCCGACCCAGGTAAGCAACTCTCTGCGCTACCGCTTCAGGAAGCGACGAGGAATGCTAACGCTGTCGCCGCAGGATGAATGTGCACGAGAACAAGGAGAACAACCTTGTGACCGCCACGTTCGAGCTCCCGGGCCTGAAGAAGGAGGACATCGCAATCGACGTGCACAACAACCGGCTGACCGTCTCCGGCGAGGTGAAGTCCTCTTCGGAGGAGAACAAGGACGGCTGGGTCGTGCGCGAGCGTCGGACCGGGCGGTTCTCCCGCGTCCTGCCCCTCCCGCAG…	2275.97	38483.5	16.6262	4.05538
gene07887		Scaffold14	599075-600123	ATGCTCGGTCTGGTTGTCAAAGCGCTGGCTGCTGTCCTCCAATGCGCCGCGATGTACTACGCCCTGGCGCTGCTCAAGAACGACCTGGCCAACGACGAAGCCCACCGGTTGGCCAGCTTACGGAACCAGGGCGAGCAGAAGCGCGGCCAGTGCCCTGTATGAGCAGCTCCTGGTCGCTCAAGTCGAGTCAGAGAGCGGGTCGGAGCAACTCACGTGACCGAAACGCGCGTCCTTCGGAATCGGAAGATTCCAGAACATCACACGCGTCCAGGGTTACGCGTCGAGCACACGCGTTCCCTGCTGCTCGCGGTATAAAAGCCAGCTAGAAGCTACTGCAGTACTGTACAACATATTCGTTGCCCTGTCTCACATCGCCTACCTATTTCGCCATGGACTTCT…	16.03	7.19	0.436359	-1.19641
gene01316		Scaffold2	1496570-1497105	ATGTCCCTCTTCTGGACCTCGTTCCCCTTCGACGACGTCGACCGCGTCTTCGACGAGGCCTTCAATGGCTTCCTCCCTACTACTGGTGCCAGCAACCGCCCTCGCATCCAGGGCAGCAGCGATGACCAGTCACAAGTATCTCGTGGCTTCAGGCCAAGGTAGGTTTCTCCTCTCGTTTGCTGCGTGAGTGGAATAATCATACTAACACTTGCCATAGGATGGATGTGCACGAGAACAAGGAAAACAACCTTGTTACTGCGACATTCGAACTGCCCGGCCTGAAGAAGGACGACATCACCATCGACGTGCACAACGGCCGCCTCACCGTCTCGGGACAAGTCGAGACTTCTTCCGAGGAGAATAAGGACGGCTACGTCGTGCGCGAGCGCCGTTCTGGCA…	2.37333	10.5067	4.39933	2.13728
gene07500		Scaffold13	624609-625123	ATGTCGCTTTTCTGGACCGCGACTTCCAGCCCGTTCGCCGACTTCGAGCGCGCCTTCAATGACGTGTTCAACGGCAACCTCCCAGTTGGCCGCGTCGGCAACGGGTCTAACGATACTGCGTCTCAAAGCTTCAGGCCAAGGTACGTTATAGCATCTACTACTCAGTTGTCGGGCGTGCGTGCTGACTCCTCTGCAGGATGGACCTCCACGAAGACAAGGAGAAGAACCTCGTAACCGCGACGTTCGAGCTCCCCGGCCTGAAGAAGGAGGACATCGCGATCGACGTGCACAACGGCCGTCTCACCGTCTCCGGAGAGGTCAAGTCGTCTTCTGAGGAGAACAAGGACGGCTGGGTCGTGCGCGAGCGCCGCTCTGGCCGCTTCGAGCGCGTCCTGCCAC…	1.37667	18.7067	14.1387	3.82158
gene00523	htpG	Scaffold1	1662105-1666346	ATGCACAGGTTCTTCCAGAGAAACGAGTCGCTGGTCAGCGTGTGCCAGCGCCGGCTGACAGCGCCGCATGCGAGCAGAGAGGGGCAGGTTGGCTGGACGTACGCCGATAATATCGCGCTGAAGGGACTGAGAAATCTGCCTGTGGACCCGCACAAGGCAGTCGCGTGGAAGGGACATAAGCAGCTGCAGCGCGAGCTGCTCGCGTTGCTCGACGTCCGCGTTGTGCATGACGACGAGCCTGTGGTGCCGGCAGAATGCGGCGCGTTCGTGGTTGTCATGTCCGAGTCCGCTCATTGGTCGCCGGCCCGCCACGCGCGCGCGCTGCTGGCATATCTACTGCTGAAGCTCAAGTTCTTTATAATATGGGTGCTCAAGGCGGGTCCCATGCCGCAGCACGTC…	531.477	246.15	0.458296	-1.12565
gene07494		Scaffold13	609760-610274	ATGTCGCTTTTCTGGACCGCGACTTCCAGCCCATTCGCCGACTTCGAGCGCGCCTTCAATGACGTGTTCAACGGCAACCTCCCAGTTGGCCGCGTCGGCGACGGGTCTAACGATACTGCGTCCCAAGGCTTCAGGCCAAGGTACGTTACATCATCTACTCCTCAGTTATTGGACATGCGTGCTGACTCCTCTGTAGGATGGACCTCCACGAAGACAAGGAGAAGAACCTCGTGACCGCGACGTTCGAGCTCCCGGGCCTGAAGAAGGAGGACATCGCGATCGACGTGCACAACGGCCGTCTCACCGTCTCCGGCGAGGTCAAGTCGTCCTCTGAGGAGAACAAGGACGGCTGGGTCGTGCGCGAGCGCCGGTCGGGTCGCTTCTCGCGCGTCCTGCCGC…	340.183	963.933	2.79615	1.48344
gene07492		Scaffold13	606563-607077	ATGTCGCTTTTCTGGACCGCGACTTCCAGCCCGTTCGCCGATTTCGAGCGCGCCTTCAATGACGTGTTCAACGGCAACCTCCCAGTTGGCCGCGTCGGCGACGGGTCTAACGATACTGCGTCCCAAGGCTTCAGGCCAAGGTACGTTGTAGCATCTCCTCCTCAGTTGTCGGACGTGCGTGCTGACTCCTCTGTAGGATGGACCTCCACGAAGACAAGGAGAAGAACCTCGTGACCGCGACGTTCGAGCTCCCTGGCCTGAAGAAGGAGGACATCGCGATCGACGTGCACAACGGCCGTCTCACCGTCTCCGGCGAGGTCAAATCCTCGTCCGAGGAGAACAAGGACGGCTGGGTCGTGCGCGAGCGCCGGTCGGGTCGCTTCTCACGCGTCCTGCCGC…	7.27	47.2933	6.33798	2.66402
gene01868	htpG	Scaffold3	579287-581874	ATGGCCACTGAAAGCTTTGGATTCCAGGCTGAGATCTCCCAATTGTTGGATTTGATCATTAGTGCGTGACCTTGCTCGTGCCCGCTGCTGGCGCTGGTACTGAGTGCTGGCTGGCAGACACGTTCTACTCCAACAAGGAAATTTTCCTGCGCGAAATTATCTCGAACGCGTCCGATGCGCTTGACAAAATCCGGTACCAGTCGCTGACGGACCCGTCTGCGCTCGAGAGCGAGCCCGAGCTCTACATCCGCATCACGCCCGACAAGGAGCACAAGGTTCTCACCATCCGCGACACTGGTGTCGGCATGACCAAGGCCGACCTCGTCAACAACCTCGGTACCATCGCCAAGTCCGGCACCAAGGTCTGTACCTACGCTGCTCACACTCGTTCATTGTGCT…	1417.62	559.633	0.393537	-1.34543
gene07478		Scaffold13	559034-559538	ATGTCGCTTTTCTGGACTGCGACTCCCAGCCCCTTCGCCGACTTCGAGCGCGCCTTCAATGACGTGTTCAACGGCAACCTTGCCCGCATCGGCGACGGGTCTAACGACACTGTGACCCAAGGCTTCAGGCCAAGGTACGTTACATCATCCATCACTCGTCGGACGTGCGTGCTGACTCCTCTCTAGGATGGACCTCCACGAAGACAAGGAGAAGAACCTCGTGACCGCGACGTTCGAGCTCCCCGGCCTGAAGAAGGAGGACATCGCGATCGACGTGCACAACGGCCGTCTCACCGTCTCGGGCGAGGTCAAATCCTCGTCCGAGGAGAACAAGGACGGCTGGGTCGTGCGCGAGCGCCGCTCTGGCCGCTTCTCGCGTGTCCTTCCGCTCCCACAGGG…	11.8867	30.0733	2.48236	1.31171
Table S7.2 Arachidonic acid metabolism
Gene ID	Gene name	Chrom	Location	Gene	NT	HT	FC	log2FC
gene02367		Scaffold3	2244414-2245304	ATGGCGCAAGCGACCCGCTACGAAATCTCGTACTTTCCCGTGCCGGCGTTAGGCGACCTGCCGCGGATGATTCTTGATGTCGCGGGAGCACCGTATGAGAACACGTTCTTCAACTACGTGGGCAACTGGCCCGGCCTCAAGGAGTCTATGACATTTGGCAGGGTCCCGAGGCTCACGATTCACAACGCGGACGGCACCAAGAAGGTTCGTTGCCACCATCACACTCACCGCACCACCGCGCGCTGCTTGTTCCTGCTAACAGCGCAACGTCTACTTGCAGGAGCTCTTCGAGTCTTTCGTCATCGAGACGTATCTGGCAGAGACTTTGTCCCTCGTGCCCGGGACCGACGCGTTCTCGCGCGCCGAGTGTTTCAGCGTCGCGTCTTCGCTCAAGGACAT…	0.683333	5.62667	8.1811	3.03229
gene02360		Scaffold3	2230448-2231299	ATGGCGCAATCGACTCGCTACGAGGTCACGTACTTTCGCGTCCCGGCGTTAGGCGATCTGCCCCGCCTGCTGCTGGAGGTCGCGGGGGCACCGTACGAAAATACCTTCTTCGACTTCCAGGGCGACTGGCCGAGCCACAAGGAATCGATGACCTTTGGACGGATCCCCAGACTCACGATTTACAGTCCAGATGGCACCAAGAAGGTACGCTGCTACGATCGAGCTCGATTCCTTGTGTCAACTGAGAATACTGCAGGAGCTCTTCGAATCGTTCGTCATCGAGGCGTACTTAGCAGAGACACTCTCCCTGGTCCCTGGACCCGACGCGTTCTCCCGGGCCGAATGTCTCAGTGTCTCCTCGTCCCTCAAGGATATGGACGAGAAGGTCCGCGCTACGGG…	401.91	130.93	0.322786	-1.63135
gene11676	PLB	Scaffold33	238963-239919	ATGGCCCTTGGAGACAGCGTAACTGCGGGCTGTTTCGCCAAAGGTCGGCCAGGGACCCTTGGCGTGTCGCGGACGAAGATGGCCACTGACACACCCGCTGATCAGGCATACAGGATGATGTCCTCTCTGATTTTGATGAATGGCGTGGTGTCTCATTCGCTGCTGGAGGAGACCCTGGCGCTTTGACAATTCCCAATGTGAGCATTCGCACGGAACCCATTTCTCGACTGATACGACCAAATCCAATGCTAGTTCATCGGTCATTACAACCCGGTTGCGCAGGGCGCGAGCATCTCACATCACGGCTTGGAATATTGCAGTGGTCTGTACCATCGCGCAGCGTAGTTTAATGAGAGAGACCTGACACAGCTTAGGGACTACATGCCCATCTGGTTCGTT…	87.52	321.743	3.64328	1.86524
gene01909	PLB	Scaffold3	679931-683018	ATGGTTCCTCAGGCCCTCGTTGCGCTCGCGCTGCAGCTGATCACGCTCGCCGTCGCGTCGCCCGTCATCGAACGCCGCGACACGTTCGTGACGGACGTCGCCCAGTGCCCGCTACTTCCCAAGCGCGCCGCGGCGGAGAAGAGTGTGCACAACCTCCGCCCGGACGAGTTCGACGTCGTCATGGCTGTCGGGGACTCCATCACTGCCGGCGCGTTCGCGAAGGGTACGTTGCTCCCTATGTATCTCGGCGACTCCGAGTCAACACCGTGCTCATTGCGGTGAATGTAGGGATCCAGTCCGGTTCGTTGTCGACGTTCGATGAGTGGCGCGGCGTTTCGTACGCTGCGGGGGGCGATCCTGGTGCTATCACTCTGCCTAACGTGCGTTCTTGCCTTAGAT…	1.31333	9.98	7.66159	2.93764
gene05774		Scaffold9	963541-964763	ATGGACGAGTCATTGTACAAGGACGCCGAGGTCGCTGGCGCAACGTACCACTACTTCGCCTCTCCGCCGGAGAACGGCCTCCCGACGCTGCTCTTCTGCCATGGCTGGCCGTCCACATCGTTCGACTGGCGATTCCAAGTGGCGTACTTCGTCCATCTCGGCTATGGAGTGGTCGCGCCGGACATGCTGGGCTATGGCGGCACCGCTGCTCCATCTGAGCTGGACGCGTACAGGTCACGGAGATACTGCAAACAACTTGTCGCACTGCTCGATATCGAGAACGCCGAAAAGGTTGTGGCGATCGGGCACGACATGTACGTGTAAATCGTTCGATGGGAGTGGGTGCACCTGCTCATTTGTGCTATTGTAGGGGTTGTCTAGCCGTCTCAAACTTGGCAA…	1.07	4.04	3.74244	1.90398
Table S7.3 Arachidonic acid metabolism
Gene ID	Gene name	Chrom	Location	Gene	NT	HT	FC	log2FC
gene11676	PLB	Scaffold33	238963-239919	ATGGCCCTTGGAGACAGCGTAACTGCGGGCTGTTTCGCCAAAGGTCGGCCAGGGACCCTTGGCGTGTCGCGGACGAAGATGGCCACTGACACACCCGCTGATCAGGCATACAGGATGATGTCCTCTCTGATTTTGATGAATGGCGTGGTGTCTCATTCGCTGCTGGAGGAGACCCTGGCGCTTTGACAATTCCCAATGTGAGCATTCGCACGGAACCCATTTCTCGACTGATACGACCAAATCCAATGCTAGTTCATCGGTCATTACAACCCGGTTGCGCAGGGCGCGAGCATCTCACATCACGGCTTGGAATATTGCAGTGGTCTGTACCATCGCGCAGCGTAGTTTAATGAGAGAGACCTGACACAGCTTAGGGACTACATGCCCATCTGGTTCGTT…	87.52	321.743	3.64328	1.86524
gene05307		Scaffold8	1285292-1287467	ATGGATCGTCTCAGCGCCGCAACCTTGACTTCGCACTTGACTCAGACCGAGCTCTTCGGGTTCGTACCGGACGACGTCCCCGTGCAGAAGCGTATCGAGATCGAGTACCTCCGTGCCCAGGCCATTGCCCGGCAATACAGTACGCATATACTCTTCGTCGGCGGTACTACCGGAAATCTCGGGACTGACGAATTCCTCGCCGCAGAGCTCACCGCGGACGATGTCCACACGCTCTCCGACCGATTCTGGGCCATGCACTTAGACAACATTACCGGCGTCGACGTTGCCCCTATGGCGCTTCTCACCATCCAGTACAATCTCGCGGCTGGAACGCTGGCTCCATGGGCGGCCAAACGCCCTGAGTTGCGCCCGATCCTGAAGAGGATTCTGGACTTCGAC…	0.0733333	3.64333	48.8297	5.60969
gene01909	PLB	Scaffold3	679931-683018	ATGGTTCCTCAGGCCCTCGTTGCGCTCGCGCTGCAGCTGATCACGCTCGCCGTCGCGTCGCCCGTCATCGAACGCCGCGACACGTTCGTGACGGACGTCGCCCAGTGCCCGCTACTTCCCAAGCGCGCCGCGGCGGAGAAGAGTGTGCACAACCTCCGCCCGGACGAGTTCGACGTCGTCATGGCTGTCGGGGACTCCATCACTGCCGGCGCGTTCGCGAAGGGTACGTTGCTCCCTATGTATCTCGGCGACTCCGAGTCAACACCGTGCTCATTGCGGTGAATGTAGGGATCCAGTCCGGTTCGTTGTCGACGTTCGATGAGTGGCGCGGCGTTTCGTACGCTGCGGGGGGCGATCCTGGTGCTATCACTCTGCCTAACGTGCGTTCTTGCCTTAGAT…	1.31333	9.98	7.66159	2.93764
Table S7.4 Tyrosine metabolism
Gene ID	Gene name	Chrom	Location	Gene	NT	HT	FC	log2FC
gene05190	gabD	Scaffold8	939196-941493	ATGGCAGCAGCAGCGGTAAGTGCTCCGGACACAAACCTGCCTCTCACCCCGGGCCACTGAGATTTTACTTCATCTACAGTTCGGTTTGAAGGACTCCAGCCTCGTTCACACGCAGGGCTACATCGACGGTAAATGGCTGGACGCAAAGGACGGGACAACGTTCGACGTGACGAGTACGTGCACATGACCTCCAATTCGACAGTGTGTTCAACTGTTAAAGACCCCGCAACGGATGAGGTGCTCGGCGCGGTGGTCGACATGGGCGTCGCGGAGACTAAGGACGCTATCGCCGCGGCAAGCGCTGCGTTCAGGACCTGGTCTCAAACGACGGCGGCCCACAGGCACGACCTCCTCATGAAAGTATGGCCATTACCTTTGGTCGCGCATGTGCGAACTCCT…	102.927	10.5233	0.098691	-3.34094
gene02112	adhP	Scaffold3	1345107-1348031	ATGCCGCCCACAATGAACTCTGCATCGACAACGCTGTCAGTGTCTTCCCAGCAGCCCACCACGACGGCGGAAGCGAGCACGTGGAATTCCGACCACGGACTCGGATACGTCTATATCGACGACCGCGTCATACTCGGCGTGGCCTGGGCCATCTTCGGCTGCGTCTTCCTGCTCGCCGTCTGGGGCATCGTACGATGGACAGGCAGCCTGCGCCGGGCGCAAGAGAGACTAGCCCGCGCGAAGCGAAAGCTGCTGTGGTCTACTCCGAAGGAGAACTCAGCGGGAACGTGCCGCCGCGACTGCATGCGATGCGAGCTCCAGCTCGCAAAATGGAACGCCGTACGGAACGCTGCACTGGCGGCTGGCGTCGATGCAGATAGCTACGCTGGGTCGATATCG…	60.92	162.727	2.65538	1.40892
gene04977		Scaffold8	229802-232317	ATGTCTACCACCAAGAACGTCCAACATGACATCGTCATCACCGGCGTCCCACCCGCGCCTGGATTTCAACCGACAGCGTACCCGCGCCGCCCCATCGAAGAGCTCGTTAAGGACGAGAAGCAGTTCGCACTATATGTCCAGGCGATGGGTGCGTCTAGTTCGCCGTTGCTCTATACTGCATGCAGCTCTGTGGCGAGCTATGTGCTAATTTTTTCCTCGCATCGTAGACGTGATGCAGAAAACGCGCCCGGACGATATGCTCTCCTGGTTCCAAGTCGGCGGAATCCACGGCGCGCCCGCCGAGCCGTGGGACAACGTCGCGGGGCTCGCAGGTGGCAACACCAGCTGGGAAGGATACTGCACGCACGCGTCTGTCCTCTTCCCCACTTGGCACCGGCC…	138.297	363.557	2.64475	1.40313
gene04978		Scaffold8	237504-237989	ATGTCCGGGTCCGTGCCGCGCGTTGAATGGTCGCTGCACGTCGTCTCCAACGAGCACGCGCTCGGCCAGAGCTACACCGTGCTCTTCTTCCTCGGCGACGTCCCTGCGTCCGCCGAGAACTGGCGGGAGGCAGACTCGCTTCTCGGGCTTCACGTCTCGCATACGCGCACAGGACACGTTCCGCCGGAGCAAGACCGCCCAATCGAGAGCTTCATTCCGCTGCAGAAGGCTCTCAAGCGCTGCTCGGGCCTGCCTAACTTGACGCCGGACGTTGTCGTGCCGTACCTCCGTAATAACATGCATTGGAGAGTTCAGAAGGTGTGCACGATCTCGCGCTAATTTGCCTGGCACAGCGTCTCACTGTTCACTGTGAAGATGGATGGCGAGGTTGTTGACAAC…	69.3567	212.467	3.00698	1.58832
gene02817	hpaI	Scaffold4	1221340-1222340	ATGCTGCAAGTCGCCCACCCGCTGCTCAACGCCCTGCGTGCATCCAAGCCCGCGTTCGGCGCGTGGCTGACGCTCGCGAACCCGTCGCTCGCGCGCGCCGTCGCGCTCTCGCACCCGGCCATCTCGTGGGTGTGCCTCGACGGCGAGCACGGCCTGTTCGGCCTCGGCGGCCCCGCAGTGCACGACACGCTCTCCGTGCTCGCAGCGCTGCCCGGCGGCGGGCCTACGGCGTACATCCGCATCCCGGCCACGGCGGAGACAGACTCGGTCGGGTGGCAGGTCAAGCTCGCGCTCGACTCTGGCGCGCGCGGCGTCCTCGTGCCGATGTGCCCCGACGCCGCGGCGGCGAAGCGCGTCGCGCAGGCCGCACGCTTCCCGCCGGTCGGCGTCCGCGGACTG…	1091.92	509.073	0.465131	-1.10429
Table S7.5 Amino sugar and nucleotide sugar metabolism
Gene ID	Gene name	Chrom	Location	Gene	NT	HT	FC	log2FC
gene06347		Scaffold10	1230192-1232662	ATGAAGTTCATCATTGCTGCTCCTTTCCTTGGTTCAGGTTGGTGGCACAATATCTCTCGAGTTGTGCTTGGAGACTGACGATACACGCCAGGACTCGTATTCTCGGCTGTGGTCGCTCAGGACATTATGAAGCTTGCCAACATTGCGACCTACATTAGCAGCGGTAAAAGCTTCATAGGAATAACGCAACCGATGTGACCATCGTTAATGACATTCCAGCTGCTATGCTCATCACGCCTGCTCTCGCGCAAGACGACAACGTGCCCCCGGGATATATTTTCCCGCCCGGCACACCTGTAGACGAGGACAACCTCAGCATGACTGTCGCGTTCGATGCGGACGTCGATGAAGGCGCAGCTAAGACCAGCAGCAGCTTCCCGATGACCACAAGGAGGATGA…	2.58	5.35	2.06767	1.048
gene02046	abfA	Scaffold3	1149987-1154206	ATGCTCTCGTCCGTCCGTTCCTCAGCCCGCCTGGCGCACGATGCGTTCGTGCTCGCGCGCTCGTTGTCGACGTCGCTGCGCCGCGGGCAGTACCAGTTCGACACGCACCATTTCGTGCAGCGGCTGGAGCGCGAGGGTCTGTCGCGCGAGCAGGCCGAGGGCGTCATGTCTGCGCTGGCGTCCGTCATCGAGGAGGCAGCACGCAACATGACGGCCAACATGGTCACCAAGGCCGACCACGAGAAGGTATGCCGCCGACGTCGACGCCGACGACCCCCAGCTGAACCCGTCGCAGCAACACTACACACAGAAAGTCGATTTTGCCCAGCTCAAGTCCGAGCTGCAGCTGCTCGAGAAGAACGACGTCGCCCAGCTGCGCGCAGAGAACGACCGGCTGCT…	13.39	38.2733	2.87659	1.52436
gene11712		Scaffold33	342671-343872	ATGCCTTCTTCATTCTCCATTTCTATTTATCTTTCGCTCGTCGCCTCCGCGTACGCCGCGGCGAACTTCTCGCGTCGCGCAGACGGAAGCGAGTTCCAGGCCGACGCTAGCATCGACGTAGACGCGATTTACAAGGCAGTCCAGGCCGGCGTTGCTGCCAAGAACAACGTGCTCGCGACATACCCGACGTGCAATGCAGACTGTGACTCGTCGACAGACGTCGACCTCATCGGCGACTGGATGGATCTCAGTGGCGTCGAAGGCACATTCTCATTCATGGCCGACATGGACGTGGACTGCGACGGTGTAGCTTGGCAGTGTCCTGGCAATCCAGATGGCCAGCCGCAGACGAGCTTCGGGGCCATGGACGCCACGCAGGCGCCTTGGTACGTGATTCCC…	24.6767	56.9433	2.29273	1.19707
gene11670		Scaffold33	217482-219730	ATGCTGTCTTCGTGGAAGTCCCTCCTGTGCTTCGCGCTTTTCAGCACTGCCCACGCCGCCGTCATCCGGACGCGCGTGCGCGGTGAGGAATCGCAGCTCGACAGGCGCGCTGCCGCGACAGGCAAAGTGCAGTTCGGTTACTACGTACGTTTGCCACCGATTTACTGCAAGATCTCCATGCTGATACTCATCAGGTCAACTGGTGAGGATGATGCTCGCCGATAGCTGAACAATCTCTAAACCTTTGCTTGTTCGTCGTATAGGGCCATCTATGCTCGGTACGTTTCTCGCCTGATTGCGAAGGAGTACGACTAACGCGATCAAAGGAATTTCCGTGAGCAATGAATTGCCTCGTGCAGCCATTCGATGCTGACAACCCGCAGAACCCGATGACATGGA…	11.3433	36.4033	3.20318	1.6795
gene06991		Scaffold12	349957-354691	ATGGGAGGCTGCCCGCACCCCACGCTCGGTCTCGCGCGCACGAAACTCGACATGGTTGCAACCGTCACCGTTCCCACGCACACGACGGCGTCCTCCCCGCGGCCGCACATTCTGTACACTGTGCGCATCAAGGACGGGGCCAATGAGACTGTCATTCAGCGCCGCTATTCCGACTTTGTGGCCTTGCACTCCGGCCTCGCCGATCCATTCTCCCTCCCGCCTAAGCGGATCCTGACCACCTCCTTTGTACCCTCGGCATGGCTGGACGACGCACTCATCGCAGAGCGCAAGGCTGGTCTCGCAGCGTACCTCGCCGCCGTGCTGCAGGCCGGTGAACAGTACGCGGAGCATCCCGCGCTGAAGACGTTCCTGCAAGGCTCTCAGGCGTCAGCCAGCCGC…	1.78667	5.77667	3.26778	1.70831
gene06859		Scaffold11	1398095-1399647	ATGGTCTCACTCACTTTCGCCGCCCTCGCCCTCGCCGCCGCCTCCGTGGCCTCCGCCGCCCCTCACGACCACTCCGACCACGAGCACGTCGGCCGCGGTCTCGGACTGGGCGCCTGGTATCAAGAACGCGCAGGCGCCGCAGAGCTCTTCCGTCGCGCGCCAGGCGACCAACCAACGGTCGGCAGTCCCCGTGCGTGGCAATAGCGCCCGACACCGTGTTTCGCGGCGGCTGAACCGTGTTTTTTTCTGCAGAATGGCTCGCTCAGTACCCTCCCGCGGGCGGCGTCCCGTCGCAGAACGAGGCCGACATCCCTGCCGCCTGGCTCGCTGCCTATCGCGCTGCCAAGGCCGCCGGCAAGATCCCCAACATCCCCGTGTCGCAGCTGCAGCCCGCCGGCT…	123.307	48.2167	0.388424	-1.3643
gene01982		Scaffold3	919841-921939	ATGCGTCCTCTTGCTGCATTCGCCATTCTCGGCCTCCCGCTGCTGACCATTGCCCAAAGTCTGTTCCACGCCCATGCGTCGCAATGAGCTCGCTGACGCCTTACTGGCAGCTGGCTGTGGCTCCCAGAACAACGGCGTTCTCTGTCCTGGATCGCAATGCTGCTCGTACGCTACGGCCCTACAGCTTTCTCTGCTATCTACAACTCTGACTCGCTTCCTTAGCCAATTCGGTTTCTGTGGGACGACAGCAGAGTTCTGCTTGACCTCTAAGCGTTGCCAGAGTAAATGCGTACGTCCCAGTCAAAGCGCTTGAGAATTGCCGGACTGACAGACCACGTAGATTGACGATGGACCCCGTATGTTGGCTTGAGTGCTGCACCATTGTGTCACTGATACCGG…	68.29	29.2233	0.421404	-1.24672
gene05174		Scaffold8	883212-888415	ATGCCTCAGAAAACTACAGAGCAGAAGGGAATCGACATATTGTACATGTCCATGACGCTCTTGTGTCAAACATTCTTCTTTGGTATGTGCATAGGTGGTCCCTCGGCGCTGTCACCATTTTGTTGACTCAACGCAGGCATATTCTCTGTTCTCATGCCGCTGGCAATCTACGGAGTCCGGTATGTCCTTCAAAACGGGAGAGAGTATCCCATCCATTGACGCATCGAGGGTCTCAGAAAACGCGGCGGGAGAACAGCCCGAGGCCGTCCGAATTGGTTGCTATACTGCACCTTATTTGAGTATAGCCTTTCTGCAGCATTCTGGGCCGCCTCGACGGCAGGCGTCGCACAGAGGATCCAGGACTACTTCATACATCCTCCCGATGTTGCGAAGCCCAGA…	21.6333	44.0733	2.04768	1.03399
