# Supplementary material for: Transcriptomic, and metabolic profiling reveals adaptive mechanisms of Auricularia heimuer to temperature stress
Source: PeerJ. 2025 Jul 21;13:e19713. doi: 10.7717/peerj.19713 (PMC12288747; doi:10.7717/peerj.19713)
Supplement: Supplemental Information 15 [file peerj-13-19713-s015.xlsx]

## Sheet: Supplemental_Table_S8
Table S8.1 Ribosome
Gene ID	Gene name	Chrom	Location	Gene	NT	EHT	FC	log2FC
gene07209	rpsL	Scaffold12	1054836-1055455	ATGCTTTCCCTCTTCGCGCGTGCAGCAGCGTCAGCGAGCACGCGGCTAGCTCCTGCAGCACGCCCCATTCGTCCCGGTCCTTTGCTGCTGCGGCAGGCACCAGCATGCATAGCGTTTCAGCAGCAACAGCGCTGGGCAACGCTTAACCAGTCCATAAAGCGCAAGCCGCCCAAGAAAACGCGGCTGTCCAAGTCGCCCGCTCTCAAGGGCGCGTATCAGCGCAAGGGCGTCGTGGCGTCCATTGAGATCCGCAAGCCGAAAAAGCCCAACTCGGCCCAGCGCAAGGTCGCCAAGGTCAAGCTCACCACTGGCAAGACCGTCACTGCCTACATCATGGGCGAGGGCCACAATCTCCAGGACCACTCAGTTGTCCTCGTCCGTGGCGGTCGCGCGCAGGAC…	168.22	203.4	3.73887	1.9026
gene05876	RPS25	Scaffold9	1242004-1242526	ATGGCCAAAGCTAAAGCGGCAGCGTCGACAAAGCCCAGTGGTGGCGGCAAGTCCGCCAAGAAGAAGAAGTGGTCGAAGGGCAAGGTCAAGGACAAGGCCCAGCACGCCGTTGTCCTCGACAAGGCGACGTACGACCGCATCAACAAGGAAGTCCCGACCTTCCGCTTCATCTCGCAGTCCATCCTCATCGAGCGCCTGAAAATCGGCGGTTCGTTGGCACGCGTAGCCATCCGCCACCTCGAGCAGGAGGGCCAGATCAAGCGTATTGTGCACCATTCGGGCCAGCTCATCTACACACGGGCAACAGGCGCCGCCGCCGAGTGA	6018.15	3832.09	2.11017	1.07736
gene02503	RPL32	Scaffold4	276895-278851	ATGGCCTCTCTCGCGCTTCCACAACTCGCCCGGCCGTGGCTCGCGCCGCTCCTGCAACGATGGGTCGCGCCGCTGTCGTTACTTCCCGCGGCGATTGCGCTGCCGTCGCTGCGCCCGCTGCTCGAGCTGCTCCCGCCATTCGTGCTCGCAGTGCCCAAGAAAAAGGTCTCGCACTCGCGTAAATCCATGCGCGAGGCGAATAAGGGCCTCAAGGACAAACTAAGTACGCGCACATTTGCTCATGCTCATGCTTCTTTTGCCAACGCGTCGCAACAGACCTCGTCGCCTGTCCAGCGTGCGGCATGCCCAAACTCGCGCACAATATATGTCCGTCGTGCTATCAACAACTCGCAAGCGCGTGGAAGGCCCAGCTACGGCAACGGGCAGCTGGTGCGGACT…	691.767	559.437	2.38394	1.25335
gene07626	RPS28	Scaffold13	1043483-1043854	ATGGTATGCTGCTCGCAGCGACTGCCGGATGAAGCGGTACTCATATTATCGCAGGATGCATCTGCAAAAGTCCCTGTCAAGCTCGCTCGCGTTATGAAGGTGCTCGGCCGCACCGGCTCGCGTGGAGGTGTGACCCAGGTCCGGGTTGAGTTCATGGACGACTCGTCGCGGTCGATCATCCGCAACGTGAAGGGCCCCGTGCGCGAGAACGACATCCTCGCTCTGCTCGAGTCTGAGCGTGAGGCTCGCCGTCTGCGCTGA	345.927	289.983	2.92452	1.5482
gene03474		Scaffold5	1206880-1207451	ATGTCTTCCGGTCTCGCGCGTCGAATACCGTCCGTACAGCGCGTCTTCGCGAGACCACTAGCGCGACATGCTAGCACGTCAAGCTCGGCGGCCAGCAATGCGGGACGGGCAGCACCCAGCGCACCCTCGCAACCCGAACCTCTCACGCATTTTCGCATCACGCTGCGCCGGTCTGCTATAGCGCTGCCTGAGCGGTACCAGGCGACGTTGACGACGCTGGGCCTGCATAAACGCCTGCAGACCGTGTACCACCCGCATTCGCAGTCGGTGGCGGGCAAGATCCTCAAGGTCAAGGAGCTCGTCGAGGTCGCCAACGTCCCGGCCAGCGCCGTGCGCACCAAGGCCGAACAGCGTGCTGAGCGGAGGCCGCCGCGCGGGTATAGCGTCGAACGGCCCCGC…	225.693	213.827	2.89557	1.53385
gene02463	RPL19	Scaffold4	161047-161751	ATGGTCAACCTCCGCTCCCAAAAGCGCCTCGCCGCGTCCGTCGCTGGCGTCGGCAAGCGCAAAATCTGGCTGGACCCGTCCGAGCAGGCGGAAATTGGCAACGCCAACTCGCGCACGCACGTGAAGAAGCTCATCCGTGACGGCCGTATCATTGTCAAGCCCACCGTCATCCACTCGCGCGCGCGCACTCGGGACCTGCTCGCAGCCAAGCGCAAGGGCCGTCACACCGGCCCCGGTAAGCGCAAGGGTACCGCGGAGGCGCGCATGCCGACCAAGGTGCAATGGATGCGCCGCCAGCGTGTCCTGCGCCGTCTGTTGCGCAAGTACCGTGAGGCTGGCAAGATCGACAAGCACCTGTGCGTTGCCTCCGTCCAGTCATGAGTCTTCACCGGCGGCTTT…	1177.14	882.2	2.29049	1.19566
gene04045		Scaffold6	992256-994500	ATGTGGCATTACCGCTGCGGCCAGCGCTCGCCCGGACTGCGTTCAGGTGCGTCGCGTCTTGAAATTTCTGCGCGACCTAAATTTCAGGCAGCTGGACGAGCCTGACGAACCGCCTAGGGCGCTTCCGTACAGGCGCGTCGCAAGAAGGCAACCCCCTTGTTGAGGAGCCTCGTCCCGCCCCGCCGCCCTCATCGACGCCGCCGCCGCCCCGCCGCCTGCAAAGGACAGCACCGCGCTGGCCGCCTCGGACGAGAGGCCGCAATCCATTTTCGAGCGCGCCAAGGAGCGCGGCACGCAGCAGCCGACGCCTCACACGCGCTGGGGAAAGATGGATTGGGAAACGCACGAGGCCCAGAGCCACCACTTCAAGATCTCGCCGCGCAAGCTGAACAAGCTGGC…	32.3867	28.68	2.49876	1.32121
gene01376	RPS2	Scaffold2	1691773-1693058	ATGTCTCTGGCGGACATAACGTACGTGGGGCCGAGACTAGAGATTGGTTTGGTTAAATTCGACATGGAATTGAACGACATGGTACGCCAATTCGGTGGGTGAGCGGGTTAGTGTGCTGGTGCGTGTGCTGGTGCTGGTCAAGACCAAAGTGCCGAGTTGGTGCCGAGCTCCGTCTTTGCCGTCGAAACAGACTCCGCAACTCAAAACTCCTTCGAGCCCGGTCCTCGTCAACAAACCAAAAAACCGACGTCCCAGGTGCGTCCCGCCGTCTCAATGGCCGTCCCGGACACGCCGTGTTGCAGCAGTGTCCGGGAGCATGCTGTAGACTGTGTTATTGCTAACGTATAAAAAATCCCAGGCGTCAACTCTTTCTTCCTCAAGACTTCCGAAAAATCATGG…	587.193	457.63	2.25626	1.17393
gene06554	RPL40	Scaffold11	398886-399446	ATGCAGATCTTCGTCAAGACTCTGACGGGCAAGACCATCACGCTCGAGGTCGAGTCGAGCGACACTATCGACAATGTCAAGGCCAAGATCCAGGACAAGGAAGGGTGCGTTGCTCGTCGTCGTCGTCGGTGCCGGTGGCGAGCCGTGTTTCGTCACCGTCCGCGCCGGCTCCCAACCCCCTTCCTCCTTCCTCCTCGCCGTGGCTGACAACGACACCAGCATCCCGCCCGACCAGCAGCGTCTGATCTTTGCCGGCAAGCAGCTGGAGGACGGCCGGACGCTGTCGGACTACAACATCCAGAAGGAGTCGACGCTGCACCTCGTCCTCCGTCTGCGCGGCGGCATCATCGAGCCGTCGCTGAAGGTCCTGGCGTCCAAGTACAACTGCGACAAGCAGAT…	1062.92	716.243	2.11032	1.07746
gene03575	RPS24	Scaffold5	1548904-1549342	ATGGTGGTGGACGTGCTGCACCCGACGCGGCCGAACGTGTCCAAGGACGAGCTGGCCGAGAAGCTCGCCGCGACGTACAAGACGGACAAGAAGCTCGTCGTCCCCTTCGGCTTCCGCACCCAGTTCGGCGGCGGCAAGTCCACCGGCTTCGTCCTCATCTACGACTCGGACGCCGCCCAGCTCAAGTTCGAGCCCAAGCACCGGCTGATACGCGTCAGTCGCCCGCCCGCCTCTTCCGAATATCCGCTGACGCCCCCGAGCAGAAGGGATTGGCGACCAAGGTCGACAAGCTCTCGCGCCAGATGCGCAAGCAGCGCAAGAACCGCTCAAAGAAGGTCCGTCCTTCCCAGCCATTTATTCCCCACGCCATCCTAACCCGCTACTGTAGTTCCGGGGCAC…	140.113	121.613	2.62174	1.39053
gene05478	RPL18	Scaffold9	57913-59256	ATGGCGAGAGAACTCGGCCTCGAGGTCGCGCTCAGTGGAGCGGATGCTGAGGCCGAAAACGCCGAGCACGTTGGACGGATTTGGGTTCTTGGGCTGGCATTAGGCTCGCGAACACGTGGGTTGTGGCAACCTTGCGCGACGCACGATGGGGGCGCCGGTGGGGCGACGCGCGGGCGGCGGGCTGCGACGGCGGTACTTGTCGTCGCGCGGCGGGCTGCGGCTGCGGTAGCGCGGGCTGCGCGAGCGCGAGCGGCCGCGGCCGTTGGTGTCGCCGCGCACGCTCTCGGGCGCCGGCGGCGGGGCGGGCGCGTTCTCCTGGCTGCCAGTGGCCGGCAGCGAGTATGCCTCCGAATACGGGTCTGGGGCCTGCGCGGCTTCGTACTGGCCGTCGGACGCGGT…	387.77	285.33	2.13894	1.0969
gene07090	rplM	Scaffold12	654361-654997	ATGTCGCAGGCCGTGGGCAACACTGCGCTGGCGTACGCGCGCGTGTGGCACCACGTCGACGCGTCGGACCGCGTGCTGGGCCGGCTGGCGTCGCGCATCGCGCAGGTGCTCATGGGCAAGCACAAGGCCATCTACGACCCAGCACTCCTGCCCGCTCTGAACGTCACAGTCGACTGCGGCGACTACGTCGTCGTGACGAACGCGCGGCGCGTGATGGTCACCGGGCGAAAATCCGAGCAGATCGTCTACCGCAAGCACACGATGTACCCCGGCGGGCTCAAGGAGGTCTCGTACCGCGATATGATGCACAAGAAGCCGGATGAGATTATCCGCCACGCTGTGTCGGGCATGCTGCCCAAGAACAAGCTGCGCCAGCGCCGGCTCGACAGGCTGCGCATA…	78.3133	83.0433	3.34994	1.74413
gene10530	RPS20	Scaffold25	377012-382984	ATGCCTACCGACATATCTCGGGCGGTCAACCTCCTCCGCCCCGCCGCAACCAACAAAGCACTCCAGGCGGCACTGGACAGTGTGCTACTCTGGCTGAAGATTGTGCGTGCAACATTCCCAGCGCACTCTCCATGTGCCCTCAGCATGCATTGCACAGAACGATGGCAGCCCGATTGAAGACTATCAGCGTGTTCAGAAAGCGTTCGCATTGGATCTCGCCTCTCTGCATCGGGGATGCGCGCGCCAAGTCTTGCATCTATCCGCGCTCGTGTTCAGCGACGCAGTCGAAGAACGAATCCGACCTTCGCTTGAGAGCGACGAACCGACCGAGAAGTTTGAGCTCGTGCTCGCCGGTATAATTGCCGGGGCTGCTGTGAGTTCTAGTACGCCACGAATAAA…	90.41	109.553	3.44579	1.78484
gene01193	rpmH	Scaffold2	1048916-1049266	ATGAACGCCAACCGAATACGCACCCTCGCGTTCTCCACGCTGCGCACAGCGTCAAGGACGGCCGCCGCGCCGCGCCCCGCGTGTCGCGCATTCTCGCTTCTCACCCTGGCACCGCGGCGACCGACGGCTTCGCGCATGCTGGCGCCGCCGACCGCGACCGGCTCGAGTATTCTGGACATGGCGCTGCCCGCGATGCAGCAAGTGCGGTGCATGTCGCGCGGCGACGAGTACCAGCCGTCGCAGCGCAAACGCAAACGCAAGCACGGCTTCCTCGCGCGCATGAAGACCAAAGGCGGCCGCGCCGTCATTGCGCGCAGACGAAAGAAGGGACGCAAGTTCCTGACCCATTGA	133.937	143.46	3.61941	1.85575
gene03488	RPL11	Scaffold5	1246276-1246963	ATGGTCCGTCGTCGCGGCCGCAGGGCTGGGGGACTGTGTCGCTTATGCTCGTTGCTGCAGGCCGACAGCAAGACCGCCCCCACGAACCCCATGAAGGAGCTCCGCATTGAGAAGCTCGTCATCAGTGCGTCGCCGCCGCCGTCGCTGGCGCCTTGGCCATACTAATGTGACCCAGACATCTCCGTCGGCGAGTCTGGCGATCGTTTGACGCGTGCGAGCAAGGTGCTGGAGCAGTTGACGGGGCAGACGCCGGTGACCTCGAAGGCGCGGTACACCGTGCGCACGTTCGGCATTCGTCGCAACGAGAAGATTGCGGTGCACGTGACGATTCGCGGGCCCAAGGCGGAGGAGATCCTGGAGCGCGGCCTCAAGGTCAAGGAGTACGAGCTCCGTCGGCGC…	1494.37	1993.27	4.08173	2.02918
gene09572	RPL7	Scaffold20	497167-498151	ATGTCGACGTCGACAACGTGCGCACCCTCCTCCCCCAACCGTTGCGTGTGATGCTGACCCATATATGCCTGTAGCGTCCCGACGGCCGCTGTGCGTTAAAAACGCCTATTTTGCGCCTACCAGCCCGAGTTTCTGACGCGCCTTTGGATACAGCAAATCGAGGTGCCGGAGACGCTCCTCAAGAAGCGCAAGCAGAACGAGAAGGCTCGCGAGGAGAAGCTCAAGGCTGCGGCAGAGGCGAAGAAGGTGCGCCCAAGTCACTGGCTGGCTTGGCTGGTTGCTGACCGCTGCACACCGCGCGCAGGCTGCCAAGGCCCGCCGCAAGATCGTGTTCAAGCGGGCGGAGAAGTACGTGCAGGAATACGTCGCTAAGGAGAAGGAGGAGGTCCGCCTCAAGCG…	1305.88	888.197	2.02986	1.02138
gene03455	RPS27A	Scaffold5	1135558-1136215	ATGCTGACCCTCTTCGCAGTGCAAATTTTCGTCAAAACGTGTGCCAATTTGCCTTATTCTATGAGCTGCTGTGAACTGACGCGTGCTCTGTCAGCCTCACGGGCAAGACCATCACCCTTGAGGTCGAGTCCAGTGACACTATCGACAATGTCAAGGCCAAGATCCAGGACAAGGAGGGGTTTGTCTCTTCTCAGCTTTCTTTCGCATTCGCTGACCAATACGTCTAGCATACCGCCTGACCAGCAGCGCCTGATCTTCGCCGGCAAGCAGCTCGAGGACGGCCGCACTCTCTCGGACTATAACATCCAGAAAGAGTCGACTCTGCATCTGGTCCTTCGTCTCCGTGGTGGTGCCAAGAAGCGCAAGAAGAAGACCTACAGCGTGAGTTTCAGCGCGAAT…	2132.07	2232.44	3.19145	1.67421
gene03248	RPL35A	Scaffold5	456764-457188	ATGCCCTCGACAAGGTATGCCGTGCTCGCCGTCGCCGTGCCCGCTGTCCGTCGAGCTGACCGGCCGCGCCGTGCAGACTGTACGCAAAAGGCCGCATTCTCGGCCACAAGCGCGGCAAGCGCAACACGCGGCCCAACACGTCGCTCGTCCAGATCGAGGGCGTGTCCAACAAGGAGGACGCTCAGTTCTACCTTGGCAAGGTGCGCGGGCTCGCCATAATCCTAGGAATATCCCGGGTTTGCTGACCGCCGCGCCACCTGCAGCGCCTGGCGTACGTCTACAAGGCCAAGACGGAGACGCGGGGCACGCGCGTGCGCGTCATCTGGGGGCGCGTCACCCGCTCCCACGGCAACTCGGGCGTCGTCAAGTCCAAGTTCGCCTCGAACCTTCCCCGCACTC…	1031.2	1132.39	3.84504	1.943
gene01423	rpsF	Scaffold2	1871079-1871608	ATGGTCCTGTACCAGCTCATCTGTTTAACGGCACATTACCGCGAATACGTGTGTTCTTTCTTATTCTTACGCGCGTGCACCCAGGCTTACTATCACTGCTTGCAGCAACACATCCGCGAGTTGGTGAAAAGGACGGCGCTGCAGGTGCTCGACAACGGCGGCGTCGTGCGCAACATCCGCTTTATAGGCACACGGACCCTGCCCTACAAGCGCATCATCGACGGCCACTCGCATTATGTCGGAGAGTGCGTCGCGTTCCCTGGCTGGCCATTCTCTGCTCAATGCTCATGACCGCGTCTAGCTACTGGCAAATGCACTTTGACGCGTCGCCACGGCTGATGCACACCGTCGACCGGACGCTGGCCAAGGACCCGCGTGTCCTGCGCACGGGCATGATCA…	148.403	144.107	3.23196	1.69241
gene10785	rpsM	Scaffold27	73728-74297	ATGGTGTTCATCCTGGGCACGCTGCTGCCCGACGCGCACTGTGTACATGTAAGCCTTCAAATGTCTATTTCAATAAAAATGTACACGCAATTTACGCACTTTTTTTATTTATTTATTTATTTATTTCGCCAGTTCGCGCTGCAACGGTTCTACGGCGTCGGGCCCGTCGTCTCCAAACGCATCTGCGCGCGCTTCCAGATCCACTCCAAGCTCAAAGTGAGCCAGCTCTCGCAGCAGCAGGTCGTCGGCCTGCAGTCCTTCCTCGCCGCCCCGCAGACCAGCGCGCCGCTCCCGTCCTTCCCGCGCGCCGCGCCGGACTACCAGCCGCCGCCGCCCGGCACCAGCCTGCCGCCGTACCCAGTCACGCCCGAGACACCCGAGGACACGCTGCGCAATATG…	140.74	100.633	2.26055	1.17668
gene03632	RPL13A	Scaffold5	1738934-1741045	ATGAGCCAGAGCTCCAGCGGGCACGCGACGCCGTGCCCCGCCGACGCCGCGACCATGGGCGGACTGCACGCGATGCGCGATGGGATCGACCTCTGGCTCGCGTCGCTCCCGAAGTACTCGCTCGCGTTCCTCCCGCCGCCGGGCGCGCAGATGCCCGTCGTCCTCGCCGCCTCGGACTTCCCCTCGCTGGGGCACGGCGCCTTCGCCCTTCTTCTCACGGGGCCGTACACACTGCGCGTGGTCAACGGTACTAAGCCATTTCATCTCCTCCCCCCCTAGCCGAGTGATGGCCGTTCGTCTCACATCTCACTTCATTGCTGCAGGCCCGCTCTCAAACGTGGTAACTCAGCTCGACATTGACCCTGAAGGCTACAACCACGGCGCATTCGGCCGCGGCGT…	276.29	236.707	2.41645	1.27289
gene07663	RPS15A	Scaffold13	1141724-1142506	ATGGTCCGCGTCTCCGTCCTCGTGCGCATTTGTTGCTATTTTCCCCAGCGTTTGTCTACTATGCTGACAGGTCGCTGCTGTAGAACGACTGCCTTGTATGTTACTTCCGCATCCTTTCCAATTTATCTCAAGCCGTCTCATCGCGTTTGCCATCCAGAACAACATCGTCAACGCCGAGCGCCGTGGCAAGCGCCAGGTCCTGATCCGCCCGAGCTCGAAGGTCATCGTCAAGTTCCTGTCCGTCATGCAGCGCCATGGTGAGTGTCCCCAGTTACTCTTTAGCCGGGAGTTATAACTACTTGTGGCGGATTGTGTTTCCACCTGCCTCTTGTTTTAAAACATCCCAACATTGAACCTCCTCTGCTCATCCCTTTTTTATTTGGTCGTATTATTACGATT…	208.663	261.297	3.74866	1.90637
gene02691		Scaffold4	849444-852968	ATGTCGAGCACGCCGCAAATCTTCATCGAGGACGATGGAAACGACACGCCACTTGCGATTTACATTGACATGACCGTCGAGGACTTCCCCAGGCTGCGAAATGCAATGAAGGCAAGCCACAGTCTCCCCGTCGCCCAACCGCGTCCCCGCTAACCACCGACGCAGGAACACGGTGCTCGCATCGTCACCAAGATAGCCGACGCGCGTATCCTTCTCGTTAATCCTTCCAACCCCAGCCAGATCAAACGTCTCGCGGAAGAATGGGGCTCCAAGAAAGGCCTCGTCGACAGCGCGTGGGCGTGGGCGGCCGTGCGCGAGGGCTTCGCGCCGCCTATGGACCAGTATATCTGGAACGACAAGATCGACAGCATTGACGCCGAGCACGAGGACGACGTGCAC…	102.283	78.0233	2.1563	1.10856
gene09053	RPS13	Scaffold18	476578-478277	ATGAAGCTGTACGCACTTCTTGTGGCTCGCCTTGGCCGCTGCGACCTTTGCCTTCTTCTCAGCGACGCGCTTGGCGATGAGCGCGTCGAACTCGGCCTTCTGCTCCTTCTGGCGCTCGAAGCGGCGGCGGTTGAGCGCGCGGAGGTGGCGGCGGCGCTGGAGGCGCTCGGGCGTGACGAGGCGCTGGATCTTCGGCGCCTTGGTGTAGGGCTTCGCGTCGGGCTTCTTGGCGCTCTTGACCTCGCGGCGGACGACGAACTGGCGGACGTCGTCCTCCTTGGTCAGGTTGAAGAAGCGGCGGATCTTCGTCGCGCGCTTCGGGCCGAGGCGCTTGGGCAGGACGTCCTCGGTGAGGCCTGGGATGGGCGCGTCGCCCTGCTTGACGACGACGAGGCTGAG…	583.283	495.557	2.4258	1.27846
gene01343	rpsO	Scaffold2	1595778-1596746	ATGAACGCGTTACTCCGCGCGTCCAGCTCGCTGCAGGGTAGCCGCGCTCACTCCTAGCCACAGCAATATTGATTTCTGATTTTTATTGACAGGCACCCTGCGCGTCGCCGCCGCGCCGCGGCCATGCAGCGTCGCTGGCCGGCGGGCGTACAAAATTGCACCACAGGCCAAATTCACGTCGGAAGAGCAGGCGCAGATGGCGCAGCTGTCGCGGACGGAGACGCGCGAGATTAAGCGGTCGAAAGTTAGGGCGCAGATGACCTACTTCGTGCTCGGCCACGCGGCGGACAACGCGAAGCTGTGGGACAACTGCCTGCTCGCAAAAATCATGGTGACGCCCGAGAAGCTGCGCGCCGCCGCCGGCGCGCCGCCCGTATCGTCGCCCAACAGCATCGCGCC…	86.68	94.01	3.15592	1.65806
gene05688	RPL29	Scaffold9	702427-702825	ATGGCCAAGTCTAAGAAGTGCGTCCGCACGGGTCAACGCAACGCAACACTGCTGATACCTTGCGAAGCCACACGAACCACAACCAGAGCAAGAAGGCTCACCGCAACGGTATCAAGAAGCCGGTGAAAAAGACGACTTTCTCCATGAAGGGTGTATGTGCAACTGTCTAGTATGGACTGTTCATTTGATACTCACTCTGCTGTAGGTTGATCCCAAGGTTAGCCCACGCCGCACTTCGACCATGAAGGATTAAATTCTTATTTTGCTTCAGTTCCGTCGGAACCAGCGTTTCGCTCGCACGGGCACGGTGCGCACACTGTGCTCTGACATGGCTCGTTTTGCTCATCCATTGCTCAGATTGCCGCGCGTGCCGCACAAAAAGCTGCTGCTGCGGCATAG	3182.7	2582.41	3.44608	1.78496
gene04468	rpmB	Scaffold7	374822-375347	ATGTTCCCGACCGCCATTCTCAGTCACATAATACCGCAGCCATTCAAGCGCGCGCAGCTGGGCCTCTTCCATGGCGCCATGAAGCAGTACGGCAACAACGTGCCTCACTCGAAGCACAAAACGCGCCGGACCTGGCTGCCCAACATCCAGACCAAACGCTTATACTCGCGAACTCTGGACCAATGGATCAAACTGTCTCTGACGACACGGGCGCTGCGCTGTATAGACAAGGTCGGCGGTCTGGACGAGTACATCCTGAAGACGCGGGCAGACCTGCTGGGCTGGGAGGGCATGCGGCTGCGCGTACAACTGCGCGACTACATACAGGAAAAAGCATCGCTCCAGCGAAAGACGGGCGCGTCTTCACCACGGCCTATGAAGTCGAAGACTTCGGCGCCG…	217.757	171.35	2.46787	1.30327
gene11398		Scaffold31	224820-225257	ATGGACGGACGCATACGACAACAAAAGCAACGACGGCTCCGCTCAGATGGTCGTCTCGTACGGCAGCGGGACCATGGTCTGGGGGACGTTGTCGGCGGTGGAGACGACGTAGGCCTCGCGCGGGAGGCCGGGGTGGCGCTTGAGCGTGGGGACGCGCTCGCCGGACGCCTTGGCGGCGGCCTTGAGCTGGTCGTTGCGCTTGACGCGGTCGAGGAACTCCTGGCGGCACTTGGAGTGCTTGACGTGCTCGATCCGCACGTTCACGCGCTTCTCGAGGTACCGGTTCCCGACGATCTTGTGCACGATCACGCCCACTGCGCGCGGGGTCACGTTGTACACGATGCCTGTGCGCCTGCGCGACCGAGCGTCAGCGAGGGCGCGTGCGGGCAAGGGAGCGGG…	549.64	471.923	2.63253	1.39645
gene11397	RPS9	Scaffold31	222927-224694	ATGTCGCCGACATTGTACGAGATCAAGTACGTCGAAAGTTTGATCGGCCCGTTCTCTACGCCGTCGTCAACACCTACACCCACAGCGCAGCGCGGAAGACAGACCCTTGAAGCCGCGCTTGAACATGTCGCGCGTGCGCGCGCGGTAACCGAATGAGTGCGGCATCTCGAAGCGGGGCGGGGCGGGGGTCTTGAGGAGGCGGGCGCGGCGGCCTGGTGGGTGGGAAGGGCTGAGCGGGAGGGGAAGCGGGAAAATGCGGGCGGGGCGGCGGGGGCAAACCTAGCTTGTGTGGACGCTGCGGCGACTGCACAGTCCCCGGCCGGCATCGCCCGAACCGTCCGTTTCGTCCTCTTTCCTTCCCCTCCCCTCAAGACCCTCCCACGGCGGCCGGCCTCACGA…	471.623	429.353	2.65948	1.41114
gene02638	RPS27	Scaffold4	701827-702416	ATGGACAGTCAAGCAGAGACCTGTCCGCGGGAGGGCTGGGAGGGTCCCCGTCGGCTCCGGCGGAACATGCTAATTGCAGTCCTGACTCCGCTTTGAACTTTATCAAAGCTCCGGGCCAGGCTATCATCAAAGCCTTCAAAAGCACACCGACCTGCACGTTCGCAGCACCCGCACTCGAAAATGGTGCGGACGACGGCCTGGCAGGCGCCGCGTGGGCTGACGCTGCCGTAGACTCTCGCCGTTGACCTCCTCAACCCGTCCGCCGCGCACGAGAAGAAGTCGCACAAGCTCAAGCGGCTCGTGCAGTCGCCCAACTCGTTCTTCATGGACGTCAAGTGCTCTGGTGCGTGCTCACGGCCGCTCTCAGCTGGCTCCCAGGTGCTGACGGCGCCGCCAGGC…	22.9633	22.71	3.02515	1.59701
gene04583		Scaffold7	721742-724480	ATGGCCCCGCCCATTACGCCGGCAGACTCGACTTCGACCGTCGATGAGTCTATTAACGTACGCGCGCCCGGTTGCCCCTCCCCCTTCCCATGCTTAAATTATGCAGCAACCAATGCCGTTCGCGGGTGATATGCTCAGCGGTCTCATCCTTGAAGACGCTGTGCTTCACAACGCGACGAAGAAGGTGCGGCTGCGATTCGAAACCCTGGTCCAAAGACAAAGACTAAGCGCGCGTCGCAGAGCTCGAATCCTATCGACAAAACTTTCTTTCTCGGCGTCCTTGCGGGCTTCTGGGTCGTGCGTCGAGCGCATTTCCTGCGCTAGCATTCACGTCACTCACGTTGCATGCGCTGTCAGTCGCTGAGTGGCACCGCCGCTTTGTCTGCAGCCGGCGGCGTA…	136.603	105.94	2.19503	1.13424
gene03522	rplW	Scaffold5	1346085-1347032	ATGGCATTCGCGCCGTCTGCGCGGCGACTGGCATTCTGTCCCACTGCACGACGGCTCGCCCTGTCGCCTACTGCGCCGCGACATATGCCGCGCAAGGTGCACCCCAAGCTGACGGACGCCGCGGAAATCGCAAAGGCCGTGGCGAAGACGGCGTCGACGCCGCACAAATTGCGGCTGAAATCCGAGGCGGAGACGAAGCGCAAGCTGCAGCCTGGCGAGGCGGACCTGCTGCCCGACGGGCTGATGCGCGGCGAGGCGCGCAAGCTGCTGCGCGCGCGGCTGCACCGCGACGACTACGCGGCGGGCCAGGACGACCACGCGCTGCTGGCGAGCCTGCGCGAGCGCGAGTACCGGATCCGCGGCGTGCGCGACGGCAAGGTGGTGGGCCACCGCGTCTTC…	100.337	102.47	3.08174	1.62374
gene04448		Scaffold7	308114-311585	ATGTCCGAGGAAAAGGCTGGGAGCGACGGCCAAAGTCCGACCAGCTTCCCGTTCCCAAACTTCAGCATGCTCGCACTCCGCGCATCCCTCCGCACAGTAGCGCGCCCCCTCGCCGCGCGCGCCCTGCAGCGTCCCTTGGCTGCCACTACTGTCACGCGCCTGCGGGTTGCGTCATATTCGGCGGCCGCAGGGCTTTCTGAGAGCCAGGTCGAGTCGCGTATCTTGGACGTGTTGAAGAGCTTTGAGAAGGTCGACCCGGCAAAGGTAATGGCACGCCCGCCGCCCTTCACTGTCCCACATTAATGGGCCCAGCTCTCGAAAACGGCTTCTTTTGCGAGCGACCTCGGCCTCGACAGCCTGGACGCGGTCGAAGTCGTGATGGCCATAGAAGAGGTCCGC…	173.177	116.76	2.01743	1.01252
gene01341	RPS23	Scaffold2	1585115-1585804	ATGGGTTGTACGTCTGCGCGCGCGGCACACACAATTGCTGCTCGGTGACTGACTCGCGCGCAGCAAACAAGCCCCGCGGTCTGCAGGCCGCCAGAAAATTGCGGACGACGCGGCGCGAGAACCGCTGGGTGCGTTACGGTTTTGTTGTGAGGGAGGAGGTGGCTGACTCGTATTGCAGGCCGACAAGGCGTACAAGAAGCGCGCGCTCGGCAACGTGTACAAGACGTCGCCCACCGGTGGGTCGTCGCACGCCAAGGGCATCGTCCTCGAGAAAGTCGGCGTCGAGGCGAAGCAGCCCAACTCGGCCATCCGGAAGTGCGTGCGCGTGCAGCTCATCAAGAACGGCAAGAAGGTCACGGCCTTCGTCCCCGTGCGTCCTGCTGTCCATCCTGGATAATC…	1487.15	1059.06	2.15045	1.10464
gene11961	rpsG	Scaffold36	55384-56035	ATGGCGTCGACGTCGGCGCTCGCGTTCCGGCGAATACCAGGCCTTTTGCCTCTCTTCCGCGCGCGTGTCGGCGCGGCCGTGGTGCAACGGCGGACGGCGGTGACGACTGCGGCGCAAAAGACGGGCACGGCGGCGACGCAGCTGCTCAAGGCGGACATCCCGCCCCTGGAGGACCCGCTGCTGCACTACATGGCGTCGATGATCATGCGGCACGGGATGCGGCACCGCGCGTCCAAGACGATCTCGCTCATGCTGCAGCACATCCACGCGATGACCGGCTCGCAGCCCATGGACGTCCTGCGCCAGGCCGTGCTGCGCGCCGCGCCGTCCGTCAAGGTCGTCGGGCTCAAGATGGGCATGAAGACGCTCTTCAACCCCGTCCCGCTCTCCGAGCGCCAG…	290.447	305.123	3.31416	1.72864
gene04610	rplA	Scaffold7	800556-801783	ATGAGCTTTTCTGCTCGACTGGTGCTCACGCACCACACCCTCTCCCTCGCACGCTCGTTGTGCACAGCTGCGCCATGCAGGCATTCGCTGTCTCTTCTGGCGCGCCCCGGTCCTAGTCTGGCGCGTGCCAGCTTGCCGTTAGCAGCGCAGCACCGGACATTCTTCACGTCGCCCGTGGCCTGCGCGCGCGCCAAGGACAAGAAGGCAGCGAAGAAAGCCAAAAAGGCGGCGATGAACCAGCCCAAGAAAAAGAAGAAGGTCGTTGTCAGGAAGAAACGCGCCAGCAAGAAAGAGTCGCAGCTCAGCGCGAGCGAGAAACTGCCGCTCGAGGAGGCTCTGGCCGTGCTCCGCGTGCGCACTTTCATTTTCATTACCGACTCTCACTCATTTTTGCCTTGT…	145.91	175.017	3.5866	1.84262
gene04613	RPL7A	Scaffold7	807234-808387	ATGAGTGCACTGTGGTGCCCGTCCGCGAGCTCTGGCGACCGTGAACCCCCTGTATATGCATTCGTGCGTCCTTTGGCTAGTTAATCCAGGCCGAGGCTGATTTTCGGTTAAAGACTGCTATACGCTTATCGCAGAGTTGCTATGCACTCTTGCATTTGGGGGGCCGCACGCAATGTGCGGCGCTAGAGCTCCTGGATGGGCGCTGCAGTGCACTGCGCTGCGCGACCGCCAGTCTCAATGACCCCCGTTCCAGCCGCCAAAGAAGGGAACTGGCAAGAAGCCCGCGCCTGCGCCCGGTGGCGCCTCCAAGGCCAGCAAGGTCCAGAAGAACCCGCTCTTCGAGTCCCGCCCGAAGAACTTTGGCATTGGTTTGTTGTCGCCTTGGAAAGTTCAGAGACT…	1092.19	747.52	2.01695	1.01218
gene13817		Scaffold68	68239-70919	ATGCCGAATTTTCTTGCATGCTTTCTGCTTTCCGACGAGCGTACGCGACGACCACGACCGTGGGTCGCGCGTCCCCCGCGGAGGCCCTGCGGCCGGTCTGGGCGGCGTAAGGCGCCCGTCTGGTGGCCGTAACGAGCGCGACCAAAATCGACAACAAGGGCCGCCAGGGCCTGGCGGGCGACGGCAAGGCCGTCTCGCCAAAGATTCTTTGGAAGACGCTCAGCGCGGAAATATGTTCAAGTACCCGCGACAAGCTGCAGCTTCGCCAGCATTTTATACGGGAAATGCGGCCTCAACGATACGGTCGCGACTCTGGAGCGCGCCATCTCGCATGCGCGGCGAATTTTGACTGCGCGCAGCTGCTACCTGTGCCCGACTTTGCGCGCGCGACGTTCCCGC…	7.77667	8.71667	3.16106	1.66041
gene00080	RPL44	Scaffold1	271253-272312	ATGGTCAACATCCCCAAGACACGGCGCACCTACTGCAAGGGCAAGACGTGCAAGAAGCACACGCCCCATAAGGTGACGCAGTACAAGAAGGGCAAGGATTCGATTTTCGCGCAGGGCAAGCGCCGTTACGACCGCAAACAGTCCGGTTACGGTGGTCAGACGAAGCCTGTGTTCCACAAGAAGGCGAAGACGACGAAGAAGGTCGTCCTGCGCTTGGAATGCACCGTCTGCAAGTACAAGATGCAGCTCGCACTCAAGCGTTGCAAGCATTTCGAGCTGGGCGGCGAGAAGAAGACGAAGGGTGCTGCGCTGCAGTTCCCCGCGCCCCGCTATCGCATGTTCAGCGTTGTGCTGCGCGCTGCTTCCATTGTCCGGACAGAGCGTGGATGCGACTTCTGA	1302.99	1110.74	2.68133	1.42295
gene09612	RPLP2	Scaffold20	629150-629552	ATGCGTCATCTTGCTGCATACCTCCTCCTCCAGATCGGCGGCACCGCGTCCCCGTCGGCGGCCGACATCAAGAAGGTCCTCGGCGCCGTAGGCATCGAGGCCGACGAGGACCGCCTCGAGAAGCTCATCTCCGAGCTCGACGGCAAGGACATCAACGCCCTCATCGCCGAGGGCTCGTCCAAGCTGGCCTCCGTCCCGTCCGGTGGCGGCGGCGCCGCTGCGTCGTCGGGTGCTGCCGCTGCTGCTGGCGGTGCTGCGCCGGCCGAGGAGAAGAAGGAAGAGAAGAAGGAGGAGGAGAAGGTCCGTCTGCTCGTTATGCTGCTTTGGATATTGGACTCTATTGACCGATTTTTTATTGCAGGAGGAGTCCGACGACGACATGGGCTTTGGTCTCTTCGA…	1855.25	1339.44	2.35206	1.23392
gene11199	RPS5	Scaffold29	459745-460467	ATGGCCGCGCTGACGCTCCCCGCCGATGTTCCCCGCCCGCCTGCCGACGCGCCTGAGGGCTCTGCGAAGCTCTTTGGCAAGTGGGAGTCTGCCGAGTGCGTGTGCCAGTAGTGTGCTATCCGTTGTGCTGACGGGCACCCAGCGTCGAGGTCAAGGACATTTCGCTGGCCGACTACATCCAGGTCCGGCACGCGGTCTACCTGCCGCACACTGCGGGGCGCTATGCCAAGAAGCAGTTCAAGAAGGCGCAAATGCCCATTGTCGAGCGCCTGGTCGACTCCCTCATGATGAAGGGCCGCAACAACGGCAAGAAGCTGCTTGCCGTCCGCATCGTCGCCCACGCGTTTGAGATTATCCACTTGCTCACGGACCAGAACCCGGTCCAGGCGAGTTGGCTGC…	481.53	471.637	2.92654	1.54919
gene13676	RPL27A	Scaffold63	32794-33338	ATGCCGACGCACCTGTCCAAGACCCGCAAGCACCGCGGACACGTCTCTGCCGGCCACGGTCGTGTTGGCAAGCACCGCAAGCACCCGGTGGTCGTGGTCTTGCTGGTGGTCAGCACCACCACCGGTGAGCTCTGGGCTCTGGTCATTGCCGCGGGCAGCGCTGACGGCCGCCGCAGCACCAACATGGACAAGTACCATCCTGGTTACTTCGGCAAGGTCGGTATGCGCCACTTCCACTTGACGCGCAACCAGTACTGGCGCCCGGTCATCAACGTCGACAAGCTCTGGACGCTCGTGCCCGCCGCCGAGAAGGAGGGCCTGAACGAGTCCTCGGAGGTCGTACCCGTCATCGACACCCTCCAGCACGGCTACGGCAAGGTCCTGGGCAAGGGCCGCCTG…	250.723	223.097	2.68384	1.4243
gene04783	rplE	Scaffold7	1420237-1421932	ATGGACGTGCCCATCTGGACGAGCGTCGCAGTGGCGTGGAGCTCGTCGCCTTCGACGCCTGCTGGGCGGACGAAGCTCGTACCGATGTCGGCGGAGACGCCCGTCATGAAGTGCCCGCGGGTGGACACCGCCAGCGAGCCCAGTGTGTCGGTCAACGAGAGGATGAGCCCGCCGTGGAGTGTCTGTCATGTTGAATGCGGGTAAGGGTCGCGCAGGGGCTACTTGTTGGATGGACGTAAACATACATTCGTTCTGTTAACTTCGGGAGATTGATTGAGACCATGTCTGAACAGTTGTGAAGTGTTACGAACGATTGTAGCTTGCGATCTTGAACGACGCATCGAGTCTGCCGGGCACGGCGCGTTCAATCTTCAACTAAATGACCAGTAATTTAAATTT…	49.3733	96.9567	5.76852	2.5282
gene05927	rpsK	Scaffold9	1365910-1366764	ATGTTCCGCGTCGGGTGTCGCGCTCTGCGCGTCCATGGCCATGCCGCATTCTCGACATCCAGACGCGTCCTGAACTCCCCGAAGCCGTCCGCCGTGTCCGACGTAGTCAGCAACATACTCACCGACCTGGGCGCGCCGCCCGAGGCAAAACGCGCCCCCGCTGTGCAGCCTCTGCGGCCGCTGGGCGGCAAGGAGCTCGACATCGAGGCTGCAGAGGTGGCTGCGTCGGCTGCCCCATTCGGTTCTGCGGAGGTGCCATTAGCGGACACCCAGCCGCCGACAGGACCGGACCTCGACTCGCTGCCGCTCGGCGTGCAGACGAATCAGTCGTTCGCCAGGGCACCGAGGCTCAACGTGCTGCCGTACACGCTGCACATTCACGCAAGCCCCAACAACACG…	108.103	126.243	3.56992	1.83589
gene08184	RPL23	Scaffold15	488474-489118	ATGGCCCCAGCAAAGCGCGGTGCGTCGCTGCAGCCGCCAGCGCCCTCGGCGCTGGGGCCCGTCATATCGCTCTCGCTGTGGAGGCTGACCTAATCGTGCTCGTCGTCGCTGCAGGCGGTGGTGCGCAGGGCAACAAGTACCGGATGACGCTCGGTCTCCCGACGGGCGCGGTGCTGAACTGCGCGGACAACAGCGGAGCGAAGAACCTGTACATCATCGAGACGTTCGGGTTCGGCGCGCGGCTGAACCGGCTGCCCGACGCCGGCGTGGGCGACATGGTCGTCGCGTCCGTCAAGAAGGGCAAGCCTGAGCTGCGCAAGAAGAGTGCGTCCGAGCCCTGCGTCCTGACTAGAGTGCAGACTGACTGACTGCGCCTTCAGCGATGCCGGCGGTGGTGGT…	777.42	678.88	2.61462	1.3866
gene04259	RPL24	Scaffold6	1756341-1757157	ATGCGTGTGGACAAGTGCTACTTCTGCTCCAAGCCCTGCTACCCGGGCCATGGTAAGCATAGCTCCCTCTAAGCTGCTTTCAACAAGTTCATTAGCATGCAGGTAGCGCGTTTGTTCGCAACGATGCCAAAATGTTCAGATTTTGCTCGTCAAAGTGTGTGCAGCCACATGAACACGGGTTCACTTACTGACGCCCTTCAGATGTCACAAGAACTTTAAGTAAGCCGTTCTTGCCTTTATTACCGCCCATAGTACTTACTGGGATGGCAGAATGAAGCGCAATCCGCGCAAGGTCAAATGGACGAAGGCGTTCCGCAAGGCTGCAGGCAAGGAAATGACCATCGTGCGTGTCGCGTGCAGTCGTCGCCCCCTGGAATGCCTAACTGAAGCCGACACTCA…	161.087	179.953	3.34277	1.74104
gene04278	rpmA	Scaffold6	1823348-1823982	ATGCAGGCCCTGCGCTTCGCCGCCCAGCGCCTCAAGCCCGCGCTCAGCCGTGCGTTGTGCCTTCTTGTCTGGGGGCTCTATTTATCTCAATTTTCCTTGCGGTTGTCTGTTGTAGTCTGGGGCCAAGTCCGCACGGCCACAAAGCGCGTTAGCGGCTCCGGAGGCCGCAGCGGAGGCACCGCAGGCAAGCGACTTGGTGTTAAAAAATTCTCAGGTATGACTCTGCGCGACCAGCGACGAAATCCGAATCTTAATTACTGCAAATTGTGAACGTTCAGATGAACCTGTCATCCCGGGCAACATCATCATCCGCCAACGCGGCACGCATTTCCACCCGGGCCAGCACGTCCGTCTCAGTCTTATGCCTCATCCCAAACCATAATGTGCTCAATGAGACCC…	110.487	75.4633	2.1646	1.1141
gene02554	RPS11	Scaffold4	469110-469795	ATGGCCGAACAAGTGCGCAGAGTCGCCGTCGGACGTTGCGCGTCGCGCTGACAGGCTGGGCGCACAGATCGAGAAGGCGTACCAGAAGCAGCACCTCTTCCAAAATGCGAAGGCCCGCGTTGGCAAGAAGGTGACCAAGTCCAAGCGGTGGTACAAGGACGTCGGCCTTGGCTTCAAGACGCCCGGCGAGGCCATCACTGGCACTTACATTGGTGTGCCCCATACGCGCCGTGTGCAATGGCGGATGGAGCTGAGCATCGAGCGCCACAGACAAGAAGTGCCCGTTCACCGGCAACGTCTCTATTCGCGGCCGCATCCTGACTGGCAAGGTCGTGTCGACGAAGATGACCCGCACCATCATCATCCGGAGAGACTACCTCCACTACATCCCGAAATACA…	1447.43	970.677	2.03085	1.02209
gene05549	RPL36	Scaffold9	279613-280112	ATGGCCACCACGAAAACCAGTGCGTCCACCGCCGCCGCCACAGTGCAGGATTGTGCGCGTATGCTGACCGACGGCCGTTGTCGCTGCAGACCTCCGCGTCGGCCTGAACAAGGGCCACCCGACGACGCGCCTCGAGAAGCGCACGCGTCCGTCCCACCGCAAGGGCCAGTCGTCGACCAAGACCAAGTTTGTGCGCTCCGTTGTGCGCGAGGTTGCTGGCTTTGCGCCGTACGAGCGCCGCGTCATGGAATTGTTGCGCAACTCGAAGGTCGGGCTGCCGGTCTTAGAAAAAAAAAATAGGCTATGGACGTTGACACTGTATGTTTCAGGACAAGAAGGCGCGCAAGCTGACGAAGAAGCGGGTGAGTCGGTGGACCGACAGACATTTGGATTCGGGCT…	641.43	424.273	2.18558	1.12802
gene06744	RPL23A	Scaffold11	1034870-1035514	ATGGCAGCAACAAAAGCAACGAAGGCGCCGAAGACCGGTGCGTGTCCTGCTCCTCGCTGCTCGCTGCTCGCTGCTCGTAGTGCTGACGACGACTGCAGAGAAGAAGGCGGGGGCCAAGGCCGTGAAGGGCAAGGAGGCCAAGGCGAACGCGGCGAAGAAGGCGGCGCTGAAGGGCACGCGGTCGCACGCGCTGCGCAAAGTGCGCACGAGCGTCAGCTTCCACCGGCCCAAGACGCTGCGCCTGGCGCGCGAGCCCAAGTACCCGCGCAAGTCGTGCGTCCGCCCCCCGTCCGGCGCAGCCTCTATCCGTCGTGCTCATTCGCAACTGCTGGCAGGATCCCGCACGCGCCGCGCATGGACCAGTTCCGGACGATCGTCTCGCCGCTGAACACGGAGAGC…	1075.15	973.457	2.72361	1.44552
gene10775	RPL26	Scaffold27	38628-41335	ATGAAGTACAACGCTGGTGCGCCGCCGCCGCTGCCGTCTAGCCCAGGCCGCGCGTTGGCTAACTCGCTGGCGCAGACGTCAGCTCGTCGCGGAGGAAGTCGCGCAAGGCGCACTTTGGCGCGCCGTCGTCCGTGCGCCGCAAGATCATGTCCTCGGCGCTCAGCAAGGAGTTGCGCCAAAAGTACAACGTGAGTCTTGCTGCTGTTACTTTTGCTTTCGACGCCGCGCACGCGTTTTGTTACTTTCAGCACTTACTTTTTTGTATTGCTGTTACTGTTACTGACGCGCCACGCTTTGCCTTTCTTCGCAGACCCGCGCCGTGCCCATCCGCAAAGACGACGAGGTCCGGATTGTGCGCGGCAAGCTCAAGGGCCGCGAGGGCAAGGTCACGCAGGTGTA…	271.627	199.637	2.0857	1.06053
gene07639	RPL10A	Scaffold13	1079534-1080475	ATGAGGTGCGCGCGTCGTCCCCCGCGGTTACGCGCGTCGTACTGACCTTGGGAATAGTTCCAAGCTCTCAGTGTCAAGCGTGCGAGGCTCTGTCCGCGAATTGCTCGCCGATGCGAACGGCGAGAAAAAGCGCAAGTTCGTCGAGACGATCGAACTCCAGATTGGCCTCAAGAACTACGACCCGCAGCGTGACAAGCGTTTCTCGGGAACTGTCAAGTGCGTGCTGGTGCTCGTGTTGTGCCCAGGAATGATTTTGCTCACGAGCGCGTGCGTTCTGCAGGCTCCCGAACGTCCCGCGCCCGCGCATGAGCATCTGCATTCTGGCCGACGCGCACGACATCGACCGTGCTAAGCAGATCGACCTTGAGTACATGTCCGTTGACGACTTGAAGAAGTATG…	742.98	574.517	2.24681	1.16788
gene01518	RPL12	Scaffold2	2182469-2183138	ATGCCGCCCAAGATCGTGCGTGCCTGCGCCCGGCGCCCATTCCCCCGTACTCACACGCCCTGCGCAGGACCCCAACGAAATCCGCATCCTCCACTTGCGTGTCACGGGCGGTGAGGTCGGTGCTTCGTCCGCGCTTGCGCCCAAAATCGGTCCTCTGGGTCTGGTCAGTGCTCGTGTCCTGCAGTGTGTATCTTGCTACGCTGACACTGTGTACGCGTGTGCGCAGTCGCCCAAGAAAGTCGGTGAAGACATCGCAAAGGCGACCGGCGCATGGAAGGGCCTCCGCGTCACCGTCCAGCTGACGATCCAGAACCGTCAAGCAGCCGTCTCCGTCGTCCCGTCCGCCAGCTCGCTCGTCATCCGCGCACTGAAGGGTTCGTACATATATATAATACATAT…	1471.14	1566.47	3.22204	1.68797
gene05589	rplL	Scaffold9	419887-420652	ATGTTCGAGCCGTTAGCTGTGAGCACACCTGGCTGCCCAAGAACCGCGCACGGCCTGACTCGACGTGTTGCAGGCCTCCTGTTCGTCGGCGCGTCGGTCGCTGTTGGCCTCAGTCGCTCGGCCAGTCCTTGCGGCTCGGCCAGCGTGCGCCTCGCGAAGTCGGCTCCTGCACGCAACAGCAGCTGCGAGAACCACAACAGACCCGCAAATATCGCGCATTGTGGACGATATCTCGGGCCTCACTCTGCTGCAAGCGGCAGACCTGGTCGCAGCCTTGAAAGTGCGTCGGTGATACAAATTCTCGGCGGCGTCTGACGCGACGCGCCTTGTAGACACGGCTCAACATCCAGGAAATTGCCATGCCCACAGCGGCAGCGGCGCCAGTTGCTGCAGCAGTCG…	104.93	132.453	3.88093	1.9564
gene07674	RPS30	Scaffold13	1193893-1194169	ATGGGCAAAGGTCGGTGTCTGTACCACGGAGAGCACAGCCGTGCTCAGCAGTTCTTTACGTAGTTCACGGCTCTCTCGCGCGCGCAGGCAAAGTCAAGTCGCAGACGCCCAAGGTCGAGCCGCAGGAAAAGAAGAAGACACCCAAGGGCCGTGCAAAGAAGCGTCTCCTCTACAACCGCCGGTAAGCAGCCTCTGCTACAGTCCACCGTTCGTCGCCTCATACCCGTGCAGCTTTATCAATGTTACGCTGCTGCCCAACGGCAAGAGGAAGATGTGA	1111.11	829.363	3.51231	1.81242
gene12990	RPS21	Scaffold47	28112-28936	ATGGAGAACGACCAAGGAGTTTTGGTGGACCTCTACGTCCCCCGCAAGTGCGCGGCAACCAACCGCCTCATAACCGCTAAAGACCACGCGTCAGTGCAGATAAGCATTGTCGACGTTGACGCCGAGGGCCGCGCATTGCCCACCTCGACCTCCTTCGCGCTCTGCGGCCAGGTCCGCGCCATGGGCGAGAGCGACGACTCGCTGAACCGCCTTGCGACGAAGGCCGGGCTGCTGCGAAATACCCTGTTTGCCGATGAGATATTGCGAAACGTGCGACGCTCTGGCCTCGTTGAGTTAATCTTGAACCCCTGGTCGCCGTTCCCTGCCAATACCACTGCCTCGCGCACCATCCATGACGGACGACTCGCTCTTCCCGCCGCGCTGCTGCCGGCACGAGTT…	63.3367	50.36	2.25525	1.17329
gene02979	rpmG	Scaffold4	1820244-1820600	ATGTCGCGCCGGACGTTGCCGAACTCTTTTTCTCCTGGAAGTTCCGCCGCGCACCGCTTCACGCGCGCGACTTCCGTTCAGATGGCGCGCCCAAAGGCAAAGTACGGTTCAAAGCTACTCCCACGGCTATATCTGAGCGTCTTGCGCGATCTAGAACGCTTGTAGTCCGTCTGCTCTCCTCAGCGCAGACGGGCTTCATGTACACCATCAAGCGCAAGCGTATGATCGGATACTACAAGTTCGTCAAGTATGACCCTATAGGTGCGTGATACACCGCCTGTCATTCGAAGTTCTGACTGAATTGTAGCTCGCGCGCGTGTCTTGTTCGTCGAACAACGGAAAACGCGCGGGAAGTAA	185.193	322.36	6.42146	2.6829
gene05080	RPL18A	Scaffold8	583053-583686	ATGGCCATCAACGAGTACCAGGTTATTGGGCGCCATCTGCCCACGGAGCGTGAGCCGACGCCCAAGCTCTACCGCATGCGCATCTTTGCGGCCAACGAGGTCATCGCAAAGTCGCGTTTCTGGTACTTCCTCCGGAAGTTGAAGAAGGTCAAGAAGACGACGGGCGAGATCGTGTCGGTCAACGCGATCTCTGAGAAGAAGCCGCTCAAGATCAAGAACTTCGGCATCTGGCTGCGCTACGACTCGCGTTCGGGCACGCACAACATGTACAAGGAGTTCCGCGAGCTGAGCCGCACGGCCGCCGTCAAGGCGCTGTACCAGGACATGGCCGCCCGCCACCGCGCCCGCTTCCGGTCCATCCACATCCTGCGCGTCGTCGAGATCGAGAAGAGCGCGGAC…	848.143	619.127	2.18675	1.12879
gene04532	RPL34	Scaffold7	556267-556719	ATGGCCCAACGCGTGACGCTCCGCAAGCGCAACCCGTACAACACGACCTCGAACCGTCGTCGGATCGTGAAGACGCCGGGCGGTAAGCTCGTCTACCACCACATCAAAAAGCCCGCGTCGGCCCCCAAGTGCGGTGACTGCGGCGTGGCCCTGCCTGGCGTGCGTCCTCCATCCCGCTCACGCTGCTGCTACTCGCATATTGACTGCTTGTGCCCAGATCCCTGCTCTGCGCCCGCGGCAATACGCCACCATCTCGAAGCGCCAGAAGACGGTCCAGCGCGCATACGGTGGTTCGCGGTGCGGGGACTGCGTCAAGTCGCGGTGCGTGCATTACTTCATTCCCTCTGTTCAGCGCGTACTGACAATGGATACAGCATCGTGCGCGCGTTCCTTGTGGAG…	1337.26	1102.08	2.7307	1.44927
gene07662	RPS17	Scaffold13	1140843-1141652	ATGAACGCGAGTCAGACAAGCACGGTACGGACACGGTGGGCGGCGGACGCGTTAGGTGCGACGGCGAAGAGGGTCGTGAGGCAAAGCTTGAGCGGCGAACGCCGGCTGCGAGTCTGGCACTGAGAATCAACGAAAGCAAGGTTTCGGCAAGTCCCAGCCAGTCCTCGTCTCGTTCTCCTCCGCTCCCCGCCAGCCACCGAAAACAAAATGGTGCGCAGGGCATATATCTGGCCTGCGCGGCGCTCTGACCATGCGCGATAGGGCCGTGTCCGCACCAAGACCACCAAGCGCGCCTCGCGTGTGCTCATTGAGAAGTACTACCCCCGCCTCACGCTCGACTTCCATACGAACAAGCGTATCATCGATGAAGTCGTGCGTTCGAATCCACCACTGTCCGCA…	1687.67	1118.14	2.0274	1.01963
gene03417	RPL37A	Scaffold5	1006089-1006682	ATGGATCGGGAGGAGGAACTATTATTTCCGGCGTTTACCGCAAACCTTGTCCCTTCCATCAACAAACCCTCCTCAAGAAAATGGTACGCCGCCGCCGCCGCGCCGGCCGTTCCCAGCGCCCATTAACGATGTCCTCTCGTAGACGAAGCGCACGCGCAAGGTTGGCGTCACCGGCAAGTACGGCACAGTAAGCCCCAATTGCTCGCAGCGGCCGGCGCGCGCGATGCTGATGCGCGATCCTTAGCGTTACGGTGCCTCCCTGCGCAAGCAGGTGAAGAAAATGGAGGTCACGCAACACGCGCGCTACACCTGCACGTTCTGCGGCAAGGTTTGTGCTCTGGCCCACCTTCGTTTCAATCGCGGTGCTCATATTTCGCGTGTGTGTGTACCAGGACTCCG…	913.5	810.437	2.78387	1.47709
gene05819		Scaffold9	1076845-1079360	ATGGCTACTGTCCAGAACAAAATCCAGCGCACTGCCAACGCGCCCGTCGCGCCCGCGGACGAGATTGAGACGAACGTCGCGCAGGCGTTGATCGACCTCGAGAACAACGTACCCGAGCTGAAGGACGACCTCCGGCCGCTCGCGATCTCTGCTGCCCGCGAGGTCGACGTCAAGGGTGGCAAGAAGGCCATTGTGGTGTTCGTGCCGGTGCCGCAGCTCAAGGCGTTCCGCAAGGTCCAGCAGCGGTGCACTGACCGCGAACTCGAGAAGAAGTTCTCGGACCGCCATGTTGTGTTCATCGCGCAGCGCCGGATGCTCCCCCAGCCGACGCGTCGCTCGCGTGTCAAGCAAAAGCGCCCGCGCTCGCGCACGCTGACGGACGTGCACGCCAAGATCCTC…	140.283	101.677	2.06034	1.04289
Table S8.2 Glycolysis / Gluconeogenesis
Gene ID	Gene name	Chrom	Location	Gene	NT	EHT	FC	log2FC
gene06429	tpiA	Scaffold10	1506495-1507509	ATGGCTCGCAAATTCTTCGTCGGTGGCAACTGGAAGCTCAACCCGGGCTCGCTCGCGGCGGCCAAGAGCCTGGCAACCAGCCTGAACCAGGCTGAGCTCGACCCGAACGTTGGTAGGTATCGGCACGCCTGATGAGCTGTGGATCGCACGACTCACGGCCTCCAGAGGTCGTCGTTTCGCCGCCCACGGTGTACCTGATCCCGATCCACGAGATTCTGAACAAGAATATCGGTATCGCTGCCCAGAACTGCCATACTGCCGCGACTGGCGCCTTCACGGGCGAGATCAGGTGCGATGGCTGGCCCGGCGTCAGTTGACAGTATTGTCTAATTATCTTGGAAGCGCCGCCCAGCTCGTCGACGCGAATATCGGCTATGTAATCCTCGGCCATTCTGAGCG…	1193.53	37.22	0.0862866	-3.53472
gene05738		Scaffold9	849502-852833	ATGCCAGTGGCCAGCTACTCGTTGACGGTCTTCTCCCCCAGCGGAAAGCTCGTCCAGATTGAACATGCCCTGGCTGCCGTGTCGTCGGGGACAACAAGCTTGGGAATCAAAGCGACGAATGGCATCGTAATTGCTACGGAAAAGAAGTCGTCGTCGCTTCTCATCGACTCGTCCGCGCTCGACAAGGTCGCAGTCATCTGCCCCAACATCGGCATTGTCTACTCGGGGATGGGCCCAGACTTCCGCGTTCTCGTGACACGCGCGCGGAAGAGTGCGCAGGCGTACTGGAAGGCGCGTCGCCAGGGACCACGCGTTCGCCACCTTGCCCTTACGCTGTCCCAGATCTATGGGGAATATCCTCCGACAAGAGTCCTCACACAGGAGCTCGCAACAATTGTT…	278.507	37.4833	0.376814	-1.40807
gene11013	eno	Scaffold28	340059-342883	ATGTCTGTCACCAAGGTCCACGCTCGCCAGGTCTGTCGGTGCCGGGCGCGATACTGCCGATGCTGAGGGCCCCCCAGATCTTCGACTCGCGCGGCAACCCGACCGTCGAGGTCGACCTCTGGACGTCCAAGGGTGCGCCCGATGCCCCGATCGATCCACGATCCTGACCCCCGCCCAGGACGCTTCCGCGCGGCCGTGCCGTCGGGCGCGTCGACCGGCGTGCACGAGGCCGTCGAGCTGCGCGACGGCGACAAGGCGAACTACGTCGGCAAGGGCGTCAGCAAGGCCGTCGAGAACGTCAACAAGGTCCTCGGCCCAGAGCTCGTCAAGTCCGGCCTCGCTGTCACCAAGCAGAAGGAAATCGACGACTTCCTCATCAAGCTCGACGGCACCCCCAAC…	2395.45	126.593	0.147627	-2.75997
gene12115		Scaffold37	167092-170854	ATGATGCAACAGAATGGAGATGCCATTAGGAAGGCACTGTCATTGGACCTCGGGCGTAACGCTGTCGACATCGCGATGGGTGACACGCTTCCCGTCATCGGTTCTGCAATCCGTGCTGCGAACGCGCTTGAACAATGGACGACGCCTGCGAAGCCCAAGCCGCAACTGGAGTGGCAAGAGGGATGGGGTCCGACGATCTATCCTGTGCCCAAAGGCGCTGTCCTGATAATCAGGCACGTGTACTCAGAACCATTCCGCGGCTGGCAGTGACTAATAGCACTGACGCGATCCTTACAGCCCTTGGAACTACCTCATTCCACTCACATTCATTCCGCTCGTCGGTGCCATTGCAGCAGGATGCACAGCCGCGCTCAAATTACCAGAGCTGTCGCCCGCGGC…	10.11	1.41333	0.373144	-1.42219
gene07030		Scaffold12	462087-465448	ATGTCTGAATCACCGAACTTCACGATGCTCGCCGCCGTCTATAAGCCAGGGGAGCGGAATCTCGAGCTTGTGCAGACTGCACGACCACTTCCGGGACCTGGAGAGGTGCTACTCAAGATTCTTGCGTGTGGAGTCTGTCACTCAGATGTGAGTGTGCGGATTAACGCTCTACGTATAACTGAGGCAACAATGACCCATACAGCTGTTTATTCTCGATGTCGCAGGTGCCGCGCTCTACCCCAACTCGTTCACGATGGGCCACGAAGCCTGCGGCGAGGTCGTCGCGTGAGTTTCCCCAGTACCATCTTCAATGCCTGTCACAATCTCATGGGCCACTCTTAGGCTCGGAGAAGGGGCAGAAGCTGAAATCGGAGCAGTATACTGCGTTCACATTTCATC…	48.5533	3.60667	0.197989	-2.33651
gene05971	frmA	Scaffold9	1497798-1499627	ATGGCTGACACCGCCGGAAAGACCATCACCTGCAAGGCCGCCGTCGCCTGGGCCGCCAACGAGCCGCTCGTCGTCGAGGACGTCGAGGTCGCCCCGCCCAAGGCCGGCGAGGTCAGGATCCACATCCTCGCGACAGGCATCTGCCACACCGACGAATATACGCGCTCGGGCAAGGACCCTGAGGGCATCTTCCCCGTTATCCTCGGTGAGACCGACCCTTACATGCCCTTCGTTACCGCATTCGCTCAACATGTGCACACGAAGGCCACGAGGGCGGAGGCATTTGTCTCATCGGACGGCGCCCAGGTTGAATCGGTCGGCGAGGGCGTCACCAGCGTCGCACCTGGCGACCATGTTATCCCGCTCTACACCGCTGAGTGCCGCGAATGCAAGTTCTGC…	52.8033	58.1467	3.52049	1.81578
gene05280	pgi	Scaffold8	1218723-1220765	ATGTCCGGCAAGGCTGCCAGTGATTACGCTGCATGGAAGAAGCTGCAGCAGCTGTACGACAGCAACAAGGCCAAGCTCCGGTTCGCCAAGTACTCGCGCGAGTATGTGGACCCGACGGACGCGAGCAACACCTTCCTGCTCGACTTCAGCAAGAACCTGATCGATGAGACCGTGTTCGCGACGCTGCTCGAGCTCGTCGACGAGGCCGGCGTCGAGCGCGCGCGGGACGCCATGTTCGCCGGCGAGCACATCAACACGAGCGAGGACCGCGCGGTGCTGCACATCGCGCTGCGCGACCCCGGCCGCCACTTTGCGCTGACGGAGGAGGGCACGGGCGACGTGGCCGCCGTGCTCGCGCACATGAAGGACTTCACGGACAAGGTGCGCTCGGGCGCCTGG…	570	33.17	0.169609	-2.55971
gene00771	pgk	Scaffold1	2454692-2456230	ATGTCCCTCTCCAAGAAGCTGAGCATCACCGACCTCGACCTCAAGGACAAGCGCGTCCTCATCCGCGTCGACTTCAACGTCCCGCTCGACAAGGAGAACAAAATCACCAACCCGGCCGTGAGCGCCTGCATCGGCTAGCATCTATCTAATCGCCACCCACTCACGCATCCCCAGCGCATCGTCGCCGCCCTCCCCACCATCCAATATGCGCTCGAGAACGGTACGCTTGGGCTCGATGGCTGCACGCTTCGATTGTCTCACAGCCCATCTGTCCAGGCGCAAAGGTCGTCACGCTCATGTCCCATCTCGGCCGCCCCGACGGCAAGGTCGTTCCCAAGTACTCGCTGCGTCCCGTCGCAGACGAGCTCTCGCGCCAGCTTGACAAGAAGGTCACGTTCC…	816.247	51.2433	0.170574	-2.55153
gene02112	adhP	Scaffold3	1345107-1348031	ATGCCGCCCACAATGAACTCTGCATCGACAACGCTGTCAGTGTCTTCCCAGCAGCCCACCACGACGGCGGAAGCGAGCACGTGGAATTCCGACCACGGACTCGGATACGTCTATATCGACGACCGCGTCATACTCGGCGTGGCCTGGGCCATCTTCGGCTGCGTCTTCCTGCTCGCCGTCTGGGGCATCGTACGATGGACAGGCAGCCTGCGCCGGGCGCAAGAGAGACTAGCCCGCGCGAAGCGAAAGCTGCTGTGGTCTACTCCGAAGGAGAACTCAGCGGGAACGTGCCGCCGCGACTGCATGCGATGCGAGCTCCAGCTCGCAAAATGGAACGCCGTACGGAACGCTGCACTGGCGGCTGGCGTCGATGCAGATAGCTACGCTGGGTCGATATCG…	60.92	8.73333	0.466534	-1.09995
gene02777	pyk	Scaffold4	1099154-1101399	ATGAGCTTCATCAACCCGGAGGCGTCGCGCATCAGGTGGCTCTCGAACCTCAAGACGGCGTACGAGCCGAGCGAGGACAAGAAGTACCTGCGCAAGGTCTGTGCCGCCCGACTCTGGCGCTGCTCGTCCGATTGACTCCCCGGCGCAGACGACGATTATCGCGACGATTGGTGGGTTGTGCGGCGCAGGGATGGCAGCGATCTGAGCGCGCAATGCACTGCAGGCCCGAAGACCAACTCGGTTGAAAAGCTCGCTGCGCTGCGCGAGGCGGGCATGAACATCGGTGCGCGCGCGCCCAATAATCTGAATTTCCGCGAAATTTTAATGCTGGAGCGGCAGTGCGGATGAACTTCTCGCACGGAGAGTACGAGTACCACCAGAGCGTGATCGACAACACGC…	448.23	74.4333	0.476419	-1.0697
gene10746	fbaA	Scaffold26	490571-492593	ATGGGCCTCCTTGACATAGTTAAGGTGCAGTCTGCAGTCAAAGCGCCGGTCTGCAGCGTGCTGAGCTTGTGTGCCAGCCTGGCGTGCTCACCGGCGACGACGTCCGCAAGGTGTTCGAGTACGCCCGCGAGCATCAGGTGCGCAGAGCCGTCCCTTGCAATACCCACCGCTCATCCCATTCGTTCAGTTTGCCATCCCCGTACGCGATCCCCATATATGCTTTCCCGCGCCCGCAGACTGACCGGTGAGCGCGACGTCACAAGGCCATCAACGTCACCTCGTCCTCCACCGCGAACGCGTGTCTCGAGGCCGCGCGGTAAGCCAGGCGATGGTACGATTCGGCGGCCGCTCACGCCATAAAAATTTGCATGCAGCGACGTGAAGGCGCCTATTATCCTG…	913.843	66.3233	0.200222	-2.32033
gene03012		Scaffold4	1930711-1932721	ATGCCTCCGACGTTCAGCTACACGTTCGACCACCCGTCGTACAGCGGCAAGGTGACCTTCCCCGCCGGCCTGTACATCGACGGCAAGTGGTCCGACGGCTCCGAGGGCAAGCTCATCGAGTGCGTCGTGCCCGGCTTGTCTTGGTTTCCGCTGGAAGCTGACACGAACGCCGATTGACAGCGTACTCAACCCGACGAACGGCAAGCTGATCGGGCAGATCGCCGAGGGCACGCGCGCAGACGTCGACCGCGCCGTCACCGCCGCGCACAAGGCGTTCAACGAGTCCTGGGGACTCAAGGTACCCGGCTTCGAGCGCGGCAAGCTGCTCATACGGCTCGCGGAGCTCATCGAGGAGCACGCCGACCACCTCGCGGCCATCGAGGCGCTCGACAACGGCAA…	834.237	60.3	0.230682	-2.11602
gene09893		Scaffold22	112345-113380	ATGCCTGTAGAAGTGACTGGGTCGAGGGTAACCCTGACGCACCCCAACGTACGCTCTATTCCAGTCAGACATGAATGTTTCGCTGACGAAATGTACCAGGGTGCATCAGTCACGGCGCTGCTCTACGGCGCTACGATCATCTCCTGGAAGTCTCCCAGCGAAGGCAGAGACGACGTTCCACCAAAGGAGCGCCTCTTCGTCTCCTCAAAGGCTGCCTTGGACGGCTCTAAGCCCGTGCGCGGCGGCATCCCCGTCGTTTTCCCATTCTTCGGCCCCCCGACGCGCCCAGAGCATCAGAAATTCTCGCAGCACGGGTTTGCGCGCAGCTCAAACTGGCACTATGTCTCGACTGTGCTCGACACCAGCGCTGGGGTCAGCGTTCAATTGGGTCAGACATTG…	311.773	26.25	0.250116	-1.99933
gene04771	pdc	Scaffold7	1383887-1386324	ATGCAACACAGGGAGACGATAAGCATAGGCGACTACATGTCAGTCCGAGGCTTGCCACATCATTTCGGAGCCTGAGACAGGCTCACTCACACCTGCACGCAGCGTCGAGCGTCTCAGCCAGGTGCGCGCCCACCGTCGCTCGGGCATAGTGCTGAATAGATTGGCAGCTTGGCGTCAAGGCCGTCTTCGGCGTCCCCGGCGACTTCAACCTGGCGCTCTTGGACAAGATCGACGACCACCCGGAGATGGACTGGGTCGGCTGCTGCAACGAGCTGAATGCTGCATATGCCGCGGATGGGTACTCTCGTGTAGGCCAGGGTGAGAGTCGGCACAGTCACGGTCGCAGTGAGACGGTCGAGTTCAACGTTTGGCAGGGTTGGGAGTGCTTGTCACGACGTA…	0.853333	0.0466667	0.158623	-2.65633
gene07256	gpmI	Scaffold12	1220142-1222179	ATGCCCGCAAAGGTCCAGAACAAAGTCTGCCTCATGTGCGTCTCTTCACCTTGCGCGATTAGGATCTGACGATCGTTTTGTAGCGTGCACGATGGCTGGGGACTGTCAGATGCGCCGGCAGACAAGGGCAACGCCGTTGCTGCAGGCAACACGGAAAACATGGATTCTATCGCGGAAAAGCACAACTTCCGCAAGCTCGCTGCGCATGGTCTCGCAGTCGGTCTCAGCGATGGGCTCATGGGTAACTCTGAAGTTGGGTATGTGATCGATTTGCATGCCATGCCACCGATGGCGATTAATTGAATATCTCACTGGCAACCCACAGGCACTTGAACATTGGCGCGGGCCGTATTGTGTGGCAGGATATCGTCAAGATCGACCAGAGCATTCGGAAACGCG…	445.037	19.6033	0.120751	-3.0499
gene03150	pgm	Scaffold5	157146-159296	ATGTCGAAAGCCAATGTCAAGGTCGTGAGCACCAAGCCCTACGAGGGCCAGAAGCCAGGCACTTCTGGCCTCAGAAAGAGGTCCGTCTACGCAGCATACATCCAGCTCTAGCGTGCTCAAACTCCTTGTGCCAGGGTCAAGATCTTCCAGCAGGAGGTCTGCGCGCTCGCCCGTGGCAGAAATTCCAGCGTCTGAACCGTCGTCCCCCTCTAGCACTATACGGAAAACTTCGTGCAGGCCATCTTCGACAGCGTCAAGCCCGAGGGCTTCACGCTCGTCGTCGGCGGCGACGGCCGTTTCTTCTCCAAGCCCGCCGTCCAAAAGATCATCGCGATCGCGGCCGCCAACGGCGTCAAGAAGCTCATTATTGGCAAGGACGGCATATTCTCGACGCCCGCA…	818.883	34.1367	0.117588	-3.08819
gene04799	pdc	Scaffold7	1464899-1467595	ATGTCAACCTCGCACGACACCGTCACCCATAACGCGTCTCGTCCAGTCGTCATCGAGGGGCTCATCCTCGCTCAGCTCGGCGTCAAGTCCATCTTTGGCGTGCCTGGGGACTTCAACCTCGCGTTCCTGGATGTCGTCGAAGACCACCCGTCGGTCGAGTGGATCGGGTGCTGCAACGAGCTCAACGCTGCCTACGCTGCCGACGGCTACGCGCGCGTTAGCCATGGATTGGGCGTCATCGTGACCACGTTTGGCGTCGGCGAGCTGAGCGCCTTGAATGGCATCGCTGGCGCGTTCAGCGAGCGCGTCCCGGTGTTACACCTCGTCGGCGTACCTTCTACCAAGCTTCAGGCGCACAAGGCACTCCTCCATCATACTCTTGGTGATGGACGATTCAAC…	68.18	0.746667	0.0299424	-5.06166
gene04878	acs	Scaffold7	1769857-1772101	ATGTCTGAGCAGCACGAGCATATCGCCGTCTATCCCGTCGCCTCGCGCGTGCAGGGCAAGGACGGCCGGCCCAAGCCCCATGTTGGGCCAGGCATTGAGGACTACAAGAAGGCGCACGCCGTCACCGTCGGCCCCGGCAGCGACACCTGGTGGGCGCAGACGGCGCAGAGCATGCTCGACTGGATTGTGCCGTTTAAAACGGTCCGCTCTGGTGGGTTCAAGAACGGTGACATCGCGTGGTTCCCCGAGGGCTACCTGAACGCCTCCTACAACTGCGTGGACCGCTGGGCGTTCAAAAACCCCGACAAGGTTAGCCGATCGGCAGTGTTTCTGCTCTGTGTCTCACTCCCGATCACCAGGTTGCCATCATTTACGAGGCTGACGAGCCGGGCGAAGGCA…	163.023	26.1967	0.465742	-1.1024
gene05557	pdhB	Scaffold9	301769-303744	ATGCTGGAGAGCCAGAACGAGAGAGAAGAAGTTGACGTCGAAATGGTCCTTCCACTTGTCGAGCGAGGCGCCAGATGTATCCGTAATGCGCGCGAGCGGGTCGACTATTCCAGCATTGAGCACGAGAGCATCCAGGCCGCCGAATTTATCTTTGGCCGTGGCCACAGCCAGGCTGATAACGTCGGGATCGGTGCTGGATGTATGCGGTTGGGCCATGGGACAGCCTGGTCGGGCGTGGAGTGCTTACACGCTGCCCTGGACGGCGACGAGCTGGTCCGGGTACTTGGACGCGAGATCACGCAGCTCAGGGGGGCTGGAGCGCGAGACGGCGACGACTCTGGCGTTGTGCTCGAGGAAAATGCGGGCGACGGCGAGGCCGATCCCCCTGAGAGGCGCGGC…	121.18	90.4533	2.18469	1.12743
gene06528		Scaffold11	291439-292802	ATGTCGATGCTAGCCGCTGTATACAAACCGGACAGTGAACCTCTTGTCGTTGAGCGCGTCGCCAAACCTACACCCCGCGATGATGAGGTGCTGTTGCGTGTGCGGGCTTGTGGTGCCTGCCATTCAGACGTATGTTCGAGTTTCAGCTCTACATTGCATCACAGAATCTCTCAGACTTCCCCTAGCTTGTTCTCTTGAACTCTCGCGTATACTACCCCGACCCGTTCATCATGGGCCACGAGATCAGCGGGAGGTCGTCGCGTGAGTCGTCGAGCATGAGGGAACCCAGCCTGAGTAGCTATTGATTCACTTTCAGACTAGGAAGTAGTGTGGGTGCAGATATCGTCAAAGGAGCCTTATACAGCGTGAACATCGCCGAGGGACGCCTGCCGGGCAAGT…	97.91	4.48	0.135876	-2.87964
gene01779	gapA	Scaffold3	256668-258148	ATGGTCGTCAAGGTCGGCATTAACGGGTGCGTCGTCGTTGCTGTGTATGCTGCGTACGCTGCCTGGCTGACTGTATGCTGCGCAGATTCGGTTAGTTTGCGTTGCGTGCGACTGGGCTGGGGGCTGAACGAACGACGCAGGGCGCATCGGGCGGATTGTGATGCGCAACGCGCTGCTGAACAAGGAGATCGAGGTGACGGCGATCAACGAGTGCGTGGATGTATGCGCGATCTGGCCGTAGCTCACCGCGGGCAGCCCGTTCATCGACCTGGCGTACATGGTGTACATGTTCAAGTACGACTCGGTGCACGGCCGGTTCAAGGGCAAGGTCGAGACCAAGGACGGCAAGCTCGTCATCGACGGCCACCCCATCGCCGTCTTCGCCGAGCGCGACCCCGC…	2605.89	233.547	0.248359	-2.0095
gene05806		Scaffold9	1040070-1041971	ATGAGCCCCGTTCCCGCACCGCTCGAGACCGCCGAGGCGCTGCGCTGCTCGATCCACACGCCTTGCCAGCTGACGGACCATACGCGCAAGGCGCTGGAGGCGATCGCGCCGGGCTTCAAGTTGACGGACGACAAGCTGCGCGAGATTACGCGCACGTTCCTGAAGGACTTTGAGCTCGGGCTGAGCAAGTACGGCGAGCCCATGGCCATGATCCCCACCTACGTCACCGGCGTGCCCAACGGCAAGGAAGTCGGGTGCGTCTATGCAGCGCTGTACGCCGCATCGCAGCCCATCTGACCGTCCGCGCACAGCACGTTCCTCGCCCTCGACCTGGGCGGCACCAACCTGTGAGCGCCCGCTCGCTGCGGCGCCGCAAGGGCCCACTGCTTACCGCACTCA…	253.153	22.5467	0.257626	-1.95665
gene10798		Scaffold27	116987-118555	ATGAGCTGCATCCACGACCATGAGCCTTCTCGCGCGGCTACCGTGCCGGTTCGTGCATCTGTCGCCTCAAGGCCCAGCTCGGGACCTCTCATCAGCATCGACGCGACCCGCGGATTGTTTCCAAACACGGCCAACCAGGATGATCGATGGAGCCCGAAGCTGAATGCGTCAATGTCGGAGCTGGCCATGGGCACGCGCTCCCCGTCCGCATCTAAACCTCGCGATGTGCTGGCCTCGCGGGATTCTCAGCGTCACACCTCTGCCCTCTCCTCCACGATGCACGCCCACGCGCCGCTGATTGAGGACCCATTCGACGCGGCGACGCACGCCGCCATGGACGCGGAGGTCATGCGCAAGCTCGGAGGCGACCCGTCCACCGATGACGTCGCGTTGTACAAC…	235.773	25.13	0.307751	-1.70016
gene13553		Scaffold59	78085-82458	ATGGCACTCGCTACTCCACTTGAAGACATCCCGCGCGTGCGTACGACCATAATGGCTTTGTGACTCTTTACTTACAGGTTATCACAATAGATTCGCGAGAGCCTACGCGCGGGATTCGCGTCCGGCAAGACGAAAAGCGTCGCATACCGCAAGGAACAGTTGCTCCAGCTCGCATACATGATTCAGGATCACCAGGAGCGCTTTCGTGAGGCGCTTGCTGCCGACCTAGGCCGCCCGTGCGTAGCTGGACATATTATGGTGATTACACGCTTAGATGATGCAGGGGCAACGAGTCCGTGTTCGTCGAGCACGTACCGGTCGTCGAAACGGCGCTGAAGGCGTACGAGTTGGTGGATAAATGGACCAAGCCGGAGGGGATTCCGTTCAGCGTCAATACAT…	346.01	20.5433	0.177977	-2.49024
Table S8.3 Tyrosine metabolism
Gene ID	Gene name	Chrom	Location	Gene	NT	EHT	FC	log2FC
gene05190	gabD	Scaffold8	939196-941493	ATGGCAGCAGCAGCGGTAAGTGCTCCGGACACAAACCTGCCTCTCACCCCGGGCCACTGAGATTTTACTTCATCTACAGTTCGGTTTGAAGGACTCCAGCCTCGTTCACACGCAGGGCTACATCGACGGTAAATGGCTGGACGCAAAGGACGGGACAACGTTCGACGTGACGAGTACGTGCACATGACCTCCAATTCGACAGTGTGTTCAACTGTTAAAGACCCCGCAACGGATGAGGTGCTCGGCGCGGTGGTCGACATGGGCGTCGCGGAGACTAAGGACGCTATCGCCGCGGCAAGCGCTGCGTTCAGGACCTGGTCTCAAACGACGGCGGCCCACAGGCACGACCTCCTCATGAAAGTATGGCCATTACCTTTGGTCGCGCATGTGCGAACTCCT…	102.927	1.34	0.0504874	-4.30793
gene06360		Scaffold10	1281890-1283333	ATGCCAACTCTCGTCCTCACTAGTAACGTCAAGGTGAATCGCAGGCGGACTATACAGTATACGATCAGTATATGACCGAACATAGCCAGTTGATCTGCAGGGATTCGTCAAGGAATTCTCCAAGGCAGGTACTTAATAGCATGTAGAAGCATACCAGCGCTGATCGCTGGCAAGATCTCAGCTGGCACCCTCGGAAAGCCTGAGAAGTATATATCCATTGACTTCCGGCACAACGAGACTCTGTCGTTCGCGGGGACATTCGACCCTGCATTCCGGCTTGAAATTGTACGTTTGCATACTAGCCAGCACATCTCTTACAGTAATGATATTATATAGGTGTCTCTAGGAAACATCAACCCAACTGCAAATGAGAAGTACAGCGCAGCCTTCTTCGCGTTC…	4.43667	0.336667	0.208787	-2.2599
gene03864		Scaffold6	354876-356886	ATGTCTTCGACGACCGACGCTGAGCGCCCCAAGGCGATCGACCTGACGCACCACCTCTCGGACCTCGCGCGCGCGCGGGAGAGCACGCCGCTGCTCGGCCTCGCGAAGTACTGGGGCAAGCCGGGCGTCGTCTCGCTCGCGGGCGGCTTCCCGCACCAGGACTACTTCCCGTTCGCCGCGCTCGGCGGCAAGGTGCTCGCGCCCGACGCGTTCCCGCTCGCCGTGCCGTCCGCGAGCGCCGCGAGCACCGCGCAGTTCAACCCAACTGGCGACGCGGAAAGTGCGCTCAAGCTGCAGGACGTCGCGATCGACAAGGCCACCGGCGACGTGAAACTCGCCGAGGCGCTGCAGTACGCGCTCGTCATGGGCCTCGCGCCGCTGCGCAAGTGGATCGCCGAA…	125.677	5.65667	0.133165	-2.90872
gene07030		Scaffold12	462087-465448	ATGTCTGAATCACCGAACTTCACGATGCTCGCCGCCGTCTATAAGCCAGGGGAGCGGAATCTCGAGCTTGTGCAGACTGCACGACCACTTCCGGGACCTGGAGAGGTGCTACTCAAGATTCTTGCGTGTGGAGTCTGTCACTCAGATGTGAGTGTGCGGATTAACGCTCTACGTATAACTGAGGCAACAATGACCCATACAGCTGTTTATTCTCGATGTCGCAGGTGCCGCGCTCTACCCCAACTCGTTCACGATGGGCCACGAAGCCTGCGGCGAGGTCGTCGCGTGAGTTTCCCCAGTACCATCTTCAATGCCTGTCACAATCTCATGGGCCACTCTTAGGCTCGGAGAAGGGGCAGAAGCTGAAATCGGAGCAGTATACTGCGTTCACATTTCATC…	48.5533	3.60667	0.197989	-2.33651
gene05971	frmA	Scaffold9	1497798-1499627	ATGGCTGACACCGCCGGAAAGACCATCACCTGCAAGGCCGCCGTCGCCTGGGCCGCCAACGAGCCGCTCGTCGTCGAGGACGTCGAGGTCGCCCCGCCCAAGGCCGGCGAGGTCAGGATCCACATCCTCGGTGCGTTATCGCTCAACACAATCGACCCGCGCCCCCCGTCTGAGATCTGACCCTCCAACAGCGACAGGCATCTGCCACACCGACGAATATACGCGCTCGGGCAAGGACCCTGAGGTGGGATCATGAGCACCGTTGTCATCGATCGCGAATCTTACGTCGACACCCCCCGCACAGGGCATCTTCCCCGTTATCCTCGGTGAGACCGACCCTTACATGCCCTTCGTTACCGCATTCGCTCAACATGTGCACACGAAGGCCACGAGGGCGGA…	52.8033	58.1467	3.52049	1.81578
gene00138		Scaffold1	470980-472998	ATGGACATAGAAGAGTGCGTGCGCACGCGCGCAGCAAGACGTTTCTCACACGGCGCAGGTTCAGAAAAGCTGGATACGCCGCCATCGACCAGATATGCGCGAATTACCAGCAACTGGAACAGCGGCCTGTCGTCTCCCAGGTAGAGCCTGGGTATCTGCGCAAGCTGCTCCCAGGTACGACGCGTGACCAGACGCCAAAACGTCGTTAACCCGCGTCTGGTATGTCAGAGCAGGTGCCGGAGGACGGCGAGCGCATTGAGGCGATCACGAACGACTTCCAAGAGGTTATATTGCCTGGTGTGTTTCGGTTTCCCAGAGTCGGAAATATTACTGACGTGGTGGTCAAACATAGGAATCACGCATTGGCAACATCCCAGCTTCTTCGCGTACTTCCCTTCG…	37.75	4.83667	0.376077	-1.4109
gene02112	adhP	Scaffold3	1345107-1348031	ATGCCGCCCACAATGAACTCTGCATCGACAACGCTGTCAGTGTCTTCCCAGCAGCCCACCACGACGGCGGAAGCGAGCACGTGGAATTCCGACCACGGACTCGGATACGTCTATATCGACGACCGCGTCATACTCGGCGTGGCCTGGGCCATCTTCGGCTGCGTCTTCCTGCTCGCCGTCTGGGGCATCGTACGATGGACAGGCAGCCTGCGCCGGGCGCAAGAGAGACTAGCCCGCGCGAAGCGAAAGCTGCTGTGGTCTACTCCGAAGGAGAACTCAGCGGGAACGTGCCGCCGCGACTGCATGCGATGCGAGCTCCAGCTCGCAAAATGGAACGCCGTACGGAACGCTGCACTGGCGGCTGGCGTCGATGCAGATAGCTACGCTGGGTCGATATCG…	60.92	8.73333	0.466534	-1.09995
gene05603	gabD	Scaffold9	448365-451728	ATGTCTCCGCAGTTTGCTAGGCCGTTGCAGACACCCCTCTCCCAGGCGGAGCTCGATGAGGTCAATGCATACCTCGAAACACTCGAGCCCCGCGACATCCTTGCATGGGGGATCGAGCATCTCCCCAATCTCTACCAGACGACTGCCTTTGGTCTCACCGGTCTGGTGGCTATCGACATGCTGTCAAAACTAACGTCCTCTCCCCCGCCACTCATCTTCCTCGACACTCTTTACCACTTTCCGGAAACACTGCAGCTCGTACAGGCAGTGCGCGATCGCTATGACCTGCCTATACACGTCTACAAGCCTTTCTTCTGTGAGACGGTAGAGGATTTCGAGCGCATGCACGGCGAGAAGCTGTGGGAGAACGACGAGGATTCCTACGACTATCTTGTCAAG…	172.577	8.76333	0.138741	-2.84953
gene04977		Scaffold8	229802-232317	ATGTCTACCACCAAGAACGTCCAACATGACATCGTCATCACCGGCGTCCCACCCGCGCCTGGATTTCAACCGACAGCGTACCCGCGCCGCCCCATCGAAGAGCTCGTTAAGGACGAGAAGCAGTTCGCACTATATGTCCAGGCGATGGGTGCGTCTAGTTCGCCGTTGCTCTATACTGCATGCAGCTCTGTGGCGAGCTATGTGCTAATTTTTTCCTCGCATCGTAGACGTGATGCAGAAAACGCGCCCGGACGATATGCTCTCCTGGTTCCAAGTCGGCGGAATCCACGGCGCGCCCGCCGAGCCGTGGGACAACGTCGCGGGGCTCGCAGGTGGCAACACCAGCTGGGAAGGATACTGCACGCACGCGTCTGTCCTCTTCCCCACTTGGCACCGGCC…	138.297	15.5	0.324648	-1.62305
gene04973		Scaffold8	221441-221931	ATGCCCGACCGCGAATGGTTCCTCCACAGCATCTCCAGCGCACACATCCTGCAGGGCAGCTACATGATCACGTTCTTCCTCGGGGCCATCCCAGACTCCATCGAGGAATGGTCGACGTCGGACGCGCTGCTCGGCGTTGTCTGCCAGTACTGCGACTCGGCCCCCGTTCCCCCGGAATACGACTACGACCTCCAGCGCTGCATCCCCCTGCAAAAGGCGCTCAGACGCGCAGGCTTTCGCGACTCGGATGTCGTCTTGCCGTTCCTGCGCAAGAACATCCGCTGGAGGGTTCAGATGGTACGTACTCTATGCCGGCTTGCCTTCTCGCTTCTCGCAGGCTGTCAGAGCTCATCTGTTATCTGCCTCTTTGCTTTGCCCAGGCGAACGGCGACGTTGTCG…	52.11	50.64	3.20958	1.68239
gene04978		Scaffold8	237504-237989	ATGTCCGGGTCCGTGCCGCGCGTTGAATGGTCGCTGCACGTCGTCTCCAACGAGCACGCGCTCGGCCAGAGCTACACCGTGCTCTTCTTCCTCGGCGACGTCCCTGCGTCCGCCGAGAACTGGCGGGAGGCAGACTCGCTTCTCGGGCTTCACGTCTCGCATACGCGCACAGGACACGTTCCGCCGGAGCAAGACCGCCCAATCGAGAGCTTCATTCCGCTGCAGAAGGCTCTCAAGCGCTGCTCGGGCCTGCCTAACTTGACGCCGGACGTTGTCGTGCCGTACCTCCGTAATAACATGCATTGGAGAGTTCAGAAGGTGTGCACGATCTCGCGCTAATTTGCCTGGCACAGCGTCTCACTGTTCACTGTGAAGATGGATGGCGAGGTTGTTGACAAC…	69.3567	62.96	2.67126	1.41752
gene01692		Scaffold2	2750279-2751609	ATGGTCGTTGTTCCAAAACTTGTTCTGGTCGTCGCGGCTCTTTGCGCAGGCTCGTACGCGCTCCCGCCTTGGGTTCAGCCACCGGGCCGCGGTGGCATTCAACCACCGTTCCCTCAAGGAGGTCCACTCTCCGGCCCCCCGGACCACTGCCTTCCCAACCAGTTCAAGGTTCGCAAGGAATGGTACGCCTATTCCGTCCCATCTGTGCTCAGGCAACTCATCGCGAGAAGGGGCAACATGAAGCCCGCCGAGCGCAAGGCCTACACGACCGCGGTTCGCTGCCTGCAGCAGAAGCCGTCCAAGCTCTCACACGACCTCTACAACACGACCTCACGTTACGACGATTTTGTCGCGGTGCACATCAACCTGACGCGCACGGTGCACAACGACGGCATCTTC…	99.76	12.5733	0.347562	-1.52466
gene05321		Scaffold8	1318255-1321546	ATGGCTGACGTCCTGGTCGAGCTTTTTGGCAATATCCCGCTTCCCAAGCTTCTGGAAGGGCTCGAATCCGACATTGACGACCTGCTATGGGTTCTAGAGGCACCTCTCGGAGAGTCTGCTTATCAACGCATCGTCGCGGCGCAGCGACCAGCGCGGGAGCTCGCGCAGACAATGCGGAGCAGGAAGAGCGAGGCGCCGCTCGCAGACGCTTTCCGCGATGCCGTGCTTGCGAGCACAAAGTTGTACGAGTTGCTGACGCCGGCGGCGAAAGCGCGGGTCAACGGCTCCGCACATGAAGCAGGACACCACGCCCCCGATGCGCCGCCGCCTTCCTACGATGAGCATCATCAGCATCGCGCTGCAGCGCACTCACCATCGCCCCCACCTCCTCCTCCGCGT…	79.61	10.8967	0.383687	-1.382
gene01666		Scaffold2	2671275-2672621	ATGCCAGATCTGCGCGCGCTCAGTCACCCTGGCGGCAAACGTATAAAGTCCCAACCACGCTGTCGTTCTCTCCGACCGCGCCCGACATGCACAGATCAGCTCTTGCGCTCTTTTTGCTGGCCACTTTTTTCACCGCTCTCGCGGCTGCGCGCGCGACGGCCCAACATCACGACCACAAGCATCATATTCCTCGGCCTTGTCATCCACATTCAGTCAGAATTCGCAAGGATTGGCGAGTCTACTCCTTGTCGCTATCTTTCGTTAGCTGACACAGTGCTTGCAGGGGCGATCTCAGTCACAAAGAGCGCAAGCACTATCTTGACGCGGTCCTGTGCCTGCAACACAAGCCGTCTCAGCTCGATAACGCGTTGTACAACACAACATCGCGCTACGATGACT…	12.51	1.07667	0.250968	-1.99443
gene06356		Scaffold10	1260469-1267042	ATGCGTGGCGCTACCAGCGGATATAGCGCGTTCCCACACGCGCACGCCGACGTGAGGAACGCACAGCCTGGCACGGTGTTCATTATCGACGAAACGCGGCCGACGTCTGCCCTCGGCACTGTGTACAAGGTCAACGGGAAGGCGCTCTCCATCTCCGCGCCGGCTCTGTTCGCCTATCTCAGAGAAATGCTAACGCAGACCAAGTCTGACGTTGTTAGGAAGGAGCTCCTGTCTTCCATCGCGCAGTTGTCCGGCATCACCTTCGCACTCTTCGAGCACGGCTGGCTGTTCGGAGGCCTGCTTCAAGCTGCAGTGGGCGTCTGCATCCGTCGGAAGTACGACGTCTTGGACAGCAGCACGGGGTGGGCCAAGTGGGGCCAGATATTGCTGGAGCTCACG…	7.03	0.866667	0.344343	-1.53808
gene06358		Scaffold10	1275534-1278048	ATGCCGTCTCTCGCACTCACGACTAACGTCAAGGTCTCAGCTGAAACGCTCGGCAAGCCGGAGAAGTACATTATCATCGACTTCAGGCATAACGAGACGCTCTCGTTCTCGGGCACTTTTGACCCTGCATTCCGGCTTGAAATCTTGTCGCTCAACAACATCAACCCGGAGGCCAACGAGAAGTACAGTGCGGCCTTCTTCGCGTTCTTCAAGGAGAAGCTCGGTGTGCCCGGAGATCGCGGATACATCTTATTCACTGACCCTGGTAAGGCGTTCCTGGGGAGCTCCTTGTACCTCTTTGGTGTCACGCTGGACGCTGGCGCTCGTGCTTTCGCCCGGATAGACGATAATCCCGCCACCGTAGTCGACTTCGCATCCCCAACACGAGGGCCACATCAC…	31.28	5.31	0.483566	-1.04822
gene05124	hisC	Scaffold8	737896-739292	ATGCCTATCCACGGACTGAACCCAGCGCTCCTGGCGTCCCCCAAGCCTGCGCATTTCGACATCGAGCGCGTGATACGGCCGAATATCCTGGCGCTTCATCCGTATCGCTGCGCGCGCGATGATTATCAGTCCGGCATCCTCCTGGACGCGAATGAGAACGCGCTCGGACACGCTATCCCACGCTCCGGAGCAACGCGCGAGGCGGACGACATGCTCGACGTCGACCTACACCGGTATCCCGATCCGGCGCAGGTGGAGATAAAGGCGCGTATCGCGGAGATGCGGCTAGGGGATGCAAGAAAACATGACCATGTCTTCCTCGGTGTCGGCTCGGACGAGGTCATCGATCTCCTCATGCGCGTGTGCTGCATACCTGGCGAGGACCGCATCTTGACGACC…	92.6	91.37	2.89356	1.53284
gene06528		Scaffold11	291439-292802	ATGTCGATGCTAGCCGCTGTATACAAACCGGACAGTGAACCTCTTGTCGTTGAGCGCGTCGCCAAACCTACACCCCGCGATGATGAGGTGCTGTTGCGTGTGCGGGCTTGTGGTGCCTGCCATTCAGACGTATGTTCGAGTTTCAGCTCTACATTGCATCACAGAATCTCTCAGACTTCCCCTAGCTTGTTCTCTTGAACTCTCGCGTATACTACCCCGACCCGTTCATCATGGGCCACGAGATCAGCGGGAGGTCGTCGCGTGAGTCGTCGAGCATGAGGGAACCCAGCCTGAGTAGCTATTGATTCACTTTCAGACTAGGAAGTAGTGTGGGTGCAGATATCGTCAAAGGAGCCTTATACAGCGTGAACATCGCCGAGGGACGCCTGCCGGGCAAGT…	97.91	4.48	0.135876	-2.87964
gene02817	hpaI	Scaffold4	1221340-1222340	ATGCTGCAAGTCGCCCACCCGCTGCTCAACGCCCTGCGTGCATCCAAGCCCGCGTTCGGCGCGTGGCTGACGCTCGCGAACCCGTCGCTCGCGCGCGCCGTCGCGCTCTCGCACCCGGCCATCTCGTGGGTGTGCCTCGACGGCGAGCACGGCCTGTTCGGCCTCGGCGGCCCCGCAGTGCACGACACGCTCTCCGTGCTCGCAGCGCTGCCCGGCGGCGGGCCTACGGCGTACATCCGCATCCCGGCCACGGCGGAGACAGACTCGGTCGGGTGGCAGGTCAAGCTCGCGCTCGACTCTGGCGCGCGCGGCGTCCTCGTGCCGATGTGCCCCGACGCCGCGGCGGCGAAGCGCGTCGCGCAGGCCGCACGCTTCCCGCCGGTCGGCGTCCGCGGACTG…	1091.92	14.12	0.0383479	-4.70471
gene12469		Scaffold40	202000-208951	ATGCCATCTGTCGCTCCTCAGGATAAAGTCCTCGTCACCGGTACATACGCTAGCCCCGATAGCCTATGCCAGCTTGTAACCTCTCGCAGGCGCATCCGGTTTTGTCGGTGCCTGGGTCGCACGTGCTCTCCTCGAACACGGCTTCGCCGTCCGCGGCACAGTACGCTCGCACTCTAAAGGTGCATACCTGCAAAACATGTTCGACGCCTCGCACCCCGGGCTGTTCGAGTATGCCATCGTAGAGGACATCAGCGCTGTACGGGTGCTCGAATTCACCTCGGAATCTCTGGCATTGACGATTGGGAGCAGCCAGGTGCATTCGACGAGGCAGTCAGGGGCGTCTCCGGCATTGCGCACACTGCGTCTCCTGTAACGCACGCGGAGGATCCGCAGGGTGTG…	78.8867	11.8333	0.421563	-1.24618
gene00581		Scaffold1	1833857-1834658	ATGAAGGCTCGTATTATCCCACCCAGTCGCAACCGCGACTTGACGTTGGAAACAGTCGAACTTGGCGTTGTCATTGGACGCAGAGGGCGTGACATTCCCTCGGCGCAAGCGGAGTCGTACATCGCGGGCTATGGTTCGTCTTCTAGCTCCTGCCTGGAAGAACTTGACATCGTTTCAGCACTCGCGATCGACATGACGGGTCGCAACATCCAGGACGACGTCAAGAAGAAGGCAAGAACAGGATCATCTCAGCTTCACTGCGCGCCGTAACCGCCCGCAGGGTCTTCCGTGGACCACAGCCAAGGGTTTCGACACCTTCACACGTATGTTTGAGGGTGCGGTGGTTGCAGCAGCCAACGATGCCACGCTCTCGCAGCTATAGGTCCATTTATCCCCAAG…	30.93	2.58	3.52306	1.81683
gene03826		Scaffold6	209929-217940	ATGGTGACTTTGTCACTTCTCTCGCTCCCGGCGCATTTCTCGACATACTGCTTTCTCTTCTTCTTCTTCTCCGCCTCCTTCTTCTCCGCCTTCCTCTTCATCGCCTCCGCCAGCACCGAATACCAGCCGGTTTCTCCGATGCCTCCGTTATGTGAGTTGTATCCCTCATTCTGCGCTTGAGGCAGTCAGTGGTAGGAGAGCAAGAGACGCTGTTGTGGTCTGTTGCTCCCTTCCGAGGTTGTTGTACAGCCGACGTGGTGGGATAGCGTTGTGGAGAACCACAGCGTTGTTCCGAACGACGCGAAGCGTGGTGCGCAACGCGGCGCCAAAACTTATGCACGCAAGCCACTCGATTCACGACGGAGCACCTGATAACTTTCGGGTCGGTAGCTACAATTG…	91.5833	15.55	0.496663	-1.00966
gene05226	gabD	Scaffold8	1059823-1066727	ATGGCAGCAGCAGCTGTAGGTCCCATGGTCGTGTCCACGCCCGTGAAAATTGACTTGTGGTTGTCTTCAGTTCGGTCTCAACGACTCGGGCCTCGTCCACACCAATGGCTACATCAATGGCAAGTGGCTCGACGCGAAGGACACAAAGGGAGGGGAAACGTTCGATGTGACGAGTGAGTGCGCATTGACGTCCATTTTAGTATGCACTCACTGCGACTGTCAAGATCCCGCAACGGATGAGACGCTCGCCGCTGTGGCCGACATGGACGTCGCGGGGGCGAAGGAGGCCATTGGCGCGGGCTATGTTAAGTGTTCATTATCTGGTATAATGGTCCCAAGTTGCTCAGTATAGAAACCTGGGACTTGTGGTCCCAGGTTTCCATGGTCCCAAGATTCATA…	27.6933	2.5	0.268264	-1.89827
